# Supplementary material for: Quantitative Proteomic Analysis Provides Novel Insights into Cold Stress Responses in Petunia Seedlings
Source: Front Plant Sci. 2016 Feb 25;7:136. doi: 10.3389/fpls.2016.00136 (PMC4766708; doi:10.3389/fpls.2016.00136)
Supplement: Table S6 — Relative quantification and significance analysis of proteins detected in each replicate of all samples. [file Table6.XLSX]

## Sheet: 2430 common proteins
Accession	Description	MW [kDa]	calc. pI	Coverage	Unique Peptides	Significance analysis
						Group 1-4					Group CK					t-test p value
						1/REF	2/REF	3/REF	4/REF	Average1	CK1/REF	CK2/REF	CK3/REF	CK4/REF	Average2
M1BC14	Uncharacterized protein OS=Solanum tuberosum GN=PGSC0003DMG400016219 PE=3 SV=1 - [M1BC14_SOLTU]	28.1857	8.1626	5.1	1	1.10397	1.13795	1.09004	1.11552	1.11187	0.881839	0.869361	0.914593	0.896067	0.890465	4.18814e-06
M1D7N7	Uncharacterized protein OS=Solanum tuberosum GN=PGSC0003DMG400033903 PE=4 SV=1 - [M1D7N7_SOLTU]	15.5502	8.104	11.18	1	1.23721	1.35712	1.14326	1.19659	1.23355	0.737715	0.842286	0.742374	0.694568	0.754236	0.000243931
E2FAX1	COSII_At5g14320 (Fragment) OS=Solanum peloquinianum PE=4 SV=1 - [E2FAX1_9SOLN]	52.3308	5.96045	10.54	1	1.11317	1.26781	1.19254	1.14638	1.17998	0.7874	0.941881	0.789253	0.779695	0.824557	0.000508228
Q40878	P17 (Fragment) OS=Petunia hybrida GN=PePer1 PE=2 SV=1 - [Q40878_PETHY]	71.3926	5.13525	9.13	3	0.87399	0.901527	0.924618	0.929959	0.907523	0.998093	1.07075	1.04769	1.04809	1.04116	0.000614584
M1CAV1	Uncharacterized protein OS=Solanum tuberosum GN=PGSC0003DMG400024723 PE=4 SV=1 - [M1CAV1_SOLTU]	20.7777	10.7554	20.86	1	0.894888	0.924959	0.949705	0.845145	0.903674	1.06202	1.15984	1.19271	1.11083	1.13135	0.000947896
M1BC44	Beta-hexosaminidase OS=Solanum tuberosum GN=PGSC0003DMG400016240 PE=3 SV=1 - [M1BC44_SOLTU]	59.5395	7.2251	5.84	3	0.96803	0.906871	0.960318	0.923747	0.939742	1.02698	1.05899	1.07	1.10136	1.06433	0.00108107
K4D3T8	Uncharacterized protein OS=Solanum lycopersicum GN=Solyc10g085040.1 PE=4 SV=1 - [K4D3T8_SOLLC]	20.0054	8.1626	11.11	2	1.30711	1.25143	1.14628	1.12453	1.20734	0.837083	0.862059	0.783849	0.806417	0.822352	0.00127412
K4AY19	Uncharacterized protein OS=Solanum lycopersicum GN=Solyc01g081270.2 PE=3 SV=1 - [K4AY19_SOLLC]	20.9159	4.91943	4.44	2	1.14911	1.0515	1.05302	1.0865	1.08503	0.925817	0.875134	0.916066	0.938291	0.913827	0.00144703
M1B500	Uncharacterized protein OS=Solanum tuberosum GN=PGSC0003DMG400014345 PE=4 SV=1 - [M1B500_SOLTU]	56.337	7.04932	10.13	2	1.14169	1.0525	1.31002	1.28602	1.19756	0.717277	0.752965	0.692222	0.820424	0.745722	0.00211899
K4C4A7	Uncharacterized protein OS=Solanum lycopersicum GN=Solyc06g016800.1 PE=4 SV=1 - [K4C4A7_SOLLC]	34.5784	9.62744	4.52	1	1.13591	1.12418	1.37929	1.29618	1.23389	0.843781	0.898057	0.815081	0.600438	0.789339	0.00266032
M1CA24	Uncharacterized protein OS=Solanum tuberosum GN=PGSC0003DMG400024546 PE=4 SV=1 - [M1CA24_SOLTU]	13.6351	9.99365	45.83	3	0.941144	0.982363	0.923558	0.971098	0.954541	1.01265	1.0341	1.04734	1.08222	1.04408	0.00414182
M1B986	Uncharacterized protein OS=Solanum tuberosum GN=PGSC0003DMG402015497 PE=3 SV=1 - [M1B986_SOLTU]	36.7059	9.21729	20.85	1	0.941066	0.920833	0.839938	0.943699	0.911384	1.15691	1.18873	1.03651	1.05962	1.11044	0.00581581
E5F371	Dehydrin (Fragment) OS=Solanum chilense GN=PLC3015 PE=3 SV=1 - [E5F371_SOLCI]	13.2656	4.84326	12.5	2	1.34239	1.69406	1.13579	1.21334	1.34639	0.552358	0.512051	0.643262	0.650075	0.589437	0.00643255
M1BQ50	Uncharacterized protein OS=Solanum tuberosum GN=PGSC0003DMG400019563 PE=3 SV=1 - [M1BQ50_SOLTU]	26.7923	9.49561	30.96	9	0.942306	0.966133	0.91533	0.990103	0.953468	1.00141	1.05362	1.04196	1.05251	1.03737	0.00688124
K4BLW4	Uncharacterized protein OS=Solanum lycopersicum GN=Solyc03g118130.2 PE=4 SV=1 - [K4BLW4_SOLLC]	17.2581	9.87646	6.33	1	1.09346	1.1649	1.01973	1.06395	1.08551	0.999117	0.884252	0.906812	0.898498	0.92217	0.00690227
M1AWZ7	Glutathione peroxidase OS=Solanum tuberosum GN=PGSC0003DMG400012344 PE=3 SV=1 - [M1AWZ7_SOLTU]	18.7664	7.07861	5.33	1	1.16792	1.29295	0.987022	1.17334	1.15531	0.794612	0.693077	0.911918	0.906868	0.826619	0.00750194
K4D0F3	Uncharacterized protein OS=Solanum lycopersicum GN=Solyc10g049970.1 PE=4 SV=1 - [K4D0F3_SOLLC]	20.3476	9.31982	3.89	1	0.881492	0.821327	0.853836	0.78867	0.836331	1.11474	1.06437	1.16259	1.33861	1.17008	0.00769641
M1BFY2	Uncharacterized protein OS=Solanum tuberosum GN=PGSC0003DMG400017198 PE=4 SV=1 - [M1BFY2_SOLTU]	12.9259	10.521	21.01	2	1.30568	1.27101	1.18995	1.01707	1.19593	0.912379	0.933679	0.774703	0.859761	0.87013	0.00800145
M1B638	Uncharacterized protein OS=Solanum tuberosum GN=PGSC0003DMG400014622 PE=4 SV=1 - [M1B638_SOLTU]	56.5987	5.37646	1.33	1	0.851605	0.881936	0.879413	1.02963	0.910646	1.13011	1.09871	1.02948	1.16873	1.10676	0.009163
M1C0V6	Fructose-bisphosphate aldolase OS=Solanum tuberosum GN=PGSC0003DMG400022263 PE=3 SV=1 - [M1C0V6_SOLTU]	36.8671	6.59521	25.22	3	1.04766	1.02713	1.05271	1.08203	1.05238	0.982626	0.935635	0.997335	0.912177	0.956943	0.00972113
K4B7V1	Uncharacterized protein OS=Solanum lycopersicum GN=Solyc02g069690.1 PE=4 SV=1 - [K4B7V1_SOLLC]	60.3962	9.12939	2.22	1	0.898448	0.869408	0.815515	0.935448	0.879705	1.03248	1.1265	1.06515	1.26008	1.12105	0.0102217
M1CXI6	Aspartate aminotransferase OS=Solanum tuberosum GN=PGSC0003DMG400029897 PE=3 SV=1 - [M1CXI6_SOLTU]	50.807	8.54346	20.13	8	1.01745	1.03451	1.0093	1.01683	1.01952	1.00183	0.995942	0.972968	0.981954	0.988173	0.0107564
M1CP96	Uncharacterized protein OS=Solanum tuberosum GN=PGSC0003DMG400027916 PE=4 SV=1 - [M1CP96_SOLTU]	56.3038	5.65576	3.14	1	1.14309	1.05956	1.48751	1.19119	1.22034	0.662934	0.940677	0.837059	0.725423	0.791524	0.0112213
K4BV98	Uncharacterized protein OS=Solanum lycopersicum GN=Solyc04g080190.2 PE=4 SV=1 - [K4BV98_SOLLC]	13.1737	9.30518	6.67	1	1.05888	1.05737	1.0264	1.00035	1.03575	0.957876	0.971452	0.992085	0.96403	0.971361	0.0116106
Q9FXS3	Probable phospholipid hydroperoxide glutathione peroxidase OS=Nicotiana tabacum PE=2 SV=1 - [GPX4_TOBAC]	6.68133	8.104	16.67	1	1.04785	1.16993	1.01717	1.08198	1.07923	0.945708	0.878072	0.982874	0.908412	0.928766	0.0117886
B5LAT1	Putative ketol-acid reductoisomerase OS=Capsicum annuum PE=2 SV=1 - [B5LAT1_CAPAN]	63.3102	6.94678	13.71	1	0.948268	0.989016	0.991089	0.964327	0.973175	1.01371	1.09311	1.04168	1.04313	1.04791	0.0120168
M1B641	Elongation factor Tu OS=Solanum tuberosum GN=PGSC0003DMG400014624 PE=3 SV=1 - [M1B641_SOLTU]	49.1142	6.75635	15.96	4	0.97656	0.956245	1.00584	0.947309	0.971488	1.02634	1.01642	1.06939	1.08822	1.05009	0.0120379
Q9AWA9	Non-symbiotic hemoglobin class 1 OS=Solanum lycopersicum GN=Glb1 PE=2 SV=1 - [Q9AWA9_SOLLC]	10.3794	8.646	21.74	1	1.04671	1.12267	1.02378	1.0182	1.05284	0.928345	0.976904	0.885855	0.967743	0.939712	0.012437
Q3LHL1	Short chain dehydrogenase OS=Solanum tuberosum GN=PPS6 PE=2 SV=1 - [Q3LHL1_SOLTU]	27.1689	6.55127	7.66	1	1.12519	1.1015	1.02742	1.03495	1.07226	1.01659	0.960136	0.911259	0.923151	0.952784	0.0124544
K4CUX6	Elongation factor Tu OS=Solanum lycopersicum GN=Solyc09g073000.2 PE=3 SV=1 - [K4CUX6_SOLLC]	19.6191	6.53662	17.22	2	0.964065	0.961584	0.915353	0.923444	0.941112	1.03023	1.1361	1.01464	1.08032	1.06532	0.0131833
M0ZPC7	Uncharacterized protein OS=Solanum tuberosum GN=PGSC0003DMG400001985 PE=3 SV=1 - [M0ZPC7_SOLTU]	46.5899	6.55127	13.13	5	1.05618	1.08357	0.992842	1.0988	1.05785	0.933496	0.959224	0.953048	0.933985	0.944938	0.0135114
K4B1F9	Uncharacterized protein OS=Solanum lycopersicum GN=Solyc01g102310.2 PE=4 SV=1 - [K4B1F9_SOLLC]	82.1862	4.33545	1.07	1	1.0589	1.12058	1.05949	0.995858	1.05871	0.883535	0.936177	0.98094	0.968169	0.942205	0.013642
B7ST71	Glutathione-dependent formaldehyde dehydrogenase (Fragment) OS=Capsicum annuum GN=GSNOR1 PE=2 SV=1 - [B7ST71_CAPAN]	35.8203	6.93213	19.82	1	0.890863	0.880733	0.990691	0.904788	0.916769	1.03372	1.20324	1.03225	1.16153	1.10768	0.0141931
K4D5L7	Uncharacterized protein OS=Solanum lycopersicum GN=Solyc11g010560.1 PE=3 SV=1 - [K4D5L7_SOLLC]	146.277	6.75635	1.44	2	1.03593	1.00537	1.06941	1.10271	1.05335	1.01176	0.920764	0.948309	0.938647	0.954869	0.0143843
Q07346	Glutamate decarboxylase OS=Petunia hybrida GN=GAD PE=1 SV=1 - [DCE_PETHY]	56.6898	5.70654	27.6	11	1.08764	1.01134	1.01541	1.06508	1.04487	0.946715	0.951718	0.970402	0.95506	0.955974	0.0145216
Q5BN14	Pyruvate decarboxylase 1 (Fragment) OS=Petunia hybrida GN=PDC1 PE=2 SV=1 - [Q5BN14_PETHY]	54.4183	6.30322	7.69	2	0.924853	0.904423	0.884744	1.04378	0.93945	1.08111	1.12149	1.023	1.17675	1.10059	0.0158544
P30360	Probable cinnamyl alcohol dehydrogenase 2 OS=Nicotiana tabacum GN=CAD19 PE=1 SV=1 - [CADH2_TOBAC]	83.409	6.48096	18.67	9	1.10812	1.06866	1.05089	1.16716	1.09871	1.00306	0.899561	0.956045	0.797142	0.913951	0.0164769
M1B196	Uncharacterized protein OS=Solanum tuberosum GN=PGSC0003DMG400013362 PE=4 SV=1 - [M1B196_SOLTU]	77.1838	5.64307	4.93	3	0.930732	0.938097	0.900335	0.997754	0.94173	1.11035	1.04445	0.986201	1.07178	1.05319	0.0165004
M1A2B4	Uncharacterized protein OS=Solanum tuberosum GN=PGSC0003DMG400005120 PE=3 SV=1 - [M1A2B4_SOLTU]	37.6077	7.94287	22.41	5	1.06633	1.10283	1.09036	1.10418	1.09093	0.957599	0.98942	0.916452	0.818766	0.920559	0.0165992
M1BU65	Uncharacterized protein OS=Solanum tuberosum GN=PGSC0003DMG400020548 PE=4 SV=1 - [M1BU65_SOLTU]	21.1171	9.78857	16.13	1	0.91565	0.993537	0.921111	0.941116	0.942854	1.07913	0.989223	1.12879	1.05498	1.06303	0.0168329
Q43779	Superoxide dismutase [Cu-Zn] 2 OS=Solanum lycopersicum GN=SODCC.5 PE=3 SV=3 - [SODC2_SOLLC]	76.5359	5.70654	7.83	2	0.77314	0.856492	1.00684	0.975746	0.903055	1.16639	1.13511	1.17063	1.09844	1.14264	0.0169624
K4CW69	Cyanate hydratase OS=Solanum lycopersicum GN=CYN PE=3 SV=1 - [K4CW69_SOLLC]	17.6451	6.94678	13.46	2	1.10166	1.05806	1.00475	1.03147	1.04899	0.941039	0.919912	0.943409	1.01344	0.954451	0.0172714
K4C604	Uncharacterized protein OS=Solanum lycopersicum GN=Solyc06g053170.2 PE=4 SV=1 - [K4C604_SOLLC]	4.48626	8.20654	23.08	1	1.01133	1.06089	1.01942	1.09266	1.04607	0.954481	0.993047	0.918517	0.985391	0.962859	0.0172905
Q38HT5	Uncharacterized protein OS=Solanum tuberosum GN=PGSC0003DMG400017593 PE=2 SV=1 - [Q38HT5_SOLTU]	15.7246	10.4478	21.83	4	0.900223	0.927268	0.97787	0.931248	0.934152	1.03664	1.00489	1.15596	1.08474	1.07056	0.0174056
M1CTC4	Uncharacterized protein OS=Solanum tuberosum GN=PGSC0003DMG400028839 PE=3 SV=1 - [M1CTC4_SOLTU]	48.8273	5.98584	30.7	2	1.01821	1.06533	0.980524	1.05259	1.02916	0.909745	0.934328	0.963713	0.983383	0.947792	0.0179539
M1CIW6	Uncharacterized protein OS=Solanum tuberosum GN=PGSC0003DMG400026575 PE=3 SV=1 - [M1CIW6_SOLTU]	33.2176	8.29443	8.86	2	0.803691	1.00467	0.851046	0.992243	0.912912	1.19018	1.1107	1.03305	1.14021	1.11853	0.0179614
K4B3L4	Uncharacterized protein OS=Solanum lycopersicum GN=Solyc01g110010.2 PE=4 SV=1 - [K4B3L4_SOLLC]	91.1563	6.52197	2.8	1	1.24522	1.04712	1.20086	1.0279	1.13027	0.768301	1.03769	0.850164	0.844572	0.875182	0.0180445
Q6T2D5	Catalase (Fragment) OS=Solanum tuberosum PE=2 SV=2 - [Q6T2D5_SOLTU]	54.9084	7.09326	26.32	5	1.16259	1.15459	1.07249	1.11965	1.12733	0.966275	0.960062	0.909616	0.728528	0.89112	0.0180949
Q8S346	Putative expansin OS=Capsicum annuum GN=upa7a PE=2 SV=1 - [Q8S346_CAPAN]	27.6301	8.52881	3.91	1	1.0849	1.03795	1.02606	1.03273	1.04541	1.00635	0.930566	0.996387	0.959064	0.97309	0.0183025
M1BDY3	Uncharacterized protein OS=Solanum tuberosum GN=PGSC0003DMG400016687 PE=4 SV=1 - [M1BDY3_SOLTU]	25.103	7.29834	5.29	1	1.06005	0.986827	1.0632	1.09071	1.0502	0.981877	0.935389	0.975124	0.94694	0.959832	0.0185686
K4C876	Uncharacterized protein OS=Solanum lycopersicum GN=Solyc06g069030.2 PE=4 SV=1 - [K4C876_SOLLC]	28.0968	9.49561	3.63	1	1.08585	1.00454	1.22976	1.17346	1.1234	0.929291	0.998026	0.907848	0.76118	0.899086	0.0187197
K4B112	Uncharacterized protein OS=Solanum lycopersicum GN=Solyc01g099780.2 PE=4 SV=1 - [K4B112_SOLLC]	12.4714	6.12549	8.33	1	1.05502	1.12461	1.09656	0.994926	1.06778	0.84569	0.905711	0.881125	1.022	0.913631	0.0196888
M1BEC3	Histone H3 OS=Solanum tuberosum GN=PGSC0003DMG400016793 PE=3 SV=1 - [M1BEC3_SOLTU]	15.3966	11.1509	16.91	1	0.887314	0.908473	1.02213	0.748865	0.891695	1.07499	1.03771	1.24631	1.12126	1.12007	0.0205804
M0ZIB2	Uncharacterized protein OS=Solanum tuberosum GN=PGSC0003DMG400000505 PE=4 SV=1 - [M0ZIB2_SOLTU]	73.9349	7.21045	2.66	1	1.10891	1.15594	1.54121	1.09572	1.22545	0.803076	0.741218	0.874207	0.744811	0.790828	0.0218363
K4ASZ2	Uncharacterized protein OS=Solanum lycopersicum GN=Solyc01g007940.2 PE=4 SV=1 - [K4ASZ2_SOLLC]	52.6288	6.1001	14.59	1	1.19655	1.13411	1.00675	1.17617	1.1284	0.896778	0.972577	0.954623	0.690999	0.878744	0.0221103
Q94I89	Putative NtPRp27-like protein (Fragment) OS=Atropa belladonna PE=2 SV=1 - [Q94I89_ATRBE]	25.2487	8.00146	8.07	2	0.781166	0.902902	0.824005	1.06952	0.894399	1.25485	1.20213	1.06831	1.0558	1.14527	0.0223468
P48498	S-adenosylmethionine synthase 1 OS=Petunia hybrida GN=SAM1 PE=2 SV=1 - [METK1_PETHY]	30.1843	5.92236	23.33	2	1.04164	1.14306	0.985682	1.10262	1.06825	0.923619	0.908213	0.938434	0.958011	0.932069	0.0241413
M1CDF4	Uncharacterized protein OS=Solanum tuberosum GN=PGSC0003DMG400025309 PE=3 SV=1 - [M1CDF4_SOLTU]	39.4474	7.02002	3.19	1	0.976081	0.99843	0.91287	0.991728	0.969777	1.0713	1.03307	1.04636	1.02019	1.04273	0.0245249
M1B8C7	Uncharacterized protein OS=Solanum tuberosum GN=PGSC0003DMG400015266 PE=4 SV=1 - [M1B8C7_SOLTU]	59.5655	7.1665	4.36	2	1.09943	1.05669	1.03346	1.04949	1.05977	1.02465	0.909114	0.962029	0.887304	0.945773	0.0255568
M1DL46	Uncharacterized protein OS=Solanum tuberosum GN=PGSC0003DMG400040332 PE=3 SV=1 - [M1DL46_SOLTU]	7.98243	9.5249	34.29	1	0.91744	0.964624	0.960664	0.961118	0.950962	1.07254	0.989043	1.14533	1.09275	1.07492	0.025733
M1DE97	Uncharacterized protein OS=Solanum tuberosum GN=PGSC0003DMG400037226 PE=4 SV=1 - [M1DE97_SOLTU]	12.2345	5.63037	16.51	1	1.15706	1.15968	1.01334	1.07012	1.10005	0.994048	0.994444	0.881773	0.787791	0.914514	0.0262711
M1B7H6	Uncharacterized protein OS=Solanum tuberosum GN=PGSC0003DMG400015016 PE=3 SV=1 - [M1B7H6_SOLTU]	55.1283	6.29053	5.12	2	0.84282	0.908933	0.754923	0.863078	0.842439	1.01212	1.25744	0.966638	1.22916	1.11634	0.0265503
K4CHM8	Uncharacterized protein OS=Solanum lycopersicum GN=Solyc07g065500.1 PE=4 SV=1 - [K4CHM8_SOLLC]	19.8585	6.15088	5	1	0.932255	0.963077	1.01976	0.925424	0.960129	1.11082	0.992741	1.04115	1.0871	1.05795	0.0287643
M1APP3	ATP-dependent Clp protease proteolytic subunit OS=Solanum tuberosum GN=PGSC0003DMG402010580 PE=3 SV=1 - [M1APP3_SOLTU]	26.1564	8.68994	4.62	1	0.999172	1.04378	1.06484	1.04997	1.03944	0.988279	0.926888	0.955055	1.01255	0.970693	0.0287723
K4D3F2	Uncharacterized protein OS=Solanum lycopersicum GN=Solyc10g083650.1 PE=4 SV=1 - [K4D3F2_SOLLC]	24.4208	8.39697	17.11	2	0.943886	0.97906	0.955331	0.997	0.968819	1.0575	0.982375	1.03101	1.05643	1.03183	0.0292928
M1AL60	Uncharacterized protein OS=Solanum tuberosum GN=PGSC0003DMG400009744 PE=4 SV=1 - [M1AL60_SOLTU]	18.7394	4.70361	4.52	1	1.11786	1.1506	0.9753	1.03684	1.07015	0.941623	0.84578	0.974781	0.949268	0.927863	0.0298708
Q9FEB8	Acetolactate synthase (Fragment) OS=Solanum ptychanthum PE=3 SV=1 - [Q9FEB8_SOLPT]	61.9501	6.18896	5.11	1	1.05669	0.999264	1.02307	1.10498	1.046	0.996772	0.910001	0.974621	0.965377	0.961693	0.0300545
B6EWX5	UDP-glucose:glucosyltransferase OS=Lycium barbarum GN=UGT74N1 PE=2 SV=1 - [B6EWX5_LYCBA]	52.0295	5.38916	3.25	2	1.04121	1.11548	0.992432	1.0936	1.06068	0.971528	1.00257	0.966648	0.902656	0.960851	0.0302704
M1BGF6	Uncharacterized protein OS=Solanum tuberosum GN=PGSC0003DMG400017311 PE=3 SV=1 - [M1BGF6_SOLTU]	74.3698	6.52197	14.86	10	1.00914	1.04566	1.01634	1.06473	1.03397	1.01713	0.960887	0.973195	0.932781	0.970998	0.0305636
M1C4X8	Uncharacterized protein OS=Solanum tuberosum GN=PGSC0003DMG400023319 PE=3 SV=1 - [M1C4X8_SOLTU]	46.1364	7.75244	4.4	2	0.898141	0.913041	0.943317	0.920806	0.918826	0.97486	1.134	1.05882	1.18033	1.087	0.0306432
Q94IK0	Ferredoxin-thioredoxin-reductase catalytic subunit B OS=Solanum tuberosum GN=ftrbpot PE=2 SV=1 - [Q94IK0_SOLTU]	16.7359	6.87354	17.57	3	1.09071	1.05624	1.0492	1.0884	1.07114	0.986849	0.989728	0.910364	0.82408	0.927755	0.0308113
M1A4T9	Uncharacterized protein OS=Solanum tuberosum GN=PGSC0003DMG400005749 PE=4 SV=1 - [M1A4T9_SOLTU]	24.5533	5.69385	10.7	1	0.952311	1.02763	0.900613	0.958842	0.959848	1.03141	1.09401	1.0413	1.03635	1.05077	0.0309538
Q2XPW5	40S ribosomal protein S3a OS=Solanum tuberosum PE=2 SV=1 - [Q2XPW5_SOLTU]	29.7396	9.40771	32.69	4	0.890367	1.04872	0.947147	0.876249	0.940621	1.0038	1.14949	1.12384	1.06183	1.08474	0.0311458
M1BS78	Uncharacterized protein OS=Solanum tuberosum GN=PGSC0003DMG400020101 PE=4 SV=1 - [M1BS78_SOLTU]	5.42176	9.5249	23.4	1	0.96456	0.99786	0.922401	0.89643	0.945313	1.02747	1.058	0.989887	1.1292	1.05114	0.0313446
P61046	Cytochrome b6-f complex subunit 8 OS=Nicotiana tabacum GN=petN PE=1 SV=1 - [PETN_TOBAC]	164.321	8.23584	21.57	15	1.05092	1.01947	0.993654	1.04938	1.02836	1.00184	0.944996	0.992432	0.943109	0.970595	0.0315772
M1D6S9	Ribosomal protein L15 OS=Solanum tuberosum GN=PGSC0003DMG400033143 PE=3 SV=1 - [M1D6S9_SOLTU]	24.1882	11.4878	31.37	7	0.966223	0.964409	0.907668	0.888905	0.931801	1.0937	0.971642	1.18605	1.08453	1.08398	0.0322808
K4C3J6	Uncharacterized protein OS=Solanum lycopersicum GN=Solyc06g008160.2 PE=4 SV=1 - [K4C3J6_SOLLC]	32.458	9.20264	6.53	2	0.992268	0.959887	0.961272	0.970432	0.970965	1.04478	1.10565	0.996437	1.05322	1.05002	0.0326038
K4B860	Uncharacterized protein OS=Solanum lycopersicum GN=Solyc02g070790.2 PE=3 SV=1 - [K4B860_SOLLC]	31.9085	9.24658	4.33	1	0.95974	0.973339	0.976134	0.877931	0.946786	1.11914	1.14521	1.02385	0.995332	1.07088	0.0336559
M1AWS8	Uncharacterized protein OS=Solanum tuberosum GN=PGSC0003DMG400012308 PE=4 SV=1 - [M1AWS8_SOLTU]	34.0673	5.87158	5.28	1	0.922769	0.808943	1.01477	0.912767	0.914812	1.19508	1.12236	0.949227	1.19224	1.11473	0.0342999
M1C7B2	Uncharacterized protein OS=Solanum tuberosum GN=PGSC0003DMG401023851 PE=3 SV=1 - [M1C7B2_SOLTU]	25.1285	10.1694	30.84	8	0.972783	0.991014	0.981918	0.962094	0.976952	1.05913	1.00748	1.01352	1.00308	1.0208	0.0344088
M1ARJ5	Uncharacterized protein OS=Solanum tuberosum GN=PGSC0003DMG400011047 PE=4 SV=1 - [M1ARJ5_SOLTU]	43.1784	10.4478	26.6	3	0.868312	1.03155	0.868194	0.928586	0.92416	1.09817	0.968848	1.11736	1.0689	1.06332	0.0344201
M1A7Q3	Uncharacterized protein OS=Solanum tuberosum GN=PGSC0003DMG404006439 PE=4 SV=1 - [M1A7Q3_SOLTU]	38.8566	5.80811	11.21	4	1.0267	1.03318	1.15971	1.04076	1.06508	0.929056	0.938786	0.988355	0.977015	0.958303	0.0351
M1D227	Carbonic anhydrase OS=Solanum tuberosum GN=PGSC0003DMG400030984 PE=3 SV=1 - [M1D227_SOLTU]	28.1422	5.69385	26.56	4	1.03239	1.06621	1.06527	0.980332	1.03605	0.89393	0.990214	0.954069	0.98289	0.955276	0.0351504
M1BZ12	Uncharacterized protein OS=Solanum tuberosum GN=PGSC0003DMG400021812 PE=4 SV=1 - [M1BZ12_SOLTU]	13.4531	10.4624	21.67	1	0.88919	0.950516	1.03217	0.895465	0.941835	0.970648	1.14781	1.09851	1.09219	1.07729	0.0360942
K4D3J0	Uncharacterized protein OS=Solanum lycopersicum GN=Solyc10g084040.1 PE=4 SV=1 - [K4D3J0_SOLLC]	23.8653	6.53662	4.57	1	0.979925	1.16724	1.0776	1.05234	1.06928	0.859031	0.8806	0.968764	1.00596	0.92859	0.0361053
M1C8P1	Uncharacterized protein OS=Solanum tuberosum GN=PGSC0003DMG400024208 PE=4 SV=1 - [M1C8P1_SOLTU]	22.8038	5.60498	3.43	1	1.07119	1.07908	0.976689	1.11092	1.05947	0.905747	1.00674	0.874531	0.988374	0.943848	0.036528
K4B558	Uncharacterized protein OS=Solanum lycopersicum GN=Solyc02g027080.1 PE=4 SV=1 - [K4B558_SOLLC]	106.133	6.75635	2.05	2	1.1212	1.16816	0.972428	1.09124	1.08826	1.0097	0.91662	0.984258	0.86987	0.945112	0.0367672
Q3HRW8	60S ribosomal protein L18a OS=Solanum tuberosum GN=PGSC0003DMG400008285 PE=2 SV=1 - [Q3HRW8_SOLTU]	21.3553	10.2427	34.83	1	0.888859	1.00332	0.902699	0.929237	0.931029	1.06088	0.96533	1.08853	1.1711	1.07146	0.0370607
Q9ZWH9	Elongation factor 1-alpha OS=Nicotiana paniculata GN=NpeEF1A PE=2 SV=1 - [Q9ZWH9_NICPA]	19.422	6.68311	32.78	1	1.11624	0.998815	1.01763	1.0807	1.05335	0.920756	0.918631	0.958	1.0239	0.955321	0.0375408
M1BLI7	Uncharacterized protein OS=Solanum tuberosum GN=PGSC0003DMG401018597 PE=4 SV=1 - [M1BLI7_SOLTU]	42.3683	8.19189	3.64	1	1.00661	0.936392	0.994665	0.948525	0.971547	1.00217	1.03094	1.02924	1.08811	1.03761	0.0380594
M1A0N5	Uncharacterized protein OS=Solanum tuberosum GN=PGSC0003DMG400004738 PE=3 SV=1 - [M1A0N5_SOLTU]	86.3701	5.5542	20.84	5	1.02583	1.03034	1.02954	1.06881	1.03863	0.977535	1.00145	0.940421	0.877453	0.949215	0.0384871
M1CV08	Uncharacterized protein OS=Solanum tuberosum GN=PGSC0003DMG401029307 PE=4 SV=1 - [M1CV08_SOLTU]	41.189	5.45264	3.28	1	0.952302	0.96548	1.01224	0.911309	0.960334	1.05761	1.13221	0.995811	1.03675	1.05559	0.0391979
M1A6L9	Uncharacterized protein OS=Solanum tuberosum GN=PGSC0003DMG400006175 PE=3 SV=1 - [M1A6L9_SOLTU]	31.6664	7.59131	20.21	4	1.13054	1.06048	1.02538	1.04361	1.065	1.04874	0.920312	0.964957	0.928372	0.965594	0.0393401
K4CJ02	Uncharacterized protein OS=Solanum lycopersicum GN=Solyc08g013670.2 PE=4 SV=1 - [K4CJ02_SOLLC]	17.5388	8.92432	25.15	4	1.07166	1.16525	0.944142	1.17571	1.08919	1.02193	0.891359	0.885112	0.850276	0.91217	0.0398105
K4B6Q6	Uncharacterized protein OS=Solanum lycopersicum GN=Solyc02g064700.2 PE=4 SV=1 - [K4B6Q6_SOLLC]	49.4318	9.36377	8.43	3	0.906016	0.971305	1.00885	1.02894	0.978777	1.03765	1.1212	1.03834	1.07262	1.06745	0.0414021
M1BN36	Uncharacterized protein OS=Solanum tuberosum GN=PGSC0003DMG400019029 PE=4 SV=1 - [M1BN36_SOLTU]	63.0615	4.91943	1.97	1	1.0549	1.13663	1.13488	1.00442	1.08271	0.907974	1.04988	0.945884	0.824284	0.932005	0.0426164
I7J2T7	Ran GTPase activating protein 2 OS=Solanum phureja GN=RanGAP2 PE=4 SV=1 - [I7J2T7_9SOLN]	43.6052	5.43994	38.02	1	1.02042	1.09025	0.986204	1.07111	1.042	1.00014	0.918081	0.984967	0.952708	0.963975	0.042693
K4BP24	Uncharacterized protein OS=Solanum lycopersicum GN=Solyc04g008680.2 PE=4 SV=1 - [K4BP24_SOLLC]	154.139	8.66064	0.59	1	1.00994	1.21906	1.03606	1.04212	1.0768	0.912051	0.919199	0.877974	0.993469	0.925673	0.0427367
M1BFU7	Uncharacterized protein OS=Solanum tuberosum GN=PGSC0003DMG400017176 PE=4 SV=1 - [M1BFU7_SOLTU]	24.4159	8.55811	5.8	1	1.06922	1.15803	1.46488	0.999648	1.17294	0.788521	0.956757	0.809153	0.828201	0.845658	0.0428623
K4CA36	Uncharacterized protein OS=Solanum lycopersicum GN=Solyc06g076780.2 PE=4 SV=1 - [K4CA36_SOLLC]	45.6915	4.93213	4.55	1	0.97969	1.15843	1.38785	1.12433	1.16258	0.935298	0.922877	0.982576	0.657837	0.874647	0.0429367
K4C2H7	Uncharacterized protein OS=Solanum lycopersicum GN=Solyc05g055000.2 PE=3 SV=1 - [K4C2H7_SOLLC]	52.2033	6.59521	5.03	2	1.00913	1.00591	1.05417	1.02986	1.02477	0.996252	0.997151	0.982636	0.981872	0.989478	0.0437277
Q84UY3	Alcohol dehydrogenase 2 OS=Petunia hybrida GN=adh2 PE=2 SV=1 - [Q84UY3_PETHY]	15.6769	5.79541	46.04	2	0.95465	0.865894	0.694037	1.01977	0.883588	1.03447	1.07028	1.07321	1.27529	1.11331	0.0446101
Q5EEY5	SGT1 OS=Nicotiana benthamiana PE=2 SV=1 - [Q5EEY5_NICBE]	33.3569	5.40186	5.67	2	0.912756	0.984653	0.887145	1.02478	0.952334	1.04244	1.04143	1.06224	1.07264	1.05469	0.0447796
Q32ZI8	PEN2-like protein (Fragment) OS=Solanum tuberosum PE=3 SV=1 - [Q32ZI8_SOLTU]	16.6375	6.31592	5.48	1	0.728471	0.959683	0.891109	0.97402	0.888321	1.12541	1.36968	0.997034	1.07922	1.14284	0.0450494
P32111	Probable glutathione S-transferase OS=Solanum tuberosum GN=PRP1 PE=2 SV=1 - [GSTX1_SOLTU]	200.322	6.06201	5.38	7	1.01745	1.01415	1.01949	1.03141	1.02062	0.965864	1.01822	0.965555	0.961422	0.977765	0.0458363
M1AMW1	Uncharacterized protein OS=Solanum tuberosum GN=PGSC0003DMG400010119 PE=3 SV=1 - [M1AMW1_SOLTU]	32.9902	10.1401	7.32	1	0.91176	0.899782	1.0498	0.82487	0.921552	1.00379	1.19221	1.04353	1.0703	1.07746	0.0464666
M1AUS1	Uncharacterized protein OS=Solanum tuberosum GN=PGSC0003DMG400011790 PE=3 SV=1 - [M1AUS1_SOLTU]	41.664	9.42236	4.74	1	1.04322	1.01333	1.31363	1.08218	1.11309	0.877954	0.942378	0.826964	0.96588	0.903294	0.0464794
K4BMR7	Uncharacterized protein OS=Solanum lycopersicum GN=Solyc03g121180.2 PE=4 SV=1 - [K4BMR7_SOLLC]	19.9103	8.95361	18.89	3	1.12407	1.03471	1.05462	0.999386	1.0532	0.979045	0.995068	0.964653	0.949044	0.971953	0.046574
P21342	Pyrophosphate--fructose 6-phosphate 1-phosphotransferase subunit alpha OS=Solanum tuberosum PE=1 SV=1 - [PFPA_SOLTU]	67.1146	7.31299	10.71	5	0.992119	0.993336	0.944435	1.00325	0.983286	1.01822	1.04104	1.00878	1.08639	1.03861	0.0466487
Q2LFC1	AGO4-2 (Fragment) OS=Nicotiana benthamiana PE=1 SV=1 - [Q2LFC1_NICBE]	101.419	8.77783	8.95	2	0.839591	0.944357	1.01727	0.988123	0.947335	1.0651	1.06195	1.04874	1.10102	1.0692	0.0470979
M1AXT6	Uncharacterized protein OS=Solanum tuberosum GN=PGSC0003DMG400012550 PE=4 SV=1 - [M1AXT6_SOLTU]	23.1201	5.65576	4.69	1	1.10035	1.15369	0.92972	1.12891	1.07817	0.896064	0.798107	0.966573	0.987642	0.912096	0.0473142
Q1A531	Phospholipase C OS=Petunia integrifolia subsp. inflata PE=2 SV=1 - [Q1A531_PETIN]	67.0256	6.27783	13.95	8	1.10173	1.05302	1.03048	0.967256	1.03812	0.993872	0.942792	0.930867	0.945272	0.953201	0.0476226
K4CAF8	Uncharacterized protein OS=Solanum lycopersicum GN=Solyc06g083030.2 PE=4 SV=1 - [K4CAF8_SOLLC]	56.1749	5.85889	2.4	1	1.09814	1.16792	0.998261	1.02977	1.07352	0.967026	1.03394	0.90022	0.851959	0.938285	0.0485539
K4D5V2	Uncharacterized protein OS=Solanum lycopersicum GN=Solyc11g011470.1 PE=4 SV=1 - [K4D5V2_SOLLC]	79.8556	6.23975	7.04	4	0.991215	1.04817	1.00998	0.949851	0.999803	0.953373	0.936593	0.913711	0.948441	0.938029	0.0489501
E2FAU0	COSII_At5g14320 (Fragment) OS=Solanum marinasense PE=4 SV=1 - [E2FAU0_9SOLN]	20.4312	9.92041	17.42	2	0.887458	1.01514	1.01938	0.930623	0.96315	1.07013	1.14275	1.01858	1.04059	1.06801	0.0490373
K4ASP6	Methionine aminopeptidase OS=Solanum lycopersicum GN=Solyc01g006800.2 PE=3 SV=1 - [K4ASP6_SOLLC]	44.1264	8.01611	6.94	3	0.947959	0.952151	1.04718	0.901493	0.962195	1.03656	1.12995	1.01258	1.06371	1.0607	0.0490888
K4C3D3	Uncharacterized protein OS=Solanum lycopersicum GN=ACI29 PE=4 SV=1 - [K4C3D3_SOLLC]	25.9708	10.4331	42.36	10	0.967712	0.993274	0.929751	0.932946	0.955921	1.07456	0.991388	1.14521	1.02012	1.05782	0.0494043
Q2XPW6	NAD-dependent epimerase/dehydratase family protein-like protein OS=Solanum tuberosum PE=2 SV=1 - [Q2XPW6_SOLTU]	45.3704	6.53662	18.36	1	1.06623	0.995102	1.02692	1.08457	1.04321	0.956165	0.993257	0.979985	1.0038	0.983302	0.050235
M1BIN2	Uncharacterized protein OS=Solanum tuberosum GN=PGSC0003DMG400017893 PE=4 SV=1 - [M1BIN2_SOLTU]	19.2427	4.729	20.71	3	1.0508	1.00326	0.996925	1.07973	1.03268	0.982254	0.934045	0.997666	0.975535	0.972375	0.0506597
M1AGA0	Uncharacterized protein OS=Solanum tuberosum GN=PGSC0003DMG400008593 PE=4 SV=1 - [M1AGA0_SOLTU]	48.8947	5.32568	1.63	1	0.992364	1.15497	1.07789	1.34082	1.14151	1.02514	0.647789	0.972481	0.821663	0.866769	0.0513361
K4AY73	Histone H3 OS=Solanum lycopersicum GN=Solyc01g086800.2 PE=3 SV=1 - [K4AY73_SOLLC]	9.68556	11.8833	27.06	1	0.849728	1.01255	0.73862	0.743781	0.83617	1.08012	0.951135	1.45954	1.13576	1.15664	0.0524879
K4BPT1	Uncharacterized protein OS=Solanum lycopersicum GN=Solyc04g014270.2 PE=4 SV=1 - [K4BPT1_SOLLC]	58.4228	8.25049	3.38	1	0.968811	0.882801	1.02236	0.894565	0.942133	0.970398	1.17377	1.08477	1.05786	1.0717	0.0531299
A5YVF1	Protein SUPPRESSOR OF GENE SILENCING 3 OS=Solanum lycopersicum GN=SGS3 PE=1 SV=1 - [SGS3_SOLLC]	208.07	7.85498	3.72	4	1.0569	1.0635	0.995709	1.01987	1.03399	0.971908	1.02371	0.973917	0.938091	0.976908	0.0537309
M1C6D8	Uncharacterized protein OS=Solanum tuberosum GN=PGSC0003DMG400023632 PE=4 SV=1 - [M1C6D8_SOLTU]	33.1633	5.43994	3	1	1.00077	0.972977	0.941063	0.918509	0.958331	1.10069	0.969067	1.10908	1.03571	1.05364	0.0540628
M1D3Q1	Uncharacterized protein OS=Solanum tuberosum GN=PGSC0003DMG402031379 PE=3 SV=1 - [M1D3Q1_SOLTU]	93.5086	5.32568	10.25	2	1.11281	1.08015	1.07618	1.09923	1.09209	0.851825	0.918382	1.07758	0.947111	0.948724	0.054164
G3LY22	Auto-inhibited Ca2+-transporting ATPase 10 OS=Solanum lycopersicum PE=2 SV=1 - [G3LY22_SOLLC]	117.762	6.84424	2.5	2	1.11154	0.963259	1.14207	1.08863	1.07638	0.971737	0.965062	0.968247	0.930601	0.958912	0.0542779
M1AWK7	Uncharacterized protein OS=Solanum tuberosum GN=PGSC0003DMG400012259 PE=4 SV=1 - [M1AWK7_SOLTU]	30.7588	5.14795	3.37	1	0.941042	0.960725	0.869534	1.0354	0.951674	1.07013	0.993433	1.04106	1.11869	1.05583	0.054508
M0ZJZ3	Uncharacterized protein OS=Solanum tuberosum GN=PGSC0003DMG402000895 PE=4 SV=1 - [M0ZJZ3_SOLTU]	60.2896	7.62061	4.11	2	1.07489	1.05024	1.06238	0.982516	1.0425	1.02386	0.987566	0.930091	0.916572	0.964523	0.0546174
A0MLW6	MRNA-binding protein (Fragment) OS=Capsicum annuum PE=2 SV=1 - [A0MLW6_CAPAN]	18.7216	7.45947	46.75	3	1.06474	1.05031	1.06408	0.991332	1.04262	0.902768	0.977973	1.02973	0.941993	0.963116	0.0549885
M1AQ30	Uncharacterized protein OS=Solanum tuberosum GN=PGSC0003DMG400010677 PE=3 SV=1 - [M1AQ30_SOLTU]	65.0647	5.42725	12.75	2	0.968618	1.04491	1.09778	1.04559	1.03922	0.921423	1.0228	0.957537	0.908758	0.952631	0.0573503
M1B4I6	Uncharacterized protein OS=Solanum tuberosum GN=PGSC0003DMG400014239 PE=3 SV=1 - [M1B4I6_SOLTU]	29.3611	6.43018	20.31	2	0.959109	0.993609	1.06995	1.03456	1.01431	0.972863	0.923903	0.923529	0.961984	0.94557	0.0579588
M1CU50	Uncharacterized protein OS=Solanum tuberosum GN=PGSC0003DMG400029071 PE=4 SV=1 - [M1CU50_SOLTU]	21.8517	9.84717	3.59	1	1.14176	1.23158	1.15752	1.02732	1.13955	1.08444	0.93959	0.873228	0.661159	0.889603	0.0581982
M0ZW28	Uncharacterized protein OS=Solanum tuberosum GN=PGSC0003DMG400003632 PE=3 SV=1 - [M0ZW28_SOLTU]	22.4398	10.4478	9.18	2	0.909253	0.854908	0.77002	0.936411	0.867648	1.14705	0.91382	1.37343	1.10873	1.13576	0.0586194
M1C115	GrpE protein homolog OS=Solanum tuberosum GN=PGSC0003DMG400022301 PE=3 SV=1 - [M1C115_SOLTU]	23.652	5.5542	3.81	1	1.02771	1.06868	0.956733	1.06835	1.03037	0.96276	0.946799	0.958946	0.943738	0.953061	0.0587339
Q7DM89	Aldehyde oxidase 1 homolog (Fragment) OS=Solanum lycopersicum GN=TAO1 PE=1 SV=1 - [Q7DM89_SOLLC]	132.462	6.48096	1.98	2	1.03469	1.04992	1.00616	0.997157	1.02198	1.01505	0.973923	0.972808	0.977312	0.984774	0.0596152
K4C7M6	Uncharacterized protein OS=Solanum lycopersicum GN=Solyc06g065980.2 PE=4 SV=1 - [K4C7M6_SOLLC]	13.4921	8.88037	11.67	2	0.895143	0.987494	0.911031	1.03693	0.957648	1.17589	1.02523	1.04243	1.03602	1.06989	0.0606438
M1AGZ2	Uncharacterized protein OS=Solanum tuberosum GN=PGSC0003DMG400008773 PE=4 SV=1 - [M1AGZ2_SOLTU]	70.3127	7.69385	2.08	1	1.13167	1.00277	1.03629	1.01504	1.04644	0.981516	0.884501	0.985478	0.980375	0.957967	0.0608539
Q5XXQ6	Catalase (Fragment) OS=Petunia hybrida PE=4 SV=1 - [Q5XXQ6_PETHY]	17.7188	5.14795	21.29	1	1.13044	1.09165	1.1779	1.03824	1.10956	0.998628	1.02901	0.882051	0.703378	0.903267	0.0612461
K4AYJ2	Uncharacterized protein OS=Solanum lycopersicum GN=Solyc01g088020.2 PE=4 SV=1 - [K4AYJ2_SOLLC]	121.483	5.32568	5.87	6	0.985501	1.02372	0.983952	0.997307	0.997621	1.0204	1.00573	1.04651	1.03545	1.02702	0.0612594
P24091	Endochitinase B OS=Nicotiana tabacum GN=CHN50 PE=1 SV=1 - [CHI2_TOBAC]	34.6984	7.92822	8.33	2	0.861257	0.894229	0.964483	0.887606	0.901894	0.99294	1.03384	1.10679	1.33363	1.1168	0.0615205
K4CGU4	Uncharacterized protein OS=Solanum lycopersicum GN=Solyc07g062610.2 PE=4 SV=1 - [K4CGU4_SOLLC]	31.7409	5.40186	3.67	1	0.915778	0.788319	0.927887	1.05362	0.921401	0.998397	1.02022	1.12409	1.18875	1.08286	0.0628317
M0ZI03	Uncharacterized protein OS=Solanum tuberosum GN=PGSC0003DMG400000433 PE=4 SV=1 - [M0ZI03_SOLTU]	40.3666	5.93506	9.44	2	1.03713	1.07093	1.13096	0.997	1.05901	0.896349	1.05041	0.82995	0.941903	0.929653	0.0634264
M1CDX2	Uncharacterized protein OS=Solanum tuberosum GN=PGSC0003DMG402025430 PE=3 SV=1 - [M1CDX2_SOLTU]	43.8211	8.52881	17.48	1	0.943086	0.933541	0.891988	0.882674	0.912822	1.01135	1.08768	0.967298	0.939718	1.00151	0.0639249
K4CUK9	Uncharacterized protein OS=Solanum lycopersicum GN=Solyc09g065830.2 PE=3 SV=1 - [K4CUK9_SOLLC]	20.2223	9.08545	5	1	0.863302	0.966654	0.943262	1.01531	0.947131	0.98676	1.14675	1.00497	1.11866	1.06428	0.0640802
M1A379	Uncharacterized protein OS=Solanum tuberosum GN=PGSC0003DMG400005353 PE=4 SV=1 - [M1A379_SOLTU]	105.558	6.03662	1.62	2	0.971858	0.905004	1.03278	0.951773	0.965353	1.00232	1.11447	1.01356	1.0663	1.04916	0.0641656
M0ZJ84	Uncharacterized protein OS=Solanum tuberosum GN=PGSC0003DMG400000708 PE=4 SV=1 - [M0ZJ84_SOLTU]	12.2507	5.04639	40.83	1	1.09661	1.15604	1.06872	1.08736	1.10218	0.980415	0.977455	0.951617	0.672361	0.895462	0.0657128
Q3HRZ1	Vacuolar protein sorting-associated protein 26-like protein OS=Solanum tuberosum PE=2 SV=1 - [Q3HRZ1_SOLTU]	34.914	6.94678	3.67	1	0.869	0.937015	0.976328	1.02126	0.9509	1.07516	1.18515	0.979755	1.05123	1.07282	0.0657775
K4ATC0	Uncharacterized protein OS=Solanum lycopersicum GN=Solyc01g009240.2 PE=4 SV=1 - [K4ATC0_SOLLC]	63.0483	8.57275	4.18	1	0.929429	0.925512	1.0714	0.772543	0.924721	1.049	1.14928	1.00522	1.1751	1.09465	0.0658137
K4CR90	Uncharacterized protein OS=Solanum lycopersicum GN=Solyc09g010630.2 PE=3 SV=1 - [K4CR90_SOLLC]	6.72753	9.61279	26.67	1	1.06722	1.09406	0.950099	1.06544	1.04421	0.942849	0.96673	0.93754	0.977455	0.956144	0.0659632
M1CCS3	UDP-glucose 6-dehydrogenase OS=Solanum tuberosum GN=PGSC0003DMG400025137 PE=3 SV=1 - [M1CCS3_SOLTU]	51.4035	6.45557	13.79	1	0.949558	0.937374	0.809056	0.935107	0.907774	0.912788	1.15168	1.06512	1.21844	1.08701	0.0661836
M9WR14	DIM (Fragment) OS=Petunia hybrida PE=2 SV=1 - [M9WR14_PETHY]	53.6668	8.93896	9.07	3	0.94	0.912449	0.989945	0.963189	0.951395	0.984032	0.969468	1.02829	1.05306	1.00871	0.0663246
M1B4F8	Uncharacterized protein OS=Solanum tuberosum GN=PGSC0003DMG400014224 PE=4 SV=1 - [M1B4F8_SOLTU]	19.6223	6.27783	19.77	2	1.06486	1.04646	1.08565	1.00709	1.05102	0.891194	1.01666	1.01874	0.915996	0.960647	0.06644
M1BE00	Uncharacterized protein OS=Solanum tuberosum GN=PGSC0003DMG402016696 PE=4 SV=1 - [M1BE00_SOLTU]	49.7364	6.29053	4.69	2	1.07522	1.05518	1.0134	1.02896	1.04319	0.896207	1.01045	1.01339	0.904708	0.956188	0.0671207
M1B4L3	Uncharacterized protein OS=Solanum tuberosum GN=PGSC0003DMG400014254 PE=3 SV=1 - [M1B4L3_SOLTU]	110.923	5.66846	2.73	2	1.05773	1.05286	0.96121	1.14219	1.0535	0.957024	0.863274	1.01448	0.945373	0.945039	0.0673256
M1D577	Uncharacterized protein OS=Solanum tuberosum GN=PGSC0003DMG400032146 PE=4 SV=1 - [M1D577_SOLTU]	59.2693	7.59131	9.69	5	1.07043	1.05717	1.04579	1.00628	1.04492	1.02989	0.951501	1.00528	1.00103	0.996924	0.0680595
M1CQE7	Uncharacterized protein OS=Solanum tuberosum GN=PGSC0003DMG400028208 PE=4 SV=1 - [M1CQE7_SOLTU]	14.2845	5.80811	11.54	1	0.985251	1.01842	1.06107	1.04036	1.02628	0.960545	0.975848	0.957394	1.01914	0.978233	0.0682091
M0ZY46	Uncharacterized protein OS=Solanum tuberosum GN=PGSC0003DMG400004095 PE=4 SV=1 - [M0ZY46_SOLTU]	39.5779	8.104	19.44	6	0.926776	0.989886	0.868869	1.01363	0.94979	1.10342	1.10433	0.96873	1.03079	1.05182	0.0689401
K4CEN4	Uncharacterized protein OS=Solanum lycopersicum GN=Solyc07g044760.2 PE=4 SV=1 - [K4CEN4_SOLLC]	67.1047	9.37842	5.08	1	1.01565	1.15322	1.07469	1.11533	1.08972	0.815482	1.11077	0.843353	0.862828	0.908109	0.0697205
K4B3X7	Uncharacterized protein OS=Solanum lycopersicum GN=Solyc01g111140.2 PE=4 SV=1 - [K4B3X7_SOLLC]	14.4054	5.07178	6.67	1	0.931595	0.921252	1.03521	0.971452	0.964879	1.01496	1.13427	0.998807	1.06516	1.0533	0.0699432
M1AYY7	Uncharacterized protein OS=Solanum tuberosum GN=PGSC0003DMG400012800 PE=3 SV=1 - [M1AYY7_SOLTU]	51.6336	8.1333	12.47	1	0.985131	1.07055	1.10245	1.00489	1.04075	0.933221	0.941686	0.967648	1.01812	0.96517	0.0701466
K4CMH3	Uncharacterized protein OS=Solanum lycopersicum GN=Solyc08g074550.2 PE=3 SV=1 - [K4CMH3_SOLLC]	64.2323	7.47412	3.6	2	0.971479	0.978599	0.951457	1.02574	0.981818	1.07663	1.00466	1.01582	1.02658	1.03092	0.0703777
K4DH15	Uncharacterized protein OS=Solanum lycopersicum GN=Solyc12g094430.1 PE=3 SV=1 - [K4DH15_SOLLC]	18.0622	7.95752	15.53	1	1.07141	1.1946	1.02618	0.963491	1.06392	0.888725	0.920188	0.943899	0.985157	0.934492	0.0706271
M1BRF8	Uncharacterized protein OS=Solanum tuberosum GN=PGSC0003DMG402019891 PE=3 SV=1 - [M1BRF8_SOLTU]	27.9884	9.94971	30.58	7	0.974143	0.995224	1.00638	0.960471	0.984054	1.05516	0.982887	1.05364	1.02567	1.02934	0.0713277
M1B9C1	Histone H4 OS=Solanum tuberosum GN=PGSC0003DMG400015525 PE=3 SV=1 - [M1B9C1_SOLTU]	11.4184	11.4731	41.75	2	0.90191	0.962859	0.897055	0.903402	0.916307	1.02734	0.93555	1.20871	1.14372	1.07883	0.0714107
M1A8C3	Uncharacterized protein OS=Solanum tuberosum GN=PGSC0003DMG400006613 PE=4 SV=1 - [M1A8C3_SOLTU]	56.2635	9.31982	4.44	2	1.00608	0.911952	0.807325	1.02262	0.936995	1.13277	1.01387	1.1294	1.01212	1.07204	0.071754
K4BXC7	Uncharacterized protein OS=Solanum lycopersicum GN=Solyc05g009530.2 PE=3 SV=1 - [K4BXC7_SOLLC]	41.9081	9.53955	7.27	2	0.957437	0.978087	0.940685	0.972593	0.9622	1.09729	0.985858	1.01862	1.00499	1.02669	0.0724323
Q9S6Z0	ATP synthase subunit beta (Fragment) OS=Petunia axillaris GN=atpB PE=3 SV=1 - [Q9S6Z0_9SOLA]	25.5641	5.68115	58.33	2	1.04674	1.09747	0.964467	1.17584	1.07113	1.05355	0.896801	0.939581	0.876279	0.941552	0.0727581
M1CJD7	Uncharacterized protein OS=Solanum tuberosum GN=PGSC0003DMG400026716 PE=3 SV=1 - [M1CJD7_SOLTU]	53.3512	5.13525	39.46	1	1.08461	0.980722	1.04558	1.12787	1.0597	1.047	0.940865	0.965054	0.878005	0.957731	0.0731051
M1CYM5	Uncharacterized protein OS=Solanum tuberosum GN=PGSC0003DMG400030185 PE=3 SV=1 - [M1CYM5_SOLTU]	14.2945	10.814	36.59	1	0.891854	0.952316	0.796754	0.923551	0.891119	1.12518	0.90835	1.33166	1.10005	1.11631	0.0742937
K4C6J6	Uncharacterized protein OS=Solanum lycopersicum GN=Solyc06g060150.2 PE=4 SV=1 - [K4C6J6_SOLLC]	39.7779	8.95361	3.36	1	1.12408	0.996212	1.17663	0.993758	1.07267	1.02078	0.945962	0.965357	0.860334	0.948108	0.0755242
M9WMF8	PIG03 N-acetyltransferase-like protein (Fragment) OS=Petunia hybrida PE=2 SV=1 - [M9WMF8_PETHY]	18.9018	6.26514	13.61	2	0.914934	0.895344	0.88127	0.996089	0.921909	1.05564	0.949505	1.09372	1.26921	1.09202	0.077486
Q38M60	40S ribosomal protein SA OS=Solanum tuberosum PE=2 SV=1 - [Q38M60_SOLTU]	30.1981	5.22412	31.29	1	1.08931	1.03939	1.0613	0.984549	1.04364	1.04746	0.951396	0.951708	0.924684	0.968811	0.0775806
M1A6N6	Uncharacterized protein OS=Solanum tuberosum GN=PGSC0003DMG400006186 PE=3 SV=1 - [M1A6N6_SOLTU]	42.2098	7.00537	34.72	8	1.06432	0.945362	1.1154	1.10038	1.05637	0.916731	1.02733	0.959721	0.914032	0.954454	0.0777995
K4AS65	Uncharacterized protein OS=Solanum lycopersicum GN=Solyc00g323130.2 PE=4 SV=1 - [K4AS65_SOLLC]	24.3861	5.35107	12.86	2	0.907161	0.916338	0.9441	0.959565	0.931791	0.961109	1.20654	1.01016	1.12032	1.07453	0.0783121
M1AXT5	Uncharacterized protein OS=Solanum tuberosum GN=PGSC0003DMG400012550 PE=4 SV=1 - [M1AXT5_SOLTU]	16.0176	6.31592	5.37	1	1.0583	1.0429	0.969701	1.09032	1.04031	0.903967	0.904189	1.0107	1.00638	0.956309	0.0789405
K4CK63	Uncharacterized protein OS=Solanum lycopersicum GN=Solyc08g042050.2 PE=4 SV=1 - [K4CK63_SOLLC]	81.4687	6.69775	5.23	3	1.08928	1.15017	0.970455	1.05835	1.06706	1.04	0.835494	0.995209	0.865808	0.934126	0.0791257
Q307Y8	Ribosomal protein L11-like protein OS=Solanum tuberosum GN=PGSC0003DMG400020434 PE=2 SV=1 - [Q307Y8_SOLTU]	20.777	9.92041	22.1	4	0.950138	0.95372	0.862041	1.01005	0.943987	1.07112	0.935244	1.11248	1.08149	1.05008	0.079781
M1C4S4	Uncharacterized protein OS=Solanum tuberosum GN=PGSC0003DMG400023264 PE=3 SV=1 - [M1C4S4_SOLTU]	62.5272	7.57666	9.92	1	0.96514	0.946006	0.925699	1.04105	0.969473	1.02327	1.02385	1.03888	1.04811	1.03353	0.0810451
M1CA02	Uncharacterized protein OS=Solanum tuberosum GN=PGSC0003DMG400024531 PE=4 SV=1 - [M1CA02_SOLTU]	24.4573	7.35693	11.01	1	0.997362	0.996675	1.17714	1.09864	1.06745	1.00797	0.954674	0.857457	0.983938	0.951009	0.0811257
K4B5N9	Uncharacterized protein OS=Solanum lycopersicum GN=Solyc02g032960.2 PE=4 SV=1 - [K4B5N9_SOLLC]	128.596	9.05615	1.08	1	0.7789	0.81232	0.950631	1.05697	0.899704	1.07375	1.38836	0.987987	1.07745	1.13189	0.0812889
K4B7W0	Uncharacterized protein OS=Solanum lycopersicum GN=Solyc02g069780.2 PE=4 SV=1 - [K4B7W0_SOLLC]	86.961	4.7417	1.66	1	1.04681	0.975953	1.17735	1.06759	1.06693	0.893108	1.03866	0.984504	0.875623	0.947975	0.0813062
B7S5L1	Methionine-R-sulfoxide reductase B2 protein OS=Capsicum annuum GN=MsrB2 PE=2 SV=1 - [B7S5L1_CAPAN]	19.9098	8.82178	14.44	2	1.05972	0.927155	0.852625	0.953277	0.948194	1.0826	0.995507	1.09504	1.05075	1.05597	0.0818078
M1AM55	Uncharacterized protein OS=Solanum tuberosum GN=PGSC0003DMG400009976 PE=4 SV=1 - [M1AM55_SOLTU]	33.2893	5.2749	3.03	1	1.22707	0.919457	1.175	1.04777	1.09232	0.898162	0.997902	0.876133	0.908608	0.920201	0.0821126
E5RPJ4	Malic enzyme (Fragment) OS=Nicotiana benthamiana GN=NADP-ME PE=1 SV=1 - [E5RPJ4_NICBE]	58.7403	5.50342	10.71	2	1.03058	0.915036	1.00188	0.898882	0.961596	1.04047	0.997254	1.03887	1.10454	1.04529	0.0821488
K4D2Y1	Uncharacterized protein OS=Solanum lycopersicum GN=Solyc10g080940.1 PE=3 SV=1 - [K4D2Y1_SOLLC]	50.9261	4.86865	50	3	0.94018	0.952328	0.974992	0.889835	0.939334	0.932227	1.10005	1.03435	1.13849	1.05128	0.083753
M1D7M9	Uncharacterized protein OS=Solanum tuberosum GN=PGSC0003DMG400033902 PE=4 SV=1 - [M1D7M9_SOLTU]	16.7457	9.14404	21.69	2	1.11045	1.15393	0.921265	1.08254	1.06705	0.904143	0.920789	0.925515	1.01481	0.941314	0.0846188
K4CDQ8	Uncharacterized protein OS=Solanum lycopersicum GN=Solyc07g039320.2 PE=4 SV=1 - [K4CDQ8_SOLLC]	17.1879	9.5835	9.87	1	0.915428	0.995165	0.977073	0.923824	0.952872	0.952203	1.07835	1.03536	1.14442	1.05258	0.0846763
M1AKA7	Uncharacterized protein OS=Solanum tuberosum GN=PGSC0003DMG400009484 PE=4 SV=1 - [M1AKA7_SOLTU]	85.1168	7.84033	1.16	1	0.815297	0.843922	1.0534	0.919832	0.908113	1.36875	0.98416	1.0038	1.17414	1.13271	0.0847809
M1B8K3	Uncharacterized protein OS=Solanum tuberosum GN=PGSC0003DMG400015331 PE=4 SV=1 - [M1B8K3_SOLTU]	36.4431	5.8208	4.6	2	0.991579	1.1763	1.00593	1.05467	1.05712	1.0385	0.906053	0.916739	0.934405	0.948925	0.0863654
M0ZQP2	Uncharacterized protein OS=Solanum tuberosum GN=PGSC0003DMG400002336 PE=4 SV=1 - [M0ZQP2_SOLTU]	22.6375	5.85889	6.9	1	0.859006	0.873624	1.06621	0.968473	0.941829	1.06307	1.23315	0.98627	1.06493	1.08685	0.0869665
M1ANR5	Uncharacterized protein OS=Solanum tuberosum GN=PGSC0003DMG400010351 PE=4 SV=1 - [M1ANR5_SOLTU]	159.291	6.69775	2.98	3	1.07122	1.02823	1.07002	0.96939	1.03472	0.986299	0.999144	0.950698	0.968562	0.976176	0.0870338
K4BGM2	Uncharacterized protein OS=Solanum lycopersicum GN=Solyc03g058190.2 PE=4 SV=1 - [K4BGM2_SOLLC]	74.2183	6.7124	6.85	3	1.0518	0.937902	1.22136	1.13438	1.08636	0.833494	1.0391	0.915917	0.943506	0.933004	0.0882965
M1CMR9	Uncharacterized protein OS=Solanum tuberosum GN=PGSC0003DMG400027535 PE=4 SV=1 - [M1CMR9_SOLTU]	8.94901	10.3599	46.91	2	0.901955	1.04898	0.82465	0.955712	0.932825	1.09312	0.948392	1.09796	1.07686	1.05408	0.089305
K7XJE4	Ribulose bisphosphate carboxylase large chain (Fragment) OS=Solanum trilobatum GN=rbcL PE=3 SV=1 - [K7XJE4_9SOLN]	2.54614	4.28467	77.27	2	1.02691	0.98746	0.98741	1.08466	1.02161	0.990523	0.932369	0.998808	0.912688	0.958597	0.091193
M1C6A5	Uncharacterized protein OS=Solanum tuberosum GN=PGSC0003DMG400023609 PE=4 SV=1 - [M1C6A5_SOLTU]	25.6153	10.1548	7.42	1	0.870099	1.04789	0.804193	0.963034	0.921303	1.10128	0.935895	1.20746	1.06244	1.07677	0.0913546
K4CWN7	Uncharacterized protein OS=Solanum lycopersicum GN=Solyc09g092110.2 PE=4 SV=1 - [K4CWN7_SOLLC]	14.1008	4.90674	6.98	1	0.976146	1.00289	0.852274	0.866575	0.924471	1.31545	1.05454	1.05933	0.977855	1.10179	0.091541
M1ACR9	Uncharacterized protein OS=Solanum tuberosum GN=PGSC0003DMG400007705 PE=3 SV=1 - [M1ACR9_SOLTU]	17.277	10.1401	9.03	1	0.910267	1.03743	0.838034	0.948482	0.933552	0.990553	0.973865	1.1061	1.17857	1.06227	0.0919985
M1BCZ3	Uncharacterized protein OS=Solanum tuberosum GN=PGSC0003DMG400016442 PE=3 SV=1 - [M1BCZ3_SOLTU]	55.5859	7.31299	5.48	3	0.97292	0.99852	0.863217	0.948383	0.94576	0.936591	1.06731	1.06674	1.15277	1.05585	0.0921479
Q04130	Glycine-rich protein (Fragment) OS=Solanum lycopersicum PE=1 SV=1 - [Q04130_SOLLC]	7.32719	9.979	40.24	1	1.0108	1.20871	0.991649	1.09714	1.07708	1.00578	0.938784	0.929846	0.962998	0.959351	0.0932555
K4CIQ0	Uncharacterized protein OS=Solanum lycopersicum GN=Solyc08g007630.1 PE=4 SV=1 - [K4CIQ0_SOLLC]	112.532	6.48096	1.01	1	1.08823	1.12445	0.944086	1.03293	1.04742	0.905575	0.891189	0.963215	1.0271	0.946769	0.0933152
C9DFB9	Heat shock protein 70-like protein (Fragment) OS=Nicotiana benthamiana GN=HSP70 PE=1 SV=1 - [C9DFB9_NICBE]	19.6001	6.56592	40	1	1.09559	0.995122	1.0723	1.04442	1.05186	1.02962	1.01454	0.912868	0.858591	0.953904	0.093782
M1B437	Uncharacterized protein OS=Solanum tuberosum GN=PGSC0003DMG400014158 PE=4 SV=1 - [M1B437_SOLTU]	32.6177	7.32764	3.36	1	1.04164	1.01701	1.00262	1.14149	1.05069	0.891703	0.989931	0.889652	1.041	0.953072	0.0942175
M1AEE2	Uncharacterized protein OS=Solanum tuberosum GN=PGSC0003DMG400008122 PE=4 SV=1 - [M1AEE2_SOLTU]	26.0775	7.37158	4.17	1	0.96783	0.952309	0.906575	1.03455	0.965316	0.980483	1.01193	1.07205	1.08551	1.03749	0.0942184
M1A0X2	Uncharacterized protein OS=Solanum tuberosum GN=PGSC0003DMG400004791 PE=3 SV=1 - [M1A0X2_SOLTU]	43.5674	6.80029	9.82	5	1.06094	1.03497	0.973236	1.04866	1.02945	0.897055	0.942743	1.03457	0.962381	0.959188	0.0950052
K4BT15	Uncharacterized protein OS=Solanum lycopersicum GN=Solyc04g063230.2 PE=4 SV=1 - [K4BT15_SOLLC]	45.5522	5.75732	2.94	1	0.989251	1.02766	1.19541	1.10379	1.07903	1.09052	0.913294	0.88075	0.911478	0.949011	0.0963508
M1CTP6	Uncharacterized protein OS=Solanum tuberosum GN=PGSC0003DMG400028931 PE=4 SV=1 - [M1CTP6_SOLTU]	30.677	5.85889	19.08	2	1.06694	1.11854	0.996255	0.988896	1.04266	0.918686	0.92905	1.03953	0.958455	0.96143	0.0968542
K4CLQ5	Phospholipase D OS=Solanum lycopersicum GN=PLDa2 PE=3 SV=1 - [K4CLQ5_SOLLC]	85.8435	6.80029	4.95	3	1.01285	1.02547	1.01438	1.0451	1.02445	0.93115	0.91689	0.983411	1.028	0.964863	0.097233
Q2VCJ2	Ribosomal protein L3-like OS=Solanum tuberosum GN=PGSC0003DMG400029760 PE=2 SV=1 - [Q2VCJ2_SOLTU]	44.3358	10.0815	38.82	6	0.934272	0.94818	0.854148	1.02019	0.939198	1.04984	0.931113	1.15675	1.08153	1.05481	0.0977751
M1D6K2	Uncharacterized protein OS=Solanum tuberosum GN=PGSC0003DMG400033072 PE=4 SV=1 - [M1D6K2_SOLTU]	61.4187	7.25439	8.66	5	1.0043	1.01256	1.01568	1.05081	1.02084	0.980528	0.936961	0.991034	1.01658	0.981276	0.0984614
M1AQP4	Uncharacterized protein OS=Solanum tuberosum GN=PGSC0003DMG400010831 PE=4 SV=1 - [M1AQP4_SOLTU]	9.66314	6.04932	14.77	1	1.03415	1.00004	1.16837	1.06901	1.06789	1.00758	1.05043	0.906273	0.866129	0.957604	0.0988757
M0ZPM8	Uncharacterized protein OS=Solanum tuberosum GN=PGSC0003DMG400002061 PE=4 SV=1 - [M0ZPM8_SOLTU]	31.31	5.42725	26.22	1	0.971493	0.942142	1.01694	0.972765	0.975835	0.980735	1.10139	1.00864	1.08013	1.04272	0.0997318
O24144	Caffeoyl-CoA O-methyltransferase 1 OS=Nicotiana tabacum GN=CCOAOMT1 PE=1 SV=1 - [CAMT1_TOBAC]	26.9478	5.65576	10.04	1	1.19003	0.930331	1.1974	1.04662	1.0911	0.936515	0.976829	0.760427	1.0225	0.924068	0.100039
I7GV89	Ribulose bisphosphate carboxylase large chain (Fragment) OS=Capsicum sp. KIBR KC522 GN=rbcL PE=3 SV=1 - [I7GV89_9SOLA]	26.1215	5.61768	13.6	1	1.05208	0.922923	1.15061	1.13964	1.06631	0.885643	0.98862	0.985119	0.918577	0.94449	0.100247
M1AT63	Uncharacterized protein OS=Solanum tuberosum GN=PGSC0003DMG400011395 PE=4 SV=1 - [M1AT63_SOLTU]	92.9823	5.98584	4.47	3	1.03789	0.984784	1.04602	1.11682	1.04638	0.979157	1.02327	0.988173	0.936959	0.981889	0.101406
M1B8A2	Uncharacterized protein OS=Solanum tuberosum GN=PGSC0003DMG400015249 PE=3 SV=1 - [M1B8A2_SOLTU]	24.3954	5.0083	7.39	1	0.902628	0.887592	0.890008	1.05387	0.933523	1.14172	1.23632	0.985573	0.972199	1.08395	0.101731
P49214	40S ribosomal protein S9 (Fragment) OS=Nicotiana tabacum GN=RPS9 PE=3 SV=1 - [RS9_TOBAC]	8.55157	10.6235	14.29	1	0.923272	0.898525	1.071	0.826619	0.929854	1.0116	1.07328	1.06194	1.04451	1.04783	0.101889
K4D180	Triosephosphate isomerase OS=Solanum lycopersicum GN=Solyc10g054870.1 PE=3 SV=1 - [K4D180_SOLLC]	33.2628	6.68311	26.28	2	0.99439	1.02707	1.02262	1.01183	1.01398	0.963584	1.01599	0.983389	0.989841	0.988201	0.102139
Q6SYB9	S-adenosylmethionine synthase 2 OS=Nicotiana tabacum GN=SAMS2 PE=1 SV=1 - [METK2_TOBAC]	29.5243	8.01611	29.63	1	1.03154	1.16428	0.90651	1.26999	1.09308	0.863405	0.843626	0.791796	1.0827	0.895381	0.102307
B0FFR0	NAD(P)H-quinone oxidoreductase (Fragment) OS=Solanum tuberosum GN=ndhJ PE=3 SV=1 - [B0FFR0_SOLTU]	14.6953	6.16357	11.29	1	1.05913	0.990826	0.973918	1.12602	1.03747	0.975649	0.991783	0.967798	0.878694	0.953481	0.103608
O24136	CP12 OS=Nicotiana tabacum GN=CP12 PE=2 SV=1 - [O24136_TOBAC]	14.297	5.17334	23.48	4	1.14768	1.05481	1.01454	1.06484	1.07047	1.09584	0.957187	0.869276	0.877441	0.949935	0.103898
K4B503	Uncharacterized protein OS=Solanum lycopersicum GN=Solyc02g021550.2 PE=3 SV=1 - [K4B503_SOLLC]	14.0306	5.0083	8.8	1	1.0702	1.13128	0.946372	1.03322	1.04527	0.884684	0.97282	0.927292	1.02045	0.951312	0.104304
Q2V995	Cytoplasmic ribosomal protein S13-like OS=Solanum tuberosum GN=PGSC0003DMG400009588 PE=2 SV=1 - [Q2V995_SOLTU]	17.0505	10.3892	51.66	7	0.938373	1.06142	0.927941	0.928022	0.963938	1.05585	1.00553	1.13413	1.0029	1.0496	0.104369
M0ZLG3	Aldose 1-epimerase OS=Solanum tuberosum GN=PGSC0003DMG400001317 PE=3 SV=1 - [M0ZLG3_SOLTU]	39.4475	9.0415	3.36	1	1.02146	0.803565	0.81708	0.916528	0.889659	1.17349	0.874404	1.06204	1.34208	1.113	0.105561
Q4W5U7	Calnexin-like protein OS=Solanum lycopersicum GN=LeCNX61.0 PE=2 SV=1 - [Q4W5U7_SOLLC]	47.5416	4.62744	4.55	1	0.980708	0.964954	0.894486	1.03426	0.968603	1.0073	1.00327	1.05669	1.07425	1.03538	0.105647
E2FAT3	COSII_At5g14320 (Fragment) OS=Solanum mochiquense PE=4 SV=1 - [E2FAT3_9SOLN]	6.45332	10.1694	61.67	1	0.878839	0.874838	1.08141	0.955073	0.94754	0.960054	1.14745	1.11114	1.05498	1.0684	0.105836
M1B077	Uncharacterized protein OS=Solanum tuberosum GN=PGSC0003DMG400013127 PE=4 SV=1 - [M1B077_SOLTU]	7.10158	9.49561	37.5	2	0.96634	0.97015	0.935118	0.857279	0.932222	1.03035	0.931453	1.15178	1.02938	1.03574	0.106098
M1A1D0	Uncharacterized protein OS=Solanum tuberosum GN=PGSC0003DMG400004889 PE=4 SV=1 - [M1A1D0_SOLTU]	16.0819	5.51611	9.46	1	1.09071	1.05072	0.993047	1.03361	1.04202	1.05246	0.980542	0.922106	0.936859	0.972993	0.106342
M1C1T4	Uncharacterized protein OS=Solanum tuberosum GN=PGSC0003DMG400022472 PE=4 SV=1 - [M1C1T4_SOLTU]	42.3889	9.14404	5.4	2	1.00278	0.953978	0.93658	1.00464	0.974496	0.977684	1.00518	1.07394	1.05822	1.02875	0.107374
M0ZT33	Uncharacterized protein OS=Solanum tuberosum GN=PGSC0003DMG400002891 PE=4 SV=1 - [M0ZT33_SOLTU]	26.4495	6.17627	3.06	1	0.971753	1.12739	0.996449	1.06869	1.04107	0.939945	0.926594	0.978217	1.00198	0.961684	0.108201
K4BGW5	Uncharacterized protein OS=Solanum lycopersicum GN=Solyc03g059180.2 PE=4 SV=1 - [K4BGW5_SOLLC]	57.8117	5.2749	2.25	1	0.946783	0.880444	0.912435	1.09135	0.957754	1.11482	1.08776	1.03466	1.01248	1.06243	0.108216
Q308A3	60S ribosomal protein L18a OS=Solanum tuberosum GN=PGSC0003DMG400030153 PE=2 SV=1 - [Q308A3_SOLTU]	21.4444	10.228	34.83	1	0.90534	1.01152	0.968958	0.912483	0.949576	1.04541	0.94586	1.04436	1.15951	1.04879	0.108487
M0ZKK1	Histone H2A OS=Solanum tuberosum GN=PGSC0003DMG400001065 PE=3 SV=1 - [M0ZKK1_SOLTU]	14.484	10.2134	29.63	3	0.998519	1.00982	0.854722	0.947008	0.952517	1.09626	0.96733	1.1447	1.00734	1.05391	0.109203
M0ZVT8	Uncharacterized protein OS=Solanum tuberosum GN=PGSC0003DMG400003582 PE=3 SV=1 - [M0ZVT8_SOLTU]	47.8236	7.7085	2.51	1	1.03012	1.13113	0.950084	1.13882	1.06254	0.802945	0.954303	0.887375	1.0653	0.927481	0.109213
M1D1D4	Uncharacterized protein OS=Solanum tuberosum GN=PGSC0003DMG402030816 PE=3 SV=1 - [M1D1D4_SOLTU]	17.4867	5.5415	8.33	1	0.929585	0.994666	0.927248	0.958591	0.952523	1.0513	0.933266	1.15111	1.07557	1.05281	0.109252
K4CGL2	Uncharacterized protein OS=Solanum lycopersicum GN=Solyc07g061790.2 PE=4 SV=1 - [K4CGL2_SOLLC]	25.8329	7.72314	4.37	1	1.16565	1.10364	0.987749	0.998093	1.06378	1.05078	0.861854	0.99546	0.871683	0.944944	0.109888
M1AW51	Uncharacterized protein OS=Solanum tuberosum GN=PGSC0003DMG400012174 PE=4 SV=1 - [M1AW51_SOLTU]	75.722	6.50732	3.5	2	1.02701	1.1043	1.11055	0.942822	1.04617	0.863149	0.972442	0.958235	1.01094	0.951191	0.11047
M1D1L1	Uncharacterized protein OS=Solanum tuberosum GN=PGSC0003DMG400030867 PE=4 SV=1 - [M1D1L1_SOLTU]	6.88049	8.49951	13.33	1	1.12278	1.3991	0.971445	1.02616	1.12987	1.0477	1.02803	0.75397	0.732168	0.890469	0.110549
K4BTH7	Uncharacterized protein OS=Solanum lycopersicum GN=Solyc04g071900.2 PE=3 SV=1 - [K4BTH7_SOLLC]	38.8685	7.66455	5.98	2	0.944218	0.924466	0.93447	0.975937	0.944773	0.970217	1.03212	0.954042	1.0814	1.00944	0.110773
M1D7P8	ATP-dependent Clp protease proteolytic subunit OS=Solanum tuberosum GN=PGSC0003DMG400033910 PE=3 SV=1 - [M1D7P8_SOLTU]	29.56	8.44092	3.27	1	0.96424	0.947551	0.963787	0.99952	0.968775	0.975139	1.05371	1.00444	1.11855	1.03796	0.111018
M1ARW1	Uncharacterized protein OS=Solanum tuberosum GN=PGSC0003DMG400011132 PE=3 SV=1 - [M1ARW1_SOLTU]	53.0974	7.15186	19.76	3	1.03562	1.03408	1.07683	1.06454	1.05277	1.03297	1.00766	0.968039	0.855114	0.965946	0.111082
M1A5C6	Ribosomal protein OS=Solanum tuberosum GN=PGSC0003DMG401005881 PE=3 SV=1 - [M1A5C6_SOLTU]	24.5623	9.86182	7.41	2	1.00915	1.00604	0.800209	0.964728	0.945032	1.07577	0.991718	1.02011	1.15785	1.06136	0.111127
K4BZT0	Uncharacterized protein OS=Solanum lycopersicum GN=Solyc05g024430.2 PE=4 SV=1 - [K4BZT0_SOLLC]	12.7337	9.53955	7.83	1	1.08325	1.28393	0.950513	1.07136	1.09727	1.11361	0.877217	0.864848	0.820221	0.918973	0.111396
K4DHW5	Uncharacterized protein OS=Solanum lycopersicum GN=Solyc12g099440.1 PE=3 SV=1 - [K4DHW5_SOLLC]	45.9659	7.94287	4.76	2	0.993312	0.975648	0.92254	1.04449	0.983998	1.07055	0.984398	1.06388	1.05934	1.04454	0.111838
M0ZPS9	Uncharacterized protein OS=Solanum tuberosum GN=PGSC0003DMG400002099 PE=3 SV=1 - [M0ZPS9_SOLTU]	30.3089	9.49561	10.58	3	1.00541	1.10783	1.0901	0.952187	1.03888	0.968002	1.00989	0.882015	0.953648	0.95339	0.111994
K4CVS3	Pyruvate kinase OS=Solanum lycopersicum GN=Solyc09g082970.2 PE=3 SV=1 - [K4CVS3_SOLLC]	58.2467	5.75732	7.13	1	0.957914	0.927718	0.994513	1.04358	0.980932	1.04739	1.06186	1.00598	1.0287	1.03598	0.112575
M1D4K6	Ribosomal protein L19 OS=Solanum tuberosum GN=PGSC0003DMG400031796 PE=3 SV=1 - [M1D4K6_SOLTU]	25.2811	11.5024	14.09	4	0.909058	1.05792	0.907364	0.909678	0.946006	1.01991	0.949903	1.15056	1.09071	1.05277	0.112724
M1AZN8	Uncharacterized protein OS=Solanum tuberosum GN=PGSC0003DMG400012982 PE=4 SV=1 - [M1AZN8_SOLTU]	109.429	6.55127	1.02	1	1.00141	0.814535	0.915898	1.03467	0.94163	0.946174	1.16026	1.08845	1.0636	1.06462	0.113601
M1C3U7	Uncharacterized protein OS=Solanum tuberosum GN=PGSC0003DMG400022967 PE=3 SV=1 - [M1C3U7_SOLTU]	41.6977	7.59131	5.21	2	0.953261	1.07134	1.02537	1.11986	1.04246	1.00986	0.917421	0.9608	0.968248	0.964082	0.113809
K4CB09	Uncharacterized protein OS=Solanum lycopersicum GN=Solyc07g005370.2 PE=4 SV=1 - [K4CB09_SOLLC]	16.7597	4.79248	4.7	1	1.05818	0.98047	1.04131	1.13945	1.05485	1.03457	0.921894	1.01588	0.902769	0.968779	0.113851
K4BUQ7	Uncharacterized protein OS=Solanum lycopersicum GN=Solyc04g078200.2 PE=4 SV=1 - [K4BUQ7_SOLLC]	7.18023	8.5874	10.77	1	0.979362	1.19705	1.23188	0.948028	1.08908	0.98648	0.914214	0.955629	0.865287	0.930402	0.114731
C6KH60	3-ketoacyl-CoA synthase OS=Solanum lycopersicum PE=3 SV=1 - [C6KH60_SOLLC]	47.3516	9.0415	5.95	1	1.07321	0.989652	1.16985	0.988207	1.05523	0.906058	1.03541	0.946562	0.94502	0.958264	0.114857
M1CCA0	Uncharacterized protein OS=Solanum tuberosum GN=PGSC0003DMG400025015 PE=4 SV=1 - [M1CCA0_SOLTU]	28.1538	10.814	24.62	2	0.915655	1.04414	0.912647	0.873062	0.936376	1.00503	1.0908	1.10622	0.940026	1.03552	0.11495
K4BBZ1	Uncharacterized protein OS=Solanum lycopersicum GN=Solyc02g088350.2 PE=4 SV=1 - [K4BBZ1_SOLLC]	45.6668	6.03662	7.82	3	1.07275	1.04686	1.03334	0.981303	1.03356	1.04878	0.922382	0.971997	0.909799	0.963239	0.115628
M1BCZ9	Uncharacterized protein OS=Solanum tuberosum GN=PGSC0003DMG400016448 PE=4 SV=1 - [M1BCZ9_SOLTU]	32.7907	5.61768	6.51	2	0.92709	0.90393	0.907683	1.02992	0.942157	0.98059	0.959535	1.05069	1.08126	1.01802	0.115932
B5LAS7	Putative acetyl co-enzyme A carboxylase biotin carboxylase subunit OS=Capsicum annuum PE=2 SV=1 - [B5LAS7_CAPAN]	58.4068	7.06396	20.52	9	0.946019	0.960594	0.962518	1.042	0.977782	1.01671	1.02533	1.01866	1.03875	1.02486	0.116412
K4CW20	Uncharacterized protein OS=Solanum lycopersicum GN=Solyc09g089940.1 PE=4 SV=1 - [K4CW20_SOLLC]	72.0357	6.354	1.26	1	1.10354	1.07292	1.04011	0.986574	1.05079	1.00807	1.04227	0.940785	0.872576	0.965925	0.116468
M1AGW8	Uncharacterized protein OS=Solanum tuberosum GN=PGSC0003DMG400008740 PE=4 SV=1 - [M1AGW8_SOLTU]	107.091	6.88818	18.45	5	0.999945	0.914863	1.04745	0.981971	0.986057	1.00616	1.15642	1.0624	1.03367	1.06466	0.116526
K4BS22	Uncharacterized protein OS=Solanum lycopersicum GN=Solyc04g050520.2 PE=4 SV=1 - [K4BS22_SOLLC]	147.633	7.44482	1.04	1	1.01825	1.00226	1.09299	1.00493	1.02961	0.98442	0.972099	0.994873	0.981626	0.983255	0.116893
M1C4Z7	Uncharacterized protein OS=Solanum tuberosum GN=PGSC0003DMG400023334 PE=3 SV=1 - [M1C4Z7_SOLTU]	49.6546	6.25244	11.06	4	1.04046	0.987889	1.00231	1.14238	1.04326	0.968905	0.924126	1.01817	0.955973	0.966793	0.117307
M0ZMB0	Uncharacterized protein OS=Solanum tuberosum GN=PGSC0003DMG400001495 PE=4 SV=1 - [M0ZMB0_SOLTU]	43.1676	4.86865	8.21	3	0.949351	0.964517	0.912355	0.995615	0.95546	0.939091	1.05844	1.02652	1.11409	1.03454	0.117877
J7EPI5	Methylenetetrahydrofolate reductase OS=Nicotiana tomentosiformis PE=2 SV=1 - [J7EPI5_NICTO]	67.4209	5.8208	9.92	6	1.01149	1.06947	0.992145	1.08972	1.0407	1.03923	0.937224	0.92624	1.0009	0.9759	0.117908
M1AE33	Uncharacterized protein OS=Solanum tuberosum GN=PGSC0003DMG400008050 PE=3 SV=1 - [M1AE33_SOLTU]	82.0372	6.15088	5.41	4	0.996991	0.98528	1.1231	1.05998	1.04134	0.976675	1.02835	0.957244	0.876948	0.959803	0.118083
M1CJJ3	Uncharacterized protein OS=Solanum tuberosum GN=PGSC0003DMG401026767 PE=4 SV=1 - [M1CJJ3_SOLTU]	68.4041	6.11279	7.28	1	1.15023	1.08077	1.04321	1.0677	1.08548	1.13563	0.924167	0.873281	0.869973	0.950763	0.118359
K4D1U4	Uncharacterized protein OS=Solanum lycopersicum GN=Solyc10g075020.1 PE=3 SV=1 - [K4D1U4_SOLLC]	25.2709	8.104	4.8	1	0.84467	0.85789	0.891359	1.12605	0.929991	0.96097	1.09635	1.12649	1.11583	1.07491	0.118714
K4ATA6	Uncharacterized protein OS=Solanum lycopersicum GN=Solyc01g009100.2 PE=3 SV=1 - [K4ATA6_SOLLC]	12.3525	9.5542	42.86	1	0.955932	0.920794	1.01196	0.878729	0.941854	0.895224	1.13056	1.1051	1.20368	1.08364	0.119121
M1B7H0	Peptidyl-prolyl cis-trans isomerase OS=Solanum tuberosum GN=PGSC0003DMG400015011 PE=4 SV=1 - [M1B7H0_SOLTU]	25.4971	7.79639	15.74	3	1.08767	1.08207	1.00429	1.00649	1.04513	0.972561	0.992452	1.03765	0.880921	0.970895	0.119866
K4DFV6	Uncharacterized protein OS=Solanum lycopersicum GN=Solyc12g056250.1 PE=4 SV=1 - [K4DFV6_SOLLC]	26.5417	6.53662	6.78	2	1.05331	1.0387	0.951239	1.14103	1.04607	0.897078	0.926914	0.941734	1.0481	0.953457	0.120071
M1BNJ2	Uncharacterized protein OS=Solanum tuberosum GN=PGSC0003DMG400019163 PE=3 SV=1 - [M1BNJ2_SOLTU]	65.6623	6.84424	11.13	5	0.969594	0.970568	1.01663	1.00057	0.98934	1.13491	1.02858	1.05846	0.992834	1.0537	0.120096
M1BLM4	Uncharacterized protein OS=Solanum tuberosum GN=PGSC0003DMG400018622 PE=4 SV=1 - [M1BLM4_SOLTU]	53.3142	7.04932	29.38	8	1.04576	1.07644	1.11289	1.07408	1.07729	1.07748	0.996286	0.915675	0.78201	0.942863	0.120394
F1AG89	Granule-bound starch synthase (Fragment) OS=Solanum megalonyx GN=GBSSI PE=4 SV=1 - [F1AG89_9SOLN]	3.59499	9.24658	74.19	2	0.980562	0.980907	1.07732	1.13254	1.04283	0.955571	0.945235	1.01549	0.93348	0.962443	0.121071
M0ZGQ9	Uncharacterized protein OS=Solanum tuberosum GN=PGSC0003DMG400000152 PE=3 SV=1 - [M0ZGQ9_SOLTU]	39.8079	8.76318	2.18	1	0.951305	0.92012	1.00605	0.987348	0.966205	1.04662	0.970225	1.01819	1.14334	1.04459	0.121425
M1CLD2	Uncharacterized protein OS=Solanum tuberosum GN=PGSC0003DMG402027186 PE=4 SV=1 - [M1CLD2_SOLTU]	12.9238	10.4331	24.11	1	0.958647	0.913301	0.936229	1.0215	0.957419	1.06066	0.927207	1.12349	1.08691	1.04957	0.121589
K7VP97	Hydroxyacylglutathione hydrolase OS=Solanum tuberosum PE=2 SV=1 - [K7VP97_SOLTU]	22.1325	6.80029	10.15	1	0.92584	0.85605	0.789836	1.13068	0.925602	1.13171	1.042	1.19364	0.982626	1.08749	0.122213
K4BCT7	Uncharacterized protein OS=Solanum lycopersicum GN=Solyc02g091390.2 PE=4 SV=1 - [K4BCT7_SOLLC]	64.4523	5.18604	2.25	1	0.931705	1.07795	1.23584	1.06793	1.07836	0.929239	1.03521	0.85043	0.956087	0.942741	0.122393
K4CUE5	Uncharacterized protein OS=Solanum lycopersicum GN=LOC544217 PE=4 SV=1 - [K4CUE5_SOLLC]	43.8873	7.54736	17.69	3	0.996226	0.98702	1.11332	1.03114	1.03192	0.980402	1.015	0.961739	0.888775	0.961479	0.122609
M1CK17	60S ribosomal protein L27 OS=Solanum tuberosum GN=PGSC0003DMG400026911 PE=3 SV=1 - [M1CK17_SOLTU]	13.6607	10.2427	27.5	3	0.976219	0.978111	0.956619	0.952193	0.965785	1.04777	0.948614	1.11796	1.04337	1.03943	0.122691
M1CS94	Uncharacterized protein OS=Solanum tuberosum GN=PGSC0003DMG401028577 PE=3 SV=1 - [M1CS94_SOLTU]	43.8356	7.84033	1.55	1	1.10112	0.920321	1.1467	1.12347	1.0729	0.986996	0.894258	1.0606	0.828904	0.942689	0.123024
Q3HRZ3	Uncharacterized protein OS=Solanum tuberosum GN=PGSC0003DMG400025324 PE=2 SV=1 - [Q3HRZ3_SOLTU]	14.7809	9.89111	34.62	5	0.936617	1.02785	0.875393	0.988313	0.957043	1.00097	0.977407	1.0733	1.07895	1.03266	0.123222
M1BNN4	Uncharacterized protein OS=Solanum tuberosum GN=PGSC0003DMG400019189 PE=3 SV=1 - [M1BNN4_SOLTU]	45.0909	6.96143	18.63	1	0.964497	0.89081	0.99688	0.939075	0.947816	1.07148	1.18943	0.911542	1.11155	1.071	0.123293
K4C4K3	Uncharacterized protein OS=Solanum lycopersicum GN=Solyc06g033790.1 PE=4 SV=1 - [K4C4K3_SOLLC]	10.125	5.26221	7.53	1	1.2311	1.03712	1.11274	0.904151	1.07128	0.991847	0.991323	0.848439	0.863974	0.923896	0.123683
M1CSR8	Peptidyl-prolyl cis-trans isomerase OS=Solanum tuberosum GN=PGSC0003DMG400028689 PE=3 SV=1 - [M1CSR8_SOLTU]	18.8354	7.81104	8	1	0.97163	0.965882	0.845914	0.905933	0.92234	1.11123	0.865416	1.20319	1.12363	1.07586	0.123966
M1CQ13	Uncharacterized protein OS=Solanum tuberosum GN=PGSC0003DMG400028134 PE=4 SV=1 - [M1CQ13_SOLTU]	109.785	5.80811	2.54	2	1.08146	1.08594	1.03939	0.945374	1.03804	0.910392	0.906417	1.04025	0.971507	0.957141	0.124516
K4BMT2	Uncharacterized protein OS=Solanum lycopersicum GN=Solyc03g121330.2 PE=4 SV=1 - [K4BMT2_SOLLC]	15.9337	10.521	29.37	1	0.919884	1.05875	0.842086	0.902838	0.93089	1.04832	0.913914	1.16348	1.09876	1.05612	0.124773
P10707	Chlorophyll a-b binding protein 1D (Fragment) OS=Solanum lycopersicum GN=CAB1D PE=3 SV=1 - [CB2D_SOLLC]	145.568	8.22119	4.23	2	1.00322	1.10101	1.02396	1.12489	1.06327	1.09875	0.95397	0.876217	0.87498	0.95098	0.125069
C5IH21	At2g06530-like protein (Fragment) OS=Solanum quitoense var. quitoense PE=4 SV=1 - [C5IH21_9SOLN]	98.2373	6.56592	2.95	2	1.10251	1.05875	0.932945	1.07418	1.0421	0.986649	0.950856	0.962977	0.953847	0.963582	0.125364
K4CWD1	Uncharacterized protein OS=Solanum lycopersicum GN=Solyc09g091050.2 PE=4 SV=1 - [K4CWD1_SOLLC]	96.261	5.40186	1.04	1	0.917906	0.973555	1.07919	0.852452	0.955776	1.15269	1.15238	0.953446	1.04743	1.07648	0.125439
M1C7W3	Uncharacterized protein OS=Solanum tuberosum GN=PGSC0003DMG400024016 PE=4 SV=1 - [M1C7W3_SOLTU]	65.6049	7.41553	21.55	2	1.0775	1.00476	1.13841	1.08099	1.07542	0.965287	1.07947	0.900272	0.707258	0.913071	0.126032
K4D3P2	Uncharacterized protein OS=Solanum lycopersicum GN=Solyc10g084560.1 PE=4 SV=1 - [K4D3P2_SOLLC]	63.7389	6.63916	3.69	1	1.1013	0.973541	1.07829	1.0324	1.04638	0.830438	0.934398	1.01752	1.018	0.95009	0.126036
M1D6E8	Uncharacterized protein OS=Solanum tuberosum GN=PGSC0003DMG400033037 PE=3 SV=1 - [M1D6E8_SOLTU]	40.2425	7.54736	48.62	2	1.14149	0.99401	1.1343	1.05855	1.08209	1.06991	1.01582	0.822138	0.959119	0.966746	0.127695
M0ZHU7	Uncharacterized protein OS=Solanum tuberosum GN=PGSC0003DMG400000404 PE=4 SV=1 - [M0ZHU7_SOLTU]	39.0183	8.45557	11.56	1	1.00079	0.930022	0.913711	0.963933	0.952114	0.982378	0.990724	1.02216	1.16269	1.03949	0.127769
B3RFK1	Cytochrome P450 monooxygenase OS=Petunia hybrida GN=CYP88C1 PE=2 SV=1 - [B3RFK1_PETHY]	54.9765	8.73389	2.29	1	0.878267	0.779568	1.06777	1.04175	0.94184	1.12007	1.18709	1.00153	1.04138	1.08752	0.128895
Q9S8M0	Chitin-binding lectin 1 OS=Solanum tuberosum PE=1 SV=2 - [LECT_SOLTU]	132.33	7.06396	9.18	11	1.02269	1.03401	0.984295	1.04594	1.02173	0.961891	0.936382	1.0217	1.00093	0.980227	0.131807
M1BZG4	Uncharacterized protein OS=Solanum tuberosum GN=PGSC0003DMG400021933 PE=4 SV=1 - [M1BZG4_SOLTU]	13.6355	4.67822	9.48	1	0.964716	0.860365	1.07641	0.884746	0.946558	1.00042	1.19361	1.02574	1.02621	1.06149	0.132272
K4DHC8	Uncharacterized protein OS=Solanum lycopersicum GN=Solyc12g096550.1 PE=4 SV=1 - [K4DHC8_SOLLC]	62.2026	8.57275	9.16	5	1.07882	0.978106	0.973866	1.04313	1.01848	0.957783	0.916669	1.02916	0.909805	0.953355	0.133369
K4BCZ3	Uncharacterized protein OS=Solanum lycopersicum GN=Solyc02g091950.2 PE=4 SV=1 - [K4BCZ3_SOLLC]	50.6738	5.87158	2.47	1	0.93935	0.9378	1.0484	0.875509	0.950264	1.00998	1.06436	0.957176	1.15155	1.04577	0.133558
P49039	Sucrose synthase OS=Solanum tuberosum PE=3 SV=1 - [SUS2_SOLTU]	92.5189	6.40479	14.66	3	0.932941	1.00311	0.92525	0.911855	0.94329	0.943569	1.11188	0.994275	1.21239	1.06553	0.13356
M1BKV2	Uncharacterized protein OS=Solanum tuberosum GN=PGSC0003DMG400018457 PE=4 SV=1 - [M1BKV2_SOLTU]	89.2042	6.21436	1.01	1	0.974711	1.0693	0.989287	1.11536	1.03716	0.964021	0.914916	1.00981	0.981002	0.967437	0.133695
M1BPW2	Uncharacterized protein OS=Solanum tuberosum GN=PGSC0003DMG400019486 PE=4 SV=1 - [M1BPW2_SOLTU]	26.6939	7.26904	4.47	1	0.972215	1.04376	1.07798	1.1231	1.05426	1.07318	0.918413	0.975579	0.897636	0.966201	0.134246
K7VPG7	60S ribosomal protein L35 OS=Solanum tuberosum GN=rpl35 PE=2 SV=1 - [K7VPG7_SOLTU]	13.9082	10.77	37.5	1	0.937698	1.07726	0.835273	0.877206	0.931858	0.992191	1.01092	1.10895	1.04704	1.03977	0.134411
M1B583	Uncharacterized protein OS=Solanum tuberosum GN=PGSC0003DMG400014405 PE=3 SV=1 - [M1B583_SOLTU]	80.0948	5.03369	30.62	3	1.00141	1.07447	0.958257	1.11055	1.03617	0.955043	0.948464	0.973458	0.988893	0.966465	0.134434
M1AZI7	Uncharacterized protein OS=Solanum tuberosum GN=PGSC0003DMG400012949 PE=4 SV=1 - [M1AZI7_SOLTU]	13.0874	5.12256	7.21	1	1.02984	1.03634	1.01795	1.06887	1.03825	0.898945	1.02821	1.02791	0.914641	0.967426	0.135126
M1A7Z9	Uncharacterized protein OS=Solanum tuberosum GN=PGSC0003DMG400006508 PE=4 SV=1 - [M1A7Z9_SOLTU]	30.1407	5.33838	10.07	3	1.05949	1.02957	0.959559	1.03158	1.02005	0.946315	0.915344	1.04355	0.911949	0.954289	0.135227
Q00081	Glucose-1-phosphate adenylyltransferase large subunit 1 (Fragment) OS=Solanum tuberosum GN=AGPS1 PE=2 SV=1 - [GLGL1_SOLTU]	340.604	7.03467	14.03	12	1.0875	1.0396	0.976439	1.06257	1.04153	1.0386	0.973366	0.993261	0.890968	0.974047	0.137355
Q42891	Lactoylglutathione lyase OS=Solanum lycopersicum GN=GLX1 PE=2 SV=1 - [LGUL_SOLLC]	20.331	5.42725	22.22	5	1.00198	0.982695	0.909487	1.01434	0.977126	1.0401	0.965433	1.08574	1.05452	1.03645	0.138228
M1CKI2	Uncharacterized protein OS=Solanum tuberosum GN=PGSC0003DMG400027010 PE=3 SV=1 - [M1CKI2_SOLTU]	26.5984	10.9312	23.81	2	0.943719	1.03729	0.805234	1.03859	0.956208	1.08323	0.996323	1.06137	1.12842	1.06734	0.138321
M1AC14	Uncharacterized protein OS=Solanum tuberosum GN=PGSC0003DMG400007504 PE=4 SV=1 - [M1AC14_SOLTU]	115.201	5.24951	10.77	12	0.954359	0.963633	0.968042	0.991924	0.969489	1.03373	1.02441	0.990939	0.961647	1.00268	0.138561
E1AXT8	Glycolate oxidase OS=Nicotiana benthamiana GN=GOX PE=2 SV=1 - [E1AXT8_NICBE]	33.6745	6.03662	35.37	4	1.09343	0.937535	1.04246	1.21681	1.07256	0.843637	0.91974	1.09764	0.875548	0.93414	0.138803
K4BK21	Uncharacterized protein OS=Solanum lycopersicum GN=Solyc03g111580.2 PE=4 SV=1 - [K4BK21_SOLLC]	57.2867	5.45264	2.75	1	0.928736	0.973284	0.919227	0.995357	0.954151	1.21353	0.956552	1.00179	1.09537	1.06681	0.139638
M1A6K1	Uncharacterized protein OS=Solanum tuberosum GN=PGSC0003DMG401006167 PE=4 SV=1 - [M1A6K1_SOLTU]	56.1293	8.35303	7.49	1	1.00254	0.854706	0.927133	1.05164	0.959006	1.00873	1.07791	0.996957	1.10945	1.04826	0.139834
Q4A3Y5	Peroxidase POA1 (Fragment) OS=Capsicum annuum GN=poa1 PE=3 SV=1 - [Q4A3Y5_CAPAN]	31.8529	8.11865	10.85	2	0.960626	1.01839	0.987983	0.976389	0.985847	1.01791	1.03258	1.04261	0.977791	1.01773	0.141363
M1CL86	Dihydrolipoyl dehydrogenase OS=Solanum tuberosum GN=PGSC0003DMG400027156 PE=3 SV=1 - [M1CL86_SOLTU]	52.8254	7.34229	21.2	2	1.10171	1.09336	1.00771	0.996882	1.04992	1.02471	0.955385	1.01807	0.822855	0.955254	0.143732
M1AV74	Uncharacterized protein OS=Solanum tuberosum GN=PGSC0003DMG400011914 PE=4 SV=1 - [M1AV74_SOLTU]	46.4588	4.51318	7.26	1	0.970794	1.08129	1.20913	1.0771	1.08458	1.00677	1.0939	0.796515	0.885871	0.945764	0.144208
M1CBF6	Uncharacterized protein OS=Solanum tuberosum GN=PGSC0003DMG400024838 PE=3 SV=1 - [M1CBF6_SOLTU]	30.5434	10.272	29.64	8	0.956656	0.986145	0.854017	0.957153	0.938493	0.991206	0.924444	1.19877	1.14528	1.06493	0.144353
K4BNL0	Uncharacterized protein OS=Solanum lycopersicum GN=Solyc04g007030.2 PE=4 SV=1 - [K4BNL0_SOLLC]	101.673	7.23975	1.24	1	0.858933	0.861731	0.76389	1.16892	0.913368	1.04314	1.03096	1.13551	1.13167	1.08532	0.144508
M1AHP3	Eukaryotic translation initiation factor 3 subunit A OS=Solanum tuberosum GN=PGSC0003DMG400008926 PE=3 SV=1 - [M1AHP3_SOLTU]	116.834	9.0708	7.46	8	0.955593	0.986207	1.0079	1.01141	0.990276	1.05298	0.980768	1.01944	1.07369	1.03172	0.144627
M0ZI96	Uncharacterized protein OS=Solanum tuberosum GN=PGSC0003DMG400000494 PE=4 SV=1 - [M0ZI96_SOLTU]	45.6428	6.91748	11.86	4	1.06093	0.966691	1.09367	1.06535	1.04666	0.982976	1.04259	0.978809	0.857261	0.965409	0.144698
Q07761	60S ribosomal protein L23a OS=Nicotiana tabacum GN=RPL23A PE=2 SV=1 - [RL23A_TOBAC]	13.5186	10.272	15	1	0.913427	1.02469	0.754016	0.97538	0.916879	1.14824	0.880857	1.24091	1.0495	1.07988	0.146999
Q3HRW1	60S ribosomal protein L13a-like protein OS=Solanum tuberosum GN=PGSC0003DMG402015759 PE=2 SV=1 - [Q3HRW1_SOLTU]	23.5301	10.5356	29.13	4	0.938206	1.02521	0.870814	0.979061	0.953323	1.0748	0.938813	1.10289	1.02162	1.03453	0.147098
K4DHI9	Uncharacterized protein OS=Solanum lycopersicum GN=Solyc12g098150.1 PE=4 SV=1 - [K4DHI9_SOLLC]	6.73242	7.23975	11.67	1	1.07258	1.17917	0.943838	0.99692	1.04813	0.959738	0.886273	0.935762	1.00996	0.947932	0.147477
Q9SB88	Annexin OS=Capsicum annuum GN=an.1 PE=3 SV=1 - [Q9SB88_CAPAN]	34.245	6.72705	21	2	1.08426	0.986586	0.986828	1.18214	1.05995	0.760584	0.881474	0.963936	1.07962	0.921403	0.14775
K4CQE3	Uncharacterized protein OS=Solanum lycopersicum GN=Solyc09g007540.2 PE=3 SV=1 - [K4CQE3_SOLLC]	122.531	6.46826	4	4	0.967891	1.02183	0.879015	0.985305	0.96351	0.997702	1.02604	0.994904	1.08396	1.02565	0.147943
M0ZVV7	Uncharacterized protein OS=Solanum tuberosum GN=PGSC0003DMG401003592 PE=4 SV=1 - [M0ZVV7_SOLTU]	15.8308	5.98584	17.73	2	1.0268	0.946573	0.973811	0.925899	0.968271	0.956467	1.12801	1.03086	1.04027	1.0389	0.148165
K4B425	Uncharacterized protein OS=Solanum lycopersicum GN=Solyc01g111630.2 PE=3 SV=1 - [K4B425_SOLLC]	15.607	5.85889	30.14	1	1.11719	0.989536	0.946487	1.24622	1.07486	0.818455	1.01266	0.992934	0.927302	0.937837	0.14821
A0EPI4	ERD15 OS=Capsicum annuum PE=2 SV=1 - [A0EPI4_CAPAN]	18.1659	4.729	9.94	1	0.967973	0.993449	0.92938	0.901138	0.947985	0.969038	1.20222	1.04176	0.987886	1.05023	0.148352
K4B9B8	Uncharacterized protein OS=Solanum lycopersicum GN=Solyc02g078940.2 PE=4 SV=1 - [K4B9B8_SOLLC]	27.9838	8.20654	3.4	1	0.801776	0.918323	1.04128	0.974794	0.934042	1.30947	1.2365	1.00473	0.917824	1.11713	0.148796
M1ARI2	Uncharacterized protein OS=Solanum tuberosum GN=PGSC0003DMG400011039 PE=4 SV=1 - [M1ARI2_SOLTU]	13.738	6.91748	5.83	1	0.985477	1.07	0.968648	1.17348	1.0494	0.962889	0.850042	0.988379	1.005	0.951577	0.149597
K4D054	Uncharacterized protein OS=Solanum lycopersicum GN=Solyc10g047950.1 PE=4 SV=1 - [K4D054_SOLLC]	32.5797	5.98584	11.22	2	0.998054	1.08446	0.966872	1.0344	1.02095	0.992502	0.93347	0.97858	0.981724	0.971569	0.149611
M1CL13	Ferritin OS=Solanum tuberosum GN=PGSC0003DMG400027119 PE=3 SV=1 - [M1CL13_SOLTU]	28.9498	6.53662	13.18	1	1.22806	1.0176	1.05169	0.943072	1.06011	0.800041	0.976303	0.941529	1.0145	0.933094	0.150588
P56336	Eukaryotic translation initiation factor 5A-4 OS=Solanum tuberosum GN=EIF5A4 PE=2 SV=1 - [IF5A4_SOLTU]	17.3076	5.78271	39.62	1	0.984709	0.963796	0.912345	0.977365	0.959554	0.992463	0.968852	1.04545	1.16364	1.0426	0.150957
K4BC78	Uncharacterized protein OS=Solanum lycopersicum GN=Solyc02g089260.2 PE=4 SV=1 - [K4BC78_SOLLC]	565.211	6.22705	0.8	4	1.01496	1.07118	1.16254	0.955624	1.05108	0.967413	1.0126	0.913	0.971688	0.966174	0.151067
M1BJG9	Uncharacterized protein OS=Solanum tuberosum GN=PGSC0003DMG400018130 PE=3 SV=1 - [M1BJG9_SOLTU]	63.3115	7.18115	18	5	0.949493	0.997219	0.996237	0.988683	0.982908	0.963804	1.0314	1.03911	1.05375	1.02202	0.151917
D2KQI9	Mitochondrial succinate dehydrogenase iron sulfur subunit OS=Solanum lycopersicum GN=LOC100736507 PE=2 SV=1 - [D2KQI9_SOLLC]	13.5886	7.18115	13.33	1	0.956357	0.98289	0.961628	0.931441	0.958079	0.984822	1.12731	0.950286	1.14463	1.05176	0.152078
K4BIT4	Uncharacterized protein OS=Solanum lycopersicum GN=Solyc03g094090.2 PE=4 SV=1 - [K4BIT4_SOLLC]	11.9675	4.29736	11.43	1	1.00981	0.911989	0.831981	1.01961	0.943346	0.987482	0.996726	1.02779	1.2019	1.05347	0.152144
K4BZG1	Uncharacterized protein OS=Solanum lycopersicum GN=Solyc05g021110.2 PE=4 SV=1 - [K4BZG1_SOLLC]	13.5582	9.39307	7.5	1	1.1648	1.20907	0.961139	0.925796	1.0652	0.917094	0.886008	0.941942	0.974817	0.929965	0.152416
M1BQI2	Uncharacterized protein OS=Solanum tuberosum GN=PGSC0003DMG400019647 PE=3 SV=1 - [M1BQI2_SOLTU]	90.8568	4.97021	11.17	7	0.989737	1.01564	1.06321	1.05736	1.03149	1.04309	0.992106	0.961001	0.916024	0.978056	0.153179
K4CIT0	Uncharacterized protein OS=Solanum lycopersicum GN=Solyc08g007950.2 PE=4 SV=1 - [K4CIT0_SOLLC]	98.1703	6.354	2.04	2	1.01975	1.05178	0.985052	1.0349	1.02287	0.968472	0.948386	1.0437	0.956164	0.979181	0.153403
K4AWN4	Uncharacterized protein OS=Solanum lycopersicum GN=Solyc01g066310.2 PE=3 SV=1 - [K4AWN4_SOLLC]	91.6347	8.25049	1.45	1	0.942103	0.990689	1.02117	0.911837	0.96645	1.091	1.09621	0.920047	1.10054	1.05195	0.154024
M0ZHK6	Uncharacterized protein OS=Solanum tuberosum GN=PGSC0003DMG400000345 PE=4 SV=1 - [M0ZHK6_SOLTU]	13.8636	9.94971	12.5	2	1.00314	1.039	0.838831	0.940682	0.955413	1.06149	0.944401	1.16083	1.06116	1.05697	0.154183
P38550	DNA-directed RNA polymerase subunit beta'' OS=Nicotiana tabacum GN=rpoC2 PE=3 SV=2 - [RPOC2_TOBAC]	1445.78	9.86182	2.69	7	1.00284	1.10615	0.970407	1.04122	1.03015	1.01183	0.956841	0.991395	0.930171	0.972559	0.154212
K4B0S9	Mitochondrial Rho GTPase OS=Solanum lycopersicum GN=Solyc01g098920.2 PE=3 SV=1 - [K4B0S9_SOLLC]	64.7082	5.38916	2.22	1	1.12878	0.973804	1.14034	0.988146	1.05777	0.853513	0.962581	0.900555	1.08137	0.949506	0.154714
M0ZZV1	Uncharacterized protein OS=Solanum tuberosum GN=PGSC0003DMG401004570 PE=4 SV=1 - [M0ZZV1_SOLTU]	47.012	6.1001	2.63	1	1.00191	1.21352	0.962137	1.04609	1.05592	0.864532	0.918313	0.929714	1.05789	0.942612	0.15481
P41380	Eukaryotic initiation factor 4A-3 OS=Nicotiana plumbaginifolia PE=2 SV=1 - [IF4A3_NICPL]	44.166	5.87158	8.18	2	0.974117	0.991059	1.13337	1.05308	1.03791	0.922676	1.05737	0.925873	0.928013	0.958484	0.155648
M1B403	Uncharacterized protein OS=Solanum tuberosum GN=PGSC0003DMG400014140 PE=4 SV=1 - [M1B403_SOLTU]	50.4581	6.31592	8.81	3	1.10245	0.965012	1.00298	1.03637	1.0267	0.97334	0.954389	0.965909	0.995149	0.972197	0.157155
M1CQZ4	Uncharacterized protein OS=Solanum tuberosum GN=PGSC0003DMG400028326 PE=4 SV=1 - [M1CQZ4_SOLTU]	8.40651	9.29053	14.47	1	0.943553	0.953607	0.866967	1.083	0.961782	1.0464	1.0336	1.02487	1.07713	1.0455	0.157211
M1BI99	Uncharacterized protein OS=Solanum tuberosum GN=PGSC0003DMG400017777 PE=4 SV=1 - [M1BI99_SOLTU]	51.2323	3.9165	2.84	1	0.913245	0.988148	1.07393	0.893757	0.96727	1.00896	1.14981	1.03939	1.01313	1.05282	0.157296
K4CXU8	Uncharacterized protein OS=Solanum lycopersicum GN=Solyc10g007690.2 PE=3 SV=1 - [K4CXU8_SOLLC]	12.6215	4.97021	49.17	2	1.08204	1.09716	0.96441	0.999296	1.03573	1.02298	0.853388	0.98266	0.969663	0.957174	0.157301
K4C0U7	Uncharacterized protein OS=Solanum lycopersicum GN=Solyc05g046140.2 PE=4 SV=1 - [K4C0U7_SOLLC]	17.5859	5.38916	5.33	1	0.915476	0.975973	0.87536	1.0382	0.951251	0.933412	1.15076	1.00679	1.1162	1.05179	0.157737
M1AHC2	Uncharacterized protein OS=Solanum tuberosum GN=PGSC0003DMG400008862 PE=4 SV=1 - [M1AHC2_SOLTU]	34.0517	6.81494	3.39	1	1.31077	0.924211	0.985523	1.10859	1.08227	0.986625	0.766056	0.921295	0.991076	0.916263	0.158426
K4BTI0	Uncharacterized protein OS=Solanum lycopersicum GN=Solyc04g071930.2 PE=4 SV=1 - [K4BTI0_SOLLC]	13.0827	10.0815	5.83	1	1.10705	1.1593	0.948272	1.03005	1.06117	1.06001	0.874854	0.970519	0.953304	0.964673	0.158931
M1AXK7	Uncharacterized protein OS=Solanum tuberosum GN=PGSC0003DMG400012494 PE=4 SV=1 - [M1AXK7_SOLTU]	35.7331	5.33838	6.9	1	1.05538	1.02584	0.980367	1.02842	1.0225	0.976208	0.926777	1.01777	1.00443	0.981298	0.15959
M1AB10	Uncharacterized protein OS=Solanum tuberosum GN=PGSC0003DMG400007244 PE=4 SV=1 - [M1AB10_SOLTU]	14.1759	5.47803	8.73	1	1.03328	1.13361	1.05859	0.959969	1.04636	0.811318	0.933999	1.01128	1.03018	0.946694	0.159754
M1CY77	Eukaryotic translation initiation factor 3 subunit G OS=Solanum tuberosum GN=PGSC0003DMG400030074 PE=3 SV=1 - [M1CY77_SOLTU]	32.4165	8.60205	6.78	2	0.985084	0.975864	0.937372	1.02383	0.980538	0.998624	0.98945	1.02806	1.05548	1.01791	0.160255
M1D0T5	Uncharacterized protein OS=Solanum tuberosum GN=PGSC0003DMG400030682 PE=3 SV=1 - [M1D0T5_SOLTU]	80.1856	5.2749	11.9	1	1.05697	0.977089	0.993192	1.10407	1.03283	0.894489	0.917882	0.982351	1.0468	0.960381	0.16067
K4D740	Uncharacterized protein OS=Solanum lycopersicum GN=Solyc11g020890.1 PE=4 SV=1 - [K4D740_SOLLC]	6.48716	9.81787	17.86	1	0.878787	1.01492	1.04274	0.871939	0.952097	1.05967	1.10917	0.91758	1.17546	1.06547	0.161581
K4CV92	Uncharacterized protein OS=Solanum lycopersicum GN=Solyc09g075150.2 PE=4 SV=1 - [K4CV92_SOLLC]	13.9623	9.49561	20.16	1	1.07733	1.02461	1.11743	1.10512	1.08112	1.03153	1.02259	1.01498	0.747853	0.95424	0.161765
M1CVI5	Uncharacterized protein OS=Solanum tuberosum GN=PGSC0003DMG400029416 PE=3 SV=1 - [M1CVI5_SOLTU]	25.1309	6.59521	19.91	4	1.07736	1.0901	0.936655	1.03656	1.03517	0.99181	0.894791	0.996732	0.982759	0.966523	0.161776
M1D4J7	Uncharacterized protein OS=Solanum tuberosum GN=PGSC0003DMG400031789 PE=4 SV=1 - [M1D4J7_SOLTU]	20.8547	10.7847	20.86	1	0.926034	1.00898	1.07857	0.822713	0.959074	0.99207	1.2152	1.12774	0.994387	1.08235	0.162746
K4CRS2	Uncharacterized protein OS=Solanum lycopersicum GN=Solyc09g014450.2 PE=4 SV=1 - [K4CRS2_SOLLC]	26.6888	8.45557	3.39	1	1.00464	1.07885	0.956	1.1261	1.0414	0.907708	0.901821	1.06542	0.94975	0.956174	0.163065
M1D4R3	Uncharacterized protein OS=Solanum tuberosum GN=PGSC0003DMG400031831 PE=4 SV=1 - [M1D4R3_SOLTU]	11.4078	8.38232	6.36	1	0.921319	0.987297	1.0694	0.925838	0.975962	1.01748	1.0296	1.05563	1.05485	1.03939	0.163066
K4BIL2	Uncharacterized protein OS=Solanum lycopersicum GN=Solyc03g093350.2 PE=4 SV=1 - [K4BIL2_SOLLC]	77.8783	6.84424	1.8	1	1.0568	1.13644	0.901988	1.1161	1.05283	1.02525	0.90377	0.976301	0.906529	0.952963	0.164393
B3F8H6	Sucrose synthase OS=Nicotiana langsdorffii x Nicotiana sanderae PE=2 SV=1 - [B3F8H6_NICLS]	68.7467	6.29053	13.67	1	0.901886	0.967953	0.888404	1.02201	0.945062	0.984784	1.04232	0.96909	1.2298	1.0565	0.165711
Q9M7P3	GTP-binding protein OS=Capsicum annuum PE=2 SV=1 - [Q9M7P3_CAPAN]	44.3722	6.90283	15.48	5	0.974971	0.99734	0.895019	1.00016	0.966873	0.989858	0.977359	1.03384	1.08227	1.02083	0.16605
A6N6K7	Phenylacetaldehyde reductase OS=Solanum lycopersicum GN=PAR1 PE=2 SV=1 - [A6N6K7_SOLLC]	35.8853	6.55127	5.49	2	1.03828	1.10208	1.04136	1.03267	1.0536	1.04785	1.00399	0.977293	0.813279	0.960602	0.166496
K4BMH6	Uncharacterized protein OS=Solanum lycopersicum GN=Solyc03g120270.2 PE=4 SV=1 - [K4BMH6_SOLLC]	103.544	4.95752	5.02	4	0.993762	1.03298	1.05705	1.01736	1.02529	0.962315	1.02642	0.96354	1.01368	0.991489	0.166906
M1BP65	Uncharacterized protein OS=Solanum tuberosum GN=PGSC0003DMG400019308 PE=4 SV=1 - [M1BP65_SOLTU]	37.9824	7.43018	12.39	2	0.969106	0.994781	1.02573	0.967521	0.989284	0.976361	1.06893	1.01381	1.09144	1.03764	0.168111
P04992	Ribulose bisphosphate carboxylase large chain OS=Petunia hybrida GN=rbcL PE=1 SV=1 - [RBL_PETHY]	33.3365	6.04932	41.75	3	1.03715	0.983998	0.985818	1.12688	1.03346	0.966674	0.918811	1.04873	0.910632	0.961213	0.168264
M1CUG9	Histone H2B OS=Solanum tuberosum GN=PGSC0003DMG400029167 PE=3 SV=1 - [M1CUG9_SOLTU]	9.64428	9.93506	65.52	6	0.940784	1.05673	0.902946	0.901484	0.950487	1.10072	0.908554	1.08814	1.06899	1.0416	0.168289
M1AI82	Uncharacterized protein OS=Solanum tuberosum GN=PGSC0003DMG400009052 PE=4 SV=1 - [M1AI82_SOLTU]	43.7553	6.41748	2.34	1	0.825961	0.962483	1.0474	1.03784	0.968422	1.22699	1.16357	1.08385	0.923879	1.09957	0.168391
P12424	Glutamine synthetase OS=Nicotiana plumbaginifolia PE=2 SV=1 - [GLNA_NICPL]	32.4902	6.55127	7.43	1	1.1052	1.14397	1.05798	1.00207	1.07731	1.10926	0.972388	0.961381	0.791266	0.958575	0.169891
Q2XTC2	Elongation factor 1-alpha OS=Solanum tuberosum GN=PGSC0003DMG400020772 PE=2 SV=1 - [Q2XTC2_SOLTU]	49.2258	9.12939	22.99	3	0.95951	0.992773	0.986267	0.98365	0.98055	0.988826	0.976826	1.07909	1.05982	1.02614	0.170328
M1CIJ8	Uncharacterized protein OS=Solanum tuberosum GN=PGSC0003DMG400026513 PE=4 SV=1 - [M1CIJ8_SOLTU]	25.0568	7.57666	5.33	1	0.967653	0.918344	1.01002	0.994203	0.972554	0.963543	1.0411	1.01245	1.12241	1.03487	0.170597
Q3HRY2	Ribosomal protein L17-like protein OS=Solanum tuberosum GN=PGSC0003DMG400003826 PE=2 SV=1 - [Q3HRY2_SOLTU]	15.005	10.4771	45	6	0.96597	1.01313	0.86721	0.995538	0.960463	1.08807	0.944721	1.12133	1.00878	1.04072	0.171349
M1AEU5	Uncharacterized protein OS=Solanum tuberosum GN=PGSC0003DMG400008244 PE=4 SV=1 - [M1AEU5_SOLTU]	61.044	5.17334	2.38	1	1.03914	0.861643	0.941017	1.03237	0.968542	1.05177	1.07861	1.07843	0.977072	1.04647	0.171374
Q3HRY4	Putative uncharacterized protein OS=Solanum tuberosum PE=2 SV=1 - [Q3HRY4_SOLTU]	14.5218	9.99365	43.33	7	0.912793	1.02453	0.829455	0.980798	0.936893	1.02074	0.900606	1.17093	1.11287	1.05129	0.171683
M1D6E0	Uncharacterized protein OS=Solanum tuberosum GN=PGSC0003DMG400033034 PE=3 SV=1 - [M1D6E0_SOLTU]	104.974	6.75635	26.36	1	1.14381	0.905884	1.02245	1.11408	1.04656	1.04534	0.944188	0.940258	0.801797	0.932896	0.171984
K4D8H8	Uncharacterized protein OS=Solanum lycopersicum GN=Solyc11g045140.1 PE=4 SV=1 - [K4D8H8_SOLLC]	19.4445	8.22119	7.23	1	1.01764	0.872461	0.897874	0.990707	0.94467	1.06278	1.23948	1.11715	0.888076	1.07687	0.172706
Q308B2	Putative uncharacterized protein OS=Solanum tuberosum PE=2 SV=1 - [Q308B2_SOLTU]	30.0456	11.5024	3.1	1	1.06639	1.0152	1.07213	1.20301	1.08918	1.02574	1.09967	0.897139	0.692115	0.928666	0.173446
M0ZSR4	Uncharacterized protein OS=Solanum tuberosum GN=PGSC0003DMG400002804 PE=4 SV=1 - [M0ZSR4_SOLTU]	10.5614	8.82178	27.08	2	1.06057	0.937821	0.970015	1.05137	1.00494	0.928821	0.936533	1.01366	0.899441	0.944615	0.173521
M1BM45	Uncharacterized protein OS=Solanum tuberosum GN=PGSC0003DMG400018738 PE=4 SV=1 - [M1BM45_SOLTU]	21.0231	5.59229	7.57	1	0.945799	0.909026	0.89679	0.97714	0.932189	1.00199	0.886637	1.14819	1.2158	1.06315	0.173563
A8Y666	ATP synthase subunit beta (Fragment) OS=Solanum sisymbriifolium GN=atpB PE=3 SV=1 - [A8Y666_9SOLN]	6.15016	4.729	46.67	1	0.898511	1.03351	1.14689	1.05336	1.03307	0.945328	0.901964	1.01326	0.899039	0.939897	0.173712
M0ZRX7	Uncharacterized protein OS=Solanum tuberosum GN=PGSC0003DMG400002622 PE=4 SV=1 - [M0ZRX7_SOLTU]	47.8468	5.21143	4.26	2	1.00378	1.10575	0.994456	1.05521	1.0398	1.01579	0.963379	1.01692	0.975731	0.992957	0.174429
M1AQZ1	Pyruvate kinase OS=Solanum tuberosum GN=PGSC0003DMG400010913 PE=3 SV=1 - [M1AQZ1_SOLTU]	54.322	7.40088	16.93	1	0.91744	0.905793	1.1297	0.860266	0.953299	0.998681	1.11567	1.01683	1.11885	1.06251	0.174713
Q9SXX5	Fructose-bisphosphate aldolase OS=Nicotiana paniculata PE=2 SV=1 - [Q9SXX5_NICPA]	42.789	6.78564	29.65	1	1.07546	1.04176	1.05433	1.06409	1.05891	1.02163	1.06232	0.961906	0.827101	0.968239	0.175296
Q2PYX3	Fructose-bisphosphate aldolase OS=Solanum tuberosum GN=PGSC0003DMG400002675 PE=2 SV=1 - [Q2PYX3_SOLTU]	75.998	5.36377	20.92	5	0.955456	1.03015	0.907167	0.976853	0.967406	1.00103	1.02127	0.984557	1.04801	1.01372	0.175403
Q8MDI3	Ribulose bisphosphate carboxylase large chain (Fragment) OS=Capsicum frutescens GN=rbcL PE=3 SV=1 - [Q8MDI3_CAPFR]	2.57723	6.44287	69.57	1	1.02823	0.954988	1.00241	1.11083	1.02411	1.01615	0.914458	0.999799	0.887737	0.954537	0.176082
M1CRH0	Uncharacterized protein OS=Solanum tuberosum GN=PGSC0003DMG400028420 PE=4 SV=1 - [M1CRH0_SOLTU]	52.3901	5.40186	5.24	3	1.10903	1.00026	1.04215	1.08764	1.05977	1.06501	0.896375	1.04719	0.889165	0.974435	0.176158
K4CCP7	Elongation factor Ts OS=Solanum lycopersicum GN=Solyc07g018360.2 PE=3 SV=1 - [K4CCP7_SOLLC]	107.039	4.77979	12.15	1	0.955055	1.11655	1.03489	1.10424	1.05268	1.0894	0.939328	0.931825	0.910475	0.967757	0.176297
M1A6R6	Uncharacterized protein OS=Solanum tuberosum GN=PGSC0003DMG400006207 PE=4 SV=1 - [M1A6R6_SOLTU]	17.17	10.9604	16.33	1	0.87742	1.11868	0.855052	0.898591	0.937435	1.06082	0.915765	1.21264	1.08854	1.06944	0.176851
K4AZP5	Uncharacterized protein OS=Solanum lycopersicum GN=Solyc01g095050.2 PE=4 SV=1 - [K4AZP5_SOLLC]	5.01452	6.56592	19.57	1	1.04628	1.19874	0.953626	0.984198	1.04571	0.891832	0.945119	0.976659	0.984156	0.949441	0.177161
K4CRJ2	Uncharacterized protein OS=Solanum lycopersicum GN=Solyc09g011660.2 PE=4 SV=1 - [K4CRJ2_SOLLC]	18.5048	7.48877	10.37	2	0.959669	1.11391	0.99203	1.16597	1.0579	0.985188	1.03802	0.892023	0.954594	0.967457	0.17759
K4BGL3	Uncharacterized protein OS=Solanum lycopersicum GN=Solyc03g053110.2 PE=4 SV=1 - [K4BGL3_SOLLC]	25.0101	8.42627	4.33	1	1.11451	0.969741	0.981874	1.09666	1.0407	1.05673	0.974724	0.922231	0.88716	0.960212	0.177889
Q071R6	GBSSI (Fragment) OS=Iochroma confertiflorum GN=GBSSI PE=4 SV=1 - [Q071R6_9SOLA]	29.5904	8.57275	5.58	1	1.07364	1.03911	0.994789	0.980243	1.02195	0.958856	0.968495	0.962143	1.03086	0.98009	0.178165
K4BMH7	Uncharacterized protein OS=Solanum lycopersicum GN=Solyc03g120280.1 PE=4 SV=1 - [K4BMH7_SOLLC]	40.9931	4.83057	2.31	1	0.964238	1.02908	1.2524	1.03696	1.07067	1.0126	1.0187	0.880818	0.918137	0.957563	0.179035
Q93YG9	Insulin degrading enzyme OS=Solanum lycopersicum GN=ide PE=2 SV=1 - [Q93YG9_SOLLC]	64.1317	6.93213	1.27	1	1.09711	1.40258	0.996263	0.896448	1.0981	0.979691	0.900092	0.916412	0.833159	0.907338	0.179386
D5FPG8	Feruloyl transferase OS=Solanum tuberosum PE=2 SV=1 - [D5FPG8_SOLTU]	47.9085	5.30029	4.39	2	0.895797	1.01057	0.885861	1.07351	0.966434	1.06299	1.07368	1.02222	1.0236	1.04562	0.180379
Q38M76	Putative uncharacterized protein OS=Solanum tuberosum PE=2 SV=1 - [Q38M76_SOLTU]	21.9629	9.5835	37.11	7	0.968985	0.953908	0.8804	1.04712	0.962603	1.00375	0.954137	1.09432	1.09199	1.03605	0.181162
Q3HRX7	Ribosomal protein L25-like protein OS=Solanum tuberosum GN=PGSC0003DMG400023925 PE=2 SV=1 - [Q3HRX7_SOLTU]	17.2087	10.2573	20.26	1	0.973701	1.00005	0.860087	0.953655	0.946872	1.19355	0.927967	1.14524	0.975141	1.06047	0.181276
M1B064	Uncharacterized protein OS=Solanum tuberosum GN=PGSC0003DMG401013112 PE=4 SV=1 - [M1B064_SOLTU]	160.952	7.34229	4.7	2	0.993376	0.908498	0.98331	1.00484	0.972506	0.940736	1.05385	1.05089	1.06884	1.02858	0.181727
K4BJE2	Uncharacterized protein OS=Solanum lycopersicum GN=Solyc03g097250.2 PE=4 SV=1 - [K4BJE2_SOLLC]	12.9035	9.67139	9.17	1	0.986517	0.986884	1.19085	1.04011	1.05109	1.10266	0.926767	0.889012	0.802676	0.930278	0.18227
O64384	Protoporphyrinogen oxidase OS=Solanum tuberosum PE=2 SV=1 - [O64384_SOLTU]	60.4252	8.70459	5.75	1	0.821992	1.03709	0.921075	0.947458	0.931903	1.1495	0.847823	1.08715	1.22025	1.07618	0.182542
K4B489	Uncharacterized protein OS=Solanum lycopersicum GN=Solyc01g112280.2 PE=4 SV=1 - [K4B489_SOLLC]	50.241	7.03467	9.82	4	0.972975	0.984892	0.943228	0.959333	0.965107	0.948966	0.943362	0.963336	0.94048	0.949036	0.182835
M1D3N2	Phenylalanine ammonia-lyase OS=Solanum tuberosum GN=PGSC0003DMG400031365 PE=3 SV=1 - [M1D3N2_SOLTU]	77.4945	6.23975	7.31	1	0.987156	1.01012	1.17695	1.05287	1.05678	0.950702	1.06974	0.850809	0.983411	0.963666	0.183642
B5LAV1	3-isopropylmalate dehydrogenase OS=Capsicum annuum PE=2 SV=1 - [B5LAV1_CAPAN]	43.4554	6.26514	11.58	1	1.01986	0.918301	0.957242	0.983359	0.96969	1.04535	1.09306	1.12231	0.924518	1.04631	0.18376
K4CBC3	Uncharacterized protein OS=Solanum lycopersicum GN=Solyc07g006520.2 PE=3 SV=1 - [K4CBC3_SOLLC]	57.9947	9.42236	4.29	2	1.0035	0.87248	1.08097	0.961686	0.979659	0.983546	1.12364	1.07021	1.06072	1.05953	0.183832
K4BL65	Uncharacterized protein OS=Solanum lycopersicum GN=Solyc03g115630.2 PE=3 SV=1 - [K4BL65_SOLLC]	46.465	6.07471	2.58	1	1.04382	0.99723	1.16712	1.10451	1.07817	0.973418	1.08065	1.00088	0.732232	0.946796	0.18529
Q9FVC9	Diacylglycerol kinase variant B OS=Solanum lycopersicum GN=Dgk1 PE=4 SV=1 - [Q9FVC9_SOLLC]	37.5071	8.51416	4.83	1	0.884941	0.895245	1.11788	0.946838	0.961226	1.03388	1.0574	1.01661	1.10716	1.05376	0.186374
K4CRN4	Uncharacterized protein OS=Solanum lycopersicum GN=Solyc09g013080.2 PE=3 SV=1 - [K4CRN4_SOLLC]	57.6111	6.97607	4.61	2	0.899034	0.932878	1.07178	1.01584	0.979884	1.05448	1.14196	0.997487	1.02667	1.05515	0.186407
K4BWK0	Uncharacterized protein OS=Solanum lycopersicum GN=Solyc05g006740.2 PE=3 SV=1 - [K4BWK0_SOLLC]	24.0253	5.51611	4.67	2	1.02011	1.02271	0.96645	1.12238	1.03291	0.976951	0.939665	0.985781	1.00504	0.97686	0.186813
M1CKG8	Uncharacterized protein OS=Solanum tuberosum GN=PGSC0003DMG400027002 PE=4 SV=1 - [M1CKG8_SOLTU]	101.874	8.74854	6.46	3	1.00187	0.9758	1.08243	1.07368	1.03344	1.04018	0.972789	0.985643	0.87639	0.96875	0.186916
M1CFI4	Uncharacterized protein OS=Solanum tuberosum GN=PGSC0003DMG400025823 PE=4 SV=1 - [M1CFI4_SOLTU]	65.912	6.27783	15.67	4	1.02891	1.05921	1.05805	1.02071	1.04172	1.0323	1.04707	0.943144	0.888972	0.977872	0.186944
K4D2D0	Uncharacterized protein OS=Solanum lycopersicum GN=Solyc10g078890.1 PE=3 SV=1 - [K4D2D0_SOLLC]	36.9417	8.38232	5.03	1	0.86008	1.04588	0.873883	1.06884	0.962169	1.08375	1.11791	1.02537	1.00446	1.05787	0.187677
M1CKW2	Uncharacterized protein OS=Solanum tuberosum GN=PGSC0003DMG400027086 PE=3 SV=1 - [M1CKW2_SOLTU]	11.9935	10.272	29.52	4	0.986237	1.02753	0.825303	0.945413	0.94612	1.0839	0.926921	1.18153	1.00817	1.05013	0.188101
M1DTX9	Uncharacterized protein OS=Solanum tuberosum GN=PGSC0003DMG400043914 PE=4 SV=1 - [M1DTX9_SOLTU]	125.117	6.93213	1.16	1	1.10331	1.06421	1.13601	0.954626	1.06454	1.08016	0.968633	0.986113	0.807117	0.960505	0.188588
K4BDU9	Uncharacterized protein OS=Solanum lycopersicum GN=Solyc03g005250.2 PE=4 SV=1 - [K4BDU9_SOLLC]	33.8115	5.87158	4.67	1	0.929183	0.959776	1.11675	1.18872	1.04861	0.880195	1.0347	0.854493	0.973721	0.935778	0.189694
Q69EZ9	Alpha-DOX2 OS=Solanum lycopersicum GN=LOC543896 PE=2 SV=1 - [Q69EZ9_SOLLC]	67.2024	6.87354	3.61	1	1.0593	1.18841	1.14073	0.895267	1.07093	0.917923	1.07042	0.986828	0.803008	0.944544	0.191323
Q9LM03	Methionine synthase OS=Solanum tuberosum GN=MS PE=2 SV=1 - [Q9LM03_SOLTU]	84.6127	6.31592	19.35	10	0.993018	1.06276	0.98781	1.02427	1.01696	0.968472	0.998749	0.927795	1.01823	0.978312	0.191343
K4CHD8	Uncharacterized protein OS=Solanum lycopersicum GN=Solyc07g064590.2 PE=4 SV=1 - [K4CHD8_SOLLC]	21.1794	5.17334	3.72	1	0.93223	0.933304	0.955638	1.08742	0.977148	1.07992	1.04489	1.04122	0.996699	1.04068	0.191581
M1AUY9	Uncharacterized protein OS=Solanum tuberosum GN=PGSC0003DMG400011842 PE=3 SV=1 - [M1AUY9_SOLTU]	39.7871	9.15869	2.82	1	0.91049	0.892041	1.08587	0.97111	0.964879	0.952399	1.13893	1.0454	1.06569	1.0506	0.191977
M1BNA7	Uncharacterized protein OS=Solanum tuberosum GN=PGSC0003DMG400019091 PE=3 SV=1 - [M1BNA7_SOLTU]	55.9248	8.71924	7.41	4	0.96902	0.966494	0.947602	0.982144	0.966315	0.968659	0.962491	1.1319	1.08795	1.03775	0.192229
M1CEC3	Uncharacterized protein OS=Solanum tuberosum GN=PGSC0003DMG400025527 PE=4 SV=1 - [M1CEC3_SOLTU]	47.1311	6.03662	15.46	1	0.881003	0.894633	1.10478	0.979632	0.965013	1.0496	1.16293	0.961047	1.07714	1.06268	0.192444
M1BLV1	Thioredoxin reductase OS=Solanum tuberosum GN=PGSC0003DMG400018665 PE=3 SV=1 - [M1BLV1_SOLTU]	34.8495	5.43994	8.23	2	1.02498	1.01511	0.986618	1.03281	1.01488	0.97221	1.03219	0.957005	0.982962	0.986093	0.192778
M1B1S3	Uncharacterized protein OS=Solanum tuberosum GN=PGSC0003DMG400013485 PE=4 SV=1 - [M1B1S3_SOLTU]	46.5159	5.40186	15.37	6	0.981303	1.00596	0.87926	0.96498	0.957876	0.93632	1.02393	1.02707	1.09394	1.02032	0.192958
M1BTN7	Uncharacterized protein OS=Solanum tuberosum GN=PGSC0003DMG400020422 PE=3 SV=1 - [M1BTN7_SOLTU]	109.096	6.15088	24.14	7	0.984215	0.983786	1.13541	1.08699	1.0476	0.97858	1.02313	0.997073	0.93061	0.982349	0.19404
M1BAH1	Uncharacterized protein OS=Solanum tuberosum GN=PGSC0003DMG400015786 PE=4 SV=1 - [M1BAH1_SOLTU]	58.378	4.95752	2.68	1	0.972725	1.03313	1.10515	0.98455	1.02389	0.851864	1.03835	0.931756	0.980821	0.950698	0.194214
M0ZKU6	Uncharacterized protein OS=Solanum tuberosum GN=PGSC0003DMG400001127 PE=3 SV=1 - [M0ZKU6_SOLTU]	18.3162	11.1362	4.02	1	0.876041	1.11243	0.76215	0.883165	0.908446	1.15289	0.857117	1.32876	1.02622	1.09125	0.194521
K4CH27	Uncharacterized protein OS=Solanum lycopersicum GN=Solyc07g063440.2 PE=4 SV=1 - [K4CH27_SOLLC]	139.829	6.29053	1.99	2	1.04985	1.01752	0.980514	1.04334	1.02281	0.918824	0.984642	0.989277	1.03154	0.981071	0.194643
M1C710	Uncharacterized protein OS=Solanum tuberosum GN=PGSC0003DMG400023766 PE=4 SV=1 - [M1C710_SOLTU]	115.195	4.98291	3.24	3	1.02062	0.995794	0.968126	1.02146	1.0015	0.970025	0.973705	0.978832	0.997627	0.980047	0.195391
L7UV56	26S proteasome ATPase regulatory subunit 6 OS=Capsicum annuum GN=RPT6 PE=2 SV=1 - [L7UV56_CAPAN]	27.3295	9.56885	24.47	1	0.90894	1.02089	0.85413	1.03879	0.955687	1.09461	0.914356	1.11781	1.06814	1.04873	0.195554
K4CGX0	Uncharacterized protein OS=Solanum lycopersicum GN=Solyc07g062870.2 PE=3 SV=1 - [K4CGX0_SOLLC]	13.0378	10.3306	9.17	1	0.972647	1.03822	1.01006	1.081	1.02548	1.01044	0.929925	0.991404	0.999793	0.982891	0.196859
K4BW06	Uncharacterized protein OS=Solanum lycopersicum GN=Solyc04g082790.2 PE=4 SV=1 - [K4BW06_SOLLC]	55.2331	5.42725	2	1	0.971593	0.987994	0.862454	1.06088	0.97073	1.13057	1.02486	1.03548	0.990102	1.04525	0.197174
K4BXV0	Uncharacterized protein OS=Solanum lycopersicum GN=Solyc05g012270.2 PE=3 SV=1 - [K4BXV0_SOLLC]	25.7883	8.54346	7.08	1	1.04927	0.91867	0.959752	0.97394	0.975409	1.09968	0.948383	1.03422	1.06585	1.03703	0.197497
M1C5J7	Uncharacterized protein OS=Solanum tuberosum GN=PGSC0003DMG400023453 PE=3 SV=1 - [M1C5J7_SOLTU]	60.4285	5.93506	8.83	5	0.939073	0.981982	0.991585	0.97469	0.971832	0.955641	1.02631	1.00004	1.08249	1.01612	0.198334
H9C956	3-deoxy-D-arabino-heptulosonate 7-phosphate synthase (Fragment) OS=Nicotiana benthamiana GN=DAHPS PE=2 SV=1 - [H9C956_NICBE]	52.9049	8.27979	7.93	1	1.06101	1.06292	0.919974	1.10717	1.03777	0.971491	1.0174	0.913455	0.972182	0.968631	0.198459
M1C7P0	Uncharacterized protein OS=Solanum tuberosum GN=PGSC0003DMG400023955 PE=4 SV=1 - [M1C7P0_SOLTU]	29.9687	8.98291	3.81	1	0.947271	1.11225	1.01444	1.08233	1.03907	0.94413	0.860639	0.99996	1.04155	0.961569	0.199331
M1A0W9	Uncharacterized protein OS=Solanum tuberosum GN=PGSC0003DMG400004788 PE=4 SV=1 - [M1A0W9_SOLTU]	28.1591	8.20654	14.39	3	0.94335	1.02864	1.04186	0.923568	0.984355	1.03407	1.07314	1.03177	0.999295	1.03457	0.200086
K4D9S0	Uncharacterized protein OS=Solanum lycopersicum GN=Solyc11g066630.1 PE=4 SV=1 - [K4D9S0_SOLLC]	17.2944	9.99365	9.66	1	0.941368	1.04085	0.88596	1.02706	0.97381	1.05635	0.996723	1.02503	1.05988	1.0345	0.200145
M1CDE0	Uncharacterized protein OS=Solanum tuberosum GN=PGSC0003DMG400025299 PE=4 SV=1 - [M1CDE0_SOLTU]	46.8113	6.40479	17.7	5	1.06661	1.05572	1.04815	0.981384	1.03797	0.897132	0.960252	1.08458	0.941002	0.970742	0.200799
C5MR70	Chloroplast manganese stabilizing protein-II (Fragment) OS=Solanum tuberosum GN=Msp-II PE=2 SV=1 - [C5MR70_SOLTU]	31.2138	6.771	44.22	1	1.01924	1.02066	0.85607	0.991164	0.971785	1.05842	1.0541	1.06452	0.97476	1.03795	0.202107
Q9SXX4	Fructose-bisphosphate aldolase OS=Nicotiana paniculata GN=NpAldP1 PE=1 SV=1 - [Q9SXX4_NICPA]	29.5853	8.57275	40.36	5	1.06233	1.02727	0.920405	1.15941	1.04235	0.969144	0.876403	1.0467	0.923011	0.953814	0.202604
M1CT51	Uncharacterized protein OS=Solanum tuberosum GN=PGSC0003DMG400028798 PE=4 SV=1 - [M1CT51_SOLTU]	56.489	5.07178	5.47	1	0.946012	0.969159	0.879521	1.06794	0.965657	1.0551	0.942738	1.05924	1.10053	1.0394	0.204158
M1CP75	Uncharacterized protein OS=Solanum tuberosum GN=PGSC0003DMG400027903 PE=4 SV=1 - [M1CP75_SOLTU]	44.8691	10.3306	37.68	5	0.95616	0.988245	0.965842	0.976078	0.971581	1.08036	0.975764	1.0995	0.96043	1.02901	0.204365
K4BDZ9	Uncharacterized protein OS=Solanum lycopersicum GN=Solyc03g005750.2 PE=4 SV=1 - [K4BDZ9_SOLLC]	89.9873	5.42725	1.3	1	0.972903	1.04494	1.12671	1.03187	1.04411	1.00287	0.972441	0.963452	1.02827	0.991757	0.204626
Q3HRX6	40S ribosomal protein S7-like protein OS=Solanum tuberosum GN=PGSC0003DMG400028781 PE=2 SV=1 - [Q3HRX6_SOLTU]	61.1174	9.71533	11.81	3	0.99976	0.996415	0.975887	0.97007	0.985533	1.148	1.00863	1.01751	0.996455	1.04265	0.204957
M1C5A4	Uncharacterized protein OS=Solanum tuberosum GN=PGSC0003DMG400023394 PE=3 SV=1 - [M1C5A4_SOLTU]	16.2397	9.94971	30.56	5	0.985499	1.03119	0.90851	0.997517	0.980678	1.0401	0.962682	1.04879	1.06823	1.02995	0.206906
M1BPE5	40S ribosomal protein S24 OS=Solanum tuberosum GN=PGSC0003DMG400019360 PE=3 SV=1 - [M1BPE5_SOLTU]	15.3956	10.6235	31.58	4	0.997501	1.00081	0.8559	0.957885	0.953025	1.00285	0.931475	1.16253	1.05434	1.0378	0.207954
M0ZKA3	Acyl-[acyl-carrier-protein] desaturase OS=Solanum tuberosum GN=PGSC0003DMG400000978 PE=3 SV=1 - [M0ZKA3_SOLTU]	44.7156	6.80029	9.41	1	1.246	0.968355	1.10858	0.927465	1.0626	0.846223	1.04674	0.926386	0.946987	0.941585	0.20893
O82529	Ribosomal protein L27a OS=Petunia hybrida PE=2 SV=1 - [O82529_PETHY]	16.56	10.4624	47.33	7	0.95584	1.0236	0.889266	1.00757	0.969068	1.03752	0.946095	1.1883	1.04209	1.0535	0.20939
M0ZH84	Uncharacterized protein OS=Solanum tuberosum GN=PGSC0003DMG400000273 PE=4 SV=1 - [M0ZH84_SOLTU]	39.634	5.78271	3.36	1	1.09407	1.07079	1.01542	0.992648	1.04323	1.07598	0.992922	0.951114	0.880154	0.975041	0.210731
M0ZVP6	Uncharacterized protein OS=Solanum tuberosum GN=PGSC0003DMG400003559 PE=4 SV=1 - [M0ZVP6_SOLTU]	14.4797	10.5356	7.58	1	0.964155	0.906389	0.976325	0.87323	0.930025	0.919063	1.02979	0.998568	1.30048	1.06198	0.21077
Q2V9B2	Eukaryotic translation initiation factor 2 beta subunit-like OS=Solanum tuberosum GN=PGSC0003DMG400030471 PE=2 SV=1 - [Q2V9B2_SOLTU]	29.8312	6.41748	17.74	4	0.983015	1.03254	0.829372	1.0107	0.963907	1.13881	0.979214	1.09683	0.983868	1.04968	0.21091
M9NY64	DRM1 (Fragment) OS=Nicotiana benthamiana GN=DRM1 PE=2 SV=1 - [M9NY64_NICBE]	11.8298	9.12939	10.81	1	1.01222	1.1469	1.01716	0.969635	1.03648	1.00488	0.977473	0.985952	0.931084	0.974848	0.211248
Q9ST30	Histone H2A (Fragment) OS=Solanum melongena GN=EEF20 PE=2 SV=1 - [Q9ST30_SOLME]	13.969	10.3745	35.11	2	0.950395	1.06373	0.852512	0.860449	0.931772	1.18349	0.881907	1.25854	0.982005	1.07648	0.211459
M1CAS5	Uncharacterized protein OS=Solanum tuberosum GN=PGSC0003DMG400024707 PE=3 SV=1 - [M1CAS5_SOLTU]	74.6327	5.43994	3.74	1	0.935886	1.04623	0.897421	1.01647	0.974	1.05614	1.09741	0.947841	1.05782	1.0398	0.212754
A7UF49	Granule-bound starch synthase (Fragment) OS=Nolana flaccida GN=GBSSI PE=4 SV=1 - [A7UF49_9SOLA]	25.8727	8.48486	14.11	2	0.907494	0.93771	1.07793	0.929216	0.963087	0.977115	1.09483	0.971272	1.10666	1.03747	0.212952
D2KBA9	Dehydroquinate dehydratase OS=Solanum tuberosum GN=DD PE=2 SV=1 - [D2KBA9_SOLTU]	57.0652	5.93506	3.42	2	0.973219	0.998063	0.890586	1.00978	0.967912	1.03458	0.98418	1.06445	0.978693	1.01548	0.212987
M0ZI69	Isocitrate dehydrogenase [NADP] OS=Solanum tuberosum GN=PGSC0003DMG400000481 PE=3 SV=1 - [M0ZI69_SOLTU]	45.2819	6.55127	12.97	1	1.01083	0.998604	0.886803	1.01357	0.977452	0.982889	1.03384	1.01089	1.10965	1.03432	0.213174
M1CCE4	Uncharacterized protein OS=Solanum tuberosum GN=PGSC0003DMG400025042 PE=4 SV=1 - [M1CCE4_SOLTU]	21.6004	5.09717	6.39	1	1.04068	1.00968	0.964305	0.933759	0.987106	0.983662	0.988333	1.10732	1.11017	1.04737	0.214231
M1AXY0	Uncharacterized protein OS=Solanum tuberosum GN=PGSC0003DMG400012571 PE=3 SV=1 - [M1AXY0_SOLTU]	21.1579	9.05615	5.08	1	0.940981	1.10733	1.23691	1.0921	1.09433	1.13146	1.04993	0.829683	0.780903	0.947994	0.214242
K4B2H4	Uncharacterized protein OS=Solanum lycopersicum GN=Solyc01g106050.2 PE=3 SV=1 - [K4B2H4_SOLLC]	90.6918	6.7124	2.55	2	0.999037	1.02309	1.20086	1.01452	1.05938	0.990852	1.08721	0.932702	0.787283	0.949513	0.215525
Q3C1I8	Apocytochrome f OS=Nicotiana sylvestris GN=petA PE=1 SV=1 - [CYF_NICSY]	19.6345	9.18799	48.33	2	1.0431	1.04501	1.14585	0.941035	1.04375	1.03469	1.02822	0.92678	0.833936	0.955906	0.21556
K4D4L9	Uncharacterized protein OS=Solanum lycopersicum GN=Solyc11g006060.1 PE=4 SV=1 - [K4D4L9_SOLLC]	50.2359	5.16064	7.76	4	1.00204	1.10023	0.971106	1.07348	1.03671	1.03521	1.01406	0.95488	0.920658	0.981202	0.215868
K4BZH4	Uncharacterized protein OS=Solanum lycopersicum GN=Solyc05g021310.1 PE=4 SV=1 - [K4BZH4_SOLLC]	12.516	4.85596	6.25	1	1.0197	1.0999	0.932648	1.08105	1.03333	0.956236	0.877836	1.02609	0.998207	0.964591	0.216347
M1BVI6	Uncharacterized protein OS=Solanum tuberosum GN=PGSC0003DMG400020885 PE=4 SV=1 - [M1BVI6_SOLTU]	18.9736	9.18799	4.73	1	0.938262	0.879094	1.02092	1.02831	0.966646	0.97903	0.96933	1.09954	1.0994	1.03682	0.216365
K4AX01	Uncharacterized protein OS=Solanum lycopersicum GN=Solyc01g067530.2 PE=3 SV=1 - [K4AX01_SOLLC]	74.0807	5.14795	1.49	1	1.06147	1.18693	1.04414	0.988539	1.07027	1.02825	1.1088	0.883592	0.79234	0.953245	0.216719
K4BPJ4	Uncharacterized protein OS=Solanum lycopersicum GN=Solyc04g011400.2 PE=4 SV=1 - [K4BPJ4_SOLLC]	25.4303	9.59814	20.63	2	1.03266	1.03566	0.9879	1.02811	1.02108	0.991455	0.940792	1.01733	1.0158	0.991344	0.216745
M1CDE9	Uncharacterized protein OS=Solanum tuberosum GN=PGSC0003DMG400025305 PE=4 SV=1 - [M1CDE9_SOLTU]	14.5797	10.9165	16.41	2	0.96852	1.00406	0.945968	0.97333	0.972969	1.09374	1.03979	1.09597	0.92002	1.03738	0.217597
K4CBH4	Uncharacterized protein OS=Solanum lycopersicum GN=Solyc07g007030.1 PE=4 SV=1 - [K4CBH4_SOLLC]	53.7586	7.04932	1.89	1	0.940312	0.795221	1.1682	0.877862	0.945398	1.04623	1.18245	0.937367	1.16289	1.08224	0.217781
M1A136	Uncharacterized protein OS=Solanum tuberosum GN=PGSC0003DMG400004838 PE=4 SV=1 - [M1A136_SOLTU]	15.8527	10.521	43.36	3	0.995823	1.06434	0.869904	0.954114	0.971046	1.05588	0.962238	1.08391	1.05456	1.03915	0.217804
M1CMR6	Uncharacterized protein OS=Solanum tuberosum GN=PGSC0003DMG400027532 PE=4 SV=1 - [M1CMR6_SOLTU]	12.4256	9.75928	28.32	1	0.95173	0.899369	0.992055	0.931198	0.943588	1.10157	1.30749	0.980907	0.916547	1.07663	0.220124
M1BUH4	Uncharacterized protein OS=Solanum tuberosum GN=PGSC0003DMG400020623 PE=4 SV=1 - [M1BUH4_SOLTU]	19.9198	6.29053	5	1	1.03354	0.993135	0.976498	0.954057	0.989307	1.05083	1.03446	1.08153	0.960993	1.03195	0.220229
M1CHJ4	Glutathione peroxidase OS=Solanum tuberosum GN=PGSC0003DMG400026281 PE=3 SV=1 - [M1CHJ4_SOLTU]	26.1373	8.86572	26.05	5	0.990596	1.07341	0.949526	1.02638	1.00998	0.970165	0.910773	1.00279	0.976203	0.964983	0.222254
M1BW31	Uncharacterized protein OS=Solanum tuberosum GN=PGSC0003DMG400021072 PE=4 SV=1 - [M1BW31_SOLTU]	13.7213	5.22412	8	1	1.13858	1.02071	0.960562	1.03431	1.03854	1.02198	0.858117	1.03075	0.945748	0.964147	0.22234
M1BLT2	Uncharacterized protein OS=Solanum tuberosum GN=PGSC0003DMG400018657 PE=4 SV=1 - [M1BLT2_SOLTU]	40.6502	7.89893	15.26	5	1.02865	0.914444	1.14418	1.07524	1.04063	0.956663	1.03431	0.950583	0.912476	0.963508	0.222554
M1CQS1	Uncharacterized protein OS=Solanum tuberosum GN=PGSC0003DMG400028284 PE=4 SV=1 - [M1CQS1_SOLTU]	56.9052	7.10791	1.83	1	0.956558	1.20997	0.951613	1.0723	1.04761	0.946425	0.878295	1.01678	0.965109	0.951651	0.222664
K4BW05	Uncharacterized protein OS=Solanum lycopersicum GN=Solyc04g082780.2 PE=4 SV=1 - [K4BW05_SOLLC]	35.5562	5.63037	5.61	2	0.943464	0.796956	1.13684	0.895629	0.943223	1.06445	1.14029	0.928309	1.11337	1.06161	0.22284
M1BS91	40S ribosomal protein S8 OS=Solanum tuberosum GN=PGSC0003DMG400020108 PE=3 SV=1 - [M1BS91_SOLTU]	22.2648	9.96436	28.28	5	0.944794	1.00504	0.86125	0.994619	0.951425	1.03311	0.905815	1.21049	1.05456	1.051	0.223012
K4CDQ9	Uncharacterized protein OS=Solanum lycopersicum GN=Solyc07g039330.2 PE=4 SV=1 - [K4CDQ9_SOLLC]	41.1179	5.18604	2.65	1	0.873766	1.00555	0.999624	0.992162	0.967776	0.940827	1.01545	1.06282	1.12514	1.03606	0.223183
M1AWA7	Uncharacterized protein OS=Solanum tuberosum GN=PGSC0003DMG400012205 PE=3 SV=1 - [M1AWA7_SOLTU]	33.1674	7.88428	7.77	2	0.923487	0.834872	1.10663	0.972449	0.95936	1.04958	1.12065	0.915116	1.20972	1.07377	0.223481
M1CCD0	Uncharacterized protein OS=Solanum tuberosum GN=PGSC0003DMG400025034 PE=4 SV=1 - [M1CCD0_SOLTU]	20.2875	9.12939	18.72	3	1.10787	1.0942	0.905995	1.02019	1.03207	0.982855	0.881719	1.02755	0.927193	0.95483	0.223964
M1BIE3	Uncharacterized protein OS=Solanum tuberosum GN=PGSC0003DMG400017809 PE=4 SV=1 - [M1BIE3_SOLTU]	29.9385	6.55127	18.12	4	1.03493	0.951252	0.990124	0.961174	0.984371	1.04523	1.03716	1.03186	0.965517	1.01994	0.224092
M0ZWK3	Uncharacterized protein OS=Solanum tuberosum GN=PGSC0003DMG400003741 PE=4 SV=1 - [M0ZWK3_SOLTU]	19.7852	9.92041	5.56	1	1.04466	1.01644	0.996758	1.0176	1.01887	1.0039	0.95992	1.03593	0.947672	0.986855	0.224148
M1CRV0	Uncharacterized protein OS=Solanum tuberosum GN=PGSC0003DMG400028502 PE=3 SV=1 - [M1CRV0_SOLTU]	58.5657	6.68311	7.57	3	0.977155	0.898405	0.967743	1.03567	0.969742	1.00743	0.972029	1.01954	1.06961	1.01715	0.224669
K4BIB5	Uncharacterized protein OS=Solanum lycopersicum GN=Solyc03g083390.2 PE=4 SV=1 - [K4BIB5_SOLLC]	33.369	5.47803	5	1	0.933482	1.07125	0.88644	0.940532	0.957925	0.906419	1.06596	1.09349	1.08885	1.03868	0.224761
K4CR41	Uncharacterized protein OS=Solanum lycopersicum GN=Solyc09g010120.2 PE=4 SV=1 - [K4CR41_SOLLC]	20.9097	7.29834	4.21	1	0.993259	1.02109	1.00788	1.10223	1.03111	1.06052	0.982124	0.957011	0.889977	0.972408	0.225385
M1AY37	Uncharacterized protein OS=Solanum tuberosum GN=PGSC0003DMG400012601 PE=4 SV=1 - [M1AY37_SOLTU]	40.1282	7.60596	6.94	1	0.900178	0.81082	1.09981	1.02699	0.95945	1.19867	1.17538	0.93262	1.02001	1.08167	0.225731
M1A2V5	Superoxide dismutase OS=Solanum tuberosum GN=PGSC0003DMG400005247 PE=3 SV=1 - [M1A2V5_SOLTU]	33.0655	5.43994	13.4	1	1.01607	1.07157	0.936787	1.1057	1.03253	1.02073	0.957921	0.926466	0.990557	0.973918	0.226651
K4D943	Uncharacterized protein OS=Solanum lycopersicum GN=Solyc11g062320.1 PE=4 SV=1 - [K4D943_SOLLC]	33.8003	6.84424	3.29	1	1.05936	1.02292	0.923531	1.15693	1.04068	0.946733	0.837894	1.02864	1.0034	0.954165	0.227139
M1D357	Uncharacterized protein OS=Solanum tuberosum GN=PGSC0003DMG400031224 PE=4 SV=1 - [M1D357_SOLTU]	69.1433	5.75732	3.69	2	0.978808	0.833425	1.03867	0.872379	0.93082	0.969355	1.39177	0.940558	1.06393	1.0914	0.227885
Q9M726	SNF1 OS=Solanum lycopersicum GN=SNF1 PE=2 SV=1 - [Q9M726_SOLLC]	51.9568	8.19189	5.95	2	1.01802	1.01981	1.00152	1.07852	1.02947	1.05378	0.963513	0.999067	0.919231	0.983898	0.228074
M1C4Z5	Uncharacterized protein OS=Solanum tuberosum GN=PGSC0003DMG400023333 PE=4 SV=1 - [M1C4Z5_SOLTU]	19.6273	8.95361	6.67	1	1.01666	1.14666	1.06476	0.923243	1.03783	0.928479	0.93701	1.00697	0.991437	0.965974	0.228263
M1CDE1	Uncharacterized protein OS=Solanum tuberosum GN=PGSC0003DMG400025300 PE=4 SV=1 - [M1CDE1_SOLTU]	18.5659	4.7417	7.27	1	1.0265	1.00365	0.834159	1.00852	0.968207	1.01414	1.0754	1.00523	1.05264	1.03685	0.228644
F1B282	Cinnamate-4-hydroxylase 1 OS=Petunia hybrida GN=C4H1 PE=2 SV=1 - [F1B282_PETHY]	58.4479	9.1001	9.68	1	1.00742	0.940805	0.87578	1.03819	0.965548	0.949465	1.01443	1.05171	1.11486	1.03262	0.228933
M1C7V8	Uncharacterized protein OS=Solanum tuberosum GN=PGSC0003DMG400024011 PE=3 SV=1 - [M1C7V8_SOLTU]	6.10695	4.51318	24.14	1	0.981486	0.893044	0.835787	1.07706	0.946845	1.04163	0.940854	1.06111	1.07807	1.03042	0.23135
D1MAF2	Exportin-1 OS=Solanum lycopersicum GN=Xpo1 PE=2 SV=1 - [D1MAF2_SOLLC]	123.533	5.60498	0.74	1	1.18935	1.14226	1.01804	0.96957	1.0798	1.11426	1.06398	0.821051	0.790025	0.94733	0.232
M1D6S7	Uncharacterized protein OS=Solanum tuberosum GN=PGSC0003DMG400033142 PE=3 SV=1 - [M1D6S7_SOLTU]	9.52977	5.64307	18.39	1	0.899207	0.92547	0.963404	1.02926	0.954335	0.893198	1.13422	1.00861	1.1537	1.04743	0.23251
M1AFC7	Uncharacterized protein OS=Solanum tuberosum GN=PGSC0003DMG400008366 PE=4 SV=1 - [M1AFC7_SOLTU]	19.6721	11.356	10.47	2	0.972647	0.984065	0.897614	1.05196	0.976572	1.05356	0.965423	1.0792	1.02127	1.02986	0.234086
P11421	Ribulose bisphosphate carboxylase large chain OS=Nicotiana acuminata GN=rbcL PE=3 SV=1 - [RBL_NICAC]	13.3736	5.31299	62.39	1	1.10296	1.00569	0.911137	1.18376	1.05089	0.855462	0.910761	1.11231	0.886264	0.9412	0.234107
J7FTF2	Ribulose bisphosphate carboxylase large chain (Fragment) OS=Solanum lyratum PE=3 SV=1 - [J7FTF2_SOLLY]	6.51825	4.71631	65	1	1.07558	1.01935	0.955529	1.1737	1.05604	1.08327	0.91646	0.819628	1.01293	0.958073	0.2344
K4AYJ8	Uncharacterized protein OS=Solanum lycopersicum GN=Solyc01g088080.2 PE=3 SV=1 - [K4AYJ8_SOLLC]	45.2022	5.56689	22.38	9	1.02155	1.00317	1.02954	0.985001	1.00982	0.985514	0.994587	0.996333	1.00308	0.994878	0.234788
M1BZP9	Uncharacterized protein OS=Solanum tuberosum GN=PGSC0003DMG400022022 PE=4 SV=1 - [M1BZP9_SOLTU]	14.8646	9.89111	29.08	1	1.0977	0.967074	1.13327	1.03487	1.05823	1.00783	1.03091	1.03136	0.789643	0.964935	0.234878
M1B8P1	Uncharacterized protein OS=Solanum tuberosum GN=PGSC0003DMG400015360 PE=4 SV=1 - [M1B8P1_SOLTU]	19.3532	9.18799	10.61	2	1.12265	1.13244	0.919373	0.970181	1.03616	0.921714	0.893549	1.04087	0.950172	0.951576	0.235688
M1AHQ7	Uncharacterized protein OS=Solanum tuberosum GN=PGSC0003DMG400008934 PE=4 SV=1 - [M1AHQ7_SOLTU]	26.1718	6.06201	7	1	1.15312	1.01439	1.0315	0.956049	1.03877	0.865229	0.920144	0.949778	1.08774	0.955723	0.23574
Q9SXN6	Retinoblastoma-related protein 1 OS=Nicotiana tabacum GN=RB1 PE=2 SV=1 - [RBR1_TOBAC]	619.339	7.6792	14.95	14	1.057	1.03145	0.975804	1.09339	1.03941	1.07676	0.927345	1.00395	0.841161	0.962305	0.237368
M1AP15	Uncharacterized protein OS=Solanum tuberosum GN=PGSC0003DMG401010423 PE=3 SV=1 - [M1AP15_SOLTU]	17.1183	4.99561	5.84	1	1.06902	1.01996	1.11472	0.953314	1.03925	1.04079	0.972787	1.00235	0.903833	0.979941	0.237721
K4DAX8	Uncharacterized protein OS=Solanum lycopersicum GN=Solyc11g072710.1 PE=4 SV=1 - [K4DAX8_SOLLC]	107.476	6.94678	3.34	1	0.968368	0.906342	0.798034	1.11289	0.946409	1.03552	0.938822	1.15842	1.07776	1.05263	0.238302
M1AFX9	Uncharacterized protein OS=Solanum tuberosum GN=PGSC0003DMG400008513 PE=3 SV=1 - [M1AFX9_SOLTU]	11.7116	4.36084	6.78	1	0.902532	1.03034	0.840669	0.981772	0.938829	1.04368	0.893307	1.05227	1.0726	1.01546	0.240351
M1B2K4	Uncharacterized protein OS=Solanum tuberosum GN=PGSC0003DMG400013702 PE=4 SV=1 - [M1B2K4_SOLTU]	16.0895	8.14795	7.75	2	0.992334	1.07441	0.972402	1.13677	1.04398	0.955352	1.0693	0.991425	0.807811	0.955972	0.240707
K4D5R6	Uncharacterized protein OS=Solanum lycopersicum GN=Solyc11g011090.1 PE=4 SV=1 - [K4D5R6_SOLLC]	325.658	5.64307	0.31	1	0.912357	0.948227	0.96803	1.01852	0.961784	0.926873	0.990683	1.07189	1.16093	1.03759	0.240787
M1BZ05	Histone H2A OS=Solanum tuberosum GN=PGSC0003DMG400021806 PE=3 SV=1 - [M1BZ05_SOLTU]	1.19054	4.75439	91.67	1	0.943959	1.00165	0.840745	1.01047	0.949205	0.992133	0.916751	1.2061	1.0693	1.04607	0.24158
E0X585	Mitochondrial glycine decarboxylase complex P-protein-like protein OS=Nicotiana benthamiana GN=GDCP1 PE=2 SV=1 - [E0X585_NICBE]	37.5698	6.52197	37.43	3	1.03261	1.05674	0.970036	1.10133	1.04018	1.05581	0.940107	1.01749	0.940615	0.988505	0.241832
M1B103	Uncharacterized protein OS=Solanum tuberosum GN=PGSC0003DMG400013301 PE=4 SV=1 - [M1B103_SOLTU]	24.5377	5.73193	7.94	2	1.03771	0.958057	0.980992	0.949155	0.98148	0.982255	1.03742	0.985544	1.08133	1.02164	0.242048
K4BP08	Uncharacterized protein OS=Solanum lycopersicum GN=Solyc04g008520.2 PE=4 SV=1 - [K4BP08_SOLLC]	31.641	8.63135	2.87	1	0.878301	0.916086	1.11879	0.951366	0.966136	1.01044	1.12022	0.957208	1.13084	1.05468	0.242133
K4BG88	Uncharacterized protein OS=Solanum lycopersicum GN=Solyc03g044710.2 PE=4 SV=1 - [K4BG88_SOLLC]	44.9962	6.53662	3.17	1	0.960239	0.904636	1.13669	0.873337	0.968725	1.05151	1.1101	1.0003	1.06044	1.05559	0.242198
M1CE34	Uncharacterized protein OS=Solanum tuberosum GN=PGSC0003DMG400025473 PE=4 SV=1 - [M1CE34_SOLTU]	26.0017	9.18799	22.46	5	1.06737	1.01733	1.1653	1.00044	1.06261	0.952126	1.14566	0.889817	0.880694	0.967075	0.24222
M1ANW2	Malate dehydrogenase OS=Solanum tuberosum GN=PGSC0003DMG400010386 PE=3 SV=1 - [M1ANW2_SOLTU]	32.1266	6.75635	32.9	3	1.00867	1.02343	0.955111	1.06859	1.01395	0.905207	0.98103	1.00134	0.999375	0.971739	0.242447
A1XEK4	CYP71D51v2 OS=Nicotiana tabacum GN=CYP71D51 PE=2 SV=1 - [A1XEK4_TOBAC]	58.0744	8.27979	3.7	1	1.00275	1.00475	0.869888	0.970486	0.961969	0.90882	1.06579	1.04153	1.11932	1.03387	0.242637
K4CXS7	Uncharacterized protein OS=Solanum lycopersicum GN=Solyc10g007480.2 PE=4 SV=1 - [K4CXS7_SOLLC]	66.2983	6.7124	12.88	6	1.00486	1.00971	0.988865	1.07906	1.02063	1.0037	0.915436	1.02198	0.982187	0.980826	0.24306
O24131	Annexin OS=Nicotiana tabacum GN=X511 PE=2 SV=1 - [O24131_TOBAC]	35.8335	5.24951	16.56	1	1.08272	1.03445	0.933981	1.13021	1.04534	0.791677	0.873229	0.958924	1.1219	0.936432	0.243529
M1CBS3	Uncharacterized protein OS=Solanum tuberosum GN=PGSC0003DMG400024915 PE=3 SV=1 - [M1CBS3_SOLTU]	44.3987	10.0815	31.11	2	0.927138	0.995299	0.792685	1.03811	0.938308	1.02879	0.924335	1.2618	1.00806	1.05574	0.243697
M1AQN6	Uncharacterized protein OS=Solanum tuberosum GN=PGSC0003DMG400010825 PE=4 SV=1 - [M1AQN6_SOLTU]	31.3706	8.95361	5.09	1	1.00932	0.94882	0.98787	0.997437	0.985861	1.13458	1.03529	1.00515	0.973259	1.03707	0.244284
P93565	Fructose-bisphosphate aldolase (Fragment) OS=Solanum tuberosum PE=2 SV=1 - [P93565_SOLTU]	38.4608	6.13818	45.38	2	1.01235	0.957551	0.993192	1.13798	1.02527	0.933299	0.912877	1.05198	0.94286	0.960253	0.244687
B6EWY7	UDP-glucose:glucosyltransferase OS=Lycium barbarum GN=UGT73A12 PE=2 SV=1 - [B6EWY7_LYCBA]	53.8332	5.51611	1.47	1	0.926865	1.1282	1.21748	1.05791	1.08261	0.955868	1.1785	0.855079	0.804358	0.948451	0.244826
M1D5K4	Uncharacterized protein OS=Solanum tuberosum GN=PGSC0003DMG400032248 PE=4 SV=1 - [M1D5K4_SOLTU]	22.6575	6.68311	11.76	3	0.980754	0.933037	0.862733	1.02305	0.949894	0.968905	0.923398	1.08513	1.13841	1.02896	0.245536
K4BEF6	Uncharacterized protein OS=Solanum lycopersicum GN=Solyc03g007330.2 PE=3 SV=1 - [K4BEF6_SOLLC]	89.0899	6.29053	1.23	1	0.903871	0.833837	1.09776	0.991176	0.956661	1.05003	1.22233	0.89503	1.1202	1.0719	0.245949
K4B292	Ubiquinol oxidase OS=Solanum lycopersicum GN=Solyc01g105220.2 PE=3 SV=1 - [K4B292_SOLLC]	39.8793	8.45557	8.05	1	1.04978	0.939897	0.830658	0.981216	0.950388	1.00315	0.93871	1.03223	1.20359	1.04442	0.246041
P30170	Actin-85C (Fragment) OS=Solanum tuberosum GN=AC85C PE=3 SV=1 - [ACT10_SOLTU]	21.681	6.34131	58.46	2	0.990793	1.05579	0.98395	1.01655	1.01177	0.988617	0.992962	1.01025	0.945829	0.984414	0.246826
E9NMH3	Aquaporin OS=Solanum lycopersicum PE=2 SV=1 - [E9NMH3_SOLLC]	6.79358	4.64014	21.67	1	0.892293	0.678876	1.04126	1.02403	0.909116	0.89225	1.07159	1.06366	1.1209	1.0371	0.247073
P42056	Mitochondrial outer membrane protein porin of 36 kDa OS=Solanum tuberosum PE=1 SV=2 - [VDAC2_SOLTU]	29.3762	8.06006	15.22	3	1.09142	1.07496	0.904992	1.05377	1.03129	0.974827	0.916491	0.987447	0.995317	0.968521	0.247091
B6RQ70	Asr2 OS=Solanum lycopersicum GN=Asr2 PE=4 SV=1 - [B6RQ70_SOLLC]	27.6406	4.89404	12.5	2	1.17209	1.05384	0.870747	1.06564	1.04058	0.931781	0.801555	0.992709	1.02547	0.93788	0.247457
M1AVU1	Uncharacterized protein OS=Solanum tuberosum GN=PGSC0003DMG400012101 PE=4 SV=1 - [M1AVU1_SOLTU]	12.9039	10.4038	24.11	1	0.983331	0.989593	0.876477	0.941572	0.947743	1.07539	0.847892	1.14452	1.11578	1.04589	0.248603
M1CZN7	Uncharacterized protein OS=Solanum tuberosum GN=PGSC0003DMG400030440 PE=4 SV=1 - [M1CZN7_SOLTU]	11.0769	9.75928	8.65	2	1.05301	1.17511	0.955891	0.963662	1.03692	1.02303	0.89918	0.995778	0.920166	0.959538	0.248988
M0ZHR2	Uncharacterized protein OS=Solanum tuberosum GN=PGSC0003DMG400000378 PE=3 SV=1 - [M0ZHR2_SOLTU]	33.663	6.39209	3.62	1	0.981846	0.95064	0.982208	0.997932	0.978157	0.992621	0.948249	1.09104	1.07609	1.027	0.249567
M1B1C5	Uncharacterized protein OS=Solanum tuberosum GN=PGSC0003DMG400013389 PE=4 SV=1 - [M1B1C5_SOLTU]	38.0968	8.99756	19.23	4	1.08513	0.955208	0.968867	1.04201	1.0128	0.896225	0.888772	1.04448	0.976587	0.951517	0.249897
K4AVP3	Uncharacterized protein OS=Solanum lycopersicum GN=Solyc01g056780.2 PE=3 SV=1 - [K4AVP3_SOLLC]	12.4983	11.8101	5.83	1	0.841966	1.19284	0.908038	0.846773	0.947404	1.0903	1.19234	0.96975	1.03796	1.07259	0.249935
K4B103	ATP-dependent Clp protease proteolytic subunit OS=Solanum lycopersicum GN=Solyc01g099690.2 PE=3 SV=1 - [K4B103_SOLLC]	35.978	6.80029	8.59	3	0.860042	0.874552	1.14474	0.959078	0.959603	1.03594	1.21381	0.96067	1.05901	1.06736	0.250362
K4C2I7	Uncharacterized protein OS=Solanum lycopersicum GN=Solyc05g055100.1 PE=4 SV=1 - [K4C2I7_SOLLC]	83.205	6.50732	1.41	1	1.00072	0.997286	0.931548	1.02034	0.987474	1.07097	0.970005	1.02658	1.02637	1.02348	0.250561
M1CFT3	Uncharacterized protein OS=Solanum tuberosum GN=PGSC0003DMG400025879 PE=4 SV=1 - [M1CFT3_SOLTU]	24.8886	5.30029	9.13	2	1.10616	1.07625	0.933128	1.0304	1.03648	0.921376	0.925374	1.00519	1.04553	0.974368	0.25065
O04002	CDSP32 protein (Chloroplast Drought-induced Stress Protein of 32kDa) OS=Solanum tuberosum PE=2 SV=2 - [O04002_SOLTU]	13.7001	6.78564	13.33	2	1.04898	1.02929	1.14775	1.02392	1.06249	1.08331	1.03824	0.954776	0.763054	0.959846	0.251097
M1AD80	Uncharacterized protein OS=Solanum tuberosum GN=PGSC0003DMG403007838 PE=4 SV=1 - [M1AD80_SOLTU]	55.1732	7.78174	6.29	2	1.04574	0.9848	1.15617	0.967742	1.03861	0.854342	0.973898	1.00167	1.03173	0.965411	0.251708
M1C511	Uncharacterized protein OS=Solanum tuberosum GN=PGSC0003DMG400023340 PE=4 SV=1 - [M1C511_SOLTU]	52.9069	8.6167	2.75	1	0.955349	0.928672	1.06302	0.937295	0.971085	1.0539	1.18552	0.926002	1.03897	1.0511	0.252257
M1C9W0	Uncharacterized protein OS=Solanum tuberosum GN=PGSC0003DMG400024503 PE=3 SV=1 - [M1C9W0_SOLTU]	49.7461	6.12549	14.13	5	1.0117	1.03142	0.969439	1.05346	1.01651	0.996584	0.940319	1.03554	0.948469	0.980228	0.252387
K4B046	Uncharacterized protein OS=Solanum lycopersicum GN=Solyc01g096580.2 PE=3 SV=1 - [K4B046_SOLLC]	13.1101	9.67139	27.35	3	0.935379	1.07441	0.844313	0.983845	0.959488	1.06797	0.93738	1.06057	1.06887	1.0337	0.252838
K4DFB5	Uncharacterized protein OS=Solanum lycopersicum GN=Solyc12g044270.1 PE=4 SV=1 - [K4DFB5_SOLLC]	58.7928	5.41455	1.33	1	1.02724	1.07996	0.944804	1.12184	1.04346	1.04285	0.880347	1.03769	0.933727	0.973653	0.253568
B5LAU8	Putative ferredoxin-dependent glutamate synthase 1 OS=Capsicum annuum PE=2 SV=1 - [B5LAU8_CAPAN]	177.609	6.53662	17.6	5	0.981732	1.04585	0.972651	1.0459	1.01153	1.00291	0.994367	0.979579	0.949838	0.981675	0.253961
M1A5I0	Uncharacterized protein OS=Solanum tuberosum GN=PGSC0003DMG401005911 PE=3 SV=1 - [M1A5I0_SOLTU]	17.6494	10.4917	41.51	7	0.932069	1.08927	0.860326	0.917255	0.949731	1.04169	0.904462	1.1353	1.06451	1.03649	0.254265
M1BPR5	Uncharacterized protein OS=Solanum tuberosum GN=PGSC0003DMG400019448 PE=3 SV=1 - [M1BPR5_SOLTU]	31.0414	6.41748	10.27	4	1.08231	1.05923	0.87925	1.15211	1.04322	0.887094	0.898963	1.05404	0.97549	0.953896	0.254653
K4BIC8	Uncharacterized protein OS=Solanum lycopersicum GN=Solyc03g083520.2 PE=4 SV=1 - [K4BIC8_SOLLC]	16.9167	5.04639	45.33	2	0.988718	1.0667	1.04188	1.05621	1.03838	1.06318	1.0136	0.869105	0.970317	0.979051	0.255192
K4BPG2	Uncharacterized protein OS=Solanum lycopersicum GN=Solyc04g010070.2 PE=4 SV=1 - [K4BPG2_SOLLC]	55.1358	5.50342	7.08	2	1.01305	0.93917	1.18725	1.02809	1.04189	0.944382	0.987139	0.959155	0.983258	0.968483	0.25537
P46300	40S ribosomal protein S4 OS=Solanum tuberosum GN=RPS4 PE=2 SV=1 - [RS4_SOLTU]	29.9392	10.2866	17.05	2	0.948916	1.02704	0.88237	1.00898	0.966825	1.10162	0.92382	1.12254	1.00581	1.03845	0.2556
Q94JN9	Osmotin OS=Petunia hybrida GN=OSM PE=2 SV=1 - [Q94JN9_PETHY]	25.7561	8.04541	16.25	3	1.02704	1.06639	0.828549	0.939457	0.96536	0.944468	1.08134	1.02066	1.17719	1.05591	0.256168
K4BQ85	Uncharacterized protein OS=Solanum lycopersicum GN=Solyc04g015830.2 PE=4 SV=1 - [K4BQ85_SOLLC]	103.948	5.75732	3.27	3	0.996049	1.07723	0.951548	1.08502	1.02746	0.962789	0.971112	0.97541	1.0168	0.981527	0.256949
M1CE55	Uncharacterized protein OS=Solanum tuberosum GN=PGSC0003DMG400025492 PE=3 SV=1 - [M1CE55_SOLTU]	35.9982	7.57666	8.54	3	0.861573	0.94706	1.02095	1.03063	0.965054	1.06087	1.30083	0.977219	0.970934	1.07746	0.257527
Q1L5V8	Sucrose synthase (Fragment) OS=Nicotiana langsdorffii x Nicotiana sanderae GN=SUSY1 PE=2 SV=1 - [Q1L5V8_NICLS]	40.71	6.46826	15.73	1	0.912394	0.836491	0.854171	1.10433	0.926847	0.909078	1.04816	0.981552	1.32723	1.0665	0.258024
K4CXP5	Uncharacterized protein OS=Solanum lycopersicum GN=Solyc10g007150.2 PE=4 SV=1 - [K4CXP5_SOLLC]	61.3238	8.45557	1.27	1	0.917499	1.07038	0.829566	0.997483	0.953731	1.00003	0.927459	1.13468	1.10571	1.04197	0.25806
K4C9N2	Uncharacterized protein OS=Solanum lycopersicum GN=Solyc06g075160.2 PE=4 SV=1 - [K4C9N2_SOLLC]	93.0985	4.67822	1.19	1	0.891506	1.00015	0.885966	1.10417	0.970447	1.06937	1.04321	1.05106	1.00787	1.04288	0.258155
K4AZX9	Uncharacterized protein OS=Solanum lycopersicum GN=Solyc01g095900.2 PE=4 SV=1 - [K4AZX9_SOLLC]	208.877	6.93213	3.32	4	0.968954	1.03136	1.25348	1.03182	1.0714	0.990443	1.11299	0.927263	0.813826	0.96113	0.258289
K4DC48	Uncharacterized protein OS=Solanum lycopersicum GN=Solyc12g009600.1 PE=4 SV=1 - [K4DC48_SOLLC]	22.7057	6.7417	7.62	2	1.05801	1.10258	0.920264	1.09087	1.04293	1.06681	0.926083	1.00318	0.884295	0.970094	0.258603
Q6E4P3	Carotenoid cleavage dioxygenase 1 OS=Petunia hybrida GN=CCD1 PE=2 SV=1 - [Q6E4P3_PETHY]	61.2721	6.26514	11.9	6	0.983761	1.02039	0.980683	1.03417	1.00475	1.01623	0.961035	0.964959	0.985224	0.981863	0.25896
K4BDH8	Uncharacterized protein OS=Solanum lycopersicum GN=Solyc02g093820.2 PE=4 SV=1 - [K4BDH8_SOLLC]	26.7976	5.23682	2.92	1	0.930107	1.06672	0.990381	0.889826	0.969257	1.00041	1.15251	0.939263	1.08842	1.04515	0.260374
K4C601	Uncharacterized protein OS=Solanum lycopersicum GN=Solyc06g053140.2 PE=4 SV=1 - [K4C601_SOLLC]	25.7453	8.77783	12.99	2	1.06007	0.880525	1.18609	1.03616	1.04071	0.91108	1.04544	0.863916	0.968233	0.947167	0.261054
M1ATA4	Uncharacterized protein OS=Solanum tuberosum GN=PGSC0003DMG400011422 PE=4 SV=1 - [M1ATA4_SOLTU]	32.9927	7.7085	7.77	1	1.09615	0.935143	1.25368	0.970068	1.06376	0.932152	1.00132	0.82486	1.05602	0.953589	0.261139
A9XLE0	Uncharacterized protein OS=Capsicum frutescens GN=6.PEPPER.4 PE=4 SV=1 - [A9XLE0_CAPFR]	31.6742	5.07178	4.78	1	0.994876	0.943995	1.15428	1.02707	1.03005	0.988546	1.01414	0.97454	0.864913	0.960534	0.261577
K4BV58	Uncharacterized protein OS=Solanum lycopersicum GN=Solyc04g079790.2 PE=3 SV=1 - [K4BV58_SOLLC]	19.6696	10.0376	14.69	1	0.882533	1.10416	0.965533	0.931854	0.971021	1.04889	1.02455	1.11907	0.97514	1.04191	0.262109
M1AZ76	Uncharacterized protein OS=Solanum tuberosum GN=PGSC0003DMG400012857 PE=4 SV=1 - [M1AZ76_SOLTU]	54.4667	4.79248	2.5	1	0.937631	1.00062	0.958357	1.04029	0.984224	0.966785	1.06572	1.02146	1.03554	1.02238	0.262346
Q75QH1	Pathogenesis-related protein 4b (Fragment) OS=Capsicum chinense GN=PR4b-Cc PE=2 SV=1 - [Q75QH1_CAPCH]	21.7093	7.66455	3.45	1	0.865905	1.09367	0.761277	0.970177	0.922757	0.898904	0.930484	1.20749	1.19805	1.05873	0.262365
K4ATT8	Uncharacterized protein OS=Solanum lycopersicum GN=Solyc01g010950.2 PE=3 SV=1 - [K4ATT8_SOLLC]	48.4101	8.60205	4.19	2	1.07048	1.26318	0.934517	0.991935	1.06503	1.08573	0.953474	0.940377	0.843219	0.955699	0.26243
M1BWL4	Uncharacterized protein OS=Solanum tuberosum GN=PGSC0003DMG400021189 PE=4 SV=1 - [M1BWL4_SOLTU]	11.9606	10.5356	26.85	1	1.00546	1.09919	0.812088	0.845505	0.94056	1.07244	0.90316	1.03223	1.21597	1.05595	0.262987
M1B1W7	Uncharacterized protein OS=Solanum tuberosum GN=PGSC0003DMG400013515 PE=4 SV=1 - [M1B1W7_SOLTU]	21.7842	7.92822	5.64	1	0.990259	1.09305	1.06588	0.982429	1.0329	0.849787	0.96523	0.970969	1.07494	0.965232	0.263451
M0ZM42	UDP-glucose 6-dehydrogenase OS=Solanum tuberosum GN=PGSC0003DMG400001448 PE=3 SV=1 - [M0ZM42_SOLTU]	52.71	6.65381	17.08	2	1.10187	0.979003	0.965343	1.0965	1.03568	1.00721	1.00821	1.00813	0.873823	0.974345	0.264217
Q9LEC8	Glutamate dehydrogenase B OS=Nicotiana plumbaginifolia GN=GDHB PE=2 SV=1 - [DHEB_NICPL]	38.1626	7.00537	9.69	1	0.933072	0.880845	1.10379	0.971132	0.97221	0.951468	1.17606	1.00833	1.08745	1.05583	0.266071
M1D0W4	Uncharacterized protein OS=Solanum tuberosum GN=PGSC0003DMG401030700 PE=4 SV=1 - [M1D0W4_SOLTU]	125.678	7.31299	1.19	1	1.16583	1.04051	1.04446	0.905028	1.03896	0.929267	0.970168	0.931296	1.02657	0.964326	0.266261
K4CC36	Uncharacterized protein OS=Solanum lycopersicum GN=Solyc07g009170.2 PE=4 SV=1 - [K4CC36_SOLLC]	41.5498	7.28369	2.72	1	0.86351	0.985045	1.17326	0.757728	0.944886	1.03801	1.31836	1.00385	0.997487	1.08943	0.266391
K4D5S8	Uncharacterized protein OS=Solanum lycopersicum GN=Solyc11g011220.1 PE=4 SV=1 - [K4D5S8_SOLLC]	53.5429	6.68311	1.88	1	1.14505	1.09091	0.961547	1.00501	1.05063	1.04914	0.745574	0.997641	1.00682	0.949795	0.266429
M1BA27	Uncharacterized protein OS=Solanum tuberosum GN=PGSC0003DMG400015685 PE=3 SV=1 - [M1BA27_SOLTU]	16.0866	10.3599	13.1	2	1.0114	1.03666	0.813011	0.990643	0.962929	1.1031	0.936946	1.1016	1.02677	1.0421	0.266897
K4C7X1	Uncharacterized protein OS=Solanum lycopersicum GN=Solyc06g067960.2 PE=4 SV=1 - [K4C7X1_SOLLC]	12.3604	5.47803	8.18	1	1.10149	1.16306	0.892192	1.01112	1.04196	1.00807	0.881304	0.934327	1.00822	0.957981	0.267608
M0ZJU5	Uncharacterized protein OS=Solanum tuberosum GN=PGSC0003DMG400000861 PE=4 SV=1 - [M0ZJU5_SOLTU]	47.3777	6.11279	2.25	1	0.972764	1.06802	0.971321	1.07953	1.02291	0.95109	0.983777	0.983169	1.0098	0.98196	0.268015
M1CC30	Uncharacterized protein OS=Solanum tuberosum GN=PGSC0003DMG400024973 PE=4 SV=1 - [M1CC30_SOLTU]	12.6323	7.69385	10.62	1	1.02471	0.967321	0.726148	0.995429	0.928401	0.984149	0.876025	1.13193	1.23053	1.05566	0.268047
K4CWJ3	Uncharacterized protein OS=Solanum lycopersicum GN=Solyc09g091670.2 PE=4 SV=1 - [K4CWJ3_SOLLC]	161.073	6.49365	4.34	1	0.943329	0.977885	1.04704	0.894003	0.965563	0.972094	1.17771	0.929776	1.12066	1.05006	0.268392
M1BAK6	Uncharacterized protein OS=Solanum tuberosum GN=PGSC0003DMG400015804 PE=4 SV=1 - [M1BAK6_SOLTU]	49.4631	6.21436	20.5	9	0.965323	1.03947	0.926175	1.0254	0.98909	1.01723	0.986323	1.03171	1.08629	1.03039	0.268516
M1C5K2	Uncharacterized protein OS=Solanum tuberosum GN=PGSC0003DMG402023454 PE=4 SV=1 - [M1C5K2_SOLTU]	20.1903	10.2427	4.88	1	1.15227	1.14896	1.02797	0.976695	1.07647	1.16031	0.966052	0.95154	0.726826	0.951182	0.268542
K4BW79	Uncharacterized protein OS=Solanum lycopersicum GN=Solyc05g005480.2 PE=4 SV=1 - [K4BW79_SOLLC]	40.9759	8.08936	20.88	7	1.00802	1.02741	1.00488	1.02477	1.01627	1.03278	0.941298	1.01876	0.924825	0.979416	0.268943
Q6SKP4	Ribosomal protein L3 OS=Solanum lycopersicum GN=RPL3 PE=2 SV=1 - [Q6SKP4_SOLLC]	13.5313	9.99365	46.67	2	0.983623	0.937589	0.882935	1.01588	0.955007	1.07885	0.901915	1.16573	0.993924	1.0351	0.269249
M1CKB2	40S ribosomal protein SA OS=Solanum tuberosum GN=PGSC0003DMG400026970 PE=3 SV=1 - [M1CKB2_SOLTU]	32.4732	5.08447	29.77	2	0.96721	0.995215	0.932084	1.0553	0.987451	1.03663	0.955885	1.07158	1.06786	1.03299	0.269339
K4B3P9	Fructose-bisphosphate aldolase OS=Solanum lycopersicum GN=Solyc01g110360.2 PE=3 SV=1 - [K4B3P9_SOLLC]	6.74854	8.1626	25	1	1.03395	1.07056	0.907068	1.04796	1.01488	1.0049	0.881639	0.994531	0.952208	0.958319	0.269485
M1CY05	Uncharacterized protein OS=Solanum tuberosum GN=PGSC0003DMG400030011 PE=4 SV=1 - [M1CY05_SOLTU]	26.2312	9.05615	5.15	1	1.17569	1.13855	0.876661	0.984528	1.04386	0.91827	0.939475	0.950034	0.990856	0.949659	0.269582
M1DNE3	Non-specific lipid-transfer protein OS=Solanum tuberosum GN=PGSC0003DMG400041359 PE=3 SV=1 - [M1DNE3_SOLTU]	13.0558	8.71924	7.26	1	0.96532	1.01123	0.854881	0.9017	0.933283	0.883665	0.926301	1.2001	1.18698	1.04926	0.269932
M1B8D0	Uncharacterized protein OS=Solanum tuberosum GN=PGSC0003DMG400015269 PE=4 SV=1 - [M1B8D0_SOLTU]	39.6488	5.75732	8.88	1	1.01434	1.02446	0.928966	1.17315	1.03523	0.926212	0.909993	0.9281	1.06862	0.958231	0.270076
M1CNU7	Uncharacterized protein OS=Solanum tuberosum GN=PGSC0003DMG400027809 PE=4 SV=1 - [M1CNU7_SOLTU]	15.4246	5.03369	9.22	1	0.928946	0.908871	1.08025	0.902399	0.955116	1.01951	1.23357	0.867465	1.15475	1.06882	0.270858
M1A8S6	Serine/threonine-protein phosphatase OS=Solanum tuberosum GN=PGSC0003DMG400006739 PE=3 SV=1 - [M1A8S6_SOLTU]	29.5161	6.75635	10.38	1	1.12167	1.0188	0.994341	0.995472	1.03257	1.01746	1.01511	0.999618	0.890408	0.98065	0.270983
K4CLR1	Uncharacterized protein OS=Solanum lycopersicum GN=Solyc08g066850.2 PE=4 SV=1 - [K4CLR1_SOLLC]	33.385	6.16357	5	1	1.06056	0.917679	0.999302	1.18331	1.04021	0.917382	0.975421	0.990449	0.973886	0.964284	0.271522
K4CMQ7	Uncharacterized protein OS=Solanum lycopersicum GN=Solyc08g075400.2 PE=4 SV=1 - [K4CMQ7_SOLLC]	13.4191	10.0083	6.45	1	1.03709	1.03512	0.904292	0.891015	0.966881	0.930291	1.07668	1.03524	1.08376	1.03149	0.272904
M0ZL78	Uncharacterized protein OS=Solanum tuberosum GN=PGSC0003DMG400001252 PE=4 SV=1 - [M0ZL78_SOLTU]	40.2096	8.30908	10.16	3	1.00674	1.17385	0.966038	1.0111	1.03943	0.965014	0.893849	1.05895	0.961852	0.969917	0.272943
M1BPZ4	Uncharacterized protein OS=Solanum tuberosum GN=PGSC0003DMG400019510 PE=4 SV=1 - [M1BPZ4_SOLTU]	51.2002	8.92432	31.25	8	1.01114	0.96104	0.926369	1.04604	0.986149	1.04916	1.07937	1.07174	0.943325	1.0359	0.273607
M0ZRR2	Uncharacterized protein OS=Solanum tuberosum GN=PGSC0003DMG400002581 PE=4 SV=1 - [M0ZRR2_SOLTU]	24.8775	7.23975	3	1	1.10495	1.06987	0.950449	0.992597	1.02947	1.00703	0.950149	1.02915	0.921253	0.976896	0.274055
M1A0Y3	L-lactate dehydrogenase OS=Solanum tuberosum GN=PGSC0003DMG400004800 PE=3 SV=1 - [M1A0Y3_SOLTU]	37.5778	6.96143	6	2	0.999304	0.946272	0.948219	1.01366	0.976863	0.999962	1.02638	0.956909	1.14125	1.03113	0.274173
K4C7G8	Uncharacterized protein OS=Solanum lycopersicum GN=Solyc06g065390.2 PE=3 SV=1 - [K4C7G8_SOLLC]	17.1293	9.5542	9.87	2	0.966761	0.933514	0.894966	1.07191	0.966787	1.04351	1.10022	1.12816	0.901463	1.04334	0.274401
K4D681	Uncharacterized protein OS=Solanum lycopersicum GN=Solyc11g012770.1 PE=4 SV=1 - [K4D681_SOLLC]	186.847	6.52197	0.54	1	1.07207	0.927074	1.06713	1.04837	1.02866	0.913456	1.06733	0.944315	0.959532	0.971158	0.275008
K4BQC6	Uncharacterized protein OS=Solanum lycopersicum GN=Solyc04g016260.2 PE=3 SV=1 - [K4BQC6_SOLLC]	100.848	6.56592	1.08	1	0.967094	0.991597	0.988892	1.11759	1.01629	0.959907	0.890949	1.01089	0.994536	0.96407	0.276071
K4CHI2	Uncharacterized protein OS=Solanum lycopersicum GN=Solyc07g065030.2 PE=4 SV=1 - [K4CHI2_SOLLC]	23.1272	9.0708	4.78	1	1.05318	1.14885	0.946108	0.97216	1.03007	0.945729	0.9333	1.0131	0.979997	0.968031	0.276467
Q2XTB2	40S ribosomal protein S10-like OS=Solanum tuberosum GN=PGSC0003DMG400024757 PE=2 SV=1 - [Q2XTB2_SOLTU]	20.1151	9.72998	37.36	3	0.98951	1.0289	0.884098	0.989958	0.973118	1.04521	0.935153	1.07518	1.04653	1.02552	0.276955
A5JGX6	RAN GTPase-activating protein 2 OS=Nicotiana benthamiana GN=RanGAP2 PE=2 SV=1 - [A5JGX6_NICBE]	59.154	4.85596	3.15	1	0.98607	1.01623	0.88837	1.01297	0.97591	0.961886	0.997337	1.07115	1.06445	1.0237	0.277777
Q07A14	Putative sugar transporter OS=Nicotiana langsdorffii x Nicotiana sanderae PE=2 SV=1 - [Q07A14_NICLS]	58.9247	9.02686	1.81	1	0.905357	1.03116	1.12684	1.09669	1.04001	0.899372	0.972825	1.05163	0.952795	0.969156	0.277988
J7QV76	Ribulose bisphosphate carboxylase large chain (Fragment) OS=Datura stramonium subsp. stramonium GN=rbcL PE=3 SV=1 - [J7QV76_DATST]	21.7251	8.22119	42.49	1	1.11707	1.0149	0.985435	1.0425	1.03998	0.981996	0.896065	1.11109	0.866608	0.96394	0.278157
K4C4E5	Uncharacterized protein OS=Solanum lycopersicum GN=Solyc06g019200.2 PE=4 SV=1 - [K4C4E5_SOLLC]	51.0126	5.45264	1.5	1	0.926583	0.957926	0.959144	0.91338	0.939258	0.998663	0.962894	0.947218	1.33602	1.0612	0.278427
G3M3X3	Delta-1-pyrroline-5-carboxylate synthetase OS=Solanum torvum GN=P5CS PE=2 SV=1 - [G3M3X3_9SOLN]	77.825	6.72705	9.9	4	1.00779	0.931274	1.10144	1.06643	1.02673	0.945512	0.976703	0.96654	1.0168	0.976389	0.278715
Q2VCI3	60S ribosomal protein L7A-like OS=Solanum tuberosum PE=2 SV=1 - [Q2VCI3_SOLTU]	29.3535	10.3013	32.82	1	1.05636	1.01547	0.997382	0.755761	0.956244	0.970537	1.13554	1.14146	0.977065	1.05615	0.278833
M1AZ96	Uncharacterized protein OS=Solanum tuberosum GN=PGSC0003DMG401012873 PE=4 SV=1 - [M1AZ96_SOLTU]	45.9087	6.48096	3.46	1	0.98877	0.996632	0.926887	1.02384	0.984032	0.962895	1.04449	1.00785	1.06604	1.02032	0.279425
Q5QJA7	Harpin binding protein 1 OS=Solanum tuberosum GN=HrBP1 PE=2 SV=1 - [Q5QJA7_SOLTU]	30.0727	8.1626	9.09	2	1.1613	0.976816	1.04844	0.976934	1.04087	1.03858	0.967122	0.999004	0.910239	0.978735	0.27962
M1ANN8	Uncharacterized protein OS=Solanum tuberosum GN=PGSC0003DMG400010333 PE=4 SV=1 - [M1ANN8_SOLTU]	37.1403	6.02393	20.92	5	1.01043	0.968658	0.951936	1.00239	0.983352	1.04839	0.927602	1.08676	1.06101	1.03094	0.280011
M0ZZG9	Uncharacterized protein OS=Solanum tuberosum GN=PGSC0003DMG400004454 PE=4 SV=1 - [M0ZZG9_SOLTU]	32.6238	7.10791	7.77	2	1.03962	0.952396	1.0923	1.03257	1.02922	1.00387	1.03225	0.971248	0.941462	0.987206	0.280229
M1C6Y9	Uncharacterized protein OS=Solanum tuberosum GN=PGSC0003DMG400023753 PE=4 SV=1 - [M1C6Y9_SOLTU]	16.2495	6.82959	17.48	2	1.05673	0.975133	1.28629	0.970883	1.07226	0.954578	1.17068	0.793508	0.836847	0.938903	0.280554
K4B3R3	Uncharacterized protein OS=Solanum lycopersicum GN=Solyc01g110500.2 PE=4 SV=1 - [K4B3R3_SOLLC]	30.7603	6.25244	2.65	1	0.998329	1.02859	0.811324	0.97617	0.953605	1.01849	0.978612	0.974158	1.1381	1.02734	0.280669
Q6STL6	Cysteine synthase (Fragment) OS=Nicotiana plumbaginifolia GN=Cs1 PE=2 SV=1 - [Q6STL6_NICPL]	34.015	5.8335	26.32	4	0.950257	1.0567	1.15044	0.964819	1.03055	0.971577	1.06884	0.76278	0.9417	0.936225	0.281265
M1D982	Uncharacterized protein OS=Solanum tuberosum GN=PGSC0003DMG400034882 PE=3 SV=1 - [M1D982_SOLTU]	54.2676	5.41455	1.65	1	1.03705	0.988099	1.18142	0.986275	1.04821	0.941814	1.08968	0.983766	0.874271	0.972383	0.28361
K4BT70	Uncharacterized protein OS=Solanum lycopersicum GN=Solyc04g064790.2 PE=4 SV=1 - [K4BT70_SOLLC]	75.046	6.65381	1.7	1	0.899548	0.949462	0.981838	0.984337	0.953796	0.837659	1.138	1.1067	1.09997	1.04558	0.283904
K4DBM4	Uncharacterized protein OS=Solanum lycopersicum GN=Solyc12g006870.1 PE=4 SV=1 - [K4DBM4_SOLLC]	27.1935	6.37939	5.08	1	1.06261	1.08392	0.918836	1.05805	1.03086	1.01513	0.914547	1.03789	0.92459	0.973039	0.284508
C0LLS3	Putative proline-rich protein OS=Petunia hybrida PE=2 SV=1 - [C0LLS3_PETHY]	27.4166	9.93506	12.89	3	0.90788	1.15501	0.802708	0.884645	0.93756	1.04147	0.950092	1.05574	1.10996	1.03932	0.285081
Q40401	Calreticulin OS=Nicotiana plumbaginifolia GN=CAL1 PE=2 SV=1 - [CALR_NICPL]	47.4517	4.61475	14.18	6	0.958498	1.08441	0.873864	0.975273	0.973011	1.01528	0.972619	1.04036	1.11188	1.03504	0.28544
K4CPC2	Uncharacterized protein OS=Solanum lycopersicum GN=Solyc08g081250.2 PE=4 SV=1 - [K4CPC2_SOLLC]	113.085	6.66846	5.71	5	1.02334	0.968939	1.02742	1.03487	1.01364	0.995326	0.997855	0.977268	1.00409	0.993635	0.285526
M1CEB2	Uncharacterized protein OS=Solanum tuberosum GN=PGSC0003DMG400025517 PE=4 SV=1 - [M1CEB2_SOLTU]	34.6043	6.03662	2.56	1	1.0831	1.07708	0.953167	0.972935	1.02157	0.933151	0.936088	0.964054	1.04851	0.97045	0.285826
M1AK55	Uncharacterized protein OS=Solanum tuberosum GN=PGSC0003DMG400009458 PE=4 SV=1 - [M1AK55_SOLTU]	54.6973	5.89697	8.83	3	1.01708	1.05239	1.10479	0.943816	1.02952	0.943827	0.829511	1.0054	1.05734	0.95902	0.286371
P14903	Fruit-specific protein OS=Solanum lycopersicum GN=2A11 PE=1 SV=1 - [FSPM_SOLLC]	484.973	6.29053	24.02	27	1.04328	1.00591	1.04195	1.02195	1.02827	1.04697	0.993826	1.00476	0.872564	0.979529	0.286578
M0ZU48	Uncharacterized protein OS=Solanum tuberosum GN=PGSC0003DMG400003141 PE=4 SV=1 - [M0ZU48_SOLTU]	17.737	4.65283	5.16	1	0.937715	0.900097	1.04568	1.04774	0.982807	1.1427	0.995485	1.00625	1.0245	1.04223	0.286621
K4BJG4	Uncharacterized protein OS=Solanum lycopersicum GN=Solyc03g097470.2 PE=3 SV=1 - [K4BJG4_SOLLC]	44.5534	6.52197	5.71	2	0.996088	1.01966	1.10826	0.938744	1.01569	0.991009	1.14933	1.08677	1.06043	1.07188	0.287364
M1CSW6	Uncharacterized protein OS=Solanum tuberosum GN=PGSC0003DMG400028737 PE=3 SV=1 - [M1CSW6_SOLTU]	67.5276	8.54346	1.88	1	1.04194	0.9301	0.891087	1.01179	0.968729	0.99088	0.950758	1.04545	1.13378	1.03022	0.289683
O82064	Putative beta-subunit of K+ channels OS=Solanum tuberosum GN=kb1 PE=2 SV=1 - [O82064_SOLTU]	19.8684	9.0708	4.44	1	0.970111	1.01184	1.03002	1.13251	1.03612	0.922193	1.05276	0.883809	1.03474	0.973374	0.290743
K4BJV9	Nucleoside diphosphate kinase OS=Solanum lycopersicum GN=Solyc03g110960.2 PE=3 SV=1 - [K4BJV9_SOLLC]	25.5151	8.45557	21.46	1	0.924283	0.962617	0.900382	1.08716	0.968612	1.11425	0.936912	1.1427	0.982268	1.04403	0.291248
K4AWI1	Uncharacterized protein OS=Solanum lycopersicum GN=Solyc01g065780.1 PE=4 SV=1 - [K4AWI1_SOLLC]	7.24369	7.51807	16.92	1	0.982972	0.954517	0.944023	1.06096	0.985617	1.01383	0.989434	1.06201	1.0215	1.02169	0.29148
M1DFN5	Uncharacterized protein OS=Solanum tuberosum GN=PGSC0003DMG400037874 PE=4 SV=1 - [M1DFN5_SOLTU]	13.6522	8.01611	10.08	1	0.910165	1.08897	0.950392	0.956431	0.976489	1.11125	1.19434	0.986733	0.940706	1.05826	0.291587
Q3Y5A4	Cytosolic nucleoside diphosphate kinase OS=Solanum chacoense PE=2 SV=1 - [Q3Y5A4_SOLCH]	15.8014	5.65576	8.57	1	1.0876	1.05127	1.2945	0.906881	1.08506	0.98559	1.15882	0.737913	0.910448	0.948194	0.291877
O65836	P69F protein OS=Solanum lycopersicum GN=p69f PE=4 SV=1 - [O65836_SOLLC]	76.1394	6.75635	2.78	1	1.0211	1.01226	0.937948	0.859243	0.957639	0.918283	0.981679	1.17871	1.07041	1.03727	0.29194
K4BL84	Uncharacterized protein OS=Solanum lycopersicum GN=Solyc03g115820.2 PE=4 SV=1 - [K4BL84_SOLLC]	29.8278	7.89893	14.54	2	1.17661	1.01851	0.933332	0.972395	1.02521	0.885268	0.844814	1.0431	0.999599	0.943196	0.29234
M1ANP1	Uncharacterized protein OS=Solanum tuberosum GN=PGSC0003DMG400010334 PE=4 SV=1 - [M1ANP1_SOLTU]	18.2372	4.83057	16.07	1	1.14119	1.03345	0.889741	1.08304	1.03686	0.979258	0.913261	0.904007	1.05189	0.962104	0.292946
E1CFU1	Calcium dependent protein kinase OS=Solanum lycopersicum GN=LeCDPK2 PE=2 SV=1 - [E1CFU1_SOLLC]	24.292	6.02393	4.07	1	1.0003	1.00166	0.957871	0.980146	0.984994	0.95044	1.0105	1.06418	1.04596	1.01777	0.293141
M1C1X3	Uncharacterized protein OS=Solanum tuberosum GN=PGSC0003DMG400022504 PE=4 SV=1 - [M1C1X3_SOLTU]	22.8353	5.92236	9.76	2	1.0102	1.02394	1.02634	0.996662	1.01429	1.01803	1.04323	1.01738	1.02101	1.02491	0.293579
D2IJS0	Putative uncharacterized protein (Fragment) OS=Phrodus microphyllus PE=4 SV=1 - [D2IJS0_9SOLA]	90.1042	8.06006	3.75	3	1.0414	1.17412	0.968981	0.939726	1.03106	0.889705	0.966466	0.950496	1.0342	0.960218	0.294148
Q9XGA7	Starch branching enzyme II (Fragment) OS=Solanum tuberosum GN=SBE II PE=2 SV=1 - [Q9XGA7_SOLTU]	95.7583	4.91943	4.55	3	1.11051	0.987474	0.999934	1.02001	1.02948	1.00939	0.942127	1.00583	1.00872	0.991516	0.294591
Q5EFR5	Chloroplast oxygen-evolving protein 16 kDa subunit OS=Nicotiana benthamiana GN=psbQ PE=2 SV=1 - [Q5EFR5_NICBE]	24.1809	9.65674	7.89	2	1.00617	1.05667	0.86792	0.965215	0.973994	1.10159	0.925247	1.06697	1.05774	1.03789	0.294796
M1AYG3	Uncharacterized protein OS=Solanum tuberosum GN=PGSC0003DMG400012675 PE=3 SV=1 - [M1AYG3_SOLTU]	45.895	7.18115	9.16	1	1.01523	1.14665	0.927265	1.02657	1.02893	0.938141	0.946298	1.0193	0.977371	0.970278	0.295207
M1B168	Uncharacterized protein OS=Solanum tuberosum GN=PGSC0003DMG400013343 PE=3 SV=1 - [M1B168_SOLTU]	135.094	6.7124	4.65	4	1.10672	1.01055	0.958394	1.03856	1.02856	1.03474	0.938887	0.957503	1.0074	0.984631	0.295829
Q1MSH0	ALY protein OS=Nicotiana benthamiana GN=aly PE=2 SV=1 - [Q1MSH0_NICBE]	26.6935	10.0522	14.23	3	0.969673	0.999893	0.983682	1.0432	0.999111	1.02896	1.05214	1.00132	1.00521	1.02191	0.297487
O22373	Superoxide dismutase [Cu-Zn] OS=Capsicum annuum GN=SODCC PE=2 SV=1 - [SODC_CAPAN]	15.2694	5.38916	18.42	2	1.04672	1.00289	1.22205	0.970888	1.06064	1.03295	1.08859	0.937239	0.795114	0.963475	0.29847
M0ZI79	Uncharacterized protein OS=Solanum tuberosum GN=PGSC0003DMG400000486 PE=4 SV=1 - [M0ZI79_SOLTU]	26.4336	7.92822	7.76	2	1.01837	0.972237	1.14807	1.155	1.07342	1.01214	1.14917	0.933895	0.790126	0.971332	0.298797
K4CET6	Uncharacterized protein OS=Solanum lycopersicum GN=Solyc07g045290.2 PE=4 SV=1 - [K4CET6_SOLLC]	46.874	7.41553	4.76	2	0.984083	0.967778	0.929495	1.07973	0.990271	0.999339	0.99747	1.07569	1.06476	1.03431	0.298837
K4B9W8	Uncharacterized protein OS=Solanum lycopersicum GN=Solyc02g080980.2 PE=4 SV=1 - [K4B9W8_SOLLC]	48.221	7.72314	3.29	1	1.08457	1.06384	1.05261	0.99325	1.04857	1.1032	1.00785	0.963349	0.830064	0.976117	0.298901
M1AB44	Uncharacterized protein OS=Solanum tuberosum GN=PGSC0003DMG400007277 PE=3 SV=1 - [M1AB44_SOLTU]	21.6332	9.30518	14.07	3	0.936282	1.03839	0.937663	1.0223	0.983659	0.991814	0.991356	1.02372	1.09121	1.02453	0.299238
Q2V992	Mitochondrial processing peptidase-like OS=Solanum tuberosum PE=1 SV=1 - [Q2V992_SOLTU]	58.0695	6.16357	7.28	5	0.970582	0.990196	0.947913	0.998854	0.976886	0.986088	0.946751	1.04643	1.09721	1.01912	0.299315
K4BGU6	Uncharacterized protein OS=Solanum lycopersicum GN=Solyc03g058990.1 PE=3 SV=1 - [K4BGU6_SOLLC]	6.64264	9.80322	42.11	1	1.02581	1.05181	1.10882	1.09536	1.07045	1.11085	1.02512	0.998177	0.713152	0.961825	0.299656
M1BJW0	Uncharacterized protein OS=Solanum tuberosum GN=PGSC0003DMG400018227 PE=4 SV=1 - [M1BJW0_SOLTU]	149.844	7.25439	0.71	1	0.908132	0.87769	1.15173	0.942102	0.969913	1.01528	1.12996	0.969521	1.09982	1.05364	0.299863
M1BAI7	Uncharacterized protein OS=Solanum tuberosum GN=PGSC0003DMG401015792 PE=3 SV=1 - [M1BAI7_SOLTU]	34.1547	9.34912	6.71	2	1.05001	0.957617	1.14799	0.947374	1.02575	0.898218	1	0.954242	1.00371	0.964041	0.301161
Q8GV42	Hemoglobin OS=Solanum tuberosum PE=2 SV=1 - [Q8GV42_SOLTU]	17.1269	8.82178	11.18	1	1.04089	1.15566	0.839295	1.10357	1.03485	0.932509	0.939106	0.901978	1.01432	0.946977	0.301498
M1B530	Uridine kinase OS=Solanum tuberosum GN=PGSC0003DMG400014372 PE=3 SV=1 - [M1B530_SOLTU]	39.2798	8.22119	8.36	1	1.03919	1.10426	0.858455	1.16047	1.04059	0.893675	0.845688	0.963338	1.08161	0.946077	0.301755
P56333	Eukaryotic translation initiation factor 5A-1/2 OS=Solanum tuberosum GN=EIF5A1 PE=2 SV=1 - [IF5A1_SOLTU]	17.4207	5.98584	39.38	1	1.00183	0.895648	0.963021	1.04951	0.977502	1.09491	0.932216	1.07483	1.02814	1.03252	0.30209
Q33C00	DNA-directed RNA polymerase subunit alpha OS=Nicotiana tomentosiformis GN=rpoA PE=3 SV=1 - [RPOA_NICTO]	31.6864	6.45557	10.47	3	1.00142	0.945532	0.987302	0.956701	0.972739	1.10123	1.0204	0.988356	0.947337	1.01433	0.302649
M1BMA8	Uncharacterized protein OS=Solanum tuberosum GN=PGSC0003DMG400018784 PE=4 SV=1 - [M1BMA8_SOLTU]	41.7407	6.15088	13.1	5	1.03313	1.05568	1.07697	1.01183	1.0444	1.04657	1.06547	0.936036	0.971393	1.00487	0.303056
O78327	Transketolase 1 OS=Capsicum annuum PE=2 SV=1 - [O78327_CAPAN]	80.0556	6.62451	19.62	7	1.01856	1.02851	0.986654	1.03887	1.01815	1.03089	1.01312	0.981544	0.90436	0.982479	0.303152
M1BU81	Uncharacterized protein OS=Solanum tuberosum GN=PGSC0003DMG401020557 PE=4 SV=1 - [M1BU81_SOLTU]	17.5238	7.00537	6.49	1	1.08431	1.06352	0.919604	1.02854	1.02399	0.889518	0.987914	0.993818	1.0157	0.971739	0.303552
M1AZ95	Uncharacterized protein OS=Solanum tuberosum GN=PGSC0003DMG402012873 PE=4 SV=1 - [M1AZ95_SOLTU]	45.1236	7.6499	2.9	1	1.02649	0.891376	0.919637	0.902775	0.935069	0.873079	1.10025	0.942711	1.26926	1.04633	0.304249
M1CGF6	T-complex protein 1 subunit alpha OS=Solanum tuberosum GN=PGSC0003DMG400026026 PE=3 SV=1 - [M1CGF6_SOLTU]	59.1829	6.354	5.5	3	0.955433	0.984919	0.886805	1.02263	0.962446	1.00921	0.920373	1.05661	1.05766	1.01096	0.30463
K4B6N0	Uncharacterized protein OS=Solanum lycopersicum GN=Solyc02g063450.2 PE=4 SV=1 - [K4B6N0_SOLLC]	82.5847	6.93213	3.43	3	0.994793	0.89022	1.00486	0.994756	0.971159	0.970389	0.933557	1.12502	1.11213	1.03527	0.305486
M1A1S5	Uncharacterized protein OS=Solanum tuberosum GN=PGSC0003DMG400004980 PE=3 SV=1 - [M1A1S5_SOLTU]	18.3743	7.28369	27.38	4	1.00768	1.08198	1.01273	1.06056	1.04074	0.991196	0.882927	1.10279	0.95471	0.982906	0.307327
M1CNJ1	Uncharacterized protein OS=Solanum tuberosum GN=PGSC0003DMG400027739 PE=4 SV=1 - [M1CNJ1_SOLTU]	115.233	6.88818	15.88	9	0.979539	1.03054	0.98114	0.981325	0.993137	0.997992	1.02478	1.00817	1.00525	1.00905	0.307384
P93230	Glucose-1-phosphate adenylyltransferase OS=Solanum lycopersicum GN=agpL3 PE=2 SV=1 - [P93230_SOLLC]	37.1296	9.11475	19.05	3	1.02777	1.02001	1.00331	1.07807	1.03229	1.07893	0.883457	1.02339	0.913514	0.974823	0.307446
M0ZZ31	Glutamine synthetase OS=Solanum tuberosum GN=PGSC0003DMG400004355 PE=3 SV=1 - [M0ZZ31_SOLTU]	13.3596	6.17627	25	4	0.95731	1.03816	1.01544	1.06314	1.01851	1.04222	0.942014	1.0138	0.885419	0.970865	0.307479
M0ZT27	Uncharacterized protein OS=Solanum tuberosum GN=PGSC0003DMG401002888 PE=4 SV=1 - [M0ZT27_SOLTU]	110.963	6.58057	0.81	1	0.853627	1.02077	0.905968	1.09997	0.970084	1.06969	0.977565	1.03299	1.08167	1.04048	0.307659
M1AU18	Uncharacterized protein OS=Solanum tuberosum GN=PGSC0003DMG400011597 PE=4 SV=1 - [M1AU18_SOLTU]	36.0938	8.45557	14.06	4	0.957537	0.975637	0.942516	1.04564	0.980333	0.999648	1.01254	0.990564	1.03367	1.00911	0.308074
M1A7J1	Uncharacterized protein OS=Solanum tuberosum GN=PGSC0003DMG400006391 PE=3 SV=1 - [M1A7J1_SOLTU]	73.0438	7.00537	5.91	3	0.891991	0.969422	0.964027	1.07363	0.974768	0.968947	1.16529	1.03482	0.988284	1.03934	0.308485
Q2PYX5	Ubiquitin carrier-like protein OS=Solanum tuberosum GN=PGSC0003DMG400033039 PE=2 SV=1 - [Q2PYX5_SOLTU]	17.3235	5.57959	11.18	1	0.94108	0.960695	0.937922	0.980326	0.955005	0.886264	1.21289	0.954297	1.1449	1.04959	0.308659
C0LF68	Glutathione S-transferase (Fragment) OS=Capsicum annuum GN=GST PE=2 SV=1 - [C0LF68_CAPAN]	24.8629	5.5415	8.64	1	0.979951	0.936518	1.21868	1.03139	1.04163	0.873514	1.05417	0.881897	1.01163	0.955304	0.30925
M1AFN7	Uncharacterized protein OS=Solanum tuberosum GN=PGSC0003DMG400008445 PE=4 SV=1 - [M1AFN7_SOLTU]	25.5364	10.1694	10.92	2	0.99231	1.10119	0.805658	0.94016	0.959829	1.01102	0.980442	1.11375	1.04653	1.03793	0.30954
P33491	Auxin-binding protein T92 OS=Nicotiana tabacum GN=T92 PE=3 SV=1 - [ABP2_TOBAC]	317.632	5.10986	2.72	3	0.973176	0.951676	0.953133	1.07345	0.987859	1.02436	1.02019	1.03765	1.01102	1.02331	0.310035
M1C1X8	Uncharacterized protein OS=Solanum tuberosum GN=PGSC0003DMG400022508 PE=4 SV=1 - [M1C1X8_SOLTU]	24.3936	6.21436	5	1	0.852794	0.997544	1.17204	0.836378	0.964689	1.15346	1.20598	0.936046	1.00767	1.07579	0.311364
M0ZV40	Uncharacterized protein OS=Solanum tuberosum GN=PGSC0003DMG400003419 PE=3 SV=1 - [M0ZV40_SOLTU]	54.2085	5.09717	39.34	1	1.04907	1.11139	0.910048	1.03974	1.02756	0.968871	0.963408	1.03451	0.925351	0.973034	0.311453
K4CNI4	Uncharacterized protein OS=Solanum lycopersicum GN=Solyc08g078250.2 PE=4 SV=1 - [K4CNI4_SOLLC]	33.2367	6.53662	6.4	1	1.0052	0.916937	0.687741	1.07186	0.920437	0.800406	1.07098	1.1468	1.20521	1.05585	0.311814
P49317	Catalase isozyme 3 OS=Nicotiana plumbaginifolia GN=CAT3 PE=1 SV=1 - [CATA3_NICPL]	49.9088	7.06396	26.39	3	1.00748	0.986793	1.07502	1.01097	1.02007	1.00035	0.982389	1.0334	0.949933	0.99152	0.31196
M1C132	Uncharacterized protein OS=Solanum tuberosum GN=PGSC0003DMG400022308 PE=3 SV=1 - [M1C132_SOLTU]	39.8831	8.14795	7.14	2	0.928394	0.97671	0.931214	0.9564	0.948179	0.941521	1.16282	0.900423	1.08766	1.0231	0.31199
K4BPP3	Uncharacterized protein OS=Solanum lycopersicum GN=Solyc04g011900.2 PE=4 SV=1 - [K4BPP3_SOLLC]	35.5508	8.63135	10	3	1.01392	0.950465	0.964582	1.01196	0.985233	1.04077	1.12808	0.985048	0.968413	1.03058	0.312437
C9E259	Translation initiation factor eIF(Iso)4E (Fragment) OS=Solanum lycopersicum GN=eIF(iso)4E PE=4 SV=1 - [C9E259_SOLLC]	4.2862	9.59814	19.44	1	1.01639	1.08172	0.981525	1.07702	1.03916	1.10136	0.954578	0.984901	0.877908	0.979687	0.312527
K4BUX5	Uncharacterized protein OS=Solanum lycopersicum GN=Solyc04g078910.2 PE=4 SV=1 - [K4BUX5_SOLLC]	24.4864	6.22705	7.44	1	1.02566	0.95909	1.20972	0.976989	1.04286	0.898449	0.984993	0.938226	1.05141	0.96827	0.312685
M1D1L3	Uncharacterized protein OS=Solanum tuberosum GN=PGSC0003DMG400030869 PE=3 SV=1 - [M1D1L3_SOLTU]	17.4761	10.3599	8.97	1	1.01546	0.977571	0.753727	1.06038	0.951785	0.99421	0.958483	1.1509	1.0631	1.04167	0.313447
M1A6P9	Uncharacterized protein OS=Solanum tuberosum GN=PGSC0003DMG402006194 PE=4 SV=1 - [M1A6P9_SOLTU]	48.652	8.45557	4.97	2	0.938689	1.01025	1.13339	1.04678	1.03228	0.886824	1.03299	0.967673	1.01245	0.974982	0.313496
M1BFY0	Uncharacterized protein OS=Solanum tuberosum GN=PGSC0003DMG400017196 PE=4 SV=1 - [M1BFY0_SOLTU]	56.3045	6.72705	1.34	1	0.88694	1.0846	0.913128	1.02541	0.97752	1.03279	1.0662	1.03292	1.00548	1.03435	0.314422
M1A3D4	Peptidyl-prolyl cis-trans isomerase OS=Solanum tuberosum GN=PGSC0003DMG400005406 PE=3 SV=1 - [M1A3D4_SOLTU]	20.4833	8.11865	4.74	1	1.01055	1.02005	0.942533	0.979241	0.988094	1.0524	1.01176	1.07427	0.954563	1.02325	0.31449
Q84Y00	Superoxide dismutase (Fragment) OS=Solanum tuberosum PE=2 SV=1 - [Q84Y00_SOLTU]	21.3167	6.29053	32.09	1	1.32991	0.990355	0.831226	1.06932	1.05521	0.841997	0.874967	1.01582	0.973951	0.926682	0.315955
M1BWE6	Uncharacterized protein OS=Solanum tuberosum GN=PGSC0003DMG400021145 PE=4 SV=1 - [M1BWE6_SOLTU]	40.3008	8.1333	2.17	1	0.864976	0.986473	1.05262	0.988365	0.973109	0.972936	1.19693	0.967496	1.04743	1.0462	0.315995
K4CU67	Uncharacterized protein OS=Solanum lycopersicum GN=ADH3 PE=4 SV=1 - [K4CU67_SOLLC]	41.2611	8.04541	18.06	2	0.984027	1.00367	0.890368	0.965132	0.960798	0.898042	0.996931	1.06379	1.15788	1.02916	0.316396
K4CL08	Uncharacterized protein OS=Solanum lycopersicum GN=Solyc08g062190.2 PE=4 SV=1 - [K4CL08_SOLLC]	40.5198	6.90283	6.2	3	1.07143	0.918784	0.96484	1.15043	1.02637	0.878805	0.851428	1.05724	1.00432	0.947948	0.317256
C8YNG7	3-ketoacyl CoA thiolase 2 OS=Petunia hybrida PE=2 SV=1 - [C8YNG7_PETHY]	48.964	7.98682	20.3	7	1.02381	1.00721	1.07659	0.987528	1.02378	1.03336	1.01805	0.957257	0.971592	0.995065	0.318229
A9LRT7	Isopentenyl diphosphate isomerase OS=Solanum lycopersicum GN=IPI PE=2 SV=1 - [A9LRT7_SOLLC]	13.4098	5.52881	7.83	1	0.950248	0.939585	1.15042	1.12733	1.04189	0.896776	0.885335	0.989813	1.07992	0.96296	0.318649
M1CMR2	Uncharacterized protein OS=Solanum tuberosum GN=PGSC0003DMG401027531 PE=4 SV=1 - [M1CMR2_SOLTU]	50.2416	5.99854	1.76	1	0.951427	1.04559	1.17637	0.998282	1.04292	0.990339	1.05784	0.948714	0.923675	0.980143	0.318784
K4B1V0	Uncharacterized protein OS=Solanum lycopersicum GN=Solyc01g103750.2 PE=4 SV=1 - [K4B1V0_SOLLC]	26.0033	6.21436	4.17	1	0.976241	0.938446	0.979469	1.02379	0.979486	0.921982	1.10577	1.03665	1.04389	1.02707	0.318809
Q307X7	Ribosomal protein PETRP-like OS=Solanum tuberosum GN=PGSC0003DMG400015245 PE=2 SV=1 - [Q307X7_SOLTU]	19.8004	10.1108	26.01	1	0.986301	1.01542	0.844964	0.99526	0.960485	1.02641	0.920959	1.12632	1.01735	1.02276	0.318879
M0ZMS6	Triosephosphate isomerase OS=Solanum tuberosum GN=PGSC0003DMG400001595 PE=3 SV=1 - [M0ZMS6_SOLTU]	34.6466	7.28369	19.33	1	1.03618	1.17881	0.929917	0.997076	1.03549	1.01041	0.853166	1.01311	0.981341	0.964507	0.319011
M1B7S1	Uncharacterized protein OS=Solanum tuberosum GN=PGSC0003DMG400015115 PE=4 SV=1 - [M1B7S1_SOLTU]	50.8563	5.80811	5.96	1	1.01941	0.919943	1.03448	0.955366	0.982297	1.15877	1.1118	0.999267	0.925329	1.04879	0.320366
Q2XPW4	60S ribosomal protein L7A-like protein OS=Solanum tuberosum GN=PGSC0003DMG400022511 PE=2 SV=1 - [Q2XPW4_SOLTU]	41.497	10.0522	23.08	1	0.942537	1.10073	0.826516	0.968551	0.959582	1.05208	0.902433	1.10121	1.10082	1.03914	0.320838
M1CZC8	Uncharacterized protein OS=Solanum tuberosum GN=PGSC0003DMG400030370 PE=4 SV=1 - [M1CZC8_SOLTU]	57.0314	8.90967	10.63	5	1.01485	1.0043	1.19644	1.01914	1.05868	1.02092	1.09462	0.952789	0.892012	0.990085	0.321264
M1BB68	Uncharacterized protein OS=Solanum tuberosum GN=PGSC0003DMG400015992 PE=4 SV=1 - [M1BB68_SOLTU]	15.9843	10.0962	30.77	3	0.945418	1.0864	0.848121	0.977771	0.964428	1.02955	0.923941	1.09993	1.07679	1.03255	0.321313
M0ZRV9	Malic enzyme OS=Solanum tuberosum GN=PGSC0003DMG400002612 PE=3 SV=1 - [M0ZRV9_SOLTU]	59.8419	8.20654	7.96	1	1.14562	0.932183	1.10001	0.998817	1.04416	1.0839	0.882128	0.923141	1.00312	0.973071	0.321742
M1C6E4	Uncharacterized protein OS=Solanum tuberosum GN=PGSC0003DMG400023636 PE=4 SV=1 - [M1C6E4_SOLTU]	32.1079	5.12256	10.92	1	0.928507	0.983601	1.03143	0.968497	0.978009	0.975419	1.02821	0.96821	1.15099	1.03071	0.32214
Q53J18	Xanthine/uracil permease family protein OS=Solanum lycopersicum GN=LES1_20t00010 PE=4 SV=2 - [Q53J18_SOLLC]	144.363	7.34229	1.83	2	1.00388	0.991189	0.933539	1.00799	0.984149	0.954017	1.0518	0.997806	1.07258	1.01905	0.322252
M1CZC0	Uncharacterized protein OS=Solanum tuberosum GN=PGSC0003DMG400030365 PE=4 SV=1 - [M1CZC0_SOLTU]	42.7132	6.69775	12.92	2	0.965601	1.01138	0.883056	1.0424	0.975609	0.981391	0.944091	1.09401	1.12226	1.03544	0.322316
M1A483	T-complex protein 1 subunit delta OS=Solanum tuberosum GN=PGSC0003DMG400005665 PE=3 SV=1 - [M1A483_SOLTU]	57.9532	7.1665	16.14	7	0.998601	0.949654	1.032	0.978882	0.989786	0.948229	1.07764	1.00993	1.08509	1.03022	0.322389
M1AH70	Uncharacterized protein OS=Solanum tuberosum GN=PGSC0003DMG400008830 PE=4 SV=1 - [M1AH70_SOLTU]	32.45	8.80713	18.12	2	1.01549	0.982521	1.07743	1.01692	1.02309	0.997041	0.968103	1.04156	0.97373	0.995109	0.322401
M1ADD0	Uncharacterized protein OS=Solanum tuberosum GN=PGSC0003DMG400007872 PE=4 SV=1 - [M1ADD0_SOLTU]	110.349	4.95752	1.57	1	1.11255	1.23616	0.917743	0.911812	1.04456	0.938197	0.87523	0.971235	1.011	0.948915	0.322499
M1A0A3	Uncharacterized protein OS=Solanum tuberosum GN=PGSC0003DMG400004652 PE=3 SV=1 - [M1A0A3_SOLTU]	43.949	8.04541	9.23	3	1.04883	0.880341	1.02778	1.1924	1.03734	0.885006	0.942857	1.03729	0.967019	0.958044	0.322787
K7W5I7	60S ribosomal protein L36 OS=Solanum tuberosum GN=PGSC0003DMG400015795 PE=3 SV=1 - [K7W5I7_SOLTU]	61.2033	9.51025	5.72	3	0.912595	1.06908	0.896363	0.934092	0.953034	1.05471	0.859272	1.18948	1.05464	1.03953	0.323031
M1CRG6	Uncharacterized protein OS=Solanum tuberosum GN=PGSC0003DMG400028417 PE=3 SV=1 - [M1CRG6_SOLTU]	38.4937	6.94678	3.47	1	1.04998	0.971525	1.04045	0.975866	1.00945	1.06775	0.990027	1.02451	1.08301	1.04132	0.323139
Q5D8D3	Acyl-coenzyme A oxidase OS=Solanum lycopersicum GN=Acx1A PE=1 SV=1 - [Q5D8D3_SOLLC]	41.1272	8.98291	2.22	1	0.972527	1.10279	0.879075	0.944689	0.97477	1.05978	0.994204	1.08254	0.994884	1.03285	0.323158
M1CC22	Uncharacterized protein OS=Solanum tuberosum GN=PGSC0003DMG400024967 PE=3 SV=1 - [M1CC22_SOLTU]	36.3673	9.05615	6.93	1	0.955177	0.961725	1.0879	0.915451	0.980063	1.21801	1.07208	0.968087	0.96779	1.05649	0.32399
K4CQ45	Uncharacterized protein OS=Solanum lycopersicum GN=Solyc09g005550.2 PE=4 SV=1 - [K4CQ45_SOLLC]	59.5832	6.44287	2.27	1	1.107	0.980549	0.837873	0.909712	0.958784	1.21104	1.16408	1.06473	0.835051	1.06873	0.325112
K4AXS2	Glutamine synthetase OS=Solanum lycopersicum GN=Solyc01g080280.2 PE=3 SV=1 - [K4AXS2_SOLLC]	33.1447	7.76709	15.33	3	1.08565	1.06465	1.00354	1.03331	1.04679	1.06127	0.987945	1.04562	0.746585	0.960353	0.325308
K4D5U7	Uncharacterized protein OS=Solanum lycopersicum GN=Solyc11g011420.1 PE=4 SV=1 - [K4D5U7_SOLLC]	65.9846	5.51611	1.71	1	1.02066	0.968073	1.00662	0.996995	0.998088	1.01015	1.00739	0.998223	1.03602	1.01295	0.325398
M1CDM5	Uncharacterized protein OS=Solanum tuberosum GN=PGSC0003DMG400025361 PE=4 SV=1 - [M1CDM5_SOLTU]	114.432	7.15186	3.33	1	0.970861	1.05342	1.23601	0.942095	1.0506	0.925455	1.06684	0.932217	0.952781	0.969325	0.328058
M0ZZV7	Adenosylhomocysteinase OS=Solanum tuberosum GN=PGSC0003DMG400004572 PE=3 SV=1 - [M0ZZV7_SOLTU]	53.2111	6.1001	26.6	4	0.973074	1.08229	0.930178	1.04001	1.00639	0.949072	0.919219	0.917092	1.04621	0.957898	0.328065
G8Z292	Serine/threonine-protein phosphatase OS=Solanum lycopersicum PE=2 SV=1 - [G8Z292_SOLLC]	104.717	5.90967	2.55	2	0.960169	0.94978	1.07343	0.990333	0.993429	1.10668	1.12514	0.969827	0.983606	1.04631	0.328682
K4D3R4	Uncharacterized protein OS=Solanum lycopersicum GN=Solyc10g084800.1 PE=3 SV=1 - [K4D3R4_SOLLC]	37.7518	6.53662	6.51	2	1.02689	1.08934	0.921824	1.04218	1.02006	0.946232	0.973874	0.966257	1.02261	0.977243	0.329725
M1C800	Uncharacterized protein OS=Solanum tuberosum GN=PGSC0003DMG400024040 PE=4 SV=1 - [M1C800_SOLTU]	45.9844	5.31299	4.14	1	0.967572	1.01688	0.999041	0.968115	0.987902	1.06555	0.939665	1.02224	1.06732	1.02369	0.329915
Q41452	Flavonol synthase/flavanone 3-hydroxylase OS=Solanum tuberosum PE=2 SV=1 - [FLS_SOLTU]	191.092	6.07471	6.25	1	1.00548	1.02893	1.0634	1.01029	1.02703	0.995519	0.990373	0.99224	1.04859	1.00668	0.330406
M1C6I6	Uncharacterized protein OS=Solanum tuberosum GN=PGSC0003DMG400023667 PE=4 SV=1 - [M1C6I6_SOLTU]	18.6011	10.6528	22.56	1	0.957524	1.09516	0.870372	0.944207	0.966816	1.00203	0.941307	1.119	1.06214	1.03112	0.330524
M1ASK1	Uncharacterized protein OS=Solanum tuberosum GN=PGSC0003DMG402011260 PE=4 SV=1 - [M1ASK1_SOLTU]	19.8428	4.48779	11.36	2	0.985852	0.96977	1.12992	1.15399	1.05989	1.09488	1.09931	0.852263	0.78294	0.957349	0.330571
M1B5E2	Uncharacterized protein OS=Solanum tuberosum GN=PGSC0003DMG400014449 PE=3 SV=1 - [M1B5E2_SOLTU]	64.656	7.29834	1.88	1	1.20796	1.03789	0.847594	1.06746	1.04023	0.874807	0.940847	0.90882	1.06756	0.948008	0.331245
M1B6Y4	Uncharacterized protein OS=Solanum tuberosum GN=PGSC0003DMG400014854 PE=4 SV=1 - [M1B6Y4_SOLTU]	31.9269	8.90967	3.87	1	1.03606	1.0489	1.03688	1.06264	1.04612	1.02597	1.10806	0.946042	0.827188	0.976815	0.331261
Q84V57	Pectinesterase OS=Nicotiana benthamiana PE=2 SV=1 - [Q84V57_NICBE]	63.3656	9.23193	8.64	3	0.979614	0.969442	0.925526	0.952817	0.95685	0.884146	0.966339	1.11883	1.15188	1.0303	0.331901
K4C322	Uncharacterized protein OS=Solanum lycopersicum GN=Solyc06g005380.2 PE=4 SV=1 - [K4C322_SOLLC]	25.0871	7.76709	4.87	1	1.00091	0.844827	1.09669	0.838221	0.945163	0.940458	1.1438	0.886432	1.29108	1.06544	0.332194
M1BYF5	Small nuclear ribonucleoprotein-associated protein OS=Solanum tuberosum GN=PGSC0003DMG400021647 PE=3 SV=1 - [M1BYF5_SOLTU]	25.1917	11.1655	5.37	1	0.940582	1.09363	0.825405	1.02263	0.97056	1.06351	1.05115	0.986194	1.05086	1.03793	0.333135
M0ZY89	Uncharacterized protein OS=Solanum tuberosum GN=PGSC0003DMG400004124 PE=3 SV=1 - [M0ZY89_SOLTU]	13.5785	10.0962	45	5	0.986068	1.02473	0.91882	0.979819	0.977358	1.11652	0.917356	1.11662	0.993878	1.03609	0.333309
K4BJS2	Uncharacterized protein OS=Solanum lycopersicum GN=Solyc03g098590.2 PE=4 SV=1 - [K4BJS2_SOLLC]	20.7181	6.18896	6.88	1	0.883225	0.993095	1.03961	0.958331	0.968564	1.15664	1.26801	0.896401	0.960292	1.07033	0.333487
I7H9W4	Ribulose bisphosphate carboxylase large chain (Fragment) OS=Capsicum sp. KIBR KC636 GN=rbcL PE=3 SV=1 - [I7H9W4_9SOLA]	30.9243	8.07471	12.59	2	1.09523	0.925566	0.855147	0.918644	0.948646	0.947485	0.950325	1.02993	1.18648	1.02855	0.33379
K4CHH3	Uncharacterized protein OS=Solanum lycopersicum GN=Solyc07g064940.2 PE=4 SV=1 - [K4CHH3_SOLLC]	29.7808	6.0874	4.49	1	0.98872	1.20562	0.919558	1.03676	1.03766	0.935098	1.03204	0.932927	0.962918	0.965745	0.334026
M0ZJY9	Uncharacterized protein OS=Solanum tuberosum GN=PGSC0003DMG400000894 PE=3 SV=1 - [M0ZJY9_SOLTU]	45.8054	7.82568	10.95	1	0.949582	1.09725	1.20331	0.880143	1.03257	0.959053	1.06221	0.925305	0.803566	0.937532	0.335933
P86005	Alpha-amylase (Fragments) OS=Capsicum annuum PE=1 SV=1 - [AMY_CAPAN]	167.401	7.41553	7.58	3	0.978082	0.945377	1.21832	1.07592	1.05443	1.00539	1.09336	0.938076	0.840624	0.969362	0.33632
K4CWG8	Inosine triphosphate pyrophosphatase OS=Solanum lycopersicum GN=Solyc09g091420.2 PE=3 SV=1 - [K4CWG8_SOLLC]	22.9208	7.02002	7.69	1	0.986206	0.993098	1.02307	1.09231	1.02367	0.87209	1.01437	1.01035	1.0165	0.978328	0.336611
Q5Y7Z8	Cysteine proteinase inhibitor OS=Petunia hybrida GN=CPI1 PE=2 SV=1 - [Q5Y7Z8_PETHY]	28.3364	6.18896	13.89	2	1.07003	1.05762	1.06048	0.983494	1.04291	1.09959	0.98637	0.991225	0.889992	0.991794	0.337037
K4BZB7	Uncharacterized protein OS=Solanum lycopersicum GN=Solyc05g018630.1 PE=4 SV=1 - [K4BZB7_SOLLC]	7.66358	4.51318	19.44	1	1.09211	1.03205	1.09261	0.998711	1.05387	1.12525	1.01832	0.955365	0.804182	0.97578	0.337598
K4CDV2	Uncharacterized protein OS=Solanum lycopersicum GN=Solyc07g040750.1 PE=3 SV=1 - [K4CDV2_SOLLC]	39.6561	5.31299	17.85	1	0.85588	0.902269	0.816886	1.18667	0.940425	1.05773	0.922563	1.08814	1.0925	1.04023	0.339514
M1C4F3	Uncharacterized protein OS=Solanum tuberosum GN=PGSC0003DMG400023144 PE=4 SV=1 - [M1C4F3_SOLTU]	24.5711	8.52881	3.91	1	0.887809	0.966568	0.991136	1.02818	0.968424	0.950459	1.14498	0.919676	1.15446	1.04239	0.340387
M1A1Z3	Uncharacterized protein OS=Solanum tuberosum GN=PGSC0003DMG400005021 PE=3 SV=1 - [M1A1Z3_SOLTU]	42.5574	7.38623	2.54	1	0.974447	1.0172	0.994103	0.979492	0.99131	1.08853	0.972271	1.0589	0.979164	1.02472	0.340463
I7JS99	Ran GTPase activating protein 2 OS=Solanum gourlayi GN=RanGAP2 PE=4 SV=1 - [I7JS99_9SOLN]	19.638	4.67822	10	1	0.953877	0.998686	1.11106	1.10664	1.04257	1.06026	1.04521	0.940886	0.886356	0.98318	0.3409
Q6UAY5	Alpha-galactosidase (Fragment) OS=Petunia hybrida PE=2 SV=1 - [Q6UAY5_PETHY]	31.3058	5.04639	23.16	6	1.112	1.04003	1.01355	0.947615	1.0283	0.955576	0.903394	1.04593	1.0159	0.980199	0.341204
M1ASA5	Uncharacterized protein OS=Solanum tuberosum GN=PGSC0003DMG401011206 PE=4 SV=1 - [M1ASA5_SOLTU]	51.5132	6.87354	5.29	2	1.0769	1.00559	0.950736	1.12505	1.03957	1.00458	0.780004	1.04261	1.02592	0.963278	0.341212
K4BJJ6	Uncharacterized protein OS=Solanum lycopersicum GN=Solyc03g097790.2 PE=4 SV=1 - [K4BJJ6_SOLLC]	34.8417	5.99854	8.25	1	1.17452	1.11588	1.00739	0.990248	1.07201	1.12571	1.05871	0.958404	0.755655	0.97462	0.341371
K4CEV7	Uncharacterized protein OS=Solanum lycopersicum GN=Solyc07g045510.2 PE=4 SV=1 - [K4CEV7_SOLLC]	111.632	6.91748	0.7	1	0.979728	1.04431	0.890414	0.987801	0.975563	1.08556	1.00536	1.14034	0.915681	1.03674	0.341378
A5H0M3	Profilin (Fragment) OS=Nicotiana benthamiana PE=2 SV=1 - [A5H0M3_NICBE]	11.1907	4.88135	19.81	2	0.97335	0.975577	1.05991	0.95573	0.991141	1.06601	0.999479	0.975124	1.05654	1.02429	0.34155
P31212	Threonine dehydratase biosynthetic (Fragment) OS=Solanum tuberosum GN=TD PE=2 SV=1 - [THD1_SOLTU]	243.772	6.39209	9.73	11	1.0226	1.0043	1.01971	1.02473	1.01783	1.02222	1.03473	0.974264	0.945662	0.994219	0.341596
B5LAS6	Putative acetyl co-enzyme A carboxylase carboxyltransferase alpha subunit OS=Capsicum annuum PE=2 SV=1 - [B5LAS6_CAPAN]	71.3673	8.5874	4.24	3	1.01033	1.00401	1.03013	0.943737	0.997053	1.104	1.06493	1.02184	0.953982	1.03619	0.341996
M1BZD6	Uncharacterized protein OS=Solanum tuberosum GN=PGSC0003DMG400021910 PE=4 SV=1 - [M1BZD6_SOLTU]	30.0045	8.45557	4.76	1	0.985398	0.938512	1.07421	1.1807	1.04471	0.957638	1.07788	0.860696	0.994189	0.972601	0.342469
M0ZTX4	Uncharacterized protein OS=Solanum tuberosum GN=PGSC0003DMG400003102 PE=4 SV=1 - [M0ZTX4_SOLTU]	26.8459	5.30029	9.27	2	0.977602	1.00128	1.12035	1.05606	1.03882	0.982349	1.0677	0.983878	0.955619	0.997386	0.342742
K4CBZ9	Uncharacterized protein OS=Solanum lycopersicum GN=Solyc07g008800.2 PE=3 SV=1 - [K4CBZ9_SOLLC]	10.4217	8.39697	21.65	2	0.981487	1.11297	0.991421	0.999154	1.02126	1.05071	1.0012	0.908828	0.943322	0.976014	0.34287
K4D3F1	Uncharacterized protein OS=Solanum lycopersicum GN=Solyc10g083640.1 PE=4 SV=1 - [K4D3F1_SOLLC]	40.3196	9.34912	6.57	2	0.907902	0.969728	1.12621	0.924326	0.982043	0.908067	1.18754	1.04809	1.10178	1.06137	0.34315
M1C713	Uncharacterized protein OS=Solanum tuberosum GN=PGSC0003DMG400023767 PE=3 SV=1 - [M1C713_SOLTU]	31.8716	7.56201	2.38	1	1.03359	1.06555	0.929291	1.08792	1.02909	1.05289	0.94033	1.00929	0.923022	0.981385	0.343692
K4AXX7	Protein translocase subunit SecA OS=Solanum lycopersicum GN=Solyc01g080840.2 PE=3 SV=1 - [K4AXX7_SOLLC]	114.566	7.02002	4.52	4	0.977961	0.964869	1.16331	1.08437	1.04763	0.989987	1.11499	0.901457	0.901137	0.976892	0.344943
M1BCJ0	Acyl-[acyl-carrier-protein] desaturase OS=Solanum tuberosum GN=PGSC0003DMG400016331 PE=3 SV=1 - [M1BCJ0_SOLTU]	45.1148	6.26514	6.3	1	0.902963	0.94053	1.21305	0.804602	0.965287	1.06316	1.14569	1.07276	0.981699	1.06583	0.34536
P29059	Endochitinase 3 OS=Nicotiana tabacum GN=CHN14 PE=3 SV=1 - [CHI3_TOBAC]	36.1972	8.33838	11.98	2	0.918969	0.943271	0.918179	1.02623	0.951662	0.882935	1.04035	0.985499	1.30402	1.0532	0.346009
B6EWX3	UDP-glucose:glucosyltransferase OS=Lycium barbarum GN=UGT73A10 PE=2 SV=1 - [B6EWX3_LYCBA]	33.3286	5.14795	3.7	1	0.957664	1.10007	1.04352	1.05985	1.04028	0.957703	1.09058	1.0186	0.837416	0.976074	0.34656
K4BL04	Uncharacterized protein OS=Solanum lycopersicum GN=Solyc03g115020.2 PE=4 SV=1 - [K4BL04_SOLLC]	18.514	9.33447	5.06	1	0.946172	1.17236	0.90211	1.20379	1.05611	1.08693	0.93976	0.93451	0.896959	0.964541	0.347572
K4CRK7	Uncharacterized protein OS=Solanum lycopersicum GN=Solyc09g011810.2 PE=3 SV=1 - [K4CRK7_SOLLC]	44.0011	5.40186	31.76	5	1.00755	0.954516	1.02946	1.00651	0.999509	1.05731	0.984952	1.02156	1.02263	1.02161	0.348015
K4B7E5	Uncharacterized protein OS=Solanum lycopersicum GN=Solyc02g068130.2 PE=4 SV=1 - [K4B7E5_SOLLC]	22.8042	5.94775	3.92	1	0.970639	1.0052	0.921751	1.00223	0.974954	0.907363	1.01599	1.06325	1.12383	1.02761	0.348455
M1D0G6	Uncharacterized protein OS=Solanum tuberosum GN=PGSC0003DMG400030600 PE=4 SV=1 - [M1D0G6_SOLTU]	33.5805	5.87158	4.21	1	1.07852	0.957802	1.20631	0.965402	1.05201	1.07655	0.963408	1.00917	0.853063	0.975549	0.348602
Q5EKT7	Cytochrome P450 (Fragment) OS=Datura metel PE=3 SV=1 - [Q5EKT7_DATME]	12.9928	8.45557	6.19	1	0.853551	0.946093	1.11257	0.96963	0.970461	1.0359	1.21736	0.892552	1.08619	1.058	0.34922
Q03684	Luminal-binding protein 4 OS=Nicotiana tabacum GN=BIP4 PE=1 SV=1 - [BIP4_TOBAC]	73.477	5.18604	18.89	1	1.00735	0.966832	0.98098	0.966241	0.98035	1.01133	1.00289	0.948391	1.13867	1.02532	0.349563
K4D2L3	Uncharacterized protein OS=Solanum lycopersicum GN=Solyc10g079720.1 PE=3 SV=1 - [K4D2L3_SOLLC]	50.649	6.68311	3.84	2	0.997898	1.01167	1.22553	1.01796	1.06327	1.01719	1.13004	0.883176	0.90304	0.983362	0.349664
M1A694	Uncharacterized protein OS=Solanum tuberosum GN=PGSC0003DMG400006088 PE=4 SV=1 - [M1A694_SOLTU]	30.0675	6.44287	6.39	2	0.989104	0.996592	0.876918	0.949112	0.952932	0.886847	0.944688	1.12933	1.15589	1.02919	0.350474
M1CSC4	Uncharacterized protein OS=Solanum tuberosum GN=PGSC0003DMG400028599 PE=4 SV=1 - [M1CSC4_SOLTU]	33.9774	5.90967	4.95	1	1.08905	0.9576	0.889511	0.917346	0.963377	0.97884	1.22143	0.906084	1.08099	1.04684	0.351021
M1CKX2	Uncharacterized protein OS=Solanum tuberosum GN=PGSC0003DMG400027090 PE=4 SV=1 - [M1CKX2_SOLTU]	56.6541	5.8335	3.62	2	0.895341	0.924608	1.04	0.957677	0.954406	1.00076	1.3624	0.950711	0.950159	1.06601	0.351273
K4B257	Uncharacterized protein OS=Solanum lycopersicum GN=Solyc01g104850.2 PE=4 SV=1 - [K4B257_SOLLC]	54.6221	6.3667	4.81	1	0.860366	0.846701	1.21646	0.86183	0.946341	0.879586	1.23706	1.00548	1.14736	1.06737	0.351368
M1AVB2	Uncharacterized protein OS=Solanum tuberosum GN=PGSC0003DMG400011948 PE=3 SV=1 - [M1AVB2_SOLTU]	32.9013	5.46533	7.36	2	0.919957	1.02761	0.823649	1.10462	0.968957	1.09407	1.08647	1.03446	0.950048	1.04126	0.351845
M1C504	Proteasome subunit beta type OS=Solanum tuberosum GN=PGSC0003DMG400023337 PE=3 SV=1 - [M1C504_SOLTU]	29.3907	7.56201	15.81	4	1.03019	1.001	1.00365	0.993575	1.0071	1.03546	1.04894	1.00974	0.99436	1.02212	0.351952
K4B071	Uncharacterized protein OS=Solanum lycopersicum GN=Solyc01g096830.2 PE=3 SV=1 - [K4B071_SOLLC]	51.7228	9.0708	1.75	1	1.05252	0.828067	0.863036	1.01644	0.940015	0.803494	1.10156	1.0577	1.22348	1.04656	0.353338
M1C2T9	Uncharacterized protein OS=Solanum tuberosum GN=PGSC0003DMG402022737 PE=4 SV=1 - [M1C2T9_SOLTU]	33.7061	6.56592	27.33	6	1.00002	1.06441	0.897795	1.12272	1.02124	0.981485	0.914786	0.962268	1.00815	0.966671	0.353946
B2ZFD7	AOC OS=Petunia hybrida PE=2 SV=1 - [B2ZFD7_PETHY]	26.0454	8.96826	18.33	4	1.06011	1.02775	0.982436	1.04766	1.02949	0.982614	0.964123	1.03941	1.03133	1.00437	0.354933
K7WNY2	Glyceraldehyde 3-phosphate dehydrogenase OS=Solanum tuberosum GN=PGSC0003DMG400015253 PE=2 SV=1 - [K7WNY2_SOLTU]	36.7011	7.51807	45.1	1	1.11698	1.09756	1.05487	0.900686	1.04252	0.841536	0.952289	0.999222	1.09095	0.970999	0.355126
K4CXG4	Uncharacterized protein OS=Solanum lycopersicum GN=Solyc10g006330.2 PE=4 SV=1 - [K4CXG4_SOLLC]	97.3541	5.10986	2.15	2	1.00335	1.12456	0.91869	1.09707	1.03592	1.06366	0.91346	1.0232	0.89144	0.972939	0.355173
M1A9L0	Uncharacterized protein OS=Solanum tuberosum GN=PGSC0003DMG400006933 PE=3 SV=1 - [M1A9L0_SOLTU]	26.7916	4.18311	8.9	2	0.990193	0.97449	0.950885	0.999598	0.978792	1.00461	0.995347	1.09084	0.953549	1.01109	0.355191
K4C7I6	Uncharacterized protein OS=Solanum lycopersicum GN=Solyc06g065570.2 PE=4 SV=1 - [K4C7I6_SOLLC]	18.5526	8.80713	12.12	2	0.951706	0.988592	0.900626	1.0748	0.97893	1.02806	0.99096	1.01253	1.04719	1.01969	0.356015
M1CZD3	Uncharacterized protein OS=Solanum tuberosum GN=PGSC0003DMG400030374 PE=4 SV=1 - [M1CZD3_SOLTU]	38.6098	8.83643	7.05	2	0.983784	1.02788	1.02158	0.941506	0.993687	1.10347	1.09659	0.946078	1.00461	1.03769	0.356257
M1A9C1	Uncharacterized protein OS=Solanum tuberosum GN=PGSC0003DMG400006869 PE=3 SV=1 - [M1A9C1_SOLTU]	26.4983	9.5835	7.53	1	0.950037	0.969326	0.901459	1.0942	0.978755	1.03296	0.979904	1.03443	1.05158	1.02472	0.356285
M1AQK4	Uncharacterized protein OS=Solanum tuberosum GN=PGSC0003DMG400010809 PE=4 SV=1 - [M1AQK4_SOLTU]	20.8958	9.0415	6.12	1	1.10707	1.12724	1.00462	0.90381	1.03568	0.94385	0.947739	1.09522	0.882123	0.967232	0.357157
P49098	Cytochrome b5 OS=Nicotiana tabacum PE=2 SV=1 - [CYB5_TOBAC]	14.9695	5.10986	25	2	1.04926	1.09068	1.00922	1.052	1.05029	1.08259	1.0761	0.944496	0.857556	0.990185	0.357601
Q948Z3	Putative peroxidase OS=Solanum tuberosum GN=prx2 PE=2 SV=1 - [Q948Z3_SOLTU]	19.0304	6.3667	16.67	1	1.05099	0.916573	1.02161	0.90196	0.972784	0.928401	0.99484	1.0773	1.113	1.02838	0.357854
P13868	Calmodulin-1 OS=Solanum tuberosum GN=PCM1 PE=1 SV=2 - [CALM1_SOLTU]	16.893	4.27197	29.53	2	0.935684	1.06562	0.939117	1.18345	1.03097	1.01063	0.959918	0.948921	0.945867	0.966334	0.35915
K4D3F8	Pyruvate kinase OS=Solanum lycopersicum GN=Solyc10g083720.1 PE=3 SV=1 - [K4D3F8_SOLLC]	57.287	7.15186	19.17	3	1.02299	0.992756	0.852825	1.00729	0.968966	0.985314	0.935772	1.05958	1.1179	1.02464	0.359559
M1CYJ7	Uncharacterized protein OS=Solanum tuberosum GN=PGSC0003DMG400030158 PE=3 SV=1 - [M1CYJ7_SOLTU]	50.0674	7.45947	7.91	2	0.954794	1.00612	0.872098	1.04941	0.970607	1.11205	0.892121	1.08417	1.04146	1.03245	0.359657
Q8L6B8	Aspartate carbamoyltransferase OS=Solanum tuberosum GN=pyrB PE=2 SV=1 - [Q8L6B8_SOLTU]	28.7708	5.71924	3.89	1	1.0039	1.05769	0.927498	1.05729	1.0116	0.950484	0.953884	0.996765	1.00645	0.976896	0.361373
P93563	Guanine nucleotide-binding protein subunit beta OS=Solanum tuberosum GN=GB1 PE=2 SV=1 - [GBB_SOLTU]	334.116	7.02002	11.62	23	1.04742	1.03243	0.983531	1.03726	1.02516	1.0652	0.948482	1.02256	0.903622	0.984967	0.362045
K4B7D7	Uncharacterized protein OS=Solanum lycopersicum GN=Solyc02g068050.2 PE=4 SV=1 - [K4B7D7_SOLLC]	40.9626	6.07471	4.05	1	0.937244	1.11982	1.1328	0.957442	1.03683	1.00869	0.979792	0.949274	0.984725	0.98062	0.362134
F1B283	Cinnamate-4-hydroxylase 2 OS=Petunia hybrida GN=C4H2 PE=2 SV=1 - [F1B283_PETHY]	51.2662	9.33447	11.01	1	0.855433	1.01962	0.958428	1.009	0.960621	0.867619	1.00861	1.11049	1.1495	1.03405	0.363146
K4D597	Uncharacterized protein OS=Solanum lycopersicum GN=Solyc11g008370.1 PE=4 SV=1 - [K4D597_SOLLC]	19.5669	8.32373	7.1	1	0.984875	1.12828	0.938581	1.04798	1.02493	0.968805	0.918485	1.04309	0.975755	0.976533	0.363233
H2BJQ0	Putative steroid 5beta-reductase OS=Solanum tuberosum PE=2 SV=1 - [H2BJQ0_SOLTU]	43.6219	6.04932	4.13	1	1.06207	1.09114	1.06546	0.937793	1.03912	1.11203	0.962655	0.953976	0.904462	0.98328	0.363372
P30173	Actin-101 OS=Solanum tuberosum GN=AC101 PE=3 SV=1 - [ACT13_SOLTU]	41.6169	5.40186	38.2	2	0.969369	0.984326	1.0251	0.88333	0.965531	0.956804	1.03252	0.965941	1.06101	1.00407	0.364113
K4CV19	Uncharacterized protein OS=Solanum lycopersicum GN=Solyc09g074420.2 PE=4 SV=1 - [K4CV19_SOLLC]	67.5533	6.06201	3.54	1	0.832945	0.831048	1.1932	0.981364	0.95964	1.0351	1.34271	0.972142	0.970516	1.08012	0.366103
M1C5P9	Uncharacterized protein OS=Solanum tuberosum GN=PGSC0003DMG400023478 PE=4 SV=1 - [M1C5P9_SOLTU]	40.0698	6.26514	1.94	1	0.986532	1.04055	1.00182	0.935083	0.990995	1.09871	1.02113	0.952326	1.03837	1.02763	0.366124
M1C6B8	Glutamine synthetase OS=Solanum tuberosum GN=PGSC0003DMG400023620 PE=3 SV=1 - [M1C6B8_SOLTU]	39.1845	5.73193	11.52	2	0.92063	1.08543	0.89536	0.973088	0.968628	1.08432	1.04532	0.96264	0.982587	1.01872	0.366355
M1CN04	Glutamate dehydrogenase OS=Solanum tuberosum GN=PGSC0003DMG400027589 PE=3 SV=1 - [M1CN04_SOLTU]	44.6597	6.94678	12.65	3	1.02815	1.02455	0.822241	0.992327	0.966818	0.96921	0.963149	1.05715	1.11995	1.02737	0.366362
M0ZS78	Pyruvate kinase OS=Solanum tuberosum GN=PGSC0003DMG400002690 PE=3 SV=1 - [M0ZS78_SOLTU]	54.1715	7.44482	15.03	1	0.923952	0.860708	1.08606	0.983191	0.963478	0.915612	1.23006	0.936258	1.1289	1.05271	0.366448
K4AT23	Uncharacterized protein OS=Solanum lycopersicum GN=Solyc01g008250.2 PE=4 SV=1 - [K4AT23_SOLLC]	19.9873	8.88037	6.11	1	0.854763	1.19502	1.09217	1.05137	1.04833	0.997029	1.0305	0.910172	0.94503	0.970682	0.367673
K4DA57	Uncharacterized protein OS=Solanum lycopersicum GN=Solyc11g069000.1 PE=3 SV=1 - [K4DA57_SOLLC]	56.9307	5.97314	8.75	4	0.926009	0.998192	1.04184	0.934289	0.975083	0.916312	1.01671	1.04874	1.11325	1.02375	0.367867
M0ZXX7	Uncharacterized protein OS=Solanum tuberosum GN=PGSC0003DMG400004052 PE=4 SV=1 - [M0ZXX7_SOLTU]	57.8229	5.08447	7.87	2	0.918055	1.00849	0.898483	1.09687	0.980473	0.989149	1.00502	1.04664	1.0837	1.03113	0.368009
M0ZVL8	Uncharacterized protein OS=Solanum tuberosum GN=PGSC0003DMG400003544 PE=4 SV=1 - [M0ZVL8_SOLTU]	70.3191	8.86572	1.71	1	0.982982	0.999708	0.933765	0.9826	0.974764	0.956876	0.999753	0.980541	1.16506	1.02556	0.369062
M0ZMM8	Uncharacterized protein OS=Solanum tuberosum GN=PGSC0003DMG400001560 PE=4 SV=1 - [M0ZMM8_SOLTU]	25.5439	5.85889	5.29	1	1.16929	0.985029	1.17831	0.870018	1.05066	0.878463	1.10608	0.923009	0.941816	0.962342	0.369227
M1BAK9	Uncharacterized protein OS=Solanum tuberosum GN=PGSC0003DMG400015808 PE=3 SV=1 - [M1BAK9_SOLTU]	47.8788	7.98682	11.84	1	1.05613	1.07597	1.32378	0.886786	1.08567	1.11092	1.12583	0.845753	0.7576	0.960027	0.369764
M1AFV4	Uncharacterized protein OS=Solanum tuberosum GN=PGSC0003DMG400008496 PE=4 SV=1 - [M1AFV4_SOLTU]	33.7512	6.68311	5.44	1	0.989317	0.963701	1.22844	0.981994	1.04086	0.881585	1.03553	0.968369	0.99759	0.970769	0.372078
M1AUM5	Uncharacterized protein OS=Solanum tuberosum GN=PGSC0003DMG400011754 PE=3 SV=1 - [M1AUM5_SOLTU]	49.8665	7.35693	4.84	2	1.04156	1.01706	0.971371	0.98156	1.00289	0.993265	0.97626	1.02143	0.90424	0.973798	0.372243
G3K2M4	Methionine sulfoxide reductase A4 OS=Solanum lycopersicum GN=MSRA4 PE=3 SV=1 - [G3K2M4_SOLLC]	28.9104	8.39697	19.84	4	1.02049	1.12649	0.916067	1.01848	1.02038	0.976265	0.906013	1.05727	0.931611	0.96779	0.372246
M1B0H5	Uncharacterized protein OS=Solanum tuberosum GN=PGSC0003DMG400013199 PE=4 SV=1 - [M1B0H5_SOLTU]	31.962	8.07471	6.19	1	0.972468	0.905265	1.10736	0.907282	0.973093	0.921582	1.11169	1.01704	1.08822	1.03463	0.372448
K4BH28	Uncharacterized protein OS=Solanum lycopersicum GN=Solyc03g062790.2 PE=4 SV=1 - [K4BH28_SOLLC]	32.6	7.6499	10.51	3	1.04044	1.01127	0.947604	1.05308	1.0131	0.97566	0.894697	1.06288	0.956043	0.972319	0.373708
K4BK27	Uncharacterized protein OS=Solanum lycopersicum GN=Solyc03g111640.2 PE=4 SV=1 - [K4BK27_SOLLC]	75.1051	5.10986	4.38	2	0.998498	1.08078	0.898561	1.10589	1.02093	0.968576	0.9416	1.01202	0.962601	0.971198	0.374161
Q9ZR69	Acetyl-CoA synthetase OS=Solanum tuberosum GN=acs PE=2 SV=1 - [Q9ZR69_SOLTU]	70.5951	6.37939	7.29	4	1.023	0.92509	1.00214	0.938303	0.972132	0.982201	1.14693	0.97816	0.972127	1.01986	0.374304
Q2VCK0	GDP dissociation inhibitor 1-like OS=Solanum tuberosum PE=2 SV=1 - [Q2VCK0_SOLTU]	49.6581	5.88428	19.14	4	1.02425	1.05463	0.97572	0.999971	1.01364	1.00624	0.911195	1.03152	0.985384	0.983585	0.374349
M1B7F4	Uncharacterized protein OS=Solanum tuberosum GN=PGSC0003DMG400015006 PE=4 SV=1 - [M1B7F4_SOLTU]	21.8206	7.50342	4.12	1	0.96293	1.10696	0.924694	1.15356	1.03704	0.814234	1.08036	0.85345	1.06033	0.952093	0.374691
M0ZNU4	Uncharacterized protein OS=Solanum tuberosum GN=PGSC0003DMG400001863 PE=4 SV=1 - [M0ZNU4_SOLTU]	126.775	7.60596	0.87	1	1.08638	1.01757	0.94597	1.05836	1.02707	1.06755	0.987072	0.941006	0.952279	0.986976	0.374713
K4BEL9	Uncharacterized protein OS=Solanum lycopersicum GN=Solyc03g007980.1 PE=4 SV=1 - [K4BEL9_SOLLC]	36.266	7.06396	3.32	1	0.916531	0.870499	1.00222	1.04348	0.958182	0.847965	1.06046	1.20861	1.04523	1.04057	0.374967
M1AD62	Uncharacterized protein OS=Solanum tuberosum GN=PGSC0003DMG400007831 PE=3 SV=1 - [M1AD62_SOLTU]	54.7263	6.17627	21.06	10	1.01109	1.04999	0.958234	1.02028	1.0099	0.990914	0.954885	1.01979	0.983832	0.987356	0.374993
K4B1X9	Uncharacterized protein OS=Solanum lycopersicum GN=Solyc01g104040.2 PE=4 SV=1 - [K4B1X9_SOLLC]	185.672	5.99854	1.52	2	0.969311	0.900226	1.10365	0.91024	0.970857	0.984643	1.23364	0.919773	1.06427	1.05058	0.375047
M1BT68	Uncharacterized protein OS=Solanum tuberosum GN=PGSC0003DMG400020305 PE=4 SV=1 - [M1BT68_SOLTU]	25.8692	6.81494	21.83	2	0.998585	1.07176	0.909842	0.928007	0.977048	1.20217	0.944384	1.04686	0.978908	1.04308	0.375226
M0ZQJ2	Uncharacterized protein OS=Solanum tuberosum GN=PGSC0003DMG400002290 PE=4 SV=1 - [M0ZQJ2_SOLTU]	42.92	9.29053	7.41	3	1.04168	1.00856	0.964261	1.09646	1.02774	0.976956	0.908262	1.06641	0.995084	0.986679	0.375269
Q41246	14-3-3-like protein OS=Nicotiana tabacum PE=2 SV=1 - [1433_TOBAC]	28.6492	5.021	22.31	1	0.956229	1.0144	0.82735	1.03902	0.95925	0.994817	0.899547	1.04648	1.19569	1.03413	0.375681
M1B5I2	Uncharacterized protein OS=Solanum tuberosum GN=PGSC0003DMG402014476 PE=3 SV=1 - [M1B5I2_SOLTU]	102.14	6.30322	26.33	4	0.999316	1.02235	0.993909	1.10839	1.03099	1.05343	1.0294	0.963983	0.925765	0.993145	0.376061
M0ZV96	Uncharacterized protein OS=Solanum tuberosum GN=PGSC0003DMG400003465 PE=4 SV=1 - [M0ZV96_SOLTU]	49.5013	5.92236	5.41	1	1.06447	0.930357	1.30707	0.938478	1.06009	0.969719	1.09343	0.946312	0.83055	0.960003	0.376295
K4DDB1	Uncharacterized protein OS=Solanum lycopersicum GN=Solyc12g017830.1 PE=4 SV=1 - [K4DDB1_SOLLC]	196.172	5.45264	1.58	3	1.00423	1.19943	1.02373	0.96364	1.04775	0.751959	1.00673	0.973508	1.1072	0.959849	0.376743
M1BN83	Uncharacterized protein OS=Solanum tuberosum GN=PGSC0003DMG400019081 PE=3 SV=1 - [M1BN83_SOLTU]	9.81419	8.67529	9.64	1	1.09933	1.07504	0.980658	0.938875	1.02348	0.96272	0.960406	0.917084	1.06487	0.976269	0.376759
K7WCI9	Cis-prenyltransferase 3 OS=Solanum lycopersicum GN=CPT3 PE=3 SV=1 - [K7WCI9_SOLLC]	78.2308	7.38623	4.54	3	1.0144	0.95643	1.04029	1.11602	1.03178	0.948934	1.08618	0.945447	0.967028	0.986898	0.376878
M1CJ93	Uncharacterized protein OS=Solanum tuberosum GN=PGSC0003DMG400026667 PE=4 SV=1 - [M1CJ93_SOLTU]	21.752	9.0708	4.26	1	1.05144	1.03716	0.905248	1.1581	1.03799	1.07017	0.888165	1.03247	0.895049	0.971464	0.377748
M1BEQ3	Uncharacterized protein OS=Solanum tuberosum GN=PGSC0003DMG400016883 PE=3 SV=1 - [M1BEQ3_SOLTU]	22.9036	10.4624	20.48	2	0.969143	1.08542	0.980769	0.93211	0.991861	1.06089	1.09677	1.0561	0.936371	1.03753	0.377806
M0ZPC0	Uncharacterized protein (Fragment) OS=Solanum tuberosum GN=PGSC0003DMG400001980 PE=4 SV=1 - [M0ZPC0_SOLTU]	12.1744	9.23193	8.57	1	1.02906	1.08044	1.01594	0.97042	1.02396	0.962089	0.904559	0.947909	1.09709	0.977912	0.378563
Q70CU6	NADH dehydrogenase subunit F (Fragment) OS=Petunia axillaris GN=ndhF PE=4 SV=1 - [Q70CU6_9SOLA]	40.4019	9.37842	5.92	2	1.01971	0.930576	0.993188	1.16533	1.0272	0.904498	0.905643	1.08215	0.969403	0.965423	0.378986
Q08506	1-aminocyclopropane-1-carboxylate oxidase 1 OS=Petunia hybrida GN=ACO1 PE=1 SV=1 - [ACCO1_PETHY]	29.4726	5.12256	6.95	1	1.00392	1.11615	1.00317	1.02598	1.03731	1.11103	0.972515	0.975886	0.875884	0.983829	0.380453
C3VEV1	HRS201-like protein (Fragment) OS=Solanum melongena GN=HRS PE=2 SV=1 - [C3VEV1_SOLME]	24.1626	9.37842	3.3	1	1.06917	0.995139	0.982882	1.19402	1.0603	1.16614	1.01876	0.904487	0.791212	0.970148	0.380593
K4AZE7	Uncharacterized protein OS=Solanum lycopersicum GN=Solyc01g094060.2 PE=4 SV=1 - [K4AZE7_SOLLC]	197.434	6.75635	0.5	1	0.963782	0.85775	0.996394	1.01688	0.958702	0.90471	1.17579	0.901755	1.21187	1.04853	0.380728
K4B075	Uncharacterized protein OS=Solanum lycopersicum GN=Solyc01g096870.2 PE=3 SV=1 - [K4B075_SOLLC]	39.8076	8.55811	2.5	1	0.890379	1.00035	0.971866	1.08661	0.987302	1.09119	1.07496	0.985597	0.985961	1.03443	0.38093
M1DE29	Uncharacterized protein OS=Solanum tuberosum GN=PGSC0003DMG400037127 PE=4 SV=1 - [M1DE29_SOLTU]	37.2414	4.4751	6.53	1	1.11103	0.920838	0.999893	1.07596	1.02693	1.00532	0.971356	0.972028	0.984551	0.983315	0.380954
B7SFZ8	Geranylgeranyl reductase (Fragment) OS=Physalis sp. P113 GN=GGR PE=4 SV=1 - [B7SFZ8_9SOLA]	19.6241	5.78271	5.23	1	1.03308	1.09686	0.951579	1.05109	1.03315	1.06404	0.944789	1.03712	0.901324	0.986819	0.381079
K4C0D5	Uncharacterized protein OS=Solanum lycopersicum GN=Solyc05g041540.2 PE=4 SV=1 - [K4C0D5_SOLLC]	55.4929	6.23975	4.48	1	1.01067	0.98571	0.796558	1.08039	0.968332	1.08602	0.95412	1.0955	1.00589	1.03538	0.381127
M1A0W3	Uncharacterized protein OS=Solanum tuberosum GN=PGSC0003DMG400004784 PE=4 SV=1 - [M1A0W3_SOLTU]	65.0908	6.21436	3.63	1	0.929537	1.02557	0.892879	1.05163	0.974903	0.941554	0.968445	1.06399	1.16919	1.0358	0.381687
O22508	Probable linoleate 9S-lipoxygenase 8 OS=Solanum tuberosum GN=LOX1.8 PE=2 SV=1 - [LOX18_SOLTU]	409.082	6.23975	4.36	6	1.00649	1.04759	0.979963	0.988454	1.00563	0.952897	1.006	0.969365	1.01486	0.985781	0.382362
M1AGJ2	Uncharacterized protein OS=Solanum tuberosum GN=PGSC0003DMG402008663 PE=4 SV=1 - [M1AGJ2_SOLTU]	15.3347	8.5874	7.14	1	0.975621	1.14597	0.940346	1.03857	1.02513	0.953235	0.99221	0.961382	1.00656	0.978346	0.382469
M0ZQA5	Uncharacterized protein OS=Solanum tuberosum GN=PGSC0003DMG400002231 PE=4 SV=1 - [M0ZQA5_SOLTU]	5.47998	9.53955	33.33	1	1.01123	0.967359	1.05377	1.07176	1.02603	0.936065	1.08459	0.979002	0.948749	0.9871	0.383305
M0ZND7	Uncharacterized protein OS=Solanum tuberosum GN=PGSC0003DMG400001753 PE=4 SV=1 - [M0ZND7_SOLTU]	51.1825	9.1001	6.35	3	1.0807	0.985319	0.997551	0.991948	1.01388	0.907038	0.978437	0.99159	1.04297	0.980008	0.383357
M0ZXU4	Uncharacterized protein OS=Solanum tuberosum GN=PGSC0003DMG400004028 PE=4 SV=1 - [M0ZXU4_SOLTU]	27.0767	5.18604	4.62	2	1.0344	0.895022	0.95965	1.04477	0.98346	0.984992	1.03324	1.01897	1.04358	1.0202	0.383456
M0ZT60	Uncharacterized protein OS=Solanum tuberosum GN=PGSC0003DMG400002911 PE=4 SV=1 - [M0ZT60_SOLTU]	99.3254	5.63037	0.93	1	0.958189	0.831157	1.1259	0.932665	0.961979	1.02937	1.3527	0.888619	1.0203	1.07275	0.383827
K4CS61	Uncharacterized protein OS=Solanum lycopersicum GN=Solyc09g015930.2 PE=3 SV=1 - [K4CS61_SOLLC]	60.8043	7.09326	5.73	1	0.910221	0.944913	1.13209	0.941116	0.982084	0.982144	1.11128	1.01372	1.04242	1.03739	0.384391
M0ZYE9	Uncharacterized protein OS=Solanum tuberosum GN=PGSC0003DMG400004168 PE=4 SV=1 - [M0ZYE9_SOLTU]	27.7345	7.91357	4.82	1	1.00493	0.868382	1.0821	0.983392	0.9847	1.01368	1.28551	0.951669	1.0177	1.06714	0.385223
M1A8J5	Sucrose synthase OS=Solanum tuberosum GN=PGSC0003DMG400006672 PE=3 SV=1 - [M1A8J5_SOLTU]	92.7313	6.53662	5.92	3	1.03431	0.917755	1.04938	0.936767	0.984555	1.00876	1.04006	0.996354	1.03078	1.01899	0.38661
K4AT29	Uncharacterized protein OS=Solanum lycopersicum GN=Solyc01g008310.2 PE=4 SV=1 - [K4AT29_SOLLC]	64.6853	5.63037	1.56	1	0.937315	0.992525	0.886435	1.08075	0.974256	0.933163	1.04035	1.02252	1.1057	1.02543	0.38662
Q43845	Probable sucrose-phosphate synthase OS=Solanum tuberosum GN=SPS PE=2 SV=1 - [SPSA_SOLTU]	534.89	6.39209	1.05	3	0.99885	1.0013	1.15237	1.01045	1.04074	0.945973	1.13971	0.914694	0.914854	0.978809	0.386884
D4I6F6	Granule-bound starch synthase (Fragment) OS=Nicotiana otophora GN=waxy PE=4 SV=1 - [D4I6F6_NICOT]	26.81	6.93213	17.92	1	1.022	1.00716	0.932876	1.16379	1.03146	0.95076	0.807382	1.09025	0.993152	0.960387	0.387246
Q5YEP8	R1 (Fragment) OS=Solanum tuberosum GN=R1 PE=4 SV=1 - [Q5YEP8_SOLTU]	171.682	6.62451	0.58	1	0.96179	1.04386	1.0646	0.834416	0.976165	0.960405	1.053	1.02262	1.09531	1.03283	0.387299
Q8W1A5	Aquaporin-like protein OS=Petunia hybrida GN=TIP1;1 PE=2 SV=1 - [Q8W1A5_PETHY]	25.7172	5.88428	5.6	1	1.02111	0.948194	1.02566	0.973447	0.992104	1.01842	1.00548	1.02449	0.997621	1.0115	0.387328
M1CC94	Histone H2A OS=Solanum tuberosum GN=PGSC0003DMG400025012 PE=3 SV=1 - [M1CC94_SOLTU]	13.8545	10.0522	17.42	2	1.04693	1.00016	0.924659	0.949391	0.980284	1.10888	0.922754	1.01733	1.05097	1.02498	0.387374
M0ZGR0	Uncharacterized protein OS=Solanum tuberosum GN=PGSC0003DMG400000153 PE=4 SV=1 - [M0ZGR0_SOLTU]	19.2148	6.17627	16.76	2	0.850334	0.880908	1.0894	1.02641	0.961763	1.08229	1.25746	0.950708	0.917294	1.05194	0.38745
M1CS91	Uncharacterized protein OS=Solanum tuberosum GN=PGSC0003DMG402028574 PE=4 SV=1 - [M1CS91_SOLTU]	31.4614	6.56592	15.92	4	1.07947	0.997108	0.916006	1.0441	1.00917	0.928326	0.938956	1.03602	0.9726	0.968976	0.389044
M1A3V6	Uncharacterized protein OS=Solanum tuberosum GN=PGSC0003DMG400005572 PE=3 SV=1 - [M1A3V6_SOLTU]	45.2433	7.44482	2.23	1	0.936974	1.06614	0.84882	1.03652	0.972114	1.00975	0.946258	1.06281	1.09077	1.0274	0.389868
M1D1K2	Uncharacterized protein OS=Solanum tuberosum GN=PGSC0003DMG401030861 PE=4 SV=1 - [M1D1K2_SOLTU]	68.3931	8.1626	1.17	1	1.17609	1.06825	0.979182	0.934734	1.03957	1.06406	1.00163	0.979151	0.858713	0.975889	0.38987
M1ALT8	Uncharacterized protein OS=Solanum tuberosum GN=PGSC0003DMG400009912 PE=4 SV=1 - [M1ALT8_SOLTU]	68.1009	5.64307	1.76	1	0.935842	1.00387	1.09157	1.09661	1.03197	1.06824	0.941907	0.978864	0.961479	0.987621	0.390051
M1ATQ7	Uncharacterized protein OS=Solanum tuberosum GN=PGSC0003DMG400011530 PE=3 SV=1 - [M1ATQ7_SOLTU]	42.6814	8.26514	39.35	1	1.08506	1.02387	0.910868	1.07253	1.02308	1.00404	0.906595	1.07164	0.897009	0.969823	0.390395
Q14TB1	Heat shock protein 90 OS=Nicotiana tabacum GN=hsp90 PE=2 SV=1 - [Q14TB1_TOBAC]	52.3198	5.14795	23.75	3	1.01211	0.949163	1.14809	1.04334	1.03817	0.992055	1.05362	0.985391	0.942433	0.993374	0.391182
K4CEL4	Uncharacterized protein OS=Solanum lycopersicum GN=Solyc07g043570.2 PE=4 SV=1 - [K4CEL4_SOLLC]	39.1395	7.95752	5.07	2	1.00223	1.05924	0.985347	1.04329	1.02253	1.04611	0.917207	1.05905	0.884879	0.976811	0.392325
M1BBT2	Uncharacterized protein OS=Solanum tuberosum GN=PGSC0003DMG400016162 PE=4 SV=1 - [M1BBT2_SOLTU]	34.0599	5.17334	19.87	5	1.04217	0.915196	1.06753	1.03331	1.01455	0.932707	0.920651	1.03267	1.01011	0.974034	0.392567
K4BTC4	Uncharacterized protein OS=Solanum lycopersicum GN=Solyc04g071320.2 PE=4 SV=1 - [K4BTC4_SOLLC]	68.9799	5.40186	1.42	1	1.23919	1.08398	0.992414	0.846855	1.04061	0.914054	0.965473	0.927537	1.0227	0.95744	0.393999
K4C5B9	Uroporphyrinogen decarboxylase OS=Solanum lycopersicum GN=Solyc06g048730.2 PE=3 SV=1 - [K4C5B9_SOLLC]	42.6874	8.19189	18.56	1	0.88199	1.01308	0.876313	1.0995	0.96772	1.08245	0.936778	1.08674	1.00522	1.0278	0.394908
K4CGE8	Uncharacterized protein OS=Solanum lycopersicum GN=Solyc07g056150.2 PE=3 SV=1 - [K4CGE8_SOLLC]	23.1757	7.37158	41.04	1	0.985478	1.19977	0.964776	0.96562	1.02891	0.939942	0.953989	1.02597	0.964211	0.971029	0.395676
K4C6V9	Uncharacterized protein OS=Solanum lycopersicum GN=Solyc06g062280.2 PE=4 SV=1 - [K4C6V9_SOLLC]	25.3029	6.80029	3.13	1	1.03095	1.00988	0.806085	0.957417	0.951083	0.944354	0.895064	1.14365	1.11258	1.02391	0.39668
M1A7K0	Serine hydroxymethyltransferase OS=Solanum tuberosum GN=PGSC0003DMG400006396 PE=3 SV=1 - [M1A7K0_SOLTU]	57.3694	8.11865	15.22	1	0.999024	0.992979	0.918765	0.999555	0.977581	0.970268	1.05708	0.934076	1.13442	1.02396	0.396828
M1AXV1	Ubiquitin carboxyl-terminal hydrolase OS=Solanum tuberosum GN=PGSC0003DMG400012557 PE=3 SV=1 - [M1AXV1_SOLTU]	41.6797	6.69775	2.19	1	1.07698	1.00026	0.960237	1.05209	1.02239	1.01628	0.872612	1.01837	1.01808	0.981338	0.397172
Q43780	Ubiquitin conjugating enzyme OS=Solanum lycopersicum GN=LeUBC1 PE=2 SV=1 - [Q43780_SOLLC]	6.7834	5.23682	20	1	0.932535	0.823787	1.16077	0.930085	0.961794	1.0275	1.38056	0.943171	0.955224	1.07661	0.39841
M1D7F6	Uncharacterized protein OS=Solanum tuberosum GN=PGSC0003DMG400033683 PE=4 SV=1 - [M1D7F6_SOLTU]	20.6102	6.53662	4.76	1	1.03854	1.06888	0.7971	0.913704	0.954557	0.951046	0.918907	1.09067	1.16949	1.03253	0.398448
B3RFS2	Chloroplast chlorophyll a/b-binding protein (Fragment) OS=Solanum nigrum GN=PsbS PE=4 SV=1 - [B3RFS2_SOLNI]	21.819	8.85107	31.25	1	1.15872	1.00803	0.918753	1.00659	1.02302	0.999259	0.91327	1.04753	0.91178	0.967961	0.399155
M1BJW9	Uncharacterized protein OS=Solanum tuberosum GN=PGSC0003DMG400018234 PE=3 SV=1 - [M1BJW9_SOLTU]	84.1473	7.04932	4.32	3	1.00614	0.893806	0.979392	0.907123	0.946616	1.28088	0.964497	0.952748	0.924317	1.03061	0.399896
M0ZPR0	Uncharacterized protein OS=Solanum tuberosum GN=PGSC0003DMG400002086 PE=4 SV=1 - [M0ZPR0_SOLTU]	23.2687	5.43994	10.53	1	1.0497	1.19669	0.750815	1.18588	1.04577	0.917345	0.809888	1.05538	0.9694	0.938004	0.400557
M1BFJ9	Branched-chain-amino-acid aminotransferase OS=Solanum tuberosum GN=PGSC0003DMG400017100 PE=3 SV=1 - [M1BFJ9_SOLTU]	38.5266	6.78564	2.23	1	0.932265	1.00709	1.09802	0.907066	0.98611	1.01217	1.04409	0.986616	1.07811	1.03025	0.400758
M1B007	Uncharacterized protein OS=Solanum tuberosum GN=PGSC0003DMG400013068 PE=4 SV=1 - [M1B007_SOLTU]	42.3598	6.66846	2.96	1	1.02265	1.00354	1.02833	1.04335	1.02447	0.923634	0.815406	1.08313	1.03951	0.965419	0.40097
K4DB65	Histone H2A OS=Solanum lycopersicum GN=Solyc12g005270.1 PE=3 SV=1 - [K4DB65_SOLLC]	6.19244	10.7847	28.33	1	0.926375	1.12354	0.819388	0.968069	0.959343	1.0353	0.87609	1.10208	1.13047	1.03599	0.401994
M1AAS7	Uncharacterized protein OS=Solanum tuberosum GN=PGSC0003DMG400007188 PE=3 SV=1 - [M1AAS7_SOLTU]	47.1742	8.67529	4.7	2	0.985624	0.887096	1.04102	1.00367	0.979352	1.30957	1.09641	1.05121	0.842803	1.075	0.402202
Q6RW44	Ly200 protein OS=Capsicum annuum PE=2 SV=1 - [Q6RW44_CAPAN]	14.0487	10.77	30.83	3	0.910365	0.912444	1.20468	0.824328	0.962955	0.945577	1.14847	1.02749	1.07536	1.04922	0.402833
K4BT00	Uncharacterized protein OS=Solanum lycopersicum GN=Solyc04g058070.2 PE=4 SV=1 - [K4BT00_SOLLC]	67.9748	6.93213	1.3	1	0.97557	0.989524	1.08102	1.03449	1.02015	0.956985	0.935364	1.05575	1.00353	0.987906	0.403151
M0ZQ31	Uncharacterized protein OS=Solanum tuberosum GN=PGSC0003DMG400002174 PE=4 SV=1 - [M0ZQ31_SOLTU]	12.3696	7.43018	11.21	1	0.953353	0.976974	1.1587	1.0683	1.03933	0.889591	1.01129	0.935188	1.08997	0.98151	0.403293
Q9MT29	Cystathionine gamma-synthase isoform 2 OS=Solanum tuberosum GN=CgS2 PE=2 SV=1 - [Q9MT29_SOLTU]	58.2479	6.87354	1.85	1	0.976387	0.900657	0.854631	1.09927	0.957737	0.939416	0.968656	1.01364	1.18363	1.02634	0.403883
Q2VCI7	Putative uncharacterized protein OS=Solanum tuberosum PE=3 SV=1 - [Q2VCI7_SOLTU]	10.6207	11.356	55.56	5	0.918547	0.91398	1.19855	0.890882	0.980489	1.03778	1.18979	0.99343	1.01226	1.05831	0.404993
K4CNA9	Uncharacterized protein OS=Solanum lycopersicum GN=Solyc08g077500.2 PE=4 SV=1 - [K4CNA9_SOLLC]	416.597	5.99854	0.62	2	0.965884	0.841736	1.12449	0.90525	0.95934	0.909634	1.14027	0.952767	1.14386	1.03663	0.405213
M1CVD1	Uncharacterized protein OS=Solanum tuberosum GN=PGSC0003DMG400029380 PE=4 SV=1 - [M1CVD1_SOLTU]	35.5258	6.45557	5.78	1	1.01267	1.02463	0.892507	1.1887	1.02963	0.935351	0.964491	0.998108	0.983506	0.970364	0.406074
Q9XG77	Proteasome subunit alpha type-6 OS=Nicotiana tabacum GN=PAA1 PE=1 SV=1 - [PSA6_TOBAC]	13.5789	4.88135	21.67	1	0.958833	1.03321	0.964538	0.975529	0.983027	1.06468	0.881813	1.0511	1.16527	1.04072	0.406229
K4C994	Uncharacterized protein OS=Solanum lycopersicum GN=Solyc06g073760.2 PE=4 SV=1 - [K4C994_SOLLC]	68.7754	8.19189	4.3	1	0.980417	1.11752	0.763469	0.91436	0.943942	0.99175	0.841059	1.16606	1.15815	1.03925	0.406259
K4CHS1	Uncharacterized protein OS=Solanum lycopersicum GN=Solyc07g065950.2 PE=4 SV=1 - [K4CHS1_SOLLC]	151.93	5.97314	1.92	2	0.999704	1.02715	1.14806	0.969088	1.036	0.954527	1.1144	0.938214	0.926095	0.983309	0.406559
K4BU13	Uncharacterized protein OS=Solanum lycopersicum GN=Solyc04g074750.2 PE=4 SV=1 - [K4BU13_SOLLC]	31.075	7.89893	5.04	1	0.989208	1.04753	1.09222	0.96054	1.02238	0.925248	1.04991	0.97132	1.00217	0.98716	0.406939
M1CUK8	Uncharacterized protein OS=Solanum tuberosum GN=PGSC0003DMG400029192 PE=4 SV=1 - [M1CUK8_SOLTU]	67.3501	8.04541	5.53	1	0.892585	0.924677	0.965944	1.12483	0.97701	1.17879	1.11436	1.07728	0.852086	1.05563	0.407863
K4CQ60	Uncharacterized protein OS=Solanum lycopersicum GN=Solyc09g005700.2 PE=3 SV=1 - [K4CQ60_SOLLC]	39.1265	6.18896	6.39	2	0.975777	1.00479	0.925687	1.01381	0.980016	1.09039	0.919105	0.987133	1.09636	1.02325	0.408828
M1CNK7	Uncharacterized protein OS=Solanum tuberosum GN=PGSC0003DMG400027750 PE=3 SV=1 - [M1CNK7_SOLTU]	50.9479	4.88135	25.8	1	1.02562	0.999841	1.05391	1.03697	1.02909	0.839437	0.946419	0.930749	1.14855	0.966288	0.408862
M1AHZ4	Uncharacterized protein OS=Solanum tuberosum GN=PGSC0003DMG400008991 PE=4 SV=1 - [M1AHZ4_SOLTU]	49.3703	6.13818	2.23	1	0.896975	0.979581	0.881385	1.12381	0.970437	1.06541	0.900068	1.04126	1.14099	1.03693	0.409156
K4BM18	Uncharacterized protein OS=Solanum lycopersicum GN=Solyc03g118690.2 PE=4 SV=1 - [K4BM18_SOLLC]	64.0699	8.77783	1.69	1	0.925333	1.01367	0.925007	1.03843	0.97561	1.12039	0.891272	0.990624	1.13682	1.03478	0.409454
M1AU65	Uncharacterized protein OS=Solanum tuberosum GN=PGSC0003DMG400011640 PE=3 SV=1 - [M1AU65_SOLTU]	34.8196	9.62744	9.32	1	0.925155	1.07816	0.789721	1.05201	0.961262	0.930357	1.07442	0.992967	1.13336	1.03278	0.409691
C9E779	RNase Phy5 (Fragment) OS=Petunia hybrida PE=2 SV=1 - [C9E779_PETHY]	18.9669	5.32568	8.93	1	0.960061	0.992512	0.907558	1.06641	0.981635	1.12778	0.921098	1.06182	1.01109	1.03045	0.409731
M1BD50	Uncharacterized protein OS=Solanum tuberosum GN=PGSC0003DMG400016482 PE=3 SV=1 - [M1BD50_SOLTU]	41.3377	7.6792	13.79	1	0.843362	0.998618	1.07215	0.971848	0.971493	1.07117	1.00663	1.19134	0.89508	1.04106	0.409746
Q9XF12	Peptidyl-prolyl cis-trans isomerase OS=Solanum tuberosum GN=PGSC0003DMG400001630 PE=2 SV=1 - [Q9XF12_SOLTU]	17.9139	8.55811	21.64	2	1.00396	1.03685	0.9384	0.972658	0.987968	0.996204	0.973526	1.06706	1.01797	1.01369	0.410015
Q43043	Pectinesterase OS=Petunia integrifolia GN=PPE1 PE=2 SV=1 - [PME_PETIN]	115.714	6.58057	11.56	8	1.02569	1.12739	0.896228	1.04473	1.02351	1.04067	0.941202	0.947744	0.97131	0.97523	0.410248
K4CHG2	Uncharacterized protein OS=Solanum lycopersicum GN=Solyc07g064830.2 PE=4 SV=1 - [K4CHG2_SOLLC]	103.874	6.85889	1.33	1	1.06105	1.12503	0.846537	1.09634	1.03224	0.925291	0.792701	1.06225	1.03659	0.954208	0.410538
Q1W1W5	BTF3 OS=Nicotiana benthamiana PE=2 SV=1 - [Q1W1W5_NICBE]	10.6453	4.41162	39	2	0.933053	1.1081	0.85465	1.00302	0.974706	1.11152	0.92134	1.10226	1.01142	1.03664	0.410677
M1C2A0	Serine/threonine-protein phosphatase OS=Solanum tuberosum GN=PGSC0003DMG400022604 PE=3 SV=1 - [M1C2A0_SOLTU]	35.026	5.0083	11.44	1	1.11481	0.97972	0.932059	1.09111	1.02943	0.936305	1.05699	0.872923	1.03445	0.975167	0.410797
M1BRY0	Uncharacterized protein OS=Solanum tuberosum GN=PGSC0003DMG400020045 PE=4 SV=1 - [M1BRY0_SOLTU]	9.56898	6.78564	22.62	1	1.03485	0.934939	1.16555	0.988432	1.03094	0.91591	1.01487	1.0538	0.926747	0.977833	0.412121
M0ZVF8	Uncharacterized protein OS=Solanum tuberosum GN=PGSC0003DMG402003505 PE=4 SV=1 - [M0ZVF8_SOLTU]	5.876	9.05615	20	1	1.05444	0.98022	0.841538	1.00291	0.969776	0.916389	1.04179	1.02875	1.1037	1.02266	0.412197
M1BCS3	Uncharacterized protein OS=Solanum tuberosum GN=PGSC0003DMG400016402 PE=3 SV=1 - [M1BCS3_SOLTU]	55.1568	8.29443	4.93	2	1.14621	0.931948	0.86327	1.08219	1.00591	0.932607	0.941302	0.723839	1.07953	0.91932	0.41254
K4B2J4	Uncharacterized protein OS=Solanum lycopersicum GN=Solyc01g106260.2 PE=3 SV=1 - [K4B2J4_SOLLC]	71.832	6.25244	9.1	1	1.00205	1.09259	1.01717	1.00464	1.02911	1.0063	1.09388	0.903495	0.944815	0.987124	0.413156
K4AX86	Uncharacterized protein OS=Solanum lycopersicum GN=Solyc01g068400.2 PE=4 SV=1 - [K4AX86_SOLLC]	8.70829	4.44971	10.53	1	0.986781	1.11446	0.91175	1.08246	1.02386	0.913569	0.890445	1.00551	1.06808	0.969401	0.413198
Q84T18	Sucrose synthase OS=Solanum tuberosum PE=1 SV=1 - [Q84T18_SOLTU]	20.7137	8.25049	12.22	1	0.882075	0.939023	1.13257	0.867884	0.955389	0.885412	1.05253	0.974362	1.27394	1.04656	0.41357
K4AYM6	Amidophosphoribosyltransferase OS=Solanum lycopersicum GN=Solyc01g088360.2 PE=3 SV=1 - [K4AYM6_SOLLC]	60.3818	7.47412	1.81	1	0.954125	0.885753	1.08629	1.01619	0.985589	1.15412	1.15242	0.977742	0.919471	1.05094	0.41436
K4CWX5	Uncharacterized protein OS=Solanum lycopersicum GN=Solyc09g098040.2 PE=4 SV=1 - [K4CWX5_SOLLC]	131.796	5.90967	3.26	3	0.986803	0.954581	1.20246	0.976801	1.03016	1.04189	1.0329	0.913976	0.883124	0.967973	0.416398
K4DA24	Uncharacterized protein OS=Solanum lycopersicum GN=Solyc11g068670.1 PE=4 SV=1 - [K4DA24_SOLLC]	61.5873	6.354	2.48	1	1.07278	1.00835	1.1887	0.940535	1.05259	1.00912	1.16364	0.845776	0.876801	0.973835	0.416708
E2GLP5	Defensin-like protein (Fragment) OS=Solanum lycopersicum var. cerasiforme PE=2 SV=1 - [E2GLP5_SOLLC]	39.2892	6.30322	6.63	1	0.964241	0.895123	1.09866	0.985765	0.985948	0.990065	1.11834	0.970295	1.05393	1.03316	0.416817
Q36450	NADH dehydrogenase [ubiquinone] iron-sulfur protein 2 OS=Nicotiana sylvestris GN=NAD7 PE=2 SV=1 - [NDUS2_NICSY]	86.0307	6.07471	3.48	2	0.96989	1.03104	0.878905	1.00756	0.971847	0.924133	0.972781	1.0401	1.17959	1.02915	0.417545
M1BXA1	Uncharacterized protein OS=Solanum tuberosum GN=PGSC0003DMG400021362 PE=4 SV=1 - [M1BXA1_SOLTU]	38.0587	7.18115	2.51	1	0.985029	0.971014	0.873278	1.05644	0.971441	1.03176	0.879815	1.10472	1.09364	1.02748	0.418197
K4B821	Uncharacterized protein OS=Solanum lycopersicum GN=Solyc02g070400.2 PE=4 SV=1 - [K4B821_SOLLC]	95.4491	6.0874	4.78	4	0.983935	0.991548	0.998842	0.968728	0.985763	0.985929	0.967209	1.02069	1.02331	0.999283	0.418546
M1CZC1	Uncharacterized protein OS=Solanum tuberosum GN=PGSC0003DMG400030366 PE=4 SV=1 - [M1CZC1_SOLTU]	247.036	5.74463	3.4	7	0.956167	0.920567	1.09834	0.972369	0.986861	1.00598	1.09891	0.957794	1.05681	1.02987	0.418685
M0ZSL7	Uncharacterized protein OS=Solanum tuberosum GN=PGSC0003DMG400002779 PE=3 SV=1 - [M0ZSL7_SOLTU]	39.5149	5.8335	13.37	4	0.971907	0.987094	0.928917	0.977448	0.966342	0.959148	0.921233	1.03651	1.10452	1.00535	0.419252
Q2VCJ5	40S ribosomal protein S6 OS=Solanum tuberosum GN=PGSC0003DMG400014855 PE=2 SV=1 - [Q2VCJ5_SOLTU]	28.2615	10.6968	40.56	4	0.977791	1.06794	0.93654	0.95631	0.984645	0.97609	0.978453	1.1121	1.02096	1.0219	0.420183
K4CCG4	Uncharacterized protein OS=Solanum lycopersicum GN=Solyc07g017490.2 PE=4 SV=1 - [K4CCG4_SOLLC]	33.5816	5.04639	3	1	0.997177	1.01835	1.07932	1.05039	1.03631	1.09761	0.943404	1.04173	0.863258	0.986499	0.420298
M1ALV1	Peptidyl-prolyl cis-trans isomerase OS=Solanum tuberosum GN=PGSC0003DMG400009916 PE=4 SV=1 - [M1ALV1_SOLTU]	17.5571	9.39307	19.5	3	1.01114	1.02169	0.958382	1.00908	1.00007	0.989252	0.993343	1.09786	1.02171	1.02554	0.420407
Q3HRZ0	Putative cinnamoyl-CoA reductase-like protein OS=Solanum tuberosum GN=PGSC0003DMG400025373 PE=2 SV=1 - [Q3HRZ0_SOLTU]	35.6542	5.18604	7.72	2	1.00638	0.923643	1.07969	1.05874	1.01711	0.974093	0.967887	0.993695	1.00206	0.984434	0.421299
M1BP06	Uncharacterized protein OS=Solanum tuberosum GN=PGSC0003DMG400019266 PE=3 SV=1 - [M1BP06_SOLTU]	19.5686	9.93506	9.09	2	1.01387	1.08329	0.91649	1.02442	1.00952	0.99956	0.918645	1.04342	0.914957	0.969145	0.421577
K4D2D3	Uncharacterized protein OS=Solanum lycopersicum GN=Solyc10g078920.1 PE=4 SV=1 - [K4D2D3_SOLLC]	21.7504	9.29053	4.3	1	0.994065	1.00872	0.959319	1.04485	1.00174	0.994965	1.0158	0.983897	0.915037	0.977424	0.421605
M1CSB1	Uncharacterized protein OS=Solanum tuberosum GN=PGSC0003DMG402028588 PE=3 SV=1 - [M1CSB1_SOLTU]	50.9307	6.80029	11.19	2	1.01399	1.04254	0.980829	0.965643	1.00075	1.06965	0.978289	1.0212	1.0214	1.02263	0.421943
M1D5D7	Uncharacterized protein OS=Solanum tuberosum GN=PGSC0003DMG400032169 PE=3 SV=1 - [M1D5D7_SOLTU]	31.6303	9.31982	24.24	4	1.04214	1.03586	0.895004	1.08183	1.01371	0.975476	0.909588	1.05081	0.942951	0.969705	0.422423
M1ANJ7	Uncharacterized protein OS=Solanum tuberosum GN=PGSC0003DMG400010304 PE=4 SV=1 - [M1ANJ7_SOLTU]	77.9331	9.21729	7.24	1	0.995748	1.1231	0.954427	1.00183	1.01878	0.902288	0.963765	1.02721	1.02111	0.978592	0.423073
M1ADI8	Uncharacterized protein OS=Solanum tuberosum GN=PGSC0003DMG400007906 PE=4 SV=1 - [M1ADI8_SOLTU]	19.95	7.78174	17.93	4	1.02288	1.10582	1.06954	1.06211	1.06509	1.13019	1.14658	0.82875	0.813447	0.979742	0.423681
Q2V9B4	Patatin-like protein 1 OS=Solanum tuberosum PE=2 SV=1 - [Q2V9B4_SOLTU]	18.3056	9.21729	9.88	1	1.10306	0.953484	1.0711	0.979166	1.0267	0.845185	0.868472	1.08468	1.05757	0.963978	0.424373
M1F1Q7	Ribulose bisphosphate carboxylase large chain (Fragment) OS=Cestrum nocturnum GN=rbcL PE=3 SV=1 - [M1F1Q7_CESNO]	12.3855	9.23193	38.94	1	1.19222	0.906395	0.899905	1.17066	1.0423	1.05382	0.849257	1.06312	0.858842	0.95626	0.424697
M1AX28	Uncharacterized protein OS=Solanum tuberosum GN=PGSC0003DMG400012387 PE=3 SV=1 - [M1AX28_SOLTU]	109.787	5.71924	9.79	1	1.08697	0.969887	1.02569	1.00708	1.02241	0.911735	0.88256	1.0058	1.0978	0.974474	0.424995
K4B0U7	Uncharacterized protein OS=Solanum lycopersicum GN=Solyc01g099100.2 PE=4 SV=1 - [K4B0U7_SOLLC]	76.9642	7.26904	1.72	1	0.90391	1.09256	1.1901	1.03219	1.05469	1.00667	1.14991	0.923107	0.828047	0.976933	0.42508
Q2V987	Transcription factor APFI-like OS=Solanum tuberosum PE=1 SV=1 - [Q2V987_SOLTU]	19.8931	8.27979	6.11	1	0.932956	0.9685	1.19788	1.06555	1.04122	0.899812	1.10126	0.92365	0.984329	0.977262	0.425314
M1BWY3	Uncharacterized protein OS=Solanum tuberosum GN=PGSC0003DMG400021285 PE=4 SV=1 - [M1BWY3_SOLTU]	32.8802	5.66846	5.17	1	1.09227	1.29589	1.001	0.843144	1.05807	1.10935	0.997606	0.866401	0.874709	0.962018	0.42536
M0ZZZ3	Uncharacterized protein OS=Solanum tuberosum GN=PGSC0003DMG400004594 PE=3 SV=1 - [M0ZZZ3_SOLTU]	39.9755	7.53271	11.88	3	0.935192	1.05172	0.94972	1.01672	0.98834	0.889684	0.935423	1.01395	0.982085	0.955286	0.426145
M1CR82	Uncharacterized protein OS=Solanum tuberosum GN=PGSC0003DMG400028375 PE=4 SV=1 - [M1CR82_SOLTU]	28.0924	6.7124	15.83	4	0.991632	1.01078	1.05092	0.968801	1.00553	0.976004	1.02906	1.04355	1.0591	1.02693	0.426146
K4BDE0	Uncharacterized protein OS=Solanum lycopersicum GN=Solyc02g093440.2 PE=3 SV=1 - [K4BDE0_SOLLC]	39.145	6.96143	3.68	1	0.997169	1.0699	1.01244	1.02044	1.02499	1.01498	0.841462	1.06084	1.00257	0.979961	0.426387
K4C7Y9	Uncharacterized protein OS=Solanum lycopersicum GN=Solyc06g068140.2 PE=4 SV=1 - [K4C7Y9_SOLLC]	38.4307	4.95752	4.25	2	0.959384	1.06725	0.887831	1.00863	0.980774	1.0499	0.924867	1.0893	1.03596	1.02501	0.426449
M1CE82	Uncharacterized protein OS=Solanum tuberosum GN=PGSC0003DMG400025503 PE=4 SV=1 - [M1CE82_SOLTU]	6.04734	10.4478	22.64	1	0.997302	1.09852	0.759521	1.01166	0.966751	1.09534	0.957317	1.07083	1.02178	1.03632	0.426562
Q2XTB7	Transaldolase-like OS=Solanum tuberosum PE=2 SV=1 - [Q2XTB7_SOLTU]	41.4444	5.18604	15.04	5	0.929172	0.982316	0.923063	1.0454	0.969988	0.934266	1.05741	0.958558	1.09317	1.01085	0.426705
P93395	Proteasome subunit beta type-6 OS=Nicotiana tabacum PE=2 SV=1 - [PSB6_TOBAC]	25.1676	5.37646	11.54	2	0.980936	1.04324	0.977701	0.937582	0.984865	0.985843	1.09239	0.988003	0.989552	1.01395	0.426976
F1C935	Geranylgeranyl pyrophosphate synthase 4 OS=Solanum pennellii PE=2 SV=1 - [F1C935_SOLPN]	29.8461	7.88428	2.92	1	0.99333	1.08601	0.939956	1.05756	1.01921	0.920745	1.04273	0.980382	0.991938	0.983948	0.427464
K4AY92	Uncharacterized protein OS=Solanum lycopersicum GN=Solyc01g086990.2 PE=4 SV=1 - [K4AY92_SOLLC]	85.4791	5.98584	1.49	1	1.11332	1.01308	0.939755	1.07391	1.03501	1.00161	1.11747	0.913434	0.888007	0.98013	0.428317
M0ZTZ3	Uncharacterized protein OS=Solanum tuberosum GN=PGSC0003DMG400003111 PE=4 SV=1 - [M0ZTZ3_SOLTU]	27.832	5.30029	4.8	1	0.963882	1.05015	1.10361	1.02917	1.03671	1.00853	1.11469	0.93923	0.887729	0.987546	0.428587
M0ZU44	Elongation factor Ts OS=Solanum tuberosum GN=PGSC0003DMG400003138 PE=3 SV=1 - [M0ZU44_SOLTU]	114.201	4.79248	12.1	2	0.988052	1.13829	0.943091	1.03918	1.02715	1.05915	0.985164	0.956184	0.937077	0.984395	0.428718
F4YGE3	Photosystem II reaction center protein Z OS=Solanum delagoense GN=psbZ PE=3 SV=1 - [F4YGE3_9SOLN]	47.3403	5.45264	30.91	2	0.981399	0.938492	1.01858	1.00703	0.986377	0.967758	1.09128	0.982748	1.01617	1.01449	0.428983
K4B9A8	Uncharacterized protein OS=Solanum lycopersicum GN=Solyc02g078840.2 PE=4 SV=1 - [K4B9A8_SOLLC]	20.2922	8.08936	4.44	1	0.986788	1.04542	0.939719	1.03136	1.00082	1.01839	1.04082	1.03919	0.996265	1.02366	0.429411
K4CU54	Uncharacterized protein OS=Solanum lycopersicum GN=Solyc09g064240.2 PE=3 SV=1 - [K4CU54_SOLLC]	37.7996	6.53662	2.87	1	1.06036	0.945849	1.00029	1.06717	1.01842	0.935761	1.00205	1.04784	0.960325	0.986494	0.429493
Q6RVG9	Glutamine synthetase (Fragment) OS=Capsicum annuum PE=2 SV=1 - [Q6RVG9_CAPAN]	26.2099	5.31299	7.11	1	0.901901	1.04664	0.882229	1.04699	0.96944	1.05767	0.895945	1.05495	1.07775	1.02158	0.429726
B7VCB9	Fibrillarin 2 OS=Nicotiana benthamiana GN=fib2 PE=2 SV=1 - [B7VCB9_NICBE]	25.8464	10.1548	16.14	2	1.00604	0.960683	1.05523	0.876531	0.974621	0.937818	0.966747	1.08232	1.09965	1.02163	0.430438
K4DCC5	Uncharacterized protein OS=Solanum lycopersicum GN=Solyc12g010380.1 PE=3 SV=1 - [K4DCC5_SOLLC]	67.4136	8.1333	5.94	2	0.96133	0.908706	1.05814	0.972199	0.975093	0.982467	1.28508	0.951477	0.978761	1.04945	0.430778
M0ZIP7	Uncharacterized protein OS=Solanum tuberosum GN=PGSC0003DMG400000579 PE=4 SV=1 - [M0ZIP7_SOLTU]	22.3019	4.57666	8.33	1	0.935294	0.899193	1.07894	0.963639	0.969266	1.02703	1.08148	1.03001	0.915284	1.01345	0.431082
Q1I0X5	Pyruvate kinase OS=Capsicum annuum PE=2 SV=1 - [Q1I0X5_CAPAN]	48.7132	6.55127	9.09	1	0.949943	1.05709	0.820978	0.994281	0.955573	0.949204	0.888293	1.11335	1.13813	1.02224	0.432507
M1ACQ5	Uncharacterized protein OS=Solanum tuberosum GN=PGSC0003DMG402007686 PE=4 SV=1 - [M1ACQ5_SOLTU]	31.328	8.52881	5.88	2	1.00541	1.07621	0.954035	1.03051	1.01654	1.03899	0.8867	0.949478	1.03827	0.97836	0.432608
K4CGI6	Uncharacterized protein OS=Solanum lycopersicum GN=Solyc07g056540.2 PE=4 SV=1 - [K4CGI6_SOLLC]	34.458	8.77783	35.37	4	0.980689	0.900495	1.19971	1.09419	1.04377	0.896229	1.15516	0.972031	0.828606	0.963006	0.43318
K4CR56	Uncharacterized protein OS=Solanum lycopersicum GN=Solyc09g010280.2 PE=4 SV=1 - [K4CR56_SOLLC]	99.2864	7.53271	1.02	1	0.988318	0.908593	0.89772	1.06445	0.964771	1.10223	0.992602	0.855474	1.19068	1.03525	0.433219
I2G7X5	DNA-directed RNA polymerase (Fragment) OS=Withania sp. OA8 GN=rpoC1 PE=3 SV=1 - [I2G7X5_9SOLA]	15.8973	8.36768	9.86	1	0.971761	0.977174	1.36283	0.98015	1.07298	0.870864	1.23021	0.899263	0.849064	0.962349	0.434138
K4CUL6	Uncharacterized protein OS=Solanum lycopersicum GN=GR PE=3 SV=1 - [K4CUL6_SOLLC]	40.7175	8.48486	8.49	1	1.10728	1.01807	1.04041	1.01958	1.04634	1.0764	1.02795	1.0518	0.752522	0.977168	0.434585
M1B7W9	Uncharacterized protein OS=Solanum tuberosum GN=PGSC0003DMG400015156 PE=4 SV=1 - [M1B7W9_SOLTU]	82.1505	6.41748	5.42	4	0.966113	0.850521	0.925231	1.07034	0.95305	0.91328	0.935846	1.02179	1.23412	1.02626	0.434696
K4D4E6	Uncharacterized protein OS=Solanum lycopersicum GN=Solyc11g005330.1 PE=3 SV=1 - [K4D4E6_SOLLC]	22.4785	6.18896	4.66	1	0.910347	0.955632	1.03645	1.06783	0.992564	1.11228	1.0054	1.00687	0.997994	1.03064	0.435378
M0ZVV4	DNA-directed RNA polymerase OS=Solanum tuberosum GN=PGSC0003DMG400003590 PE=3 SV=1 - [M0ZVV4_SOLTU]	204.332	6.07471	1.36	2	1.04286	0.935308	0.983631	1.01301	0.993701	1.1272	0.992386	0.966767	1.03011	1.02911	0.436369
M1ABL9	Uncharacterized protein OS=Solanum tuberosum GN=PGSC0003DMG401007403 PE=4 SV=1 - [M1ABL9_SOLTU]	48.1185	6.82959	4.17	2	0.894005	0.961396	1.10792	0.941503	0.976206	1.02517	1.24001	0.915946	1.00271	1.04596	0.436603
M1AYL5	Uncharacterized protein OS=Solanum tuberosum GN=PGSC0003DMG400012707 PE=4 SV=1 - [M1AYL5_SOLTU]	20.5824	6.40479	6.78	1	0.931208	0.935042	1.11981	0.962002	0.987016	1.01353	1.09121	0.949414	1.08023	1.03359	0.436806
M1AXK9	Uncharacterized protein (Fragment) OS=Solanum tuberosum GN=PGSC0003DMG400012495 PE=3 SV=1 - [M1AXK9_SOLTU]	22.2808	9.01221	4.33	1	1.05619	0.995227	0.973769	1.04446	1.01741	0.999542	0.861354	1.04289	1.01273	0.97913	0.437618
K4C1Q1	Uncharacterized protein OS=Solanum lycopersicum GN=Solyc05g052200.2 PE=4 SV=1 - [K4C1Q1_SOLLC]	88.5325	7.07861	1.34	1	1.0804	1.06407	0.867991	1.10492	1.02934	1.02705	0.850024	1.04665	0.959605	0.97083	0.437889
M1C5B8	Serine/threonine-protein phosphatase OS=Solanum tuberosum GN=PGSC0003DMG400023403 PE=3 SV=1 - [M1C5B8_SOLTU]	36.7644	5.73193	8	1	0.923656	1.05533	1.10671	1.03095	1.02916	1.00738	0.867755	0.97589	1.07373	0.981188	0.438063
M0ZP02	Uncharacterized protein OS=Solanum tuberosum GN=PGSC0003DMG400001912 PE=4 SV=1 - [M0ZP02_SOLTU]	57.9601	5.96045	5.34	3	0.958001	1.0301	0.980255	1.04026	1.00215	1.04818	1.04094	1.00406	0.995022	1.02205	0.438229
M1BAW9	Uncharacterized protein OS=Solanum tuberosum GN=PGSC0003DMG400015903 PE=4 SV=1 - [M1BAW9_SOLTU]	22.9241	6.03662	4.88	1	0.973639	0.985755	0.822118	1.0736	0.963778	0.885002	1.06729	1.17172	0.996299	1.03008	0.438303
M1B3S7	Uncharacterized protein OS=Solanum tuberosum GN=PGSC0003DMG400014076 PE=3 SV=1 - [M1B3S7_SOLTU]	11.6252	9.01221	31.43	1	1.01805	1.02684	1.04801	0.983415	1.01908	1.02278	0.963092	1.05182	0.939057	0.994187	0.438772
M1CAU1	Uncharacterized protein OS=Solanum tuberosum GN=PGSC0003DMG400024715 PE=4 SV=1 - [M1CAU1_SOLTU]	47.4524	5.021	17.26	3	0.946746	0.975488	1.01234	0.982285	0.979216	0.942565	1.20701	0.942779	1.04905	1.03535	0.439373
A8HG40	Ribulose bisphosphate carboxylase large chain (Fragment) OS=Lycium cinereum GN=rbcL PE=3 SV=1 - [A8HG40_9SOLA]	24.0281	7.69385	26.98	1	1.05799	0.984422	0.954376	1.17803	1.0437	1.0709	0.895952	1.08602	0.873466	0.981584	0.440129
M0ZQX8	Uncharacterized protein OS=Solanum tuberosum GN=PGSC0003DMG401002397 PE=4 SV=1 - [M0ZQX8_SOLTU]	6.66975	12.2349	16.67	1	0.981841	1.10855	0.830697	0.904631	0.956429	1.00203	0.905879	1.19163	1.00467	1.02605	0.440174
M1BQR5	Uncharacterized protein OS=Solanum tuberosum GN=PGSC0003DMG400019701 PE=4 SV=1 - [M1BQR5_SOLTU]	47.0167	7.85498	13.38	6	0.965131	0.915427	1.02498	1.00636	0.977974	0.932152	0.973316	1.03615	1.15288	1.02363	0.44023
M1AL00	Uncharacterized protein OS=Solanum tuberosum GN=PGSC0003DMG400009698 PE=4 SV=1 - [M1AL00_SOLTU]	176.779	6.55127	18.15	4	1.0343	0.978308	1.10025	1.03909	1.03799	1.06207	1.0863	0.929276	0.889924	0.991894	0.440278
K4CH51	Uncharacterized protein OS=Solanum lycopersicum GN=Solyc07g063680.2 PE=4 SV=1 - [K4CH51_SOLLC]	19.0123	4.85596	15.43	3	0.88331	1.00714	1.0105	0.882484	0.94586	0.814805	1.00434	1.08257	1.16276	1.01612	0.44075
K4BN40	Uncharacterized protein OS=Solanum lycopersicum GN=Solyc03g123410.1 PE=4 SV=1 - [K4BN40_SOLLC]	15.0841	6.52197	9.46	1	1.00062	1.01357	0.890511	0.983797	0.972122	1.06927	0.873197	1.1412	1.01874	1.0256	0.44102
M1APA2	Uncharacterized protein OS=Solanum tuberosum GN=PGSC0003DMG400010475 PE=3 SV=1 - [M1APA2_SOLTU]	30.1606	8.27979	9.96	2	1.06245	1.05379	0.946275	1.03498	1.02437	0.748617	1.00076	1.00676	1.07739	0.958381	0.441071
M1AJA2	Uncharacterized protein OS=Solanum tuberosum GN=PGSC0003DMG400009282 PE=4 SV=1 - [M1AJA2_SOLTU]	38.9062	6.31592	5.81	2	1.06311	1.04188	0.891599	1.09968	1.02407	1.00802	0.864902	1.02065	1.00813	0.975426	0.441153
M1D0Q1	Uncharacterized protein OS=Solanum tuberosum GN=PGSC0003DMG400030653 PE=3 SV=1 - [M1D0Q1_SOLTU]	33.7074	5.04639	18.21	5	0.996901	0.968244	0.988606	1.09806	1.01295	0.923222	0.996695	1.02967	0.981172	0.982689	0.44143
K4AZ55	Uncharacterized protein OS=Solanum lycopersicum GN=Solyc01g091150.2 PE=4 SV=1 - [K4AZ55_SOLLC]	11.532	9.24658	10.78	1	0.951103	0.945326	0.928099	1.09933	0.980965	0.966594	1.07589	0.959368	1.09934	1.0253	0.442122
M1D2E4	Uncharacterized protein OS=Solanum tuberosum GN=PGSC0003DMG400031063 PE=3 SV=1 - [M1D2E4_SOLTU]	47.9636	6.44287	16.44	8	1.02045	1.0182	1.02288	0.995541	1.01427	1.03124	1.03837	0.961127	0.933593	0.991082	0.442275
K4BM13	Uncharacterized protein OS=Solanum lycopersicum GN=Solyc03g118640.2 PE=4 SV=1 - [K4BM13_SOLLC]	144.083	6.48096	0.6	1	0.905098	1.17691	0.962777	1.06407	1.02722	0.913761	0.936364	1.00437	1.0317	0.97155	0.44328
M1BW52	Uncharacterized protein OS=Solanum tuberosum GN=PGSC0003DMG400021092 PE=4 SV=1 - [M1BW52_SOLTU]	41.5526	6.15088	2.62	1	0.978995	1.00054	0.91697	1.06062	0.989281	1.00236	1.03004	1.04459	0.989442	1.01661	0.443555
K4C4Q4	Uncharacterized protein OS=Solanum lycopersicum GN=Solyc06g034330.2 PE=4 SV=1 - [K4C4Q4_SOLLC]	64.4004	7.59131	1.37	1	1.02623	1.13283	0.852298	1.18544	1.0492	1.15812	0.847481	1.00558	0.840207	0.962847	0.443724
M1CDC1	Uncharacterized protein OS=Solanum tuberosum GN=PGSC0003DMG400025281 PE=3 SV=1 - [M1CDC1_SOLTU]	38.6379	7.00537	4.51	1	0.970488	1.0603	0.982541	1.05705	1.01759	1.02225	0.971773	1.0217	0.958564	0.993571	0.443856
K4CJ92	Uncharacterized protein OS=Solanum lycopersicum GN=Solyc08g015620.2 PE=4 SV=1 - [K4CJ92_SOLLC]	30.8266	6.21436	12.32	2	1.12171	1.00418	0.854159	1.08574	1.01645	0.92902	0.929018	1.03829	0.95004	0.961593	0.444216
K4AYW1	Uncharacterized protein OS=Solanum lycopersicum GN=Solyc01g090200.2 PE=3 SV=1 - [K4AYW1_SOLLC]	118.851	6.06201	7.16	6	1.03513	0.980927	1.08722	1.03211	1.03384	1.06231	1.0145	1.00065	0.957788	1.00881	0.444253
K4CC07	Uncharacterized protein OS=Solanum lycopersicum GN=Solyc07g008880.2 PE=4 SV=1 - [K4CC07_SOLLC]	277.363	8.74854	3.78	9	1.01231	0.991452	0.950065	0.989063	0.985722	1.0039	0.994466	1.01497	0.979409	0.998187	0.445464
K4B9Q3	Uncharacterized protein OS=Solanum lycopersicum GN=Solyc02g080320.2 PE=4 SV=1 - [K4B9Q3_SOLLC]	40.1134	8.77783	5.56	1	0.978324	0.84122	1.1003	0.962216	0.970516	0.94723	1.28639	0.970675	0.993071	1.04934	0.445628
M1CSH7	Uncharacterized protein OS=Solanum tuberosum GN=PGSC0003DMG400028629 PE=4 SV=1 - [M1CSH7_SOLTU]	11.1131	9.71533	13.27	1	1.02789	1.08502	1.04281	0.913255	1.01724	0.978429	0.974473	0.987653	0.999184	0.984935	0.445646
M1CAI4	Uncharacterized protein OS=Solanum tuberosum GN=PGSC0003DMG400024638 PE=3 SV=1 - [M1CAI4_SOLTU]	35.5435	8.88037	5.86	2	0.95887	1.01857	0.845462	1.06649	0.972348	1.00618	0.91085	1.08906	1.09243	1.02463	0.44626
K4BDQ0	Uncharacterized protein OS=Solanum lycopersicum GN=Solyc02g094550.2 PE=4 SV=1 - [K4BDQ0_SOLLC]	28.5359	6.12549	4.17	1	1.0428	0.973506	0.936864	1.15604	1.0273	0.962487	0.824849	1.02111	1.06797	0.969104	0.446541
Q9ARH7	Fatty acid hydroperoxide lyase OS=Capsicum annuum PE=2 SV=1 - [Q9ARH7_CAPAN]	54.0909	7.00537	4.38	2	1.00448	0.91678	0.920939	1.01647	0.964666	0.959792	0.882908	1.14462	1.09144	1.01969	0.446868
M1B225	Uncharacterized protein OS=Solanum tuberosum GN=PGSC0003DMG400013551 PE=4 SV=1 - [M1B225_SOLTU]	23.5013	9.51025	44.13	8	1.09366	1.11726	0.95133	0.926755	1.02225	0.902816	0.852986	1.08703	1.01253	0.963841	0.44712
M1BWS1	Uncharacterized protein OS=Solanum tuberosum GN=PGSC0003DMG400021243 PE=4 SV=1 - [M1BWS1_SOLTU]	93.1824	7.34229	1.54	1	0.869691	0.988856	1.17426	0.836098	0.967227	0.963199	1.32595	0.955094	1.00474	1.06225	0.448257
K4CPD8	Uncharacterized protein OS=Solanum lycopersicum GN=Solyc08g081410.2 PE=4 SV=1 - [K4CPD8_SOLLC]	92.9563	4.89404	3.1	2	0.97308	0.981445	1.10081	0.956598	1.00298	0.898698	1.03551	0.93828	0.994273	0.966691	0.448361
M1CFQ4	Uncharacterized protein OS=Solanum tuberosum GN=PGSC0003DMG400025861 PE=3 SV=1 - [M1CFQ4_SOLTU]	47.8055	6.25244	12.86	5	0.935062	0.953259	1.06817	0.954508	0.97775	0.933133	1.01915	0.990418	1.14601	1.02218	0.448849
K4CBE9	Uncharacterized protein OS=Solanum lycopersicum GN=Solyc07g006780.2 PE=4 SV=1 - [K4CBE9_SOLLC]	67.7077	6.31592	3.38	2	0.927388	1.12086	0.922597	1.07794	1.01219	0.866488	0.856717	1.02226	1.06452	0.952495	0.449408
K4AXX8	Uncharacterized protein OS=Solanum lycopersicum GN=Solyc01g080850.2 PE=4 SV=1 - [K4AXX8_SOLLC]	95.2474	6.66846	1.71	1	0.960955	1.06415	1.24338	0.898826	1.04183	0.817629	1.09449	0.957701	0.990361	0.965045	0.449948
M1B9T8	Aspartate aminotransferase OS=Solanum tuberosum GN=PGSC0003DMG400015637 PE=3 SV=1 - [M1B9T8_SOLTU]	44.6747	8.1333	9.36	2	0.950969	1.07059	0.851875	0.977693	0.962782	0.892258	1.00584	1.01261	1.18396	1.02367	0.450866
M1CUF4	Uncharacterized protein OS=Solanum tuberosum GN=PGSC0003DMG400029159 PE=4 SV=1 - [M1CUF4_SOLTU]	12.5329	10.6968	9.17	1	0.99744	0.968739	0.710942	1.04299	0.930027	1.0287	0.748199	1.21824	1.13619	1.03283	0.451199
M0ZT51	Proteasome subunit alpha type OS=Solanum tuberosum GN=PGSC0003DMG400002904 PE=3 SV=1 - [M0ZT51_SOLTU]	27.3009	6.55127	35.77	7	1.00054	0.944888	0.972247	0.995026	0.978175	0.91132	0.984159	1.05587	1.11973	1.01777	0.451497
Q5ECP6	E1 alpha subunit of pyruvate dehydrogenase OS=Petunia hybrida GN=E1aPDH PE=2 SV=1 - [Q5ECP6_PETHY]	43.1827	7.91357	25.38	12	1.01656	1.01585	0.94964	0.997499	0.994888	0.997437	0.960835	1.04323	1.0741	1.0189	0.452091
Q9XJ32	Vetispiradiene synthase 1 OS=Solanum tuberosum GN=PVS1 PE=1 SV=1 - [VTSS1_SOLTU]	149.858	6.48096	3.15	3	1.04482	1.0602	0.918401	0.881395	0.976202	0.990868	1.00428	1.0769	0.995601	1.01691	0.452246
M1CXA3	Uncharacterized protein OS=Solanum tuberosum GN=PGSC0003DMG400029837 PE=4 SV=1 - [M1CXA3_SOLTU]	37.8582	6.41748	4	1	0.974177	0.954435	0.829762	1.11002	0.9671	1.20385	0.859496	1.12108	0.990144	1.04364	0.452536
M1D526	Uncharacterized protein OS=Solanum tuberosum GN=PGSC0003DMG400032122 PE=4 SV=1 - [M1D526_SOLTU]	30.2564	8.23584	12.59	1	1.10139	0.918886	0.990635	1.11372	1.03116	1.06969	0.853217	0.989774	1.00319	0.978968	0.452848
M1AWS1	Uncharacterized protein OS=Solanum tuberosum GN=PGSC0003DMG400012303 PE=4 SV=1 - [M1AWS1_SOLTU]	153.029	4.83057	0.67	1	0.937558	0.983523	1.13944	0.845741	0.976565	1.01338	1.15804	0.887169	1.12634	1.04623	0.453034
M1CU02	Uncharacterized protein OS=Solanum tuberosum GN=PGSC0003DMG400029027 PE=4 SV=1 - [M1CU02_SOLTU]	30.2712	9.24658	10.51	3	1.05196	1.02989	0.894691	1.0963	1.01821	0.910423	0.873213	1.07459	1.01139	0.967405	0.453314
M1C9E1	Chorismate synthase OS=Solanum tuberosum GN=PGSC0003DMG400024392 PE=3 SV=1 - [M1C9E1_SOLTU]	47.729	7.26904	16.78	3	0.949684	1.0905	1.00589	1.02042	1.01662	0.992625	1.06159	0.89183	0.974698	0.980186	0.453391
K4D4L5	Uncharacterized protein OS=Solanum lycopersicum GN=Solyc11g006020.1 PE=4 SV=1 - [K4D4L5_SOLLC]	18.0842	8.68994	5.63	1	1.07037	0.974086	0.947574	1.12883	1.03021	1.04336	0.855105	1.10012	0.887001	0.971395	0.453557
P93349	Probable xyloglucan endotransglucosylase/hydrolase protein OS=Nicotiana tabacum GN=XTH PE=2 SV=1 - [XTH_TOBAC]	33.8609	8.44092	7.12	2	1.08289	1.0235	0.844169	0.989699	0.985066	1.05963	1.01957	1.00647	1.03078	1.02911	0.4541
K4AT06	40S ribosomal protein S27 OS=Solanum lycopersicum GN=Solyc01g008080.2 PE=3 SV=1 - [K4AT06_SOLLC]	6.79442	8.35303	21.67	1	0.993091	0.946727	0.900223	0.99169	0.957933	0.953445	0.864933	1.09844	1.14067	1.01437	0.454459
K4D598	Uncharacterized protein OS=Solanum lycopersicum GN=Solyc11g008380.1 PE=3 SV=1 - [K4D598_SOLLC]	44.0347	7.21045	5.67	2	0.947789	1.00628	0.973443	0.995707	0.980805	1.18031	0.989327	0.94571	0.989741	1.02627	0.455082
M1BA24	Uncharacterized protein OS=Solanum tuberosum GN=PGSC0003DMG402015684 PE=4 SV=1 - [M1BA24_SOLTU]	16.7225	11.4731	5.7	1	1.03569	1.01813	0.943246	1.06478	1.01546	1.01456	0.96277	1.00402	0.987274	0.992157	0.455109
K7X8C6	Ubiquitin-conjugating enzyme E2 36 OS=Solanum tuberosum GN=PGSC0003DMG400012390 PE=2 SV=1 - [K7X8C6_SOLTU]	17.237	7.34229	16.99	2	1.03843	1.03466	1.15537	0.999311	1.05694	1.08059	1.15813	0.879529	0.823648	0.985475	0.455288
M1C5S7	Uncharacterized protein OS=Solanum tuberosum GN=PGSC0003DMG400023492 PE=4 SV=1 - [M1C5S7_SOLTU]	8.10007	5.36377	32.47	2	1.00706	0.9982	0.886219	0.986261	0.969435	0.898987	0.955388	1.08741	1.1424	1.02105	0.455488
M1D2W7	Nucleoside diphosphate kinase OS=Solanum tuberosum GN=PGSC0003DMG400031166 PE=3 SV=1 - [M1D2W7_SOLTU]	16.2115	6.80029	12.16	1	0.955773	0.998219	0.927459	1.0288	0.977562	0.921582	0.994591	1.07393	1.05133	1.01036	0.455708
M1BW47	Uncharacterized protein OS=Solanum tuberosum GN=PGSC0003DMG400021087 PE=4 SV=1 - [M1BW47_SOLTU]	29.8413	8.95361	3.83	1	1.04254	0.975312	1.11017	1.0312	1.0398	1.15758	0.890214	0.9251	0.971126	0.986006	0.456174
K4BUV1	Uncharacterized protein OS=Solanum lycopersicum GN=Solyc04g078660.1 PE=4 SV=1 - [K4BUV1_SOLLC]	50.5653	6.68311	3.13	1	1.03213	0.839471	0.962533	1.09588	0.982502	1.2007	1.00298	0.950283	1.02205	1.044	0.456489
M1CSB2	Uncharacterized protein OS=Solanum tuberosum GN=PGSC0003DMG400028589 PE=4 SV=1 - [M1CSB2_SOLTU]	44.1217	5.05908	3.75	1	0.948147	1.02187	1.02094	1.11459	1.02639	0.961793	1.08214	0.91768	0.989165	0.987695	0.457085
M0ZPZ5	Uncharacterized protein OS=Solanum tuberosum GN=PGSC0003DMG400002146 PE=4 SV=1 - [M0ZPZ5_SOLTU]	32.78	8.66064	16.35	5	1.00508	1.06494	1.00577	0.993709	1.01737	1.04561	0.921775	1.03854	0.949317	0.988811	0.457902
Q9FR30	Ripening regulated protein DDTFR10 OS=Solanum lycopersicum GN=DDTFR10 PE=2 SV=1 - [Q9FR30_SOLLC]	22.1802	4.84326	19.02	3	1.01255	1.12371	0.922344	1.04035	1.02474	1.01522	0.940944	1.00829	0.987422	0.987968	0.458025
I6N983	Photosystem II reaction center protein T OS=Datura stramonium GN=psbT PE=3 SV=1 - [I6N983_DATST]	66.1959	6.06201	1.37	1	0.853649	0.976091	1.08302	0.925616	0.959593	0.835732	1.19816	0.934254	1.21744	1.0464	0.458105
K4C907	Uncharacterized protein OS=Solanum lycopersicum GN=Solyc06g072870.1 PE=3 SV=1 - [K4C907_SOLLC]	54.9187	6.48096	3.27	2	1.03235	1.07771	0.906655	1.10225	1.02974	0.96786	0.87106	1.04471	1.04518	0.982203	0.45817
M1CGU7	Uncharacterized protein OS=Solanum tuberosum GN=PGSC0003DMG400026121 PE=4 SV=1 - [M1CGU7_SOLTU]	22.7251	7.44482	14.49	2	1.04855	1.03809	0.963631	1.00452	1.0137	0.992107	0.946729	1.02896	1.00518	0.993245	0.45831
Q6TS30	ENOD40 OS=Solanum lycopersicum GN=ENOD40 PE=4 SV=1 - [Q6TS30_SOLLC]	91.1891	7.57666	9.95	1	0.995973	1.08908	0.893928	1.13593	1.02873	0.891651	0.976698	1.11954	0.885432	0.968331	0.459397
K4BN29	Uncharacterized protein OS=Solanum lycopersicum GN=Solyc03g122310.2 PE=3 SV=1 - [K4BN29_SOLLC]	44.944	5.60498	4.38	1	0.986904	0.877041	1.17368	0.897987	0.983903	0.953819	1.17771	1.00358	1.06484	1.04999	0.459572
M1BEB1	Uncharacterized protein OS=Solanum tuberosum GN=PGSC0003DMG400016781 PE=4 SV=1 - [M1BEB1_SOLTU]	59.2118	5.52881	4.4	2	0.981421	1.00234	1.02912	0.955435	0.992078	1.06425	0.958028	0.983691	1.0638	1.01744	0.459605
M1B4K0	Uncharacterized protein OS=Solanum tuberosum GN=PGSC0003DMG400014248 PE=3 SV=1 - [M1B4K0_SOLTU]	102.365	6.63916	24.22	3	0.948413	0.975142	0.967443	1.02113	0.978033	1.03444	1.00633	0.955154	0.987886	0.995951	0.459768
Q84UY2	Alcohol dehydrogenase 3 (Fragment) OS=Petunia hybrida GN=adh3 PE=2 SV=1 - [Q84UY2_PETHY]	40.7848	6.62451	34.49	5	1.03152	0.914393	0.984578	0.85864	0.947283	0.882803	0.951684	1.00858	1.19002	1.00827	0.460361
M1AYK4	Uncharacterized protein OS=Solanum tuberosum GN=PGSC0003DMG401012699 PE=4 SV=1 - [M1AYK4_SOLTU]	32.0309	6.45557	8.8	3	1.05215	1.07321	0.896788	1.06518	1.02183	1.02352	0.876763	1.05318	0.952531	0.976497	0.460626
K4BRL8	Uncharacterized protein OS=Solanum lycopersicum GN=Solyc04g048900.2 PE=3 SV=1 - [K4BRL8_SOLLC]	48.5111	6.354	4.84	2	0.92958	1.11864	0.781796	0.957071	0.946771	0.987366	0.836267	1.04698	1.28324	1.03846	0.460648
K4BU47	Glucose-6-phosphate isomerase OS=Solanum lycopersicum GN=GPI PE=3 SV=1 - [K4BU47_SOLLC]	61.3173	5.2749	18.13	9	0.963643	0.925136	1.03421	0.954887	0.96947	1.00272	1.08018	0.906051	1.02652	1.00387	0.460679
M1A524	Uncharacterized protein OS=Solanum tuberosum GN=PGSC0003DMG400005810 PE=4 SV=1 - [M1A524_SOLTU]	10.9807	4.84326	14.71	1	1.1375	0.994845	1.24363	0.872961	1.06223	0.984436	1.20085	0.880302	0.814442	0.970008	0.461131
M1CFH9	Uncharacterized protein OS=Solanum tuberosum GN=PGSC0003DMG400025820 PE=3 SV=1 - [M1CFH9_SOLTU]	120.621	5.60498	12.59	12	0.992134	1.00578	0.99395	1.05625	1.01203	1.04058	0.993821	0.998961	0.924328	0.989423	0.46203
M1B1R3	Uncharacterized protein OS=Solanum tuberosum GN=PGSC0003DMG400013480 PE=3 SV=1 - [M1B1R3_SOLTU]	50.4716	6.80029	7.97	1	0.934966	1.02897	1.00947	1.00038	0.993446	0.959119	1.0518	1.02622	1.02591	1.01576	0.462549
P32518	Deoxyuridine 5'-triphosphate nucleotidohydrolase OS=Solanum lycopersicum PE=2 SV=1 - [DUT_SOLLC]	892.676	5.57959	1.26	3	0.973396	1.02421	1.12241	0.958455	1.01962	1.01922	0.993852	0.935297	0.997948	0.986579	0.463943
M1A0J5	Uncharacterized protein OS=Solanum tuberosum GN=PGSC0003DMG400004714 PE=3 SV=1 - [M1A0J5_SOLTU]	54.0523	7.50342	2.71	1	1.02607	0.939928	1.003	1.10697	1.01899	0.880116	0.989601	1.03112	1.02214	0.980745	0.464301
K4B260	Uncharacterized protein OS=Solanum lycopersicum GN=Solyc01g104880.2 PE=4 SV=1 - [K4B260_SOLLC]	72.4066	6.02393	1.7	1	1.06453	0.914215	0.810543	1.0786	0.966971	0.996208	0.920748	1.1108	1.08394	1.02793	0.464446
M0ZY84	Uncharacterized protein OS=Solanum tuberosum GN=PGSC0003DMG400004122 PE=3 SV=1 - [M0ZY84_SOLTU]	18.7701	10.1841	33.93	4	0.941652	1.05981	0.990723	0.976949	0.992284	1.09006	1.0289	0.933152	1.0469	1.02475	0.464557
Q03666	Probable glutathione S-transferase OS=Nicotiana tabacum PE=2 SV=1 - [GSTX4_TOBAC]	25.7722	5.79541	20.36	4	1.05565	0.96276	0.912488	1.14447	1.01884	0.92443	0.910527	1.05399	0.99341	0.970589	0.46462
M1BJJ0	Uncharacterized protein OS=Solanum tuberosum GN=PGSC0003DMG400018148 PE=4 SV=1 - [M1BJJ0_SOLTU]	97.2743	5.79541	3.85	3	1.05238	0.987358	0.999188	0.946018	0.996237	0.998261	1.04017	1.00371	1.01967	1.01545	0.464844
P49212	60S ribosomal protein L37 (Fragment) OS=Solanum lycopersicum GN=RPL37 PE=3 SV=1 - [RL37_SOLLC]	7.25788	11.7222	28.13	2	0.871768	1.18736	1.02295	0.775658	0.964436	1.12131	0.994675	1.01677	1.0325	1.04131	0.465656
M0ZRG6	Uncharacterized protein OS=Solanum tuberosum GN=PGSC0003DMG400002537 PE=3 SV=1 - [M0ZRG6_SOLTU]	64.2728	5.65576	18.84	7	0.96883	1.0154	1.00819	1.10679	1.0248	1.03452	0.961443	1.00786	0.990543	0.99859	0.466027
K4BAW0	Fructose-bisphosphate aldolase OS=Solanum lycopersicum GN=Solyc02g084440.2 PE=3 SV=1 - [K4BAW0_SOLLC]	42.3708	8.00146	34.95	3	1.07982	0.970569	1.01069	1.07399	1.03376	1.05476	1.0498	1.00048	0.872907	0.994488	0.466064
M1AT51	Cytochrome b-c1 complex subunit 6 OS=Solanum tuberosum GN=PGSC0003DMG400011392 PE=3 SV=1 - [M1AT51_SOLTU]	7.98284	7.31299	13.04	1	1.08862	0.952868	1.00826	0.879588	0.982332	0.94151	1.09497	1.03072	1.03222	1.02485	0.4661
M1C5L6	Uncharacterized protein OS=Solanum tuberosum GN=PGSC0003DMG400023464 PE=4 SV=1 - [M1C5L6_SOLTU]	12.4774	6.56592	20.72	1	1.03701	0.989883	0.975517	0.946692	0.987276	0.946429	0.975475	1.05759	1.0947	1.01855	0.466215
M1CMQ3	Uncharacterized protein OS=Solanum tuberosum GN=PGSC0003DMG400027526 PE=3 SV=1 - [M1CMQ3_SOLTU]	61.1141	6.88818	6.76	2	1.0483	0.931128	1.18933	0.94399	1.02819	0.949773	1.06486	0.926093	0.958832	0.974889	0.46777
M1AJP6	Uncharacterized protein OS=Solanum tuberosum GN=PGSC0003DMG400009358 PE=3 SV=1 - [M1AJP6_SOLTU]	46.7853	5.97314	7.02	2	0.97168	0.997386	1.08272	1.13285	1.04616	1.01656	1.04591	0.915335	1.0543	1.00803	0.468237
Q9M7J4	MAR-binding filament-like protein 1-1 OS=Nicotiana tabacum GN=MFP1-1 PE=2 SV=1 - [MFP1_TOBAC]	156.145	6.88818	1.59	2	0.935459	0.936215	1.097	0.943515	0.978047	0.927537	1.22054	0.941011	1.07188	1.04024	0.468276
M1BE69	Uncharacterized protein OS=Solanum tuberosum GN=PGSC0003DMG400016746 PE=3 SV=1 - [M1BE69_SOLTU]	18.1422	7.91357	12.79	1	0.99909	1.04529	0.943953	1.0814	1.01743	0.984418	0.901203	1.04163	1.01138	0.984656	0.468409
M1AWV2	Uncharacterized protein OS=Solanum tuberosum GN=PGSC0003DMG400012322 PE=4 SV=1 - [M1AWV2_SOLTU]	53.1335	8.01611	18.44	4	1.03132	1.03421	1.05068	0.969689	1.02147	1.05317	1.01794	0.952759	0.97276	0.999158	0.468529
M1D3L2	Uncharacterized protein OS=Solanum tuberosum GN=PGSC0003DMG400031345 PE=3 SV=1 - [M1D3L2_SOLTU]	17.5124	10.6235	29.61	1	1.00211	1.16087	0.860477	0.918017	0.985366	1.07578	1.0138	1.04373	1.02653	1.03996	0.468713
M1CPW4	Uncharacterized protein OS=Solanum tuberosum GN=PGSC0003DMG400028107 PE=4 SV=1 - [M1CPW4_SOLTU]	16.6951	10.6528	10.07	1	0.9224	1.15495	1.02375	1.01053	1.02791	0.950788	0.972835	1.09167	0.903091	0.979596	0.469786
M1CK23	Uncharacterized protein OS=Solanum tuberosum GN=PGSC0003DMG400026913 PE=4 SV=1 - [M1CK23_SOLTU]	35.9594	6.55127	25.39	7	1.05458	1.03672	0.927113	1.09946	1.02947	1.08271	0.921128	1.04524	0.880674	0.982439	0.469791
K4C7V3	Uncharacterized protein OS=Solanum lycopersicum GN=Solyc06g066790.2 PE=4 SV=1 - [K4C7V3_SOLLC]	108.62	7.78174	2	1	1.04652	1.24748	0.84934	1.03065	1.0435	1.10684	0.959516	0.940613	0.868256	0.968807	0.469811
M1ARQ9	Uncharacterized protein OS=Solanum tuberosum GN=PGSC0003DMG400011090 PE=4 SV=1 - [M1ARQ9_SOLTU]	29.2601	7.25439	3.13	1	0.957513	0.977344	1.08389	0.939971	0.98968	0.962234	1.1011	0.981524	1.05469	1.02489	0.470096
K4CRC1	Uncharacterized protein OS=Solanum lycopersicum GN=Solyc09g010950.2 PE=3 SV=1 - [K4CRC1_SOLLC]	89.7877	8.5874	2.58	1	1.04173	0.964357	0.967904	1.00175	0.993934	0.979544	1.04841	0.990437	1.03259	1.01275	0.470768
K4B6K0	Uncharacterized protein OS=Solanum lycopersicum GN=Solyc02g063130.2 PE=4 SV=1 - [K4B6K0_SOLLC]	27.8499	4.43701	7.22	2	0.960772	1.02036	0.993394	0.943422	0.979487	0.928075	1.02455	0.968517	1.1918	1.02823	0.471097
M1C7V7	Uncharacterized protein OS=Solanum tuberosum GN=PGSC0003DMG400024011 PE=3 SV=1 - [M1C7V7_SOLTU]	62.9953	5.87158	26.04	9	0.941637	0.963821	1.0013	1.07125	0.994501	1.05934	1.0687	0.99169	0.972715	1.02311	0.471618
M1DQG3	Uncharacterized protein OS=Solanum tuberosum GN=PGSC0003DMG400042316 PE=4 SV=1 - [M1DQG3_SOLTU]	25.2277	9.72998	6.25	1	0.956979	1.01113	1.02465	0.967354	0.990027	0.938869	1.07626	0.993791	1.06473	1.01841	0.4718
M1BN71	Uncharacterized protein OS=Solanum tuberosum GN=PGSC0003DMG400019063 PE=4 SV=1 - [M1BN71_SOLTU]	53.2881	7.94287	17.92	7	0.965098	0.899194	1.08909	0.983374	0.984188	1.02145	1.07297	0.993195	0.987348	1.01874	0.471991
M1ASA9	Uncharacterized protein OS=Solanum tuberosum GN=PGSC0003DMG400011208 PE=4 SV=1 - [M1ASA9_SOLTU]	52.2251	6.48096	3.23	2	0.986856	1.01761	0.966661	0.989951	0.990269	1.03552	0.93156	1.04555	1.04195	1.01364	0.47223
M1BQZ1	Uncharacterized protein OS=Solanum tuberosum GN=PGSC0003DMG400019748 PE=3 SV=1 - [M1BQZ1_SOLTU]	42.0858	8.14795	6.14	1	0.915406	1.13825	1.30629	0.886155	1.06153	1.02944	1.03549	1.03092	0.788824	0.971166	0.472411
Q5UNS2	Arginase 1 OS=Solanum lycopersicum GN=ARG1 PE=2 SV=1 - [Q5UNS2_SOLLC]	37.0261	6.39209	6.21	2	1.00786	0.899066	1.02311	1.00998	0.985003	0.953504	1.15885	0.953019	1.05144	1.0292	0.47325
K4DHS4	Uncharacterized protein OS=Solanum lycopersicum GN=Solyc12g099030.1 PE=4 SV=1 - [K4DHS4_SOLLC]	21.4954	9.72998	41.58	1	0.987932	1.03876	0.851469	0.953549	0.957928	1.04057	0.842127	1.26276	0.98786	1.03333	0.473381
K4DHJ5	Uncharacterized protein OS=Solanum lycopersicum GN=Solyc12g098210.1 PE=4 SV=1 - [K4DHJ5_SOLLC]	160.979	7.59131	5.89	3	0.980588	1.02976	0.897366	1.06117	0.992221	0.954988	0.835522	1.04186	0.966079	0.949612	0.473536
M1CB98	Uncharacterized protein OS=Solanum tuberosum GN=PGSC0003DMG400024802 PE=4 SV=1 - [M1CB98_SOLTU]	39.3444	6.52197	9.22	3	0.999721	0.997137	0.815081	0.970057	0.945499	0.931843	0.812375	1.20586	1.1543	1.02609	0.473663
Q94KA9	Importin subunit alpha OS=Capsicum annuum PE=2 SV=1 - [Q94KA9_CAPAN]	58.4322	5.43994	13.99	3	0.992231	0.949197	1.1443	1.03698	1.03068	0.979278	1.06465	0.98019	0.946994	0.992778	0.473763
M1ANL7	Uncharacterized protein OS=Solanum tuberosum GN=PGSC0003DMG400010318 PE=4 SV=1 - [M1ANL7_SOLTU]	35.6328	6.48096	2.86	1	0.965353	1.24418	0.90534	1.05661	1.04287	1.11689	0.951981	0.96381	0.857936	0.972654	0.473895
D2CV78	Cytochrome P450-type monooxygenase 97C11 OS=Solanum lycopersicum GN=CYP97C11 PE=2 SV=1 - [D2CV78_SOLLC]	61.2269	6.41748	4.57	3	1.11447	0.980859	0.905337	1.0891	1.02244	1.06008	0.879946	1.0541	0.880072	0.968548	0.473961
K4CUG0	40S ribosomal protein S24 OS=Solanum lycopersicum GN=Solyc09g065330.2 PE=3 SV=1 - [K4CUG0_SOLLC]	30.5447	6.34131	3.36	1	0.852245	0.896954	1.1318	1.01565	0.974163	0.910991	1.08575	0.993609	1.15972	1.03752	0.474625
G1DEX3	Cutin-deficient 1 protein OS=Solanum lycopersicum GN=Solyc11g006250.1 PE=4 SV=1 - [G1DEX3_SOLLC]	39.4609	7.60596	5.28	1	0.961164	1.01023	1.11791	0.852513	0.985453	1.07103	1.17989	0.978989	0.944245	1.04354	0.475182
M1B4I5	Uncharacterized protein OS=Solanum tuberosum GN=PGSC0003DMG400014238 PE=4 SV=1 - [M1B4I5_SOLTU]	17.4341	9.86182	10.63	2	1.0139	1.03501	1.1052	0.953493	1.0269	1.06692	1.06764	0.871934	0.917175	0.980917	0.475215
K4BGB2	Uncharacterized protein OS=Solanum lycopersicum GN=Solyc03g045000.1 PE=4 SV=1 - [K4BGB2_SOLLC]	76.1573	6.60986	9.01	1	0.921833	0.987117	0.931874	1.07751	0.979583	0.901746	1.01398	1.0624	1.11746	1.0239	0.476257
P49730	Ribonucleoside-diphosphate reductase small chain OS=Nicotiana tabacum PE=2 SV=1 - [RIR2_TOBAC]	1200.68	9.90576	3.97	20	0.989264	1.09087	0.972501	1.02975	1.0206	1.09998	0.948824	1.01166	0.821358	0.970456	0.476945
K4AZB8	Uncharacterized protein OS=Solanum lycopersicum GN=Solyc01g091780.2 PE=4 SV=1 - [K4AZB8_SOLLC]	19.9441	8.76318	3.89	1	1.0615	1.16217	0.891407	0.998983	1.02851	1.04264	0.836073	1.0342	0.975958	0.972216	0.477245
K4DBS4	Uncharacterized protein OS=Solanum lycopersicum GN=Solyc12g008360.1 PE=4 SV=1 - [K4DBS4_SOLLC]	85.7547	9.15869	0.91	1	0.970144	1.04385	0.882042	1.03825	0.983573	0.998743	0.962864	1.03598	1.07368	1.01782	0.47752
M1A2M6	Uncharacterized protein OS=Solanum tuberosum GN=PGSC0003DMG400005189 PE=4 SV=1 - [M1A2M6_SOLTU]	64.3528	4.75439	12.65	5	1.02944	1.0186	0.980914	1.01015	1.00978	0.935304	0.879669	1.03947	1.04928	0.97593	0.477547
M1AQ38	Uncharacterized protein OS=Solanum tuberosum GN=PGSC0003DMG400010682 PE=4 SV=1 - [M1AQ38_SOLTU]	23.5039	5.19873	4.37	1	1.01584	0.953564	0.930387	1.05605	0.988959	0.993448	1.0162	1.09036	0.972616	1.01816	0.477565
K4D479	Uncharacterized protein OS=Solanum lycopersicum GN=Solyc10g086470.1 PE=4 SV=1 - [K4D479_SOLLC]	21.2857	8.17725	3.52	1	1.06069	1.15579	0.911468	0.978124	1.02652	1.05086	0.891398	1.00713	0.964737	0.97853	0.478351
M1B3B4	Uncharacterized protein OS=Solanum tuberosum GN=PGSC0003DMG403013914 PE=4 SV=1 - [M1B3B4_SOLTU]	19.7037	8.06006	10.23	1	1.01711	1.01489	0.780321	1.0273	0.959905	1.07511	0.813116	1.07691	1.17011	1.03381	0.478532
M0ZH89	Uncharacterized protein OS=Solanum tuberosum GN=PGSC0003DMG400000276 PE=3 SV=1 - [M0ZH89_SOLTU]	34.4501	4.97021	10.53	1	0.800253	1.13723	0.936893	1.0295	0.975969	0.996805	1.07018	1.04925	1.02116	1.03435	0.478719
K4D6N3	Uncharacterized protein OS=Solanum lycopersicum GN=LOC543616 PE=4 SV=1 - [K4D6N3_SOLLC]	6.8264	5.14795	20	1	1.01768	0.980988	0.992727	0.999034	0.997608	0.971662	1.01239	1.0369	1.01783	1.00969	0.478744
K4BQ51	Uncharacterized protein OS=Solanum lycopersicum GN=Solyc04g015490.2 PE=4 SV=1 - [K4BQ51_SOLLC]	83.866	5.38916	8.22	2	0.911698	1.03218	1.03417	1.00007	0.994532	1.01794	1.00056	1.02242	1.03094	1.01796	0.478863
M1BGT4	Uncharacterized protein OS=Solanum tuberosum GN=PGSC0003DMG402017409 PE=4 SV=1 - [M1BGT4_SOLTU]	36.3384	8.83643	5.56	1	1.0039	1.0805	0.90425	1.0832	1.01796	0.927574	0.914416	1.03956	1.02844	0.977496	0.478891
Q8LLE5	Filament-like plant protein (Fragment) OS=Solanum lycopersicum GN=FPP PE=1 SV=1 - [FPP_SOLLC]	142.403	5.38916	2.76	1	1.08752	0.981033	0.995162	1.00245	1.01654	0.96079	0.909558	1.02938	1.04608	0.986453	0.479259
Q43187	Soluble inorganic pyrophosphatase OS=Solanum tuberosum GN=PPA PE=2 SV=1 - [IPYR_SOLTU]	249.446	6.13818	6.77	9	1.02994	0.921895	1.03522	0.961741	0.987199	0.939533	1.02752	1.047	1.04799	1.01551	0.480612
K4BLW8	Uncharacterized protein OS=Solanum lycopersicum GN=Solyc03g118170.2 PE=3 SV=1 - [K4BLW8_SOLLC]	34.4531	6.52197	22.67	1	1.00079	0.877803	1.13502	1.11162	1.03131	0.884215	1.0129	1.05595	0.960309	0.978343	0.480616
K4DBL8	Uncharacterized protein OS=Solanum lycopersicum GN=Solyc12g006810.1 PE=4 SV=1 - [K4DBL8_SOLLC]	36.4247	7.47412	3.79	1	1.02352	1.02668	1.02441	1.02244	1.02426	1.04929	0.984291	1.05281	0.883391	0.992447	0.480726
K4D0B7	Uncharacterized protein OS=Solanum lycopersicum GN=Solyc10g049600.1 PE=4 SV=1 - [K4D0B7_SOLLC]	43.9839	5.47803	3.9	1	0.940305	0.923704	1.04238	0.960533	0.96673	0.918634	0.894886	1.08679	1.21869	1.02975	0.480768
M0ZWP5	Uncharacterized protein OS=Solanum tuberosum GN=PGSC0003DMG400003762 PE=4 SV=1 - [M0ZWP5_SOLTU]	137.04	7.28369	5.67	3	0.900648	0.948781	1.07932	0.971365	0.975028	0.913965	1.23592	1.02182	0.97272	1.03611	0.48077
M1A1P3	Uncharacterized protein OS=Solanum tuberosum GN=PGSC0003DMG400004962 PE=4 SV=1 - [M1A1P3_SOLTU]	20.4247	4.85596	46.45	1	0.956741	1.09988	0.895429	0.993755	0.986451	0.982742	0.982956	1.05066	1.08037	1.02418	0.481506
K4CJX3	Uncharacterized protein OS=Solanum lycopersicum GN=Solyc08g029110.2 PE=4 SV=1 - [K4CJX3_SOLLC]	32.6442	6.65381	5.5	1	1.06636	0.97597	1.19192	0.937845	1.04303	1.06647	1.06636	0.961028	0.847276	0.985283	0.481612
M0ZGA8	Uncharacterized protein OS=Solanum tuberosum GN=PGSC0003DMG400000065 PE=4 SV=1 - [M0ZGA8_SOLTU]	46.1707	7.95752	7.43	3	0.95423	1.01149	0.929745	1.02418	0.97991	1.00131	0.966884	0.974953	1.07892	1.00552	0.481697
M1D3Q7	Uncharacterized protein OS=Solanum tuberosum GN=PGSC0003DMG400031388 PE=4 SV=1 - [M1D3Q7_SOLTU]	19.5638	6.29053	22.86	4	0.999096	1.02331	0.993463	0.936837	0.988178	0.933764	1.05923	0.998443	1.07338	1.0162	0.482166
C4PG28	Polygalacturonase inhibiting protein OS=Solanum torvum PE=2 SV=1 - [C4PG28_9SOLN]	36.9052	8.41162	15.2	5	0.975572	0.966725	1.03243	0.933564	0.977073	0.918123	0.990299	1.01156	1.15319	1.01829	0.482534
M0ZPT4	Uncharacterized protein OS=Solanum tuberosum GN=PGSC0003DMG400002103 PE=3 SV=1 - [M0ZPT4_SOLTU]	17.4755	4.81787	20.25	2	1.09063	1.00829	1.21441	0.932133	1.06136	1.2023	0.96684	0.920692	0.870494	0.990082	0.482807
M1C7Y1	Uncharacterized protein OS=Solanum tuberosum GN=PGSC0003DMG401024031 PE=4 SV=1 - [M1C7Y1_SOLTU]	36.8742	5.45264	9.09	1	1.0271	1.02846	1.04753	0.979501	1.02065	0.818207	1.03464	1.0453	1.01065	0.977201	0.483492
K4DCI6	Citrate synthase OS=Solanum lycopersicum GN=Solyc12g011000.1 PE=3 SV=1 - [K4DCI6_SOLLC]	32.6577	6.0874	9	2	1.02924	1.03731	1.12964	0.980302	1.04412	0.894885	1.17533	0.85237	1.01191	0.983624	0.484104
M1B0M9	Glutamine synthetase OS=Solanum tuberosum GN=PGSC0003DMG400013235 PE=3 SV=1 - [M1B0M9_SOLTU]	38.6463	5.88428	9.04	1	1.11661	1.11762	0.934178	0.932934	1.02534	1.01688	0.94342	1.03602	0.923499	0.979953	0.484825
K4CC89	Uncharacterized protein OS=Solanum lycopersicum GN=Solyc07g014700.2 PE=4 SV=1 - [K4CC89_SOLLC]	71.0279	6.65381	3.08	2	0.995264	0.96377	0.963912	1.00157	0.98113	0.935244	0.976381	1.0446	1.06835	1.00614	0.485203
K4DAE9	Uncharacterized protein OS=Solanum lycopersicum GN=Solyc11g069930.1 PE=4 SV=1 - [K4DAE9_SOLLC]	10.2754	7.28369	18.18	1	0.976161	0.986565	0.873571	1.00245	0.959688	0.882324	0.903836	1.22351	1.09657	1.02656	0.485208
K4B0H9	Cysteine synthase OS=Solanum lycopersicum GN=Solyc01g097920.2 PE=3 SV=1 - [K4B0H9_SOLLC]	38.3642	6.94678	10.96	2	1.01906	1.06887	0.940152	1.00551	1.0084	0.992117	0.978294	1.03202	0.930325	0.983189	0.485531
K7ZLE1	Calcium-sensing receptor OS=Nicotiana benthamiana GN=NbCAS PE=2 SV=1 - [K7ZLE1_NICBE]	41.8432	9.39307	14.21	5	0.977389	0.950704	0.992483	1.05049	0.992766	1.00951	1.03625	1.01811	0.980105	1.011	0.486017
M1D7F5	Uncharacterized protein OS=Solanum tuberosum GN=PGSC0003DMG400033683 PE=4 SV=1 - [M1D7F5_SOLTU]	31.0997	5.41455	5.99	2	1.00284	1.08717	0.840395	0.966855	0.974316	1.03575	0.908455	1.10065	1.04716	1.023	0.486572
M1CZB0	Uncharacterized protein OS=Solanum tuberosum GN=PGSC0003DMG400030359 PE=3 SV=1 - [M1CZB0_SOLTU]	33.125	6.31592	28.16	8	1.0022	1.04602	1.12173	0.959261	1.0323	1.00879	1.10708	0.948884	0.894101	0.989714	0.487198
M1A4G8	Uncharacterized protein OS=Solanum tuberosum GN=PGSC0003DMG400005701 PE=4 SV=1 - [M1A4G8_SOLTU]	34.2737	8.57275	3.82	1	1.02547	1.05515	1.11388	0.971946	1.04161	1.15859	0.90522	1.02156	0.857347	0.985679	0.487297
K4DFB6	Uncharacterized protein OS=Solanum lycopersicum GN=Solyc12g044280.1 PE=4 SV=1 - [K4DFB6_SOLLC]	14.9209	9.90576	13.38	2	1.09399	1.04042	0.904283	1.05208	1.02269	1.00126	0.823423	1.07924	0.985785	0.972427	0.487318
K4D245	Proteasome subunit alpha type OS=Solanum lycopersicum GN=Solyc10g077030.1 PE=3 SV=1 - [K4D245_SOLLC]	6.74549	8.90967	40	1	0.923118	0.972834	1.10077	0.938362	0.983771	0.966345	1.12342	0.93188	1.09777	1.02986	0.487968
M0ZXA0	Uncharacterized protein OS=Solanum tuberosum GN=PGSC0003DMG400003913 PE=4 SV=1 - [M0ZXA0_SOLTU]	65.6673	7.45947	6.75	2	1.02641	1.05138	1.22385	0.878693	1.04508	0.970509	1.04447	0.975032	0.963364	0.988344	0.488286
M1AC89	Uncharacterized protein OS=Solanum tuberosum GN=PGSC0003DMG400007562 PE=4 SV=1 - [M1AC89_SOLTU]	82.9716	8.90967	1.03	1	0.919495	0.887895	1.12319	0.864539	0.948779	0.950963	1.01961	0.883279	1.21665	1.01763	0.488867
K4BJA3	Uncharacterized protein OS=Solanum lycopersicum GN=Solyc03g096850.2 PE=4 SV=1 - [K4BJA3_SOLLC]	18.9778	9.72998	14.44	2	1.15898	0.963593	0.98214	0.956514	1.01531	1.02914	0.928303	1.03439	0.891704	0.970884	0.490069
M0ZJY5	Uncharacterized protein OS=Solanum tuberosum GN=PGSC0003DMG400000891 PE=4 SV=1 - [M0ZJY5_SOLTU]	8.35408	4.75439	10.53	1	1.10306	1.02147	0.935563	1.0319	1.023	1.06854	0.890182	1.0414	0.929664	0.982448	0.490214
M1ASR2	Uncharacterized protein OS=Solanum tuberosum GN=PGSC0003DMG400011293 PE=4 SV=1 - [M1ASR2_SOLTU]	21.8904	5.05908	6.93	1	0.930429	0.890682	0.961765	1.00111	0.945996	0.961429	0.786533	1.16459	1.16051	1.01826	0.490254
M1C9S2	Uncharacterized protein OS=Solanum tuberosum GN=PGSC0003DMG400024484 PE=4 SV=1 - [M1C9S2_SOLTU]	154.605	6.06201	0.55	1	0.946071	1.04636	0.873759	1.07344	0.984907	1.06218	0.989098	1.07706	0.969947	1.02457	0.490438
K4AXU0	Uncharacterized protein OS=Solanum lycopersicum GN=Solyc01g080460.2 PE=4 SV=1 - [K4AXU0_SOLLC]	105.786	6.3667	2.18	2	0.987811	1.05708	0.993752	1.03063	1.01732	1.04432	0.969318	0.979974	1.00719	1.0002	0.491174
M1AIA5	Uncharacterized protein OS=Solanum tuberosum GN=PGSC0003DMG400009063 PE=3 SV=1 - [M1AIA5_SOLTU]	16.7172	10.814	26.03	1	1.03676	0.984843	0.954938	0.960444	0.984246	1.18914	1.10863	0.981505	0.877174	1.03911	0.491209
M1ALZ6	Uncharacterized protein OS=Solanum tuberosum GN=PGSC0003DMG400009940 PE=3 SV=1 - [M1ALZ6_SOLTU]	92.676	4.99561	15.38	10	0.977091	0.992887	1.02233	1.02194	1.00356	0.954913	1.02303	0.978696	1.00318	0.989955	0.492812
K4CVW3	Uncharacterized protein OS=Solanum lycopersicum GN=Solyc09g083370.2 PE=3 SV=1 - [K4CVW3_SOLLC]	13.8626	10.1987	17.5	2	0.981584	1.09249	0.892985	0.987835	0.988723	1.01386	0.930208	1.119	1.05762	1.03017	0.493973
K4CWY6	Metacaspase OS=Solanum lycopersicum GN=MCA PE=2 SV=1 - [K4CWY6_SOLLC]	32.8372	5.18604	12.67	3	1.05478	1.02097	0.860818	0.960722	0.974322	0.903046	1.01865	1.05395	1.09391	1.01739	0.494018
P62981	Ubiquitin-40S ribosomal protein S27a OS=Solanum tuberosum GN=UBI3 PE=2 SV=2 - [RS27A_SOLTU]	17.6905	9.78857	50.64	1	0.928867	1.09194	0.839919	1.03853	0.974816	0.990479	0.959846	1.12437	1.02111	1.02395	0.494026
M1BU14	Uncharacterized protein OS=Solanum tuberosum GN=PGSC0003DMG400020502 PE=4 SV=1 - [M1BU14_SOLTU]	49.2878	9.18799	2.28	1	1.18534	0.91276	1.01302	0.999701	1.02771	0.937556	1.04214	1.01775	0.922424	0.97997	0.494183
M1B1I3	Uncharacterized protein OS=Solanum tuberosum GN=PGSC0003DMG401013422 PE=4 SV=1 - [M1B1I3_SOLTU]	38.9453	8.23584	4.83	1	1.08882	0.992476	0.990053	0.816127	0.971869	1.00575	1.1741	0.838998	1.14905	1.04198	0.494187
M0ZQ33	Uncharacterized protein OS=Solanum tuberosum GN=PGSC0003DMG400002175 PE=3 SV=1 - [M0ZQ33_SOLTU]	25.582	5.70654	21.33	1	1.05246	1.09988	0.840789	1.08515	1.01957	0.972473	0.844992	1.04882	0.994697	0.965245	0.494731
M1DC44	Uncharacterized protein OS=Solanum tuberosum GN=PGSC0003DMG400036178 PE=4 SV=1 - [M1DC44_SOLTU]	33.3796	5.5415	4.45	1	1.03884	1.07528	1.01552	1.03497	1.04115	1.08956	1.11427	0.922673	0.818715	0.986304	0.494826
M0ZXD5	Uncharacterized protein OS=Solanum tuberosum GN=PGSC0003DMG400003934 PE=4 SV=1 - [M0ZXD5_SOLTU]	30.1959	10.1548	4.46	1	0.736273	1.15361	0.980178	0.98242	0.963121	1.01957	1.21401	0.801128	1.19109	1.05645	0.495054
M1AGG3	Uncharacterized protein OS=Solanum tuberosum GN=PGSC0003DMG400008639 PE=4 SV=1 - [M1AGG3_SOLTU]	38.2096	7.40088	5.19	2	0.979374	1.01616	1.17249	0.960686	1.03218	1.02236	1.06593	0.930389	0.93938	0.989514	0.495318
K4BCS6	ATP-dependent Clp protease proteolytic subunit OS=Solanum lycopersicum GN=Solyc02g091280.2 PE=3 SV=1 - [K4BCS6_SOLLC]	34.3553	8.26514	8.09	2	0.981197	0.894212	1.064	1.00951	0.987229	1.0242	1.17718	0.913642	1.02367	1.03467	0.495381
Q5Y806	Cysteine proteinase (Fragment) OS=Petunia hybrida GN=CP3 PE=2 SV=1 - [Q5Y806_PETHY]	27.6104	6.41748	6.23	2	1.07404	1.09138	0.889446	1.05131	1.02654	0.978925	0.918967	1.00384	1.04653	0.987067	0.495411
P93400	Phospholipase D alpha 1 OS=Nicotiana tabacum GN=PLD1 PE=1 SV=2 - [PLDA1_TOBAC]	91.908	5.63037	13.99	3	1.01981	1.03049	1.02936	1.00652	1.02155	0.923785	1.03603	0.980492	1.05401	0.998579	0.495646
M1CRT2	Uncharacterized protein OS=Solanum tuberosum GN=PGSC0003DMG402028489 PE=4 SV=1 - [M1CRT2_SOLTU]	42.7449	5.89697	2.1	1	0.92956	1.01964	0.845401	1.09669	0.972823	0.976999	0.939306	1.14926	1.03256	1.02453	0.495657
M1BJP8	Uncharacterized protein OS=Solanum tuberosum GN=PGSC0003DMG400018181 PE=3 SV=1 - [M1BJP8_SOLTU]	59.0739	9.45166	6.97	1	0.834316	1.00531	1.16244	0.902799	0.976216	0.971632	1.16329	0.906032	1.14026	1.0453	0.495844
K7XKN6	Cytochrome c OS=Solanum tuberosum PE=3 SV=1 - [K7XKN6_SOLTU]	5.94113	9.36377	15.38	1	1.01465	1.17152	0.874706	0.829985	0.972716	1.25569	0.823918	1.07965	1.07232	1.05789	0.496466
P55311	Catalase OS=Solanum melongena PE=2 SV=1 - [CATA_SOLME]	787.498	7.40088	8.94	11	1.08427	0.957113	0.944735	1.14447	1.03265	1.0978	0.945164	0.988897	0.915866	0.986932	0.4967
M1B8J9	Uncharacterized protein OS=Solanum tuberosum GN=PGSC0003DMG400015330 PE=4 SV=1 - [M1B8J9_SOLTU]	16.7813	6.3667	6.08	1	1.07147	1.06378	0.909187	1.05546	1.02497	1.06503	0.969663	1.01681	0.894865	0.986593	0.49672
K4CNS6	Uncharacterized protein OS=Solanum lycopersicum GN=Solyc08g079180.2 PE=3 SV=1 - [K4CNS6_SOLLC]	52.6522	8.86572	24.79	1	0.990624	1.03582	0.972371	1.08627	1.02127	1.06177	0.977442	0.984519	0.963836	0.996892	0.496765
K4B350	Uncharacterized protein OS=Solanum lycopersicum GN=Solyc01g108340.2 PE=4 SV=1 - [K4B350_SOLLC]	19.6659	7.00537	11.11	1	0.950882	1.14272	0.975269	1.00861	1.01937	0.933895	0.939273	0.976726	1.07223	0.98053	0.496775
Q38HV8	POM30-like protein OS=Solanum tuberosum PE=2 SV=1 - [Q38HV8_SOLTU]	29.2774	8.83643	9.09	1	0.944861	0.990295	1.06722	0.979432	0.995451	1.01755	1.0264	0.964012	1.07222	1.02005	0.497713
M1BCC6	Uncharacterized protein OS=Solanum tuberosum GN=PGSC0003DMG400016293 PE=4 SV=1 - [M1BCC6_SOLTU]	45.3851	7.95752	2.5	1	1.12492	0.817986	1.01663	1.18492	1.03611	0.860011	1.03266	1.06593	0.910012	0.967154	0.497885
Q9FVN0	Ammonium transporter 1 member 3 OS=Solanum lycopersicum GN=AMT1-3 PE=2 SV=1 - [AMT13_SOLLC]	36.5967	6.40479	2.65	1	0.974046	0.922509	0.966181	1.09122	0.98849	1.13428	0.952504	1.07219	0.960162	1.02979	0.497974
K4CL74	Uncharacterized protein OS=Solanum lycopersicum GN=Solyc08g062910.2 PE=4 SV=1 - [K4CL74_SOLLC]	85.942	5.73193	18.7	10	0.973014	0.995058	0.963409	1.04755	0.994757	1.07232	0.962437	0.999353	1.03166	1.01644	0.498236
Q40522	Ras-related protein Rab11D OS=Nicotiana tabacum GN=RAB11D PE=2 SV=1 - [RB11D_TOBAC]	92.3345	5.41455	2.46	1	1.03344	0.91167	1.08276	0.90517	0.98326	1.04871	1.22064	1.05122	0.862468	1.04576	0.498249
Q40891	Ribulose bisphosphate carboxylase small chain (Fragment) OS=Petunia hybrida PE=2 SV=1 - [Q40891_PETHY]	12.6833	5.45264	38.68	1	1.10919	0.938326	0.907399	1.18435	1.03482	1.01142	0.891369	1.1223	0.853483	0.969644	0.498358
M1BK12	Uncharacterized protein OS=Solanum tuberosum GN=PGSC0003DMG400018258 PE=4 SV=1 - [M1BK12_SOLTU]	7.92288	9.83252	16.9	1	0.963395	0.8637	1.06745	1.0499	0.986112	1.12587	1.11937	0.850655	1.0808	1.04418	0.499365
K4D8S6	Uncharacterized protein OS=Solanum lycopersicum GN=Solyc11g051160.1 PE=4 SV=1 - [K4D8S6_SOLLC]	65.6543	4.70361	8.49	2	1.05837	1.0488	0.953727	1.02551	1.0216	0.978442	0.840151	1.05721	1.04737	0.980793	0.499387
M0ZSD6	Uncharacterized protein OS=Solanum tuberosum GN=PGSC0003DMG402002721 PE=3 SV=1 - [M0ZSD6_SOLTU]	47.8154	5.80811	31.98	5	1.01149	0.974781	1.07513	1.0276	1.02225	0.959938	1.05628	0.999945	0.989735	1.00147	0.500114
M1C184	Uncharacterized protein OS=Solanum tuberosum GN=PGSC0003DMG400022342 PE=3 SV=1 - [M1C184_SOLTU]	32.1548	5.2876	9.33	1	1.0077	1.11367	0.761796	0.997243	0.970102	1.05234	0.887112	1.16156	1.04825	1.03732	0.500281
B3F8H5	Mevalonate diphosphate decarboxylase (Fragment) OS=Nicotiana langsdorffii x Nicotiana sanderae PE=1 SV=1 - [B3F8H5_NICLS]	44.6917	6.62451	8.13	3	1.0616	0.904343	1.01984	0.847656	0.958359	0.934352	1.14714	0.945723	1.00608	1.00833	0.500331
M1B9H1	Uncharacterized protein OS=Solanum tuberosum GN=PGSC0003DMG400015546 PE=3 SV=1 - [M1B9H1_SOLTU]	115.993	5.47803	2.73	3	1.01528	1.06407	0.932109	1.03425	1.01143	1.00275	0.953567	0.993843	1.00476	0.98873	0.500449
M1A422	Uncharacterized protein OS=Solanum tuberosum GN=PGSC0003DMG400005627 PE=4 SV=1 - [M1A422_SOLTU]	17.4398	8.96826	7.55	1	1.00563	1.04595	0.840885	1.25448	1.03674	0.959509	0.996061	0.828062	1.07449	0.964531	0.50056
M1D1G0	Uncharacterized protein OS=Solanum tuberosum GN=PGSC0003DMG400030834 PE=3 SV=1 - [M1D1G0_SOLTU]	32.6426	6.80029	8.39	3	1.07089	0.963332	1.01183	0.992315	1.00959	0.912802	1.02091	1.08369	0.854196	0.967899	0.500818
M1D093	Uncharacterized protein OS=Solanum tuberosum GN=PGSC0003DMG400030558 PE=4 SV=1 - [M1D093_SOLTU]	76.496	5.93506	1.46	1	0.94553	0.953234	1.09597	0.966801	0.990383	0.955004	1.0844	0.993749	1.06149	1.02366	0.500872
M1CAU6	Uncharacterized protein OS=Solanum tuberosum GN=PGSC0003DMG400024719 PE=4 SV=1 - [M1CAU6_SOLTU]	14.0133	9.45166	18.4	1	0.952191	1.10274	1.02255	1.01448	1.02299	1.04002	0.98021	0.941367	1.02125	0.995711	0.501672
M1CIP8	Uncharacterized protein OS=Solanum tuberosum GN=PGSC0003DMG400026534 PE=4 SV=1 - [M1CIP8_SOLTU]	74.9334	4.84326	1.23	1	0.98452	1.00953	0.993554	1.09219	1.01995	1.06041	0.983863	0.980633	0.960499	0.996351	0.501778
Q9FEW9	12-oxophytodienoate reductase 3 OS=Solanum lycopersicum GN=OPR3 PE=1 SV=1 - [OPR3_SOLLC]	43.4932	8.36768	4.55	2	0.984429	0.938829	1.08151	1.0874	1.02304	1.08787	0.921057	0.979332	0.957239	0.986376	0.501831
M1B7Y1	Uncharacterized protein OS=Solanum tuberosum GN=PGSC0003DMG400015165 PE=4 SV=1 - [M1B7Y1_SOLTU]	34.0606	6.16357	26.81	9	1.07357	0.993381	0.922849	1.06755	1.01434	0.948096	0.93791	1.08041	0.951079	0.979373	0.50266
K4BF34	Uncharacterized protein OS=Solanum lycopersicum GN=Solyc03g025610.1 PE=4 SV=1 - [K4BF34_SOLLC]	44.3154	5.42725	2.15	1	0.994769	1.06515	0.895846	1.0353	0.997766	1.06762	1.01153	1.00536	1.02317	1.02692	0.502828
Q84XQ4	NtPRp27-like protein OS=Solanum tuberosum PE=2 SV=1 - [Q84XQ4_SOLTU]	5.27262	8.83643	19.57	1	0.95694	1.05144	0.89208	1.03975	0.985051	1.14175	0.919587	1.06296	0.989445	1.02844	0.50317
M1AE01	Uncharacterized protein OS=Solanum tuberosum GN=PGSC0003DMG400008026 PE=4 SV=1 - [M1AE01_SOLTU]	34.6996	6.80029	7.05	3	1.0232	1.0633	0.973584	1.00652	1.01665	0.885328	1.05873	0.882483	1.07432	0.975216	0.503218
M1BJQ9	Elongation factor Tu OS=Solanum tuberosum GN=PGSC0003DMG400018190 PE=3 SV=1 - [M1BJQ9_SOLTU]	51.8498	6.55127	26.62	1	0.959817	0.913823	1.15391	0.968459	0.999002	1.11978	1.1728	0.964116	0.956328	1.05326	0.503527
M0ZGK0	Uncharacterized protein OS=Solanum tuberosum GN=PGSC0003DMG401000117 PE=4 SV=1 - [M0ZGK0_SOLTU]	109.558	5.73193	1.64	1	0.998333	0.983144	0.996982	0.987254	0.991428	1.03444	1.11973	0.979154	0.94716	1.02012	0.503745
Q2HXK9	Respiratory burst oxidase homolog protein D OS=Solanum tuberosum GN=RBOHD PE=1 SV=2 - [RBOHD_SOLTU]	276.377	8.39697	5.9	1	1.11489	0.924954	1.10596	0.972875	1.02967	0.717933	0.945722	1.1266	1.03879	0.95726	0.503981
M1CWV3	Uncharacterized protein OS=Solanum tuberosum GN=PGSC0003DMG400029743 PE=4 SV=1 - [M1CWV3_SOLTU]	22.2203	8.1626	8.78	2	1.00141	1.05111	0.861396	0.991084	0.976249	1.10178	0.900674	1.11594	0.973768	1.02304	0.504913
G0T511	1-hydroxy-2-methyl-butenyl 4-diphosphate reductase OS=Nicotiana benthamiana GN=IspH1 PE=2 SV=1 - [G0T511_NICBE]	51.7272	5.70654	8.89	2	1.02905	0.964551	0.899778	1.21175	1.02628	0.949278	0.883403	1.05044	1.00187	0.971249	0.505208
Q40381	Ribonuclease S-7 OS=Nicotiana alata PE=1 SV=1 - [RNS7_NICAL]	332.348	5.13525	4.05	7	1.01282	1.026	0.997632	1.03152	1.01699	1.06593	0.98624	1.00796	0.908049	0.992044	0.505904
M1CSY7	Uncharacterized protein OS=Solanum tuberosum GN=PGSC0003DMG400028753 PE=3 SV=1 - [M1CSY7_SOLTU]	91.3973	6.65381	3.69	3	0.981439	1.02608	0.921976	0.998994	0.982123	0.968735	0.990071	1.03937	1.0062	1.00109	0.506177
I3NT09	Photosystem II CP47 chlorophyll apoprotein (Fragment) OS=Petunia axillaris GN=psbB PE=3 SV=1 - [I3NT09_9SOLA]	55.4291	6.771	27.04	11	1.01594	0.861278	0.925529	1.10629	0.977261	1.01605	0.94978	1.10033	1.01992	1.02152	0.506484
M1AC63	Uncharacterized protein OS=Solanum tuberosum GN=PGSC0003DMG400007537 PE=3 SV=1 - [M1AC63_SOLTU]	59.9837	7.31299	10.43	1	0.961878	1.02309	0.956935	1.1302	1.01803	0.990566	0.908361	0.978803	1.05243	0.982541	0.506558
M1CV01	Uncharacterized protein OS=Solanum tuberosum GN=PGSC0003DMG400029301 PE=4 SV=1 - [M1CV01_SOLTU]	67.3509	5.78271	5.35	2	0.973633	1.10317	0.969543	1.00403	1.01259	1.03735	0.999165	0.995452	0.896023	0.981997	0.50705
M1B457	Uncharacterized protein OS=Solanum tuberosum GN=PGSC0003DMG400014172 PE=4 SV=1 - [M1B457_SOLTU]	26.0559	5.10986	4.87	1	1.07366	1.09574	0.986605	0.928352	1.02109	1.03767	0.918966	1.03929	0.948153	0.98602	0.507628
M1D130	Uncharacterized protein OS=Solanum tuberosum GN=PGSC0003DMG400030738 PE=3 SV=1 - [M1D130_SOLTU]	32.3807	8.00146	7.07	2	1.09257	1.02311	0.995018	1.01625	1.03174	1.1077	0.913646	1.06376	0.856469	0.985395	0.507975
M1CNC4	Uncharacterized protein OS=Solanum tuberosum GN=PGSC0003DMG400027686 PE=4 SV=1 - [M1CNC4_SOLTU]	17.3439	8.36768	8.92	1	1.01996	0.994815	0.999796	0.915027	0.9824	1.28023	1.10161	1.05213	0.797978	1.05799	0.508355
K4CXN5	Uncharacterized protein OS=Solanum lycopersicum GN=Solyc10g007050.2 PE=4 SV=1 - [K4CXN5_SOLLC]	39.7144	6.45557	3.3	1	1.00981	0.929491	1.00937	1.00805	0.989178	0.940227	1.0867	1.04338	0.99274	1.01576	0.508639
M1BY26	Uncharacterized protein OS=Solanum tuberosum GN=PGSC0003DMG400021556 PE=4 SV=1 - [M1BY26_SOLTU]	89.7436	5.2876	18.46	4	0.981932	1.05897	1.10019	0.985	1.03152	0.992414	1.10478	0.894028	0.987776	0.994749	0.509243
M1C7L3	Uncharacterized protein OS=Solanum tuberosum GN=PGSC0003DMG400023934 PE=4 SV=1 - [M1C7L3_SOLTU]	26.3287	7.48877	5.19	1	0.915963	1.0041	1.24108	0.995673	1.0392	0.977696	1.03724	0.904357	1.01751	0.984199	0.509384
M4SKS4	Phosphoglycerate kinase (Fragment) OS=Atropa belladonna GN=PGK PE=2 SV=1 - [M4SKS4_ATRBE]	38.6054	5.98584	32.23	3	1.00555	1.0023	1.12984	0.94741	1.02128	0.941182	0.977046	0.997853	1.04335	0.989859	0.509886
M1AQG0	Uncharacterized protein OS=Solanum tuberosum GN=PGSC0003DMG400010776 PE=4 SV=1 - [M1AQG0_SOLTU]	24.6249	5.87158	10.96	2	0.974879	0.853887	0.991824	1.15896	0.994888	1.05294	1.13141	0.957067	1.04348	1.04622	0.510129
M1DPA6	Elongation factor Tu OS=Solanum tuberosum GN=PGSC0003DMG400041767 PE=3 SV=1 - [M1DPA6_SOLTU]	45.3476	7.28369	24.22	3	0.996679	1.06408	0.950342	1.00805	1.00479	1.00773	0.881289	1.03077	0.9854	0.976297	0.510272
K4BM70	Uncharacterized protein OS=Solanum lycopersicum GN=Solyc03g119210.1 PE=4 SV=1 - [K4BM70_SOLLC]	9.87325	9.48096	9.68	1	1.01431	1.02743	0.913434	0.98233	0.984376	0.943953	0.928529	1.0912	1.14387	1.02689	0.510351
K4CH48	Ubiquitin carboxyl-terminal hydrolase OS=Solanum lycopersicum GN=Solyc07g063650.2 PE=3 SV=1 - [K4CH48_SOLLC]	88.864	5.05908	3	2	0.990815	0.954308	1.28465	0.960075	1.04746	1.04351	1.09736	0.946823	0.821707	0.977351	0.510801
M0ZZF5	Uncharacterized protein OS=Solanum tuberosum GN=PGSC0003DMG400004442 PE=4 SV=1 - [M0ZZF5_SOLTU]	5.25491	6.30322	16.67	1	0.989186	1.10127	0.881272	0.978642	0.987592	1.0749	1.0076	1.03013	0.979307	1.02299	0.511281
K4CVU1	Uncharacterized protein OS=Solanum lycopersicum GN=Solyc09g083150.2 PE=4 SV=1 - [K4CVU1_SOLLC]	28.4718	9.37842	10.28	2	1.01813	1.03953	1.11479	0.954847	1.03182	1.09967	1.08476	0.924833	0.784353	0.973405	0.511378
M1CDG7	Uncharacterized protein OS=Solanum tuberosum GN=PGSC0003DMG400025319 PE=4 SV=1 - [M1CDG7_SOLTU]	24.464	5.88428	5.24	1	1.04267	0.913495	1.25754	1.00126	1.05374	0.954449	0.953434	1.0096	1.07138	0.997216	0.511386
M1ARY1	Uncharacterized protein OS=Solanum tuberosum GN=PGSC0003DMG400011141 PE=4 SV=1 - [M1ARY1_SOLTU]	10.3003	9.5249	9.78	1	0.975139	0.899241	1.1574	0.814333	0.96153	0.81929	1.27503	0.95047	1.15268	1.04937	0.512132
Q9XGI7	Nicotianamine synthase OS=Solanum lycopersicum GN=CHLN PE=2 SV=1 - [NAS_SOLLC]	546.061	5.35107	1.08	1	1.04528	1.01367	0.944093	1.06639	1.01736	0.875765	0.905308	1.1112	1.00702	0.974824	0.512414
M1AKM1	Uncharacterized protein OS=Solanum tuberosum GN=PGSC0003DMG400009584 PE=4 SV=1 - [M1AKM1_SOLTU]	16.7473	5.75732	7.33	1	1.13574	1.08037	1.04187	0.954056	1.05301	1.18463	1.00908	1.00048	0.72141	0.978901	0.512598
K4BCY8	Uncharacterized protein OS=Solanum lycopersicum GN=Solyc02g091900.2 PE=4 SV=1 - [K4BCY8_SOLLC]	38.1585	8.20654	4.08	1	1.06112	1.06043	1.0296	1.01624	1.04185	1.12223	1.02628	1.02504	0.766677	0.985058	0.51269
K4BL78	Uncharacterized protein OS=Solanum lycopersicum GN=Solyc03g115760.2 PE=4 SV=1 - [K4BL78_SOLLC]	13.3689	6.72705	9.17	1	0.995974	1.03979	0.992128	1.07823	1.02653	1.08551	0.840104	0.954547	1.05545	0.983903	0.512856
M1D593	Uncharacterized protein OS=Solanum tuberosum GN=PGSC0003DMG400032152 PE=4 SV=1 - [M1D593_SOLTU]	41.8217	8.66064	13.78	2	0.96032	1.02766	1.01765	1.04054	1.01154	0.942883	0.982023	0.975038	1.06058	0.990131	0.513302
K4CQI3	Uncharacterized protein OS=Solanum lycopersicum GN=Solyc09g007940.2 PE=4 SV=1 - [K4CQI3_SOLLC]	24.0139	5.63037	37.27	1	0.905538	0.859421	0.906068	1.16938	0.960101	0.995423	0.827228	1.22555	1.0978	1.0365	0.513534
K4DA21	Uncharacterized protein OS=Solanum lycopersicum GN=Solyc11g068640.1 PE=4 SV=1 - [K4DA21_SOLLC]	129.341	5.64307	0.95	1	1.02527	1.07236	0.898112	1.07219	1.01698	0.827293	0.971684	1.03884	1.04841	0.971557	0.515346
M1CQ57	Uncharacterized protein OS=Solanum tuberosum GN=PGSC0003DMG400028162 PE=3 SV=1 - [M1CQ57_SOLTU]	6.67743	8.67529	23.33	2	0.897453	0.866356	1.1947	0.963421	0.980484	1.03491	1.13995	1.04092	0.943503	1.03982	0.515768
Q9XE59	Phosphoglycerate mutase OS=Solanum tuberosum GN=pgam PE=1 SV=1 - [Q9XE59_SOLTU]	61.2192	5.68115	9.12	2	0.941838	0.98696	0.964043	0.978672	0.967878	0.96015	1.1692	0.914745	0.992062	1.00904	0.516582
M1BTT7	Uncharacterized protein OS=Solanum tuberosum GN=PGSC0003DMG400020446 PE=4 SV=1 - [M1BTT7_SOLTU]	63.7344	6.56592	12.65	2	0.919107	0.998555	0.92359	1.11947	0.990179	0.983979	1.01705	1.05255	1.04861	1.02555	0.517005
M1BG20	Uncharacterized protein OS=Solanum tuberosum GN=PGSC0003DMG400017221 PE=4 SV=1 - [M1BG20_SOLTU]	70.4403	6.53662	5.02	3	1.09548	0.995595	1.01827	0.950486	1.01496	0.994336	1.04099	0.973185	0.952133	0.99016	0.518846
K4CGG6	Uncharacterized protein OS=Solanum lycopersicum GN=Solyc07g056330.2 PE=4 SV=1 - [K4CGG6_SOLLC]	27.0299	7.78174	5	1	0.992139	1.00197	1.04682	0.91493	0.988965	0.97506	1.06762	0.942256	1.09736	1.02057	0.519146
M0ZQZ0	Uncharacterized protein OS=Solanum tuberosum GN=PGSC0003DMG400002408 PE=4 SV=1 - [M0ZQZ0_SOLTU]	36.5129	6.45557	18.71	4	0.926365	0.95975	0.914075	1.10772	0.976978	1.03214	0.963196	0.978046	1.07849	1.01297	0.519353
D0EWF3	Putative inosine monophosphate cyclohydrolase OS=Solanum lycopersicum GN=IMPCHase PE=2 SV=1 - [D0EWF3_SOLLC]	5.91415	8.6167	15	1	0.978995	1.08805	0.981696	1.05395	1.02567	1.07525	1.01414	0.99358	0.889905	0.993219	0.519537
M1BQ55	Uncharacterized protein OS=Solanum tuberosum GN=PGSC0003DMG400019568 PE=4 SV=1 - [M1BQ55_SOLTU]	28.6688	6.96143	3.03	1	1.02809	1.13032	0.907801	1.0035	1.01743	0.977808	0.941293	1.00211	1.01132	0.983133	0.519997
M1A5U2	Uncharacterized protein OS=Solanum tuberosum GN=PGSC0003DMG400005972 PE=4 SV=1 - [M1A5U2_SOLTU]	25.7655	7.13721	4.22	1	0.951662	0.870934	1.12978	0.979657	0.983007	0.995494	1.2063	0.887108	1.07999	1.04222	0.520099
M1BPU5	Uncharacterized protein OS=Solanum tuberosum GN=PGSC0003DMG400019472 PE=4 SV=1 - [M1BPU5_SOLTU]	11.3637	4.70361	24.53	2	0.993043	1.05219	1.08215	0.926353	1.01343	0.897787	0.988664	1.02146	1.02219	0.982526	0.520367
M1C2Q1	Uncharacterized protein OS=Solanum tuberosum GN=PGSC0003DMG400022707 PE=4 SV=1 - [M1C2Q1_SOLTU]	101.684	8.82178	10.23	2	0.950108	1.06405	0.880871	0.997809	0.97321	1.0506	0.910931	1.03671	1.03251	1.00769	0.52083
M1BQH0	Uncharacterized protein OS=Solanum tuberosum GN=PGSC0003DMG400019638 PE=4 SV=1 - [M1BQH0_SOLTU]	35.9408	5.59229	2.52	1	1.11531	0.950261	0.80645	1.02071	0.973184	0.963955	1.03134	0.995736	1.10168	1.02318	0.521074
K4DBU5	Uncharacterized protein OS=Solanum lycopersicum GN=Solyc12g008570.1 PE=3 SV=1 - [K4DBU5_SOLLC]	73.0976	7.28369	3.24	2	0.877789	0.983111	1.06223	1.02897	0.988024	0.944392	1.10868	1.00697	1.03517	1.0238	0.522891
K4BMF0	Uncharacterized protein OS=Solanum lycopersicum GN=Solyc03g120010.2 PE=4 SV=1 - [K4BMF0_SOLLC]	19.0186	4.95752	7.39	1	1.08902	1.03941	1.14841	0.905453	1.04557	0.927448	1.22837	0.879216	0.875493	0.977631	0.523239
K4D202	Uncharacterized protein OS=Solanum lycopersicum GN=Solyc10g076600.1 PE=3 SV=1 - [K4D202_SOLLC]	46.1967	7.47412	2.38	1	0.87539	1.04455	0.894438	1.01903	0.95835	0.770122	1.12976	1.024	1.19549	1.02984	0.523533
K4BB89	Uncharacterized protein OS=Solanum lycopersicum GN=Solyc02g085780.2 PE=4 SV=1 - [K4BB89_SOLLC]	22.4811	7.06396	6.67	1	0.882168	0.829777	1.24821	0.944374	0.976132	0.988725	1.23159	0.910221	1.09123	1.05544	0.523789
M1AQH0	Uncharacterized protein OS=Solanum tuberosum GN=PGSC0003DMG400010788 PE=3 SV=1 - [M1AQH0_SOLTU]	35.731	6.25244	18.52	2	1.02803	1.02493	1.08043	0.962933	1.02408	0.929651	1.15628	0.938035	0.891815	0.978946	0.523799
K4B206	Uncharacterized protein OS=Solanum lycopersicum GN=Solyc01g104310.2 PE=4 SV=1 - [K4B206_SOLLC]	44.7773	5.87158	2.18	1	1.04311	1.07718	0.907189	0.908011	0.983872	0.964672	1.11163	0.979592	1.03066	1.02164	0.524028
M1A997	Uncharacterized protein OS=Solanum tuberosum GN=PGSC0003DMG400006856 PE=4 SV=1 - [M1A997_SOLTU]	39.6638	8.83643	7.63	2	1.00719	0.989879	0.943509	1.06029	1.00022	0.989986	0.979179	1.04875	1.07211	1.02251	0.524617
K4C3F2	Uncharacterized protein OS=Solanum lycopersicum GN=Solyc06g007710.2 PE=4 SV=1 - [K4C3F2_SOLLC]	34.5893	7.1958	5.41	1	1.08109	0.948529	1.04414	1.011	1.02119	1.07453	0.955724	1.00947	0.929943	0.992417	0.525016
K4BNY7	Uncharacterized protein OS=Solanum lycopersicum GN=Solyc04g008310.1 PE=3 SV=1 - [K4BNY7_SOLLC]	52.8327	5.35107	7.02	1	0.943106	1.03268	1.11268	1.05111	1.03489	0.878416	1.09875	0.991922	1.01568	0.996191	0.526788
M0ZHA3	Uncharacterized protein OS=Solanum tuberosum GN=PGSC0003DMG400000285 PE=4 SV=1 - [M0ZHA3_SOLTU]	14.0642	8.67529	5.74	1	1.0083	0.942301	0.985305	0.998003	0.983476	0.98645	1.25402	0.941479	0.962765	1.03618	0.527492
B1Q487	Putative 26S proteasome subunit RPN2a OS=Capsicum chinense PE=2 SV=1 - [B1Q487_CAPCH]	108.755	5.36377	6.68	1	1.03456	0.895416	1.14138	0.991169	1.01563	0.954561	1.09561	0.881274	0.948577	0.970005	0.527855
M0ZT74	Uncharacterized protein OS=Solanum tuberosum GN=PGSC0003DMG400002921 PE=4 SV=1 - [M0ZT74_SOLTU]	48.7452	7.10791	9.77	3	0.951744	0.841903	0.987681	1.13507	0.9791	1.04803	0.965358	1.06162	1.0196	1.02365	0.528321
M1CWH9	Uncharacterized protein OS=Solanum tuberosum GN=PGSC0003DMG400029659 PE=3 SV=1 - [M1CWH9_SOLTU]	16.5772	10.1987	19.18	2	0.972527	0.971425	0.95258	1.04241	0.984735	1.01589	0.9385	1.1177	0.98383	1.01398	0.528556
M0ZGL3	Uncharacterized protein OS=Solanum tuberosum GN=PGSC0003DMG400000125 PE=4 SV=1 - [M0ZGL3_SOLTU]	23.5526	8.96826	3.76	1	0.925788	0.837968	1.07693	1.06215	0.975711	0.893351	1.0041	1.09374	1.11597	1.02679	0.528681
K4CIR4	Uncharacterized protein OS=Solanum lycopersicum GN=Solyc08g007770.2 PE=4 SV=1 - [K4CIR4_SOLLC]	27.7131	8.60205	8.5	1	1.16615	0.856101	1.27512	0.920886	1.05457	1.01105	1.12053	0.977965	0.781153	0.972674	0.529374
Q42945	Caffeoyl-CoA O-methyltransferase 6 OS=Nicotiana tabacum GN=CCOAOMT6 PE=2 SV=1 - [CAMT6_TOBAC]	27.7813	5.49072	8.1	1	0.94429	0.967929	0.947309	1.08012	0.984912	0.926359	1.00248	1.05994	1.07499	1.01594	0.530188
K4BPX1	Uncharacterized protein OS=Solanum lycopersicum GN=Solyc04g014680.2 PE=4 SV=1 - [K4BPX1_SOLLC]	19.9308	9.31982	8.33	1	1.14436	1.03092	0.949486	0.950448	1.0188	0.868565	1.04797	0.968621	1.02726	0.978103	0.530418
M1CWN2	Uncharacterized protein OS=Solanum tuberosum GN=PGSC0003DMG400029704 PE=3 SV=1 - [M1CWN2_SOLTU]	33.3651	8.88037	22.62	4	0.996276	0.993073	0.979018	0.990454	0.989705	0.959586	0.991447	1.09339	0.996474	1.01022	0.530587
K4DEF3	Uncharacterized protein OS=Solanum lycopersicum GN=Solyc12g037980.1 PE=3 SV=1 - [K4DEF3_SOLLC]	32.9843	4.81787	3.67	1	1.03096	0.974249	1.27146	0.951132	1.05695	1.07627	1.15933	0.893208	0.808215	0.984256	0.530614
M1BC62	Uncharacterized protein OS=Solanum tuberosum GN=PGSC0003DMG402016246 PE=3 SV=1 - [M1BC62_SOLTU]	58.228	8.52881	3.19	2	0.964464	1.15642	1.11653	0.896076	1.03337	1.12785	0.872546	1.02896	0.869372	0.974682	0.531022
K4CPP0	Uncharacterized protein OS=Solanum lycopersicum GN=Solyc08g082440.2 PE=3 SV=1 - [K4CPP0_SOLLC]	25.2418	6.53662	9.09	2	1.06774	1.03334	0.868671	1.13746	1.0268	0.969006	0.733848	1.0425	1.09864	0.960998	0.531166
M0ZS04	Uncharacterized protein OS=Solanum tuberosum GN=PGSC0003DMG400002639 PE=4 SV=1 - [M0ZS04_SOLTU]	102.597	7.40088	2.9	1	0.873882	0.861733	1.18765	0.936953	0.965055	0.848488	1.2527	0.913631	1.17733	1.04804	0.531196
M0ZRT0	Uncharacterized protein OS=Solanum tuberosum GN=PGSC0003DMG400002591 PE=4 SV=1 - [M0ZRT0_SOLTU]	6.9815	5.96045	25	1	1.03791	1.0155	0.930268	0.988589	0.993067	1.01168	0.997183	0.97716	1.06631	1.01308	0.531383
K4Q164	Tm-1 protein OS=Solanum habrochaites GN=Tm-1 PE=2 SV=1 - [K4Q164_SOLHA]	6.7142	4.58936	16.67	1	0.914341	1.12638	0.891171	0.994301	0.981549	0.997014	0.987638	1.09924	1.00292	1.0217	0.531408
K4AT93	Uncharacterized protein OS=Solanum lycopersicum GN=Solyc01g008970.2 PE=4 SV=1 - [K4AT93_SOLLC]	41.7802	4.70361	1.86	1	0.968859	1.06071	0.947476	0.994943	0.992998	1.06986	0.957658	1.04561	0.992664	1.01645	0.531429
M1CII0	Uncharacterized protein OS=Solanum tuberosum GN=PGSC0003DMG400026502 PE=3 SV=1 - [M1CII0_SOLTU]	68.584	5.45264	36.92	10	1.02654	0.961432	1.10565	0.985872	1.01987	1.00579	1.04781	0.972774	0.951678	0.994513	0.532032
C6GMF6	5-epi-aristolochene synthase (Fragment) OS=Nicotiana plumbaginifolia GN=eas PE=2 SV=1 - [C6GMF6_NICPL]	26.6366	5.2876	4.82	1	0.917336	1.02323	0.976592	1.0172	0.983591	0.966383	1.14165	0.888278	1.11662	1.02823	0.532439
K4B3Z0	Uncharacterized protein OS=Solanum lycopersicum GN=Solyc01g111280.2 PE=4 SV=1 - [K4B3Z0_SOLLC]	17.3026	6.85889	5.26	1	0.957855	1.07916	1.22123	0.896602	1.03871	1.06525	0.950529	0.965063	0.964428	0.986317	0.532547
M1CN12	Uncharacterized protein OS=Solanum tuberosum GN=PGSC0003DMG400027595 PE=4 SV=1 - [M1CN12_SOLTU]	34.0767	7.38623	14.1	4	1.02902	0.967132	1.18688	0.955388	1.0346	1.00273	1.08119	0.901143	0.980408	0.991367	0.532754
M1AUE9	Uncharacterized protein OS=Solanum tuberosum GN=PGSC0003DMG400011702 PE=3 SV=1 - [M1AUE9_SOLTU]	11.2788	4.53857	21.62	1	1.01717	1.09672	1.15354	0.933237	1.05017	1.05224	1.2019	0.890727	0.770262	0.978782	0.532805
D2IJR1	Putative uncharacterized protein (Fragment) OS=Lycium andersonii PE=4 SV=1 - [D2IJR1_9SOLA]	22.3642	8.86572	6.42	1	0.955149	0.903967	1.08321	1.02318	0.991376	1.0286	1.09889	0.926167	1.05366	1.02683	0.532819
J7FYT8	RNA-binding glycine-rich protein OS=Nicotiana glauca GN=RGP-3 PE=4 SV=1 - [J7FYT8_NICGL]	12.9874	5.5542	10.83	1	1.03197	1.03848	0.968188	0.906852	0.986372	1.09867	0.963177	0.939649	1.07845	1.01999	0.53282
O82625	Expansin OS=Solanum lycopersicum GN=LeEXP2 PE=2 SV=1 - [O82625_SOLLC]	13.1366	10.9604	7.5	1	1.12491	1.00831	1.04042	0.968361	1.0355	1.06727	1.0822	0.993216	0.806186	0.987216	0.532867
M1C7H0	Uncharacterized protein OS=Solanum tuberosum GN=PGSC0003DMG400023906 PE=4 SV=1 - [M1C7H0_SOLTU]	40.4392	8.08936	2.29	1	0.911743	0.908784	0.936168	1.15284	0.977383	1.00076	0.930301	1.03116	1.14259	1.0262	0.533357
K4BS21	Uncharacterized protein OS=Solanum lycopersicum GN=Solyc04g050510.2 PE=4 SV=1 - [K4BS21_SOLLC]	141.274	6.99072	3.73	5	1.05933	0.99549	1.04204	1.04421	1.03527	0.911558	1.16264	0.957313	0.947547	0.994764	0.533421
K4C2R3	Uncharacterized protein OS=Solanum lycopersicum GN=Solyc05g055880.2 PE=4 SV=1 - [K4C2R3_SOLLC]	43.339	9.23193	4.58	2	0.922107	1.06593	0.89509	1.04577	0.982225	1.02124	0.893865	1.09641	1.08469	1.02405	0.533592
M1D6L8	Uncharacterized protein OS=Solanum tuberosum GN=PGSC0003DMG400033084 PE=3 SV=1 - [M1D6L8_SOLTU]	27.5831	6.96143	9.2	2	1.04176	0.97895	0.887884	1.13016	1.00969	1.01164	0.938293	0.994503	0.946178	0.972654	0.534212
K4B0B7	Uncharacterized protein OS=Solanum lycopersicum GN=Solyc01g097300.2 PE=4 SV=1 - [K4B0B7_SOLLC]	7.07278	5.17334	20	1	1.00935	0.948588	1.07683	1.04809	1.02072	0.99546	0.985315	0.937822	1.06411	0.995676	0.534919
K4AQ32	Uncharacterized protein OS=Solanum lycopersicum GN=Solyc00g009020.2 PE=4 SV=1 - [K4AQ32_SOLLC]	27.4359	8.66064	27.08	1	1.00341	0.970152	0.967978	1.02324	0.991195	1.06564	1.00387	1.0846	0.918881	1.01825	0.534956
K4BKV3	Uncharacterized protein OS=Solanum lycopersicum GN=Solyc03g114510.2 PE=4 SV=1 - [K4BKV3_SOLLC]	21.3327	8.27979	6.22	1	1.25698	0.819258	1.15391	0.941747	1.04297	1.00183	0.971126	0.919019	0.999515	0.972872	0.535014
K4ASC8	Uncharacterized protein OS=Solanum lycopersicum GN=ACI36 PE=3 SV=1 - [K4ASC8_SOLLC]	12.8047	9.68604	9.4	1	1.03713	1.04577	0.911373	1.03782	1.00802	0.898705	1.01857	1.04028	0.95507	0.978156	0.535858
Q307Z8	P0 ribosomal protein-like OS=Solanum tuberosum PE=2 SV=1 - [Q307Z8_SOLTU]	33.9168	5.23682	12.81	3	0.979519	1.09797	0.859513	1.01019	0.9868	1.04271	0.957701	1.02997	1.06314	1.02338	0.535954
M1CLH3	Uncharacterized protein OS=Solanum tuberosum GN=PGSC0003DMG400027205 PE=4 SV=1 - [M1CLH3_SOLTU]	11.9652	5.69385	12.26	1	1.0033	0.979093	0.925374	1.03906	0.986706	0.927475	1.00408	1.0656	1.05356	1.01268	0.536046
M1CA90	Uncharacterized protein OS=Solanum tuberosum GN=PGSC0003DMG400024582 PE=3 SV=1 - [M1CA90_SOLTU]	55.874	5.37646	5.74	3	0.977103	0.989264	0.989265	1.09062	1.01156	1.00397	0.85559	1.00831	1.04644	0.978577	0.53627
K4B2B1	Uncharacterized protein OS=Solanum lycopersicum GN=Solyc01g105410.2 PE=4 SV=1 - [K4B2B1_SOLLC]	31.837	8.95361	11.67	3	1.063	0.88859	0.92713	0.956151	0.958719	0.964406	0.847091	1.23209	1.03032	1.01848	0.536427
M1CMH0	Uncharacterized protein OS=Solanum tuberosum GN=PGSC0003DMG400027460 PE=4 SV=1 - [M1CMH0_SOLTU]	28.5309	6.21436	4.33	1	1.09043	1.02443	1.02403	0.946536	1.02136	1.07037	0.8801	1.05879	0.928433	0.984423	0.537014
Q3C2L6	Sorbitol related enzyme OS=Solanum lycopersicum GN=LeSDH PE=2 SV=1 - [Q3C2L6_SOLLC]	38.1014	6.29053	20.56	6	1.00158	1.03456	0.969342	1.01545	1.00523	1.00426	0.958219	1.02701	0.978248	0.991932	0.537855
M1BKI6	Uncharacterized protein OS=Solanum tuberosum GN=PGSC0003DMG400018374 PE=4 SV=1 - [M1BKI6_SOLTU]	29.6855	9.01221	3.38	1	0.899522	1.02981	0.881468	1.07154	0.970584	1.16091	0.798859	1.19167	1.00147	1.03823	0.538034
K4CN59	Uncharacterized protein OS=Solanum lycopersicum GN=Solyc08g076990.2 PE=4 SV=1 - [K4CN59_SOLLC]	48.1195	5.70654	10.27	4	0.994299	1.03394	1.08972	0.977292	1.02381	1.05514	1.04577	0.944525	0.947221	0.998165	0.538299
M1AYC6	Uncharacterized protein OS=Solanum tuberosum GN=PGSC0003DMG400012654 PE=4 SV=1 - [M1AYC6_SOLTU]	22.6693	4.60205	17.62	3	0.932362	1.06512	1.02368	0.94003	0.990297	0.976693	0.998922	1.01475	1.07167	1.01551	0.538457
M1AEP7	Uncharacterized protein OS=Solanum tuberosum GN=PGSC0003DMG400008191 PE=4 SV=1 - [M1AEP7_SOLTU]	99.2625	5.87158	4.57	4	0.971176	0.908029	1.21871	1.09135	1.04732	1.04422	1.02516	0.987726	0.935528	0.998159	0.538536
M1CVD3	60S ribosomal protein L13 OS=Solanum tuberosum GN=PGSC0003DMG400029381 PE=3 SV=1 - [M1CVD3_SOLTU]	23.485	11.0776	24.76	3	0.94717	0.973977	1.10902	0.922535	0.988175	1.0986	1.06009	1.00584	0.931823	1.02409	0.539448
M1CUV2	Uncharacterized protein OS=Solanum tuberosum GN=PGSC0003DMG400029275 PE=3 SV=1 - [M1CUV2_SOLTU]	31.4736	5.22412	3.41	1	1.01777	0.884905	1.01609	1.00129	0.980016	0.964566	1.29686	0.916045	0.989678	1.04179	0.540898
Q38M64	Putative uncharacterized protein OS=Solanum tuberosum PE=2 SV=1 - [Q38M64_SOLTU]	32.5112	9.33447	11.82	2	1.04358	0.938589	1.10097	0.974988	1.01453	0.838304	0.996844	0.9492	1.10225	0.97165	0.541074
K4I8Y4	Ribulose bisphosphate carboxylase small chain (Fragment) OS=Solanum melongena GN=RuBP PE=2 SV=1 - [K4I8Y4_SOLME]	10.6521	4.80518	13.48	1	0.996432	0.991996	1.26857	0.917609	1.04365	0.942826	1.06458	0.929707	1.01568	0.988198	0.542542
M1CQH5	Ubiquitin carboxyl-terminal hydrolase OS=Solanum tuberosum GN=PGSC0003DMG400028223 PE=3 SV=1 - [M1CQH5_SOLTU]	131.703	5.68115	4.99	5	1.01475	0.995686	1.06835	0.987874	1.01667	1.02072	1.01368	1.00336	0.97441	1.00304	0.542942
K4D3I2	Uncharacterized protein OS=Solanum lycopersicum GN=Solyc10g083960.1 PE=4 SV=1 - [K4D3I2_SOLLC]	55.3673	5.65576	2.01	1	1.13952	1.04023	0.882223	0.86054	0.980629	1.12169	0.992953	0.951246	1.05601	1.03047	0.543234
K4CWR9	Uncharacterized protein OS=Solanum lycopersicum GN=Solyc09g092430.2 PE=4 SV=1 - [K4CWR9_SOLLC]	53.9365	5.75732	5.52	2	0.993401	0.962775	0.932501	1.05999	0.987167	1.13653	0.954091	1.08312	0.925627	1.02484	0.543459
M1CZL3	Serine/threonine-protein phosphatase OS=Solanum tuberosum GN=PGSC0003DMG400030424 PE=3 SV=1 - [M1CZL3_SOLTU]	35.3475	5.09717	10.97	1	1.05098	0.902182	1.10128	0.904182	0.989658	1.07579	1.14508	0.905	1.01791	1.03594	0.543902
M1CVB6	Uncharacterized protein OS=Solanum tuberosum GN=PGSC0003DMG400029370 PE=4 SV=1 - [M1CVB6_SOLTU]	17.2407	6.52197	4.91	1	0.955383	1.10349	0.946307	1.06266	1.01696	0.853311	0.954916	1.09117	1.00525	0.976162	0.543917
O82702	V-type proton ATPase subunit G 1 OS=Nicotiana tabacum GN=VATG1 PE=1 SV=1 - [VATG1_TOBAC]	12.3393	6.31592	20.91	1	1.08378	1.13413	0.94714	0.914988	1.02001	0.971269	0.899178	0.959586	1.08197	0.978001	0.54481
K4D5Z6	Uncharacterized protein OS=Solanum lycopersicum GN=Solyc11g011910.1 PE=4 SV=1 - [K4D5Z6_SOLLC]	20.7954	6.52197	4.44	1	1.10223	1.14943	0.953026	0.975117	1.04495	1.1697	0.953293	1.05105	0.733358	0.976851	0.544955
M1BY78	Uncharacterized protein OS=Solanum tuberosum GN=PGSC0003DMG400021595 PE=4 SV=1 - [M1BY78_SOLTU]	34.8261	6.94678	3.36	1	0.997916	0.901383	0.949179	1.07276	0.98031	1.00453	0.880243	1.13506	1.07102	1.02271	0.545208
M1B4J2	Uncharacterized protein OS=Solanum tuberosum GN=PGSC0003DMG400014243 PE=4 SV=1 - [M1B4J2_SOLTU]	35.4642	7.06396	12.54	4	1.05586	0.915701	0.941154	1.01859	0.982828	1.00968	0.961798	1.06007	0.999585	1.00778	0.545306
K4CRJ3	Uncharacterized protein OS=Solanum lycopersicum GN=Solyc09g011670.2 PE=4 SV=1 - [K4CRJ3_SOLLC]	18.6926	6.69775	7.32	1	0.809574	1.06525	1.07014	0.963683	0.977161	1.01767	1.27933	0.904895	0.970135	1.04301	0.545453
Q6RH11	40S ribosomal protein S5 OS=Capsicum annuum GN=RpS5 PE=2 SV=1 - [Q6RH11_CAPAN]	23.4842	9.45166	39.15	9	1.00291	1.02163	0.99125	0.979888	0.99892	1.09524	1.084	0.971962	0.948563	1.02494	0.545547
K4BWM9	Uncharacterized protein OS=Solanum lycopersicum GN=Solyc05g007030.2 PE=4 SV=1 - [K4BWM9_SOLLC]	90.7806	5.31299	1.32	1	1.02062	1.00894	1.00202	1.01027	1.01046	0.980013	0.943116	1.00352	1.05248	0.994783	0.545567
K4CM08	Uncharacterized protein OS=Solanum lycopersicum GN=Solyc08g067840.2 PE=4 SV=1 - [K4CM08_SOLLC]	33.139	8.93896	4.07	1	0.966112	0.992799	1.05545	0.934322	0.987171	0.894204	1.07238	1.07215	1.03865	1.01935	0.545769
M1CJ43	Uncharacterized protein OS=Solanum tuberosum GN=PGSC0003DMG400026627 PE=4 SV=1 - [M1CJ43_SOLTU]	46.3734	6.48096	19.44	1	1.01514	0.999386	0.839022	1.29216	1.03643	1.02875	0.952271	1.0061	0.896121	0.97081	0.546134
M1CBR8	Uncharacterized protein OS=Solanum tuberosum GN=PGSC0003DMG400024913 PE=4 SV=1 - [M1CBR8_SOLTU]	57.982	5.71924	9.81	3	0.992941	0.912568	1.0228	1.12191	1.01256	0.924531	0.939811	0.959386	1.08246	0.976548	0.546714
M1CPK1	Uncharacterized protein OS=Solanum tuberosum GN=PGSC0003DMG400028009 PE=4 SV=1 - [M1CPK1_SOLTU]	19.2945	5.0083	10.56	2	1.07419	1.03585	1.02177	0.924767	1.01414	1.06241	0.889828	0.951312	1.02531	0.982215	0.546848
K4BP33	Uncharacterized protein OS=Solanum lycopersicum GN=Solyc04g008770.2 PE=4 SV=1 - [K4BP33_SOLLC]	16.8802	4.75439	7.19	1	1.02652	0.8929	1.12747	0.881288	0.982045	0.959786	1.14001	0.912119	1.12644	1.03459	0.54699
M1CQG4	Uncharacterized protein OS=Solanum tuberosum GN=PGSC0003DMG400028218 PE=4 SV=1 - [M1CQG4_SOLTU]	40.727	5.0083	4.56	2	1.00353	0.941327	0.903921	1.0988	0.986894	1.03731	0.968371	1.10126	0.975556	1.02062	0.547787
M1BAS6	Uncharacterized protein OS=Solanum tuberosum GN=PGSC0003DMG400015872 PE=4 SV=1 - [M1BAS6_SOLTU]	47.4023	8.66064	1.92	1	0.973213	1.04069	0.805825	1.06943	0.972289	0.913665	1.05048	1.14975	0.973987	1.02197	0.548143
K4CJL1	Uncharacterized protein OS=Solanum lycopersicum GN=Solyc08g021910.1 PE=4 SV=1 - [K4CJL1_SOLLC]	225.201	5.77002	0.68	1	1.01776	1.06171	0.955593	0.909987	0.986262	0.942046	1.04733	0.98361	1.09165	1.01616	0.549346
M1CTP3	Uncharacterized protein OS=Solanum tuberosum GN=PGSC0003DMG400028929 PE=4 SV=1 - [M1CTP3_SOLTU]	59.5008	5.66846	1.66	1	0.928768	1.03996	0.943429	1.02283	0.983747	0.942811	0.964945	1.02828	1.12562	1.01541	0.549427
K4C3U9	Pectinesterase OS=Solanum lycopersicum GN=Solyc06g009190.2 PE=3 SV=1 - [K4C3U9_SOLLC]	62.5097	8.85107	4.61	2	1.02874	0.950731	0.819214	1.04044	0.95978	0.887065	0.855736	1.12644	1.24649	1.02893	0.549825
M1BKE8	Uncharacterized protein OS=Solanum tuberosum GN=PGSC0003DMG400018351 PE=4 SV=1 - [M1BKE8_SOLTU]	31.34	8.06006	19.01	3	1.03301	0.965706	0.974917	1.09583	1.01737	1.03064	1.03213	0.95788	0.954183	0.993709	0.549953
K4CCK4	Uncharacterized protein OS=Solanum lycopersicum GN=Solyc07g017900.2 PE=4 SV=1 - [K4CCK4_SOLLC]	35.3872	6.7124	2.55	1	1.02253	1.07308	0.88327	1.08022	1.01478	0.920726	0.989412	0.976598	1.03905	0.981448	0.550407
M1D539	Uncharacterized protein OS=Solanum tuberosum GN=PGSC0003DMG400032131 PE=4 SV=1 - [M1D539_SOLTU]	35.9648	5.51611	2.29	1	0.984197	1.01579	1.0601	1.01079	1.01772	0.897295	1.02173	1.08884	0.94545	0.988328	0.550993
K4CAS6	Uncharacterized protein OS=Solanum lycopersicum GN=Solyc06g084210.2 PE=4 SV=1 - [K4CAS6_SOLLC]	115.054	7.50342	4.02	3	1.09753	0.975721	1.01419	0.837886	0.981332	0.916767	0.956087	0.946037	0.96029	0.944795	0.551523
M1AWX9	Uncharacterized protein OS=Solanum tuberosum GN=PGSC0003DMG400012336 PE=3 SV=1 - [M1AWX9_SOLTU]	34.2196	7.34229	3.81	1	0.85329	0.98668	1.10559	0.942765	0.97208	0.892264	0.999834	0.991306	1.22918	1.02815	0.551882
K4BMS6	Uncharacterized protein OS=Solanum lycopersicum GN=Solyc03g121270.2 PE=4 SV=1 - [K4BMS6_SOLLC]	42.4864	5.51611	3.12	1	0.965087	0.92652	1.32844	0.949969	1.0425	0.908175	0.982163	0.92103	1.08891	0.97507	0.551982
M1AEW6	Uncharacterized protein OS=Solanum tuberosum GN=PGSC0003DMG400008262 PE=4 SV=1 - [M1AEW6_SOLTU]	65.6157	7.10791	16.61	2	0.989126	1.08829	1.00716	1.02001	1.02615	1.11026	1.01656	0.952176	0.893346	0.993085	0.552169
M1CLM4	Uncharacterized protein OS=Solanum tuberosum GN=PGSC0003DMG400027240 PE=4 SV=1 - [M1CLM4_SOLTU]	38.3816	9.34912	2.9	1	1.10892	1.11516	1.06274	0.865985	1.0382	1.09328	1.06271	0.946248	0.84489	0.986781	0.552242
K4C8W7	Uncharacterized protein OS=Solanum lycopersicum GN=Solyc06g072470.2 PE=3 SV=1 - [K4C8W7_SOLLC]	18.9131	10.1255	18.9	3	0.951107	1.10837	1.01071	1.04733	1.02938	1.12511	0.963947	0.924781	0.963746	0.994396	0.552979
K4AY68	Clustered mitochondria protein homolog OS=Solanum lycopersicum GN=Solyc01g086750.2 PE=3 SV=1 - [K4AY68_SOLLC]	155.108	6.31592	1.27	2	0.892034	0.96132	1.10813	0.924919	0.9716	0.85819	1.21708	0.922671	1.13844	1.03409	0.552998
P83582	Ferredoxin OS=Solanum nigrum PE=1 SV=1 - [FER_SOLNI]	10.4337	4.2085	19.59	2	1.06401	0.979289	1.0839	0.92551	1.01318	1.03558	0.943052	1.02411	0.935448	0.984546	0.553822
Q38M52	Proteasome subunit alpha type OS=Solanum tuberosum GN=PGSC0003DMG400010543 PE=2 SV=1 - [Q38M52_SOLTU]	25.6493	5.47803	10.21	2	1.06634	1.08155	0.903652	1.02109	1.01816	1.02139	0.955502	1.0192	0.963397	0.989872	0.554133
K4CWK8	Uncharacterized protein OS=Solanum lycopersicum GN=Solyc09g091820.2 PE=4 SV=1 - [K4CWK8_SOLLC]	39.0752	5.0083	2.51	1	1.06908	1.07221	1.03443	0.942077	1.02945	1.11438	1.04327	1.00942	0.700096	0.966791	0.554512
M0ZYC0	Uncharacterized protein OS=Solanum tuberosum GN=PGSC0003DMG400004149 PE=3 SV=1 - [M0ZYC0_SOLTU]	78.1601	8.27979	1.53	1	0.969285	0.987593	1.01526	0.994468	0.99165	0.917331	1.063	1.02599	1.0503	1.01416	0.55474
K4CI86	Uncharacterized protein OS=Solanum lycopersicum GN=Solyc08g005970.2 PE=4 SV=1 - [K4CI86_SOLLC]	73.7236	5.92236	1.98	1	1.05084	0.978715	1.15693	0.906311	1.0232	0.920184	0.937168	1.00667	1.06856	0.983146	0.55475
K4D6L1	Eukaryotic translation initiation factor 3 subunit I OS=Solanum lycopersicum GN=Solyc11g017070.1 PE=3 SV=1 - [K4D6L1_SOLLC]	22.6817	7.66455	5.83	1	0.964797	0.957749	1.05464	1.01543	0.998154	1.11667	1.05028	0.950127	0.984891	1.02549	0.555441
M1CSY8	Uncharacterized protein OS=Solanum tuberosum GN=PGSC0003DMG400028754 PE=4 SV=1 - [M1CSY8_SOLTU]	37.0179	9.59814	2.52	1	0.948743	1.02251	1.04202	0.935734	0.987251	0.918492	1.14756	0.969769	1.05792	1.02344	0.555604
M1BT60	Uncharacterized protein OS=Solanum tuberosum GN=PGSC0003DMG400020298 PE=4 SV=1 - [M1BT60_SOLTU]	23.003	9.46631	16.83	4	0.977929	0.920416	0.933026	1.08811	0.979871	0.930554	0.967151	1.10983	1.05075	1.01457	0.555824
M1AC82	Uncharacterized protein OS=Solanum tuberosum GN=PGSC0003DMG400007556 PE=4 SV=1 - [M1AC82_SOLTU]	32.9763	9.08545	3	1	0.890171	0.929085	1.14479	1.01209	0.994033	1.12678	1.11297	0.972654	0.946352	1.03969	0.55628
M0ZNB4	Uncharacterized protein OS=Solanum tuberosum GN=PGSC0003DMG400001732 PE=4 SV=1 - [M0ZNB4_SOLTU]	39.8762	6.06201	5	1	0.918363	0.927699	1.12006	1.01149	0.994403	1.15573	1.07436	1.05288	0.880353	1.04083	0.556878
K4B530	Uncharacterized protein OS=Solanum lycopersicum GN=Solyc02g022810.1 PE=4 SV=1 - [K4B530_SOLLC]	7.99605	7.34229	23.38	1	0.988467	1.00227	1.08251	0.916907	0.997541	1.05513	1.09221	0.971673	0.982234	1.02531	0.557395
A4UV11	Putative ribosomal protein L34e OS=Solanum tuberosum GN=PGSC0003DMG400031258 PE=4 SV=1 - [A4UV11_SOLTU]	13.8079	11.605	21.67	2	0.983777	1.02951	0.993037	0.946214	0.988134	1.15534	1.05658	1.07952	0.841475	1.03323	0.557513
M1CCF1	Uncharacterized protein OS=Solanum tuberosum GN=PGSC0003DMG400025052 PE=4 SV=1 - [M1CCF1_SOLTU]	27.1788	8.80713	25.74	2	1.11406	1.06788	0.869549	0.99575	1.01181	0.908627	0.853886	0.996807	1.09994	0.964815	0.557768
K4BCK6	Uncharacterized protein OS=Solanum lycopersicum GN=Solyc02g090570.2 PE=4 SV=1 - [K4BCK6_SOLLC]	176.668	8.1626	2.1	3	0.941742	0.900742	1.16903	0.950404	0.99048	1.02564	1.14979	0.989585	0.977721	1.03568	0.557843
M1C8J5	Uncharacterized protein OS=Solanum tuberosum GN=PGSC0003DMG400024180 PE=3 SV=1 - [M1C8J5_SOLTU]	58.8717	6.55127	14.95	5	0.966378	0.967575	0.950626	1.0317	0.979069	0.964259	0.910148	1.04521	1.12621	1.01146	0.557901
M1BL62	Uncharacterized protein OS=Solanum tuberosum GN=PGSC0003DMG400018517 PE=4 SV=1 - [M1BL62_SOLTU]	12.0972	8.93896	8.41	1	0.964663	1.07701	0.963445	1.12225	1.03184	1.11607	1.01643	0.949107	0.889665	0.992817	0.559477
M1ASL1	Uncharacterized protein OS=Solanum tuberosum GN=PGSC0003DMG400011266 PE=4 SV=1 - [M1ASL1_SOLTU]	40.1951	5.78271	5.23	2	0.960627	0.949604	1.0026	1.07176	0.996148	0.961873	1.24347	0.966197	0.998279	1.04246	0.560209
K7VT33	Photosystem I reaction center V OS=Solanum tuberosum PE=2 SV=1 - [K7VT33_SOLTU]	13.1611	9.81787	6.67	1	0.981597	0.899729	0.937958	1.03668	0.963991	0.83355	0.951098	1.256	1.05693	1.02439	0.560228
M0ZGL7	Uncharacterized protein OS=Solanum tuberosum GN=PGSC0003DMG400000127 PE=3 SV=1 - [M0ZGL7_SOLTU]	14.6073	5.0083	12.12	1	0.891288	0.827416	1.24456	0.896815	0.965021	1.00769	1.1015	0.885337	1.1409	1.03385	0.560316
K4CM57	Aspartate aminotransferase OS=Solanum lycopersicum GN=Solyc08g068330.2 PE=3 SV=1 - [K4CM57_SOLLC]	49.6526	9.27588	11.28	2	0.987239	1.01016	0.875809	1.02786	0.975268	0.893561	0.983585	1.02801	1.15649	1.01541	0.560873
Q33BX7	Putative uncharacterized protein OS=Nicotiana tomentosiformis PE=4 SV=1 - [Q33BX7_NICTO]	31.0781	4.85596	6.43	2	1.03987	1.08689	0.912571	0.923172	0.990626	1.05588	0.919072	1.09762	1.03165	1.02606	0.56144
K4BV71	Uncharacterized protein OS=Solanum lycopersicum GN=Solyc04g079920.2 PE=4 SV=1 - [K4BV71_SOLLC]	68.7406	5.22412	1.34	1	1.09748	0.976438	1.03327	0.978845	1.02151	1.02229	1.05389	0.99787	0.908043	0.995524	0.562414
M1CN24	Uncharacterized protein OS=Solanum tuberosum GN=PGSC0003DMG400027611 PE=3 SV=1 - [M1CN24_SOLTU]	27.9786	9.5249	15.56	1	0.973494	0.981792	1.08039	1.07101	1.02667	1.11142	0.944771	0.997682	0.929264	0.995785	0.562822
M0ZVI6	Uncharacterized protein OS=Solanum tuberosum GN=PGSC0003DMG401003517 PE=4 SV=1 - [M0ZVI6_SOLTU]	12.6117	10.0376	9.91	1	1.08897	0.977249	1.01277	0.883966	0.990741	1.08271	0.953833	1.06569	0.98983	1.02302	0.562987
K4D1R2	Uncharacterized protein OS=Solanum lycopersicum GN=Solyc10g074700.1 PE=4 SV=1 - [K4D1R2_SOLLC]	45.4122	7.63525	4.6	2	0.903151	0.84144	1.23728	0.905564	0.971859	1.02916	1.20236	0.86702	1.06646	1.04125	0.563687
K4B1S1	Uncharacterized protein OS=Solanum lycopersicum GN=Solyc01g103450.2 PE=3 SV=1 - [K4B1S1_SOLLC]	74.8508	5.33838	32.01	18	1.0258	1.00183	1.01255	1.02486	1.01626	1.08083	0.987605	0.98154	0.935611	0.996396	0.564142
Q43649	Oxoglutarate malate translocator OS=Solanum tuberosum GN=omt PE=2 SV=1 - [Q43649_SOLTU]	19.2268	8.85107	22.6	1	1.09243	0.805529	1.03248	1.17327	1.02593	0.767519	0.941838	1.05517	1.07994	0.961118	0.564611
M0ZUC8	Uncharacterized protein OS=Solanum tuberosum GN=PGSC0003DMG400003194 PE=4 SV=1 - [M0ZUC8_SOLTU]	22.5954	7.41553	4.52	1	1.1654	1.02805	1.05186	0.916161	1.04037	1.05579	1.13339	0.962383	0.788862	0.985107	0.564796
K4BBJ8	Uncharacterized protein OS=Solanum lycopersicum GN=Solyc02g086910.2 PE=4 SV=1 - [K4BBJ8_SOLLC]	26.2755	5.40186	17.92	1	1.03239	1.04534	0.911508	1.08044	1.01742	0.987187	0.865891	1.08031	0.996191	0.982396	0.564984
K4BX19	Uncharacterized protein OS=Solanum lycopersicum GN=Solyc05g008450.2 PE=4 SV=1 - [K4BX19_SOLLC]	32.3787	7.60596	7.33	2	0.990905	1.05454	0.952905	1.01367	1.003	0.999531	0.942132	1.02837	0.973453	0.985871	0.565065
M1A6G8	Uncharacterized protein OS=Solanum tuberosum GN=PGSC0003DMG401006147 PE=3 SV=1 - [M1A6G8_SOLTU]	90.4328	5.33838	7.68	3	0.988168	0.992834	1.04659	1.01331	1.01022	0.957722	1.01846	0.9633	1.0412	0.995171	0.565102
K4D533	Uncharacterized protein OS=Solanum lycopersicum GN=Solyc11g007720.1 PE=3 SV=1 - [K4D533_SOLLC]	68.646	6.26514	1.24	1	0.973404	1.18378	0.835652	1.07468	1.01688	0.952311	0.87684	1.01637	1.01897	0.966123	0.565129
M1BPE8	Uncharacterized protein OS=Solanum tuberosum GN=PGSC0003DMG400019363 PE=3 SV=1 - [M1BPE8_SOLTU]	29.9789	9.26123	14.23	4	0.972873	1.04958	0.995461	1.02724	1.01129	1.06633	0.949173	1.00579	0.940713	0.990502	0.565159
Q15GI3	Isoeugenol synthase 1 OS=Petunia hybrida GN=IGS1 PE=1 SV=1 - [IGS1_PETHY]	268.308	6.88818	1.89	1	0.919298	1.03764	1.1055	0.879656	0.985522	0.932443	1.05846	1.0077	1.0986	1.0243	0.56549
K4BFY5	Uncharacterized protein OS=Solanum lycopersicum GN=Solyc03g043640.2 PE=4 SV=1 - [K4BFY5_SOLLC]	46.4464	6.84424	8.7	4	0.958696	1.00868	0.991752	1.06717	1.00658	0.952232	0.820841	1.02056	1.08176	0.968848	0.566451
K4CX75	Uncharacterized protein OS=Solanum lycopersicum GN=Solyc10g005430.2 PE=4 SV=1 - [K4CX75_SOLLC]	21.8259	5.31299	4.41	1	1.04698	1.03429	0.888084	1.09704	1.0166	0.988562	0.887513	1.04858	1.00461	0.982316	0.566951
P69040	Eukaryotic translation initiation factor 5A-1 OS=Nicotiana tabacum GN=EIF-5A1 PE=3 SV=1 - [IF5A1_TOBAC]	24.342	7.95752	23.5	1	1.03262	0.947725	1.01214	0.901688	0.973543	0.936975	0.870625	1.10427	1.1733	1.02129	0.566963
K4AZJ1	Uncharacterized protein OS=Solanum lycopersicum GN=Solyc01g094500.2 PE=4 SV=1 - [K4AZJ1_SOLLC]	47.9787	7.38623	2.05	1	1.03206	0.933867	0.935298	1.00621	0.976858	0.844634	1.04673	1.06933	1.1051	1.01645	0.567023
M0ZP47	Uncharacterized protein OS=Solanum tuberosum GN=PGSC0003DMG400001937 PE=4 SV=1 - [M0ZP47_SOLTU]	8.14922	9.40771	20	1	0.911183	1.04989	1.1138	0.987823	1.01567	0.917907	0.945194	0.942851	1.10803	0.978494	0.567342
M1C0K5	Uncharacterized protein OS=Solanum tuberosum GN=PGSC0003DMG400022211 PE=3 SV=1 - [M1C0K5_SOLTU]	64.1679	6.81494	12.93	6	0.975771	1.01704	1.0854	1.00556	1.02094	0.947579	1.07262	1.00267	0.975017	0.999472	0.567605
Q9SCB2	Phosphoenolpyruvate carboxylase 2 OS=Solanum lycopersicum GN=ppc2 PE=2 SV=1 - [Q9SCB2_SOLLC]	103.063	6.22705	8.56	1	1.07328	0.853799	1.12264	1.045	1.02368	0.864541	0.986717	1.01494	1.05408	0.98007	0.567818
H9A0F8	Brix domain-containing protein OS=Nicotiana benthamiana PE=4 SV=1 - [H9A0F8_NICBE]	36.7338	9.71533	2.8	1	0.894654	1.06143	1.03243	0.904486	0.973252	0.864604	1.1767	0.904627	1.18174	1.03192	0.569767
M1CTV7	Citrate synthase OS=Solanum tuberosum GN=PGSC0003DMG400028982 PE=3 SV=1 - [M1CTV7_SOLTU]	52.5241	7.35693	14.26	3	0.998314	1.02969	0.842733	1.01567	0.971601	0.91943	0.951098	1.03522	1.138	1.01094	0.569837
P29345	40S ribosomal protein S6 (Fragment) OS=Nicotiana tabacum GN=RPS6 PE=2 SV=2 - [RS6_TOBAC]	22.6064	10.7114	32.66	1	0.954256	1.1363	0.901771	0.921484	0.978452	1.12173	0.960041	1.20046	0.859112	1.03534	0.569903
P0CG84	Polyubiquitin (Fragment) OS=Nicotiana sylvestris GN=UBI4 PE=2 SV=1 - [UBI4P_NICSY]	301.935	7.81104	12.86	7	1.03961	0.96624	0.995658	0.975533	0.99426	1.04786	0.975407	1.05895	0.965427	1.01191	0.569911
K4C864	Uncharacterized protein OS=Solanum lycopersicum GN=Solyc06g068910.2 PE=4 SV=1 - [K4C864_SOLLC]	69.1851	7.92822	2.37	1	0.985017	1.07989	0.965629	0.927289	0.989455	1.0382	0.992092	1.01992	0.99298	1.0108	0.570203
M1CLW5	Pyruvate kinase OS=Solanum tuberosum GN=PGSC0003DMG400027321 PE=3 SV=1 - [M1CLW5_SOLTU]	57.5093	7.48877	25.43	8	1.0187	0.984244	0.99277	1.01555	1.00282	0.993905	0.926993	1.03041	1.00193	0.988308	0.570898
Q2VEF0	Cytochrome b6 OS=Solanum tuberosum GN=petB PE=3 SV=1 - [CYB6_SOLTU]	24.1346	8.76318	19.07	4	1.0167	0.857839	0.908242	1.07184	0.963654	0.884053	0.933161	1.16132	1.0682	1.01168	0.571613
K4B6A3	Uncharacterized protein OS=Solanum lycopersicum GN=Solyc02g062130.2 PE=4 SV=1 - [K4B6A3_SOLLC]	40.2916	8.48486	35.56	2	0.98532	0.975591	1.14595	0.9804	1.02182	0.946502	1.00373	0.995672	1.03075	0.994162	0.571727
M1ADE4	Uncharacterized protein OS=Solanum tuberosum GN=PGSC0003DMG400007880 PE=4 SV=1 - [M1ADE4_SOLTU]	30.2033	8.36768	9.77	3	1.04134	1.05864	0.94821	0.993827	1.0105	0.943743	0.8498	1.113	0.988412	0.973739	0.572139
M0ZSA3	Uncharacterized protein OS=Solanum tuberosum GN=PGSC0003DMG400002703 PE=4 SV=1 - [M0ZSA3_SOLTU]	46.9643	5.69385	30.72	12	1.02242	0.941984	1.01043	1.08412	1.01474	0.954296	0.963946	1.01412	1.04086	0.993306	0.572228
K4D594	Uncharacterized protein OS=Solanum lycopersicum GN=Solyc11g008340.1 PE=4 SV=1 - [K4D594_SOLLC]	126.741	5.89697	4.81	4	0.998385	0.886557	1.10832	0.878501	0.96794	1.02223	1.13725	0.879267	1.01371	1.01311	0.572232
M1ASB6	50S ribosomal protein L35 OS=Solanum tuberosum GN=PGSC0003DMG400011211 PE=3 SV=1 - [M1ASB6_SOLTU]	16.63	11.4731	9.27	1	0.967906	1.05091	0.886773	1.0303	0.983973	1.05079	0.892329	1.14501	1.00216	1.02257	0.572299
M1BBV8	Uncharacterized protein OS=Solanum tuberosum GN=PGSC0003DMG400016181 PE=4 SV=1 - [M1BBV8_SOLTU]	39.5691	7.57666	17.22	6	1.07746	0.833001	1.06458	1.13775	1.0282	0.849789	1.0005	1.11348	0.942014	0.976446	0.573632
M1A8Y0	Uncharacterized protein OS=Solanum tuberosum GN=PGSC0003DMG400006777 PE=4 SV=1 - [M1A8Y0_SOLTU]	21.3275	7.84033	4.26	1	0.980358	1.15569	0.712079	0.995053	0.960794	1.0799	0.898242	0.971045	1.15388	1.02576	0.57375
M1CIN8	Uncharacterized protein OS=Solanum tuberosum GN=PGSC0003DMG400026528 PE=4 SV=1 - [M1CIN8_SOLTU]	7.50699	9.99365	16.42	1	0.932259	1.07864	1.16826	0.990248	1.04235	1.06064	1.15715	0.796599	0.929782	0.986042	0.574112
M1CR39	Uncharacterized protein OS=Solanum tuberosum GN=PGSC0003DMG400028348 PE=4 SV=1 - [M1CR39_SOLTU]	55.5847	5.021	6.56	2	0.937977	1.0287	1.03407	1.09926	1.025	0.908857	1.12234	1.029	0.884884	0.986269	0.574335
C0LIR5	Thiosulfate:cyanide sulfurtransferase-like protein (Fragment) OS=Solanum lycopersicum GN=MST2 PE=2 SV=1 - [C0LIR5_SOLLC]	34.9415	5.68115	6.92	1	1.01899	0.904249	1.20964	0.992192	1.03127	0.891017	1.09443	0.986478	0.969195	0.985279	0.574384
M0ZYS2	Uncharacterized protein OS=Solanum tuberosum GN=PGSC0003DMG400004277 PE=4 SV=1 - [M0ZYS2_SOLTU]	65.3427	8.45557	17.61	5	1.04224	0.972163	1.22395	0.917836	1.03905	0.943429	1.02553	0.95	1.06018	0.994785	0.574408
B5LAU5	DH putative beta-hydroxyacyl-ACP dehydratase OS=Capsicum annuum PE=2 SV=1 - [B5LAU5_CAPAN]	23.9664	9.29053	12.09	1	0.92908	0.881973	1.14666	0.948929	0.976661	0.906691	1.03361	1.05288	1.08089	1.01852	0.574685
M1D206	Uncharacterized protein OS=Solanum tuberosum GN=PGSC0003DMG400030971 PE=4 SV=1 - [M1D206_SOLTU]	23.9987	4.95752	3.32	1	1.02855	1.07277	0.908866	1.12302	1.0333	1.1421	0.911598	1.0406	0.847465	0.98544	0.57505
M1BS07	Uncharacterized protein OS=Solanum tuberosum GN=PGSC0003DMG400020064 PE=3 SV=1 - [M1BS07_SOLTU]	6.77884	10.1987	11.67	1	1.01619	1.15481	0.824315	0.91118	0.976622	1.04044	0.855241	1.24461	1.01952	1.03995	0.575584
M1CZJ7	Eukaryotic translation initiation factor 3 subunit C OS=Solanum tuberosum GN=PGSC0003DMG400030412 PE=3 SV=1 - [M1CZJ7_SOLTU]	103.656	5.47803	2.74	3	0.885341	1.03037	0.945412	0.915365	0.944123	0.868502	0.928245	0.988795	1.16058	0.986531	0.576263
K4C2F3	Uncharacterized protein OS=Solanum lycopersicum GN=DHAR1 PE=4 SV=1 - [K4C2F3_SOLLC]	19.9544	6.29053	14.44	2	0.978264	1.08766	0.821308	1.00071	0.971986	0.994183	0.886164	1.02942	1.1679	1.01942	0.576627
K4CAK3	Uncharacterized protein OS=Solanum lycopersicum GN=Solyc06g083480.2 PE=3 SV=1 - [K4CAK3_SOLLC]	13.9461	6.11279	6.2	1	0.957255	0.957029	1.11319	0.939949	0.991855	1.0014	1.0196	0.955051	1.11668	1.02318	0.576629
M1BRQ1	Uncharacterized protein OS=Solanum tuberosum GN=PGSC0003DMG400019972 PE=3 SV=1 - [M1BRQ1_SOLTU]	61.2409	6.39209	3.62	1	1.09856	0.987658	0.990991	0.87927	0.98912	1.25605	1.04304	1.01599	0.863042	1.04453	0.576717
M1ACL0	Uncharacterized protein OS=Solanum tuberosum GN=PGSC0003DMG401007649 PE=4 SV=1 - [M1ACL0_SOLTU]	29.4098	7.63525	4.56	1	0.861711	1.02749	1.07522	1.00058	0.991252	1.06056	1.06376	0.88927	1.10869	1.03057	0.576805
M1CS66	Uncharacterized protein OS=Solanum tuberosum GN=PGSC0003DMG400028566 PE=3 SV=1 - [M1CS66_SOLTU]	28.8994	5.73193	7.69	1	1.0678	1.0249	0.955754	1.00994	1.0146	1.06889	0.968433	0.922061	1.00722	0.991652	0.577012
K4CBY0	Uncharacterized protein OS=Solanum lycopersicum GN=Solyc07g008610.1 PE=3 SV=1 - [K4CBY0_SOLLC]	77.7079	5.56689	7.05	4	1.01598	0.956755	1.27022	0.922887	1.04146	0.91984	1.12323	0.956493	0.948522	0.987022	0.577155
K4BWM1	Uncharacterized protein OS=Solanum lycopersicum GN=Solyc05g006950.2 PE=4 SV=1 - [K4BWM1_SOLLC]	66.8657	5.66846	1.67	1	0.977185	0.877888	1.25301	0.825961	0.98351	1.07288	1.2328	0.871898	1.04131	1.05472	0.577416
M1BK34	Uncharacterized protein OS=Solanum tuberosum GN=PGSC0003DMG400018276 PE=4 SV=1 - [M1BK34_SOLTU]	16.7669	9.75928	15.09	1	1.14508	0.950876	0.912495	0.995158	1.0009	0.963076	1.01385	0.995902	1.20751	1.04508	0.57781
P49037	Sucrose synthase OS=Solanum lycopersicum PE=2 SV=1 - [SUSY_SOLLC]	215.735	6.96143	5.56	6	0.967095	1.00815	1.01878	0.989107	0.995782	1.01038	0.976698	0.987917	1.05946	1.00861	0.577877
M0ZQW3	Uncharacterized protein OS=Solanum tuberosum GN=PGSC0003DMG400002389 PE=3 SV=1 - [M0ZQW3_SOLTU]	26.5441	7.41553	22.13	4	1.04684	0.970556	1.07792	1.05374	1.03726	1.02375	1.10812	0.960864	0.956223	1.01224	0.57986
K4AZQ9	Uncharacterized protein OS=Solanum lycopersicum GN=Solyc01g095200.2 PE=4 SV=1 - [K4AZQ9_SOLLC]	29.7001	7.98682	3.04	1	0.960975	1.0585	0.887148	1.00245	0.97727	0.916651	0.936683	1.08546	1.11706	1.01396	0.580537
K4CDF4	Uncharacterized protein OS=Solanum lycopersicum GN=Solyc07g032100.2 PE=4 SV=1 - [K4CDF4_SOLLC]	122.824	7.00537	4.19	1	0.919477	0.972011	0.886593	1.127	0.976271	1.03254	0.849027	1.09549	1.11671	1.02344	0.581111
P46263	Tubulin beta-1 chain OS=Solanum tuberosum GN=TUBB1 PE=2 SV=1 - [TBB1_SOLTU]	50.455	4.85596	37.25	2	0.94738	0.969332	0.976656	1.04914	0.985628	0.879103	1.03735	1.16823	1.01003	1.02368	0.581396
Q2V9B7	ADP-ribosylation factor 1-like OS=Solanum tuberosum PE=2 SV=1 - [Q2V9B7_SOLTU]	20.4095	5.57959	36.31	2	1.00007	0.982265	0.904488	1.1779	1.01618	0.856451	0.890168	1.09408	1.03515	0.968963	0.581657
M0ZG70	Uncharacterized protein OS=Solanum tuberosum GN=PGSC0003DMG400000046 PE=4 SV=1 - [M0ZG70_SOLTU]	32.16	9.5542	2.43	1	0.987643	0.942566	1.06708	1.0993	1.02415	1.06765	1.00717	1.01364	0.886398	0.993715	0.583125
K4D339	Uncharacterized protein OS=Solanum lycopersicum GN=Solyc10g081520.1 PE=4 SV=1 - [K4D339_SOLLC]	31.7261	7.95752	5.5	1	0.979485	1.04286	0.878306	0.997418	0.974518	0.975741	0.85959	1.12365	1.10581	1.0162	0.583266
M1B024	Uncharacterized protein OS=Solanum tuberosum GN=PGSC0003DMG400013080 PE=3 SV=1 - [M1B024_SOLTU]	22.3912	5.42725	18.23	1	0.984572	1.07341	0.902961	1.10975	1.01767	0.897004	0.818157	1.08748	1.07792	0.97014	0.583425
K4C607	Uncharacterized protein OS=Solanum lycopersicum GN=Solyc06g053200.2 PE=4 SV=1 - [K4C607_SOLLC]	28.6467	5.38916	5	1	0.851226	1.01196	1.21919	1.11552	1.04947	1.03974	1.16212	0.907792	0.843105	0.988189	0.583669
K4B1I2	Uncharacterized protein OS=Solanum lycopersicum GN=Solyc01g102540.2 PE=4 SV=1 - [K4B1I2_SOLLC]	124.527	6.43018	0.81	1	1.1472	0.898379	1.08601	1.0389	1.04262	1.11929	0.999336	1.07454	0.747409	0.985142	0.584268
M1C8R1	Uncharacterized protein OS=Solanum tuberosum GN=PGSC0003DMG400024216 PE=4 SV=1 - [M1C8R1_SOLTU]	70.1642	7.78174	3.9	1	0.930387	0.951723	1.26024	1.02326	1.0414	0.861679	1.0848	0.78823	1.16107	0.973945	0.584285
M1CL35	Uncharacterized protein OS=Solanum tuberosum GN=PGSC0003DMG400027129 PE=4 SV=1 - [M1CL35_SOLTU]	12.5185	10.5356	16.67	2	0.93819	1.10888	0.923512	0.966284	0.984216	1.09558	0.944756	1.10637	0.935771	1.02062	0.584425
K4D0Y5	Uncharacterized protein OS=Solanum lycopersicum GN=Solyc10g052880.1 PE=4 SV=1 - [K4D0Y5_SOLLC]	52.5336	9.11475	1.67	1	0.974647	0.971425	0.891276	1.03004	0.966847	0.968588	0.845484	1.11235	1.10583	1.00806	0.584632
M0ZUK8	Uncharacterized protein OS=Solanum tuberosum GN=PGSC0003DMG400003266 PE=4 SV=1 - [M0ZUK8_SOLTU]	6.59135	7.1665	25	1	1.0411	1.02618	0.951453	1.01594	1.00867	0.977395	1.00903	0.993991	1.00424	0.996163	0.584984
M0ZY73	Uncharacterized protein OS=Solanum tuberosum GN=PGSC0003DMG400004116 PE=4 SV=1 - [M0ZY73_SOLTU]	96.0047	6.68311	4.1	3	0.928087	0.915229	1.20167	0.859192	0.976045	1.02424	1.27971	0.916099	0.94407	1.04103	0.585775
D5JXY6	Calcium ATPase (Fragment) OS=Nicotiana benthamiana GN=NbCA1 PE=4 SV=1 - [D5JXY6_NICBE]	28.5482	6.93213	5.06	1	0.929573	1.03457	1.16525	1.0009	1.03258	0.911905	1.1628	0.963426	0.913953	0.988022	0.585874
K4BI65	Uncharacterized protein OS=Solanum lycopersicum GN=Solyc03g082890.2 PE=4 SV=1 - [K4BI65_SOLLC]	19.0175	7.12256	5.78	1	1.12458	0.974567	1.09007	0.898021	1.02181	0.776933	1.03618	1.06416	1.01534	0.973154	0.585967
K7QJP8	Anionic peroxidase OS=Capsicum annuum GN=APOD PE=2 SV=1 - [K7QJP8_CAPAN]	35.1827	6.66846	2.47	1	1.0667	1.05362	0.829829	0.868499	0.954662	0.806227	0.949892	1.1272	1.17823	1.01539	0.586234
M1CCG7	Uncharacterized protein OS=Solanum tuberosum GN=PGSC0003DMG400025060 PE=4 SV=1 - [M1CCG7_SOLTU]	28.8341	7.6499	3.19	1	0.966514	1.02187	0.933739	0.97104	0.97329	0.851851	0.956124	1.11177	1.14238	1.01553	0.586414
Q31859	Ribulose bisphosphate carboxylase large chain (Fragment) OS=Anthocercis viscosa GN=rbcL PE=3 SV=1 - [RBL_ANTVS]	45.4581	7.1665	38.48	2	1.01957	0.890499	1.03097	1.06486	1.00148	0.930637	1.00785	1.01541	0.950505	0.976101	0.587571
Q2V9A7	Peptidyl-prolyl cis-trans isomerase OS=Solanum tuberosum PE=2 SV=1 - [Q2V9A7_SOLTU]	22.2694	9.18799	22.82	4	1.0137	1.0292	0.901952	1.01819	0.990759	0.980689	0.943349	1.04911	1.09273	1.01647	0.587686
M0ZTT6	Uncharacterized protein OS=Solanum tuberosum GN=PGSC0003DMG400003076 PE=4 SV=1 - [M0ZTT6_SOLTU]	39.6973	6.48096	3.4	1	0.934334	0.988871	1.12876	0.915626	0.991898	1.15154	1.23015	0.986197	0.833243	1.05028	0.589076
K4D1W6	Uncharacterized protein OS=Solanum lycopersicum GN=Solyc10g076240.1 PE=3 SV=1 - [K4D1W6_SOLLC]	35.157	9.40771	6.62	1	0.989286	1.00604	0.934331	1.06461	0.998566	0.976855	1.01719	0.992063	1.093	1.01978	0.589297
P51824	ADP-ribosylation factor 1 OS=Solanum tuberosum PE=2 SV=2 - [ARF1_SOLTU]	488.162	6.45557	15.3	13	1.0366	0.881496	1.10219	1.0481	1.0171	0.944064	1.07402	0.996536	0.920059	0.983669	0.589799
M1B451	Uncharacterized protein OS=Solanum tuberosum GN=PGSC0003DMG400014166 PE=4 SV=1 - [M1B451_SOLTU]	32.3802	5.51611	8.39	2	0.978896	1.00161	1.19566	0.910209	1.02159	0.951654	1.03249	0.975666	0.976445	0.984064	0.591088
M0ZWJ2	Uncharacterized protein OS=Solanum tuberosum GN=PGSC0003DMG400003734 PE=4 SV=1 - [M0ZWJ2_SOLTU]	10.4835	4.71631	14.43	1	0.901628	1.00498	0.859914	1.13679	0.975829	0.986604	0.913257	1.04795	1.13061	1.01961	0.592102
Q2PYY1	Protein transport SEC13-like protein OS=Solanum tuberosum PE=2 SV=1 - [Q2PYY1_SOLTU]	13.6437	5.17334	9.76	1	0.909763	1.06729	0.98764	1.12043	1.02128	0.997882	0.854242	1.09355	0.986892	0.983141	0.59222
M0ZMN9	Uncharacterized protein OS=Solanum tuberosum GN=PGSC0003DMG400001571 PE=4 SV=1 - [M0ZMN9_SOLTU]	53.2644	5.08447	2.98	1	0.920545	0.956756	1.31406	0.956044	1.03685	0.940174	1.03613	0.896932	1.04247	0.978927	0.592665
K4CG47	Proteasome subunit alpha type OS=Solanum lycopersicum GN=Solyc07g055080.2 PE=3 SV=1 - [K4CG47_SOLLC]	6.79662	9.77393	21.67	2	0.953101	1.16811	0.996614	0.953268	1.01777	1.01908	0.944542	0.958805	1.02112	0.985885	0.593356
K4CI95	Uncharacterized protein OS=Solanum lycopersicum GN=Solyc08g006060.2 PE=3 SV=1 - [K4CI95_SOLLC]	37.0729	5.12256	5	2	1.01886	0.994262	1.11671	0.99034	1.03004	1.11668	0.993782	1.00538	0.871907	0.996938	0.594282
K4BNA1	Uncharacterized protein OS=Solanum lycopersicum GN=Solyc03g124030.2 PE=4 SV=1 - [K4BNA1_SOLLC]	48.2716	8.47021	3.15	1	0.938963	0.930317	1.19111	0.88087	0.985314	1.0824	1.30863	0.909681	0.906737	1.05186	0.594417
K4CNE8	ATP-dependent Clp protease proteolytic subunit OS=Solanum lycopersicum GN=Solyc08g077890.2 PE=3 SV=1 - [K4CNE8_SOLLC]	32.8838	7.26904	5	1	0.966048	1.03837	0.899745	1.17396	1.01953	0.965197	0.993625	1.00264	0.976405	0.984467	0.594668
M1CNR2	Uncharacterized protein OS=Solanum tuberosum GN=PGSC0003DMG400027787 PE=4 SV=1 - [M1CNR2_SOLTU]	31.769	4.89404	5.54	2	0.945104	0.994817	0.894044	1.0091	0.960765	1.0571	0.899546	1.01663	0.966315	0.984899	0.59507
M1CI12	Uncharacterized protein OS=Solanum tuberosum GN=PGSC0003DMG400026402 PE=3 SV=1 - [M1CI12_SOLTU]	45.2392	9.05615	2.12	1	0.979175	0.998037	0.987392	1.09769	1.01557	0.794073	0.999322	1.06744	1.04498	0.976454	0.596378
M0ZPZ4	Uncharacterized protein OS=Solanum tuberosum GN=PGSC0003DMG400002146 PE=4 SV=1 - [M0ZPZ4_SOLTU]	21.0501	9.05615	5.13	1	0.992521	1.00224	0.850956	1.06513	0.977711	1.05553	0.904822	1.13996	0.964084	1.0161	0.596479
K4DGU4	Uncharacterized protein OS=Solanum lycopersicum GN=Solyc12g088730.1 PE=3 SV=1 - [K4DGU4_SOLLC]	26.6032	9.49561	5.42	1	0.865878	1.00292	0.932815	1.11681	0.979605	0.947908	0.945173	1.15927	1.03029	1.02066	0.596645
K4C8F8	Uncharacterized protein OS=Solanum lycopersicum GN=Solyc06g069860.2 PE=4 SV=1 - [K4C8F8_SOLLC]	6.88002	11.312	33.33	1	0.907697	1.01835	1.13138	0.912605	0.992507	1.01417	1.04915	1.10118	0.945715	1.02756	0.59696
M1AAI7	Uncharacterized protein OS=Solanum tuberosum GN=PGSC0003DMG401007138 PE=4 SV=1 - [M1AAI7_SOLTU]	23.2354	8.26514	8.49	2	0.986008	0.901599	0.972006	1.0959	0.988878	0.937584	1.09766	1.05586	0.98436	1.01887	0.597703
M1BJT9	Uncharacterized protein OS=Solanum tuberosum GN=PGSC0003DMG401018218 PE=4 SV=1 - [M1BJT9_SOLTU]	18.1186	4.94482	13.66	2	1.0534	0.899391	1.07189	0.984198	1.00222	0.913947	1.06568	1.16803	1.00881	1.03912	0.598115
Q03664	Probable glutathione S-transferase OS=Nicotiana tabacum PE=2 SV=1 - [GSTX3_TOBAC]	25.7314	6.39209	11.21	1	1.02465	1.01057	0.788334	1.09554	0.979773	1.07632	0.927873	1.06006	1.02348	1.02193	0.598138
M1CZE6	Uncharacterized protein OS=Solanum tuberosum GN=PGSC0003DMG400030377 PE=4 SV=1 - [M1CZE6_SOLTU]	11.4697	6.07471	13	1	0.96842	0.943982	1.1888	0.865217	0.991605	1.0394	1.17516	0.990146	0.951324	1.03901	0.598573
K4CU73	Uncharacterized protein OS=Solanum lycopersicum GN=Solyc09g064450.2 PE=4 SV=1 - [K4CU73_SOLLC]	43.7117	9.31982	12.72	5	0.98576	1.05632	0.910504	0.992	0.986145	1.07704	0.882974	1.07224	1.03432	1.01664	0.598884
M1CQX3	Uncharacterized protein OS=Solanum tuberosum GN=PGSC0003DMG400028317 PE=3 SV=1 - [M1CQX3_SOLTU]	54.1807	6.58057	11.74	6	1.01402	1.0142	0.931873	1.01994	0.995008	0.987735	0.969793	1.03678	1.04877	1.01077	0.598972
K4CNA8	Uncharacterized protein OS=Solanum lycopersicum GN=Solyc08g077490.1 PE=4 SV=1 - [K4CNA8_SOLLC]	74.3881	6.59521	3.81	2	0.929498	0.904033	1.18081	0.904801	0.979785	0.894513	1.1623	0.936561	1.13849	1.03297	0.599679
M0ZKC2	Uncharacterized protein OS=Solanum tuberosum GN=PGSC0003DMG400000995 PE=4 SV=1 - [M0ZKC2_SOLTU]	58.8561	6.62451	1.51	1	0.893054	0.949198	1.19193	1.15356	1.04694	1.10763	1.09798	0.915669	0.848263	0.992384	0.600455
Q4ZJK2	Cytosolic ascorbate peroxidase OS=Capsicum annuum GN=APX1 PE=2 SV=1 - [Q4ZJK2_CAPAN]	19.825	5.17334	24.44	1	1.11132	0.866246	0.863153	1.04205	0.970693	1.01211	0.874521	1.02102	1.16649	1.01853	0.600706
K4DH58	Uncharacterized protein OS=Solanum lycopersicum GN=Solyc12g095850.1 PE=3 SV=1 - [K4DH58_SOLLC]	45.5945	8.30908	4.38	2	0.873322	0.941811	1.19043	0.931011	0.984143	1.0057	1.20367	0.851193	1.10332	1.04097	0.600816
M1C5D1	Uncharacterized protein OS=Solanum tuberosum GN=PGSC0003DMG400023411 PE=4 SV=1 - [M1C5D1_SOLTU]	30.7725	6.02393	5.34	1	1.07407	0.869526	0.953015	1.03566	0.983067	0.919627	1.04694	0.99451	1.10393	1.01625	0.600948
P54153	Peptide methionine sulfoxide reductase (Fragment) OS=Solanum lycopersicum GN=E4 PE=3 SV=1 - [MSRA_SOLLC]	21.9046	6.53662	14.29	2	1.06334	1.10555	0.873321	0.998144	1.01009	0.97227	0.893048	1.02709	1.01596	0.977091	0.601022
K4AW47	Uncharacterized protein OS=Solanum lycopersicum GN=Solyc01g058390.2 PE=3 SV=1 - [K4AW47_SOLLC]	41.6231	6.20166	3.95	2	1.00279	1.0292	0.952033	0.994891	0.994727	1.03782	0.981791	1.05375	0.96479	1.00954	0.601717
M1AFA9	Glutamate dehydrogenase OS=Solanum tuberosum GN=PGSC0003DMG400008356 PE=3 SV=1 - [M1AFA9_SOLTU]	44.6359	6.66846	17.52	4	0.957403	1.05719	0.981757	0.963233	0.989897	0.933341	1.04572	0.996167	1.06727	1.01063	0.602743
M0ZTX6	Uncharacterized protein OS=Solanum tuberosum GN=PGSC0003DMG400003103 PE=4 SV=1 - [M0ZTX6_SOLTU]	32.4547	6.43018	6.9	1	1.00164	0.948602	1.09778	1.00367	1.01292	1.01424	1.11011	0.883918	0.908944	0.979302	0.602865
M1BLS8	Uncharacterized protein OS=Solanum tuberosum GN=PGSC0003DMG400018653 PE=4 SV=1 - [M1BLS8_SOLTU]	49.2888	7.07861	2.52	1	0.920491	1.03915	0.907746	1.07959	0.986744	1.00173	0.959444	0.993184	1.11176	1.01653	0.602884
M1B694	Uncharacterized protein OS=Solanum tuberosum GN=PGSC0003DMG400014674 PE=4 SV=1 - [M1B694_SOLTU]	69.1288	6.31592	4.19	2	0.990354	0.913038	1.01052	1.16175	1.01891	0.972178	1.00005	0.913148	1.0572	0.985646	0.60439
A7XB36	Adenosylhomocysteinase OS=Petunia hybrida PE=2 SV=1 - [A7XB36_PETHY]	39.8914	6.15088	34.25	3	1.05841	1.02341	0.86816	1.129	1.01974	0.873455	0.906851	0.971688	1.14735	0.974837	0.604783
M1APJ5	Acyl-coenzyme A oxidase OS=Solanum tuberosum GN=PGSC0003DMG400010548 PE=3 SV=1 - [M1APJ5_SOLTU]	75.8515	7.79639	2.52	2	1.08353	1.05882	0.864169	1.0659	1.0181	0.966675	0.94482	0.991122	1.04459	0.986801	0.605054
K4DBI5	Uncharacterized protein OS=Solanum lycopersicum GN=Solyc12g006480.1 PE=4 SV=1 - [K4DBI5_SOLLC]	211.764	5.43994	0.59	1	1.11985	0.818225	0.965209	0.995635	0.97473	0.950799	0.89411	1.1489	1.09256	1.02159	0.605167
K4CBN7	Uncharacterized protein OS=Solanum lycopersicum GN=Solyc07g007670.2 PE=4 SV=1 - [K4CBN7_SOLLC]	40.913	6.59521	1.96	1	0.971377	1.01016	0.79668	1.11627	0.973621	1.04672	0.85188	1.14762	1.04614	1.02309	0.605579
M1ANB0	Uncharacterized protein OS=Solanum tuberosum GN=PGSC0003DMG400010240 PE=4 SV=1 - [M1ANB0_SOLTU]	48.6389	8.07471	2.77	1	1.27516	1.02488	0.941827	0.849209	1.02277	0.868284	0.809649	1.06106	1.09905	0.959509	0.60576
K4BIC0	Uncharacterized protein OS=Solanum lycopersicum GN=Solyc03g083440.2 PE=4 SV=1 - [K4BIC0_SOLLC]	243.773	6.90283	1.44	3	0.830437	0.991774	1.08244	1.04918	0.988458	0.972517	1.27071	0.910744	1.0122	1.04154	0.605815
K4B9T8	Uncharacterized protein OS=Solanum lycopersicum GN=Solyc02g080670.2 PE=4 SV=1 - [K4B9T8_SOLLC]	62.0654	9.45166	2.19	1	0.97646	0.981399	0.978822	1.04956	0.996561	1.10282	0.932005	1.04012	1.00004	1.01875	0.605851
M9T025	Dihydroflavonol 4-reductase OS=Petunia hybrida GN=DFR3 PE=2 SV=1 - [M9T025_PETHY]	38.7146	5.93506	13.39	2	0.998601	1.03536	1.11977	0.919784	1.01838	0.964666	1.01858	0.94814	1.0386	0.992497	0.606224
M1ACH1	Uncharacterized protein OS=Solanum tuberosum GN=PGSC0003DMG400007617 PE=3 SV=1 - [M1ACH1_SOLTU]	9.10674	9.39307	10.47	1	1.01976	1.02163	0.991413	1.0098	1.01065	0.968834	0.922268	0.980344	1.08919	0.99016	0.606339
M1AHD8	Uncharacterized protein OS=Solanum tuberosum GN=PGSC0003DMG400008871 PE=3 SV=1 - [M1AHD8_SOLTU]	61.4153	9.51025	9.48	5	0.953379	0.958515	1.07411	0.933308	0.979829	1.02903	1.12251	0.991622	0.898946	1.01053	0.607009
K4CG09	Uncharacterized protein OS=Solanum lycopersicum GN=Solyc07g054670.2 PE=4 SV=1 - [K4CG09_SOLLC]	64.5074	8.5874	1.39	1	1.07171	1.09909	0.917431	0.974106	1.01559	1.02959	0.91796	1.01881	0.987934	0.988571	0.607198
Q38M70	Putative uncharacterized protein OS=Solanum tuberosum PE=2 SV=1 - [Q38M70_SOLTU]	18.1019	10.8872	28.3	2	0.957555	0.998211	1.06331	0.876832	0.973976	1.01542	0.91379	1.09842	0.986563	1.00355	0.607555
Q850R9	Biotic cell death-associated protein OS=Nicotiana glutinosa GN=CDM1 PE=2 SV=1 - [Q850R9_NICGU]	25.1418	8.57275	8.3	2	0.979108	1.17507	0.956765	0.965385	1.01908	0.823436	0.953083	0.983215	1.13678	0.974127	0.607791
K4AQ84	Uncharacterized protein OS=Solanum lycopersicum GN=Solyc00g011890.2 PE=4 SV=1 - [K4AQ84_SOLLC]	114.085	7.72314	3.57	2	1.02277	1.02696	1.03668	0.955456	1.01047	0.84813	1.11532	0.959083	0.989888	0.978106	0.609068
K4DH42	Uncharacterized protein OS=Solanum lycopersicum GN=Solyc12g094700.1 PE=3 SV=1 - [K4DH42_SOLLC]	37.1631	5.73193	4.83	1	1.00458	0.947937	1.02495	0.900384	0.969462	0.882946	1.05286	0.877424	1.29223	1.02636	0.609074
K4BVX6	Uncharacterized protein OS=Solanum lycopersicum GN=Solyc04g082490.2 PE=4 SV=1 - [K4BVX6_SOLLC]	142.112	6.48096	0.77	1	1.01268	1.01238	0.735345	1.11892	0.969832	0.955092	0.956045	1.05751	1.11063	1.01982	0.609232
M1ATK6	Uncharacterized protein OS=Solanum tuberosum GN=PGSC0003DMG400011500 PE=4 SV=1 - [M1ATK6_SOLTU]	111.111	5.37646	3.04	2	0.92113	0.982098	1.07509	1.00664	0.996238	0.986543	1.12025	0.975968	1.00179	1.02114	0.609303
M0ZW66	Uncharacterized protein OS=Solanum tuberosum GN=PGSC0003DMG400003653 PE=4 SV=1 - [M0ZW66_SOLTU]	22.2202	6.13818	8.82	2	0.980342	0.976566	0.920399	0.975664	0.963243	0.861	0.910159	1.08842	1.15515	1.00368	0.60935
M1AB67	Uncharacterized protein OS=Solanum tuberosum GN=PGSC0003DMG400007294 PE=3 SV=1 - [M1AB67_SOLTU]	130.642	7.78174	2.31	2	0.998923	0.941779	1.07756	0.950362	0.992156	1.03605	1.18448	0.949628	0.93981	1.02749	0.609585
M0ZM28	Uncharacterized protein OS=Solanum tuberosum GN=PGSC0003DMG400001440 PE=4 SV=1 - [M0ZM28_SOLTU]	117.886	5.49072	1.25	1	0.969117	1.06441	0.891174	1.03978	0.99112	1.00327	0.998031	1.02056	1.03213	1.0135	0.609965
M1AFD8	Uncharacterized protein OS=Solanum tuberosum GN=PGSC0003DMG400008374 PE=4 SV=1 - [M1AFD8_SOLTU]	11.3798	7.25439	12.87	1	0.903514	0.978494	1.0842	0.87877	0.961244	0.93061	1.21981	0.973334	0.906895	1.00766	0.610247
K4CU43	Uncharacterized protein OS=Solanum lycopersicum GN=Solyc09g063130.2 PE=4 SV=1 - [K4CU43_SOLLC]	14.8627	9.77393	21.43	1	1.03361	0.910213	1.16059	0.971635	1.01901	1.07262	1.06481	0.939521	0.830141	0.976773	0.610499
P25317	Probable glutathione S-transferase parA OS=Nicotiana tabacum GN=PARA PE=2 SV=1 - [GSTXA_TOBAC]	25.2089	6.07471	9.09	1	0.842695	0.989009	1.26635	1.05715	1.0388	0.883684	1.11152	0.886776	1.04584	0.981954	0.611221
M1D6H5	Uncharacterized protein OS=Solanum tuberosum GN=PGSC0003DMG400033054 PE=4 SV=1 - [M1D6H5_SOLTU]	27.3412	7.21045	3.1	1	0.923021	1.15249	0.852248	1.00519	0.983237	1.02685	0.981637	1.02712	1.04501	1.02015	0.611518
Q1W7F5	DNA photolyase protein (Fragment) OS=Solanum arcanum GN=At2g47590 PE=4 SV=2 - [Q1W7F5_9SOLN]	16.2483	5.41455	7.59	1	1.11159	0.979597	0.990671	0.885845	0.991926	1.18667	1.0657	1.04239	0.852407	1.03679	0.6118
K4BZA6	Uncharacterized protein OS=Solanum lycopersicum GN=Solyc05g018520.2 PE=4 SV=1 - [K4BZA6_SOLLC]	35.4544	8.80713	3.72	1	1.04252	0.958955	1.05558	0.877667	0.98368	0.920951	0.998619	1.03646	1.09708	1.01328	0.612383
P62980	Ubiquitin-40S ribosomal protein S27a OS=Solanum lycopersicum GN=UBI3 PE=3 SV=2 - [RS27A_SOLLC]	32.685	9.36377	19.1	1	0.967171	1.10168	0.999838	0.977414	1.01153	0.937397	0.988124	1.03077	1.01073	0.991756	0.613391
M1A0E2	Uncharacterized protein OS=Solanum tuberosum GN=PGSC0003DMG400004682 PE=3 SV=1 - [M1A0E2_SOLTU]	18.1844	9.61279	16.67	3	1.00076	1.06854	1.01886	1.02402	1.02804	1.09331	1.07309	0.958074	0.866119	0.997648	0.613899
P07979	Lichenase OS=Nicotiana plumbaginifolia GN=GN1 PE=2 SV=3 - [GUB_NICPL]	252.407	8.1333	1.9	3	1.04353	0.897179	1.167	1.04388	1.0379	0.916215	1.10438	1.02462	0.959775	1.00125	0.614509
M1CHE2	Uncharacterized protein OS=Solanum tuberosum GN=PGSC0003DMG400026245 PE=4 SV=1 - [M1CHE2_SOLTU]	29.4595	5.021	4.51	1	0.996121	0.9896	0.900273	1.04918	0.983794	1.0492	0.855324	1.09688	1.0697	1.01777	0.614594
K4CUL2	Uncharacterized protein OS=Solanum lycopersicum GN=Solyc09g065860.2 PE=4 SV=1 - [K4CUL2_SOLLC]	35.0838	6.93213	8.65	2	0.998815	0.944018	1.06644	0.987881	0.99929	0.946348	1.12883	0.919	1.14251	1.03417	0.614968
Q8W1A7	Aquaporin-like protein OS=Petunia hybrida GN=PIP2;2 PE=2 SV=1 - [Q8W1A7_PETHY]	27.2614	9.45166	12.11	2	0.973489	1.03697	0.842367	1.00804	0.965217	0.877504	0.912566	1.1241	1.11311	1.00682	0.615272
C0KFC7	COSII_At2g15890 (Fragment) OS=Solanum chmielewskii PE=4 SV=1 - [C0KFC7_9SOLN]	5.2098	8.17725	18.75	1	0.975099	1.13029	0.824174	1.00534	0.983727	1.0552	1.00717	0.950738	1.07047	1.02089	0.615527
E7BYE5	Alpha-mannosidase OS=Capsicum annuum PE=2 SV=1 - [E7BYE5_CAPAN]	116.459	6.7417	4.37	2	0.999522	0.932895	1.10934	0.94076	0.99563	0.886718	1.0013	1.09318	1.15207	1.03332	0.61557
K4B3F5	Uncharacterized protein OS=Solanum lycopersicum GN=Solyc01g109420.2 PE=4 SV=1 - [K4B3F5_SOLLC]	21.1294	6.354	8.29	1	1.13438	1.04327	1.03192	0.9502	1.03994	1.1948	0.976763	1.0064	0.780786	0.989686	0.615723
K4B7K2	Uncharacterized protein OS=Solanum lycopersicum GN=Solyc02g068700.2 PE=4 SV=1 - [K4B7K2_SOLLC]	19.4594	8.96826	8.89	1	0.928015	1.08307	1.00575	0.962742	0.994895	1.01748	0.970435	1.04928	1.02268	1.01497	0.615997
M1C1E5	Uncharacterized protein OS=Solanum tuberosum GN=PGSC0003DMG400022378 PE=4 SV=1 - [M1C1E5_SOLTU]	37.0472	5.66846	2.44	1	0.982317	0.988366	0.938253	1.01675	0.981422	0.924219	0.886506	1.12927	1.13538	1.01884	0.616318
O82531	Proteasome subunit beta type-1 OS=Petunia hybrida GN=PBF1 PE=2 SV=1 - [PSB1_PETHY]	11.1976	4.62744	25.24	2	1.04314	0.996138	1.12185	0.995211	1.03908	0.947402	1.08411	0.983052	1.05079	1.01634	0.61654
M1CVV1	Uncharacterized protein OS=Solanum tuberosum GN=PGSC0003DMG400029499 PE=3 SV=1 - [M1CVV1_SOLTU]	17.7622	5.98584	18.67	3	1.00148	0.944095	1.1518	0.96667	1.01601	1.0239	0.982643	0.937662	1.01036	0.988641	0.616853
M1C2Q3	Uncharacterized protein OS=Solanum tuberosum GN=PGSC0003DMG402022708 PE=4 SV=1 - [M1C2Q3_SOLTU]	28.9291	6.80029	3.47	1	1.02373	1.04496	0.948417	1.01382	1.00773	0.955536	1.00471	1.03874	0.97346	0.99311	0.616898
K4BLV2	Uncharacterized protein OS=Solanum lycopersicum GN=Solyc03g118010.2 PE=4 SV=1 - [K4BLV2_SOLLC]	92.0774	6.39209	8.37	7	0.948666	1.03269	0.939785	1.02295	0.986022	0.978906	1.14052	0.971601	0.95852	1.01239	0.616994
M1B992	Uncharacterized protein OS=Solanum tuberosum GN=PGSC0003DMG400015501 PE=4 SV=1 - [M1B992_SOLTU]	55.6958	8.17725	2.22	1	0.885868	0.978576	1.06052	1.02922	0.988546	0.998864	1.18501	0.842884	1.10598	1.03318	0.617404
K4B3Q8	Uncharacterized protein OS=Solanum lycopersicum GN=Solyc01g110450.2 PE=4 SV=1 - [K4B3Q8_SOLLC]	33.5762	6.60986	2.67	1	0.930046	1.13988	0.953508	1.03957	1.01575	0.887676	0.880558	1.11442	1.02441	0.976766	0.617467
K4CY74	Uncharacterized protein OS=Solanum lycopersicum GN=Solyc10g008980.2 PE=4 SV=1 - [K4CY74_SOLLC]	38.3356	9.77393	3.66	1	1.045	0.794841	0.993933	1.13003	0.990952	0.745366	0.811376	1.06836	1.09783	0.930733	0.617475
Q4LAX0	Phi-1 protein (Fragment) OS=Capsicum chinense GN=phi-1 PE=2 SV=1 - [Q4LAX0_CAPCH]	20.8554	7.13721	7.04	1	1.0109	1.14284	0.907713	0.981372	1.01071	0.942745	0.891584	1.07771	0.997559	0.977399	0.61796
K4CMY9	Phosphoribulokinase OS=Solanum lycopersicum GN=Solyc08g076220.2 PE=3 SV=1 - [K4CMY9_SOLLC]	44.3935	6.37939	38.75	14	1.03759	1.0085	0.923009	1.05987	1.00724	0.996269	0.934005	1.05003	0.967035	0.986836	0.618368
M1AAU6	Uncharacterized protein OS=Solanum tuberosum GN=PGSC0003DMG400007199 PE=4 SV=1 - [M1AAU6_SOLTU]	21.7558	4.53857	13.64	1	1.02663	1.08034	0.873178	1.04539	1.00639	0.943449	0.888037	1.08165	0.983658	0.974199	0.618811
K4BV11	Uncharacterized protein OS=Solanum lycopersicum GN=Solyc04g079270.2 PE=4 SV=1 - [K4BV11_SOLLC]	40.027	9.81787	3.06	1	1.01501	0.996735	0.915454	1.04201	0.992301	1.01888	0.950491	1.00212	1.07668	1.01205	0.618966
M1AIR8	Uncharacterized protein OS=Solanum tuberosum GN=PGSC0003DMG400009154 PE=4 SV=1 - [M1AIR8_SOLTU]	47.8116	6.29053	29.67	13	0.985877	1.03278	0.917208	1.03171	0.991894	1.03614	0.933759	1.03635	1.04015	1.0116	0.619011
Q40877	P21 OS=Petunia hybrida GN=PeTh3 PE=2 SV=1 - [Q40877_PETHY]	39.2504	6.17627	7.26	3	1.02811	1.17032	0.882142	0.992497	1.01827	0.96366	0.921148	1.06542	0.980472	0.982676	0.6192
M0ZL16	Uncharacterized protein OS=Solanum tuberosum GN=PGSC0003DMG400001190 PE=4 SV=1 - [M0ZL16_SOLTU]	68.5278	9.40771	2.74	2	1.03876	1.01993	0.923261	1.0017	0.995911	1.0807	1.02729	1.0151	0.940966	1.01601	0.619426
Q4LDR0	Heat shock protein OS=Solanum lycopersicum GN=Lehsp100/ClpB PE=2 SV=1 - [Q4LDR0_SOLLC]	70.2463	6.7124	3.55	1	0.961398	1.07237	0.926734	1.10303	1.01588	0.993573	1.02178	1.00075	0.950006	0.991528	0.619832
Q4LAW9	Malate dehydrogenase (Fragment) OS=Capsicum chinense GN=mdh PE=2 SV=1 - [Q4LAW9_CAPCH]	19.9741	5.56689	13.11	1	0.980191	1.08974	1.01969	0.969009	1.01466	0.899582	1.00581	0.975746	1.08036	0.990375	0.620491
Q84P53	Gamma aminobutyrate transaminase 2 OS=Solanum lycopersicum GN=GABA-TP2 PE=1 SV=1 - [GATP2_SOLLC]	114.799	7.62061	3.37	3	1.01766	0.914833	0.917224	1.04974	0.974866	0.979487	0.955018	1.04421	1.00438	0.995775	0.620674
O24116	GTP-binding protein (Fragment) OS=Nicotiana plumbaginifolia PE=2 SV=1 - [O24116_NICPL]	14.3916	5.84619	42.86	4	0.977556	0.961282	1.04152	1.03917	1.00488	1.00355	1.04976	0.951502	0.948332	0.988285	0.620723
M1BC31	Uncharacterized protein OS=Solanum tuberosum GN=PGSC0003DMG400016231 PE=4 SV=1 - [M1BC31_SOLTU]	16.4355	5.46533	12.67	1	1.01634	1.04263	1.14896	0.863333	1.01781	0.853966	1.08508	0.952221	1.01976	0.977757	0.621586
M1CXV9	Uncharacterized protein OS=Solanum tuberosum GN=PGSC0003DMG400029983 PE=4 SV=1 - [M1CXV9_SOLTU]	22.1803	7.50342	6.67	1	1.13342	1.03856	0.863255	0.851867	0.971776	0.904534	0.956382	1.0946	1.10937	1.01622	0.623146
K4B612	Uncharacterized protein OS=Solanum lycopersicum GN=Solyc02g050240.2 PE=4 SV=1 - [K4B612_SOLLC]	43.2985	6.31592	2.62	1	0.959337	0.911746	1.15876	0.948261	0.994525	1.02425	1.13615	0.919363	1.04623	1.0315	0.623466
M1BJG8	Uncharacterized protein OS=Solanum tuberosum GN=PGSC0003DMG400018129 PE=4 SV=1 - [M1BJG8_SOLTU]	22.6368	9.18799	6.9	1	0.968568	1.04583	0.934503	0.992822	0.985431	1.04486	0.97604	0.880545	1.18631	1.02194	0.623589
M1BEG6	Uncharacterized protein OS=Solanum tuberosum GN=PGSC0003DMG400016826 PE=3 SV=1 - [M1BEG6_SOLTU]	40.3886	7.23975	22.79	7	1.01892	1.03785	1.00186	0.939919	0.999638	1.00165	1.03937	0.972698	1.0404	1.01353	0.6236
C8YNG6	3-ketoacyl CoA thiolase 1 OS=Petunia hybrida PE=2 SV=1 - [C8YNG6_PETHY]	48.8352	8.29443	18.18	3	1.05849	0.940459	1.00441	0.940576	0.985983	0.988963	1.19235	0.901735	1.00351	1.02164	0.62367
M1A2T5	Peptidyl-prolyl cis-trans isomerase OS=Solanum tuberosum GN=PGSC0003DMG400005232 PE=3 SV=1 - [M1A2T5_SOLTU]	26.5095	9.02686	25.81	1	0.963468	1.03359	0.92504	1.05989	0.995497	1.03244	0.915923	1.14072	1.0084	1.02437	0.625153
K4C7L2	Uncharacterized protein OS=Solanum lycopersicum GN=Solyc06g065840.2 PE=4 SV=1 - [K4C7L2_SOLLC]	130.256	6.68311	0.76	1	0.910815	0.883021	1.0133	1.13629	0.985857	0.981697	0.966591	1.06194	1.06602	1.01906	0.62535
M1A6L5	Uncharacterized protein OS=Solanum tuberosum GN=PGSC0003DMG401006174 PE=4 SV=1 - [M1A6L5_SOLTU]	61.2409	6.75635	3.71	2	1.06731	1.02824	1.0937	0.990686	1.04498	1.14746	1.14206	0.908255	0.783313	0.995271	0.625427
M1CE05	Uncharacterized protein OS=Solanum tuberosum GN=PGSC0003DMG400025455 PE=4 SV=1 - [M1CE05_SOLTU]	53.3461	7.32764	5.37	2	0.952501	1.05702	0.913375	1.032	0.988724	1.00999	1.04657	0.893948	1.12595	1.01912	0.625711
M1A731	Uncharacterized protein OS=Solanum tuberosum GN=PGSC0003DMG400006289 PE=3 SV=1 - [M1A731_SOLTU]	122.841	6.56592	1.75	2	0.898594	0.993729	0.975439	1.10873	0.994124	1.08923	0.941646	1.11948	0.955354	1.02643	0.62586
M1DIT5	Uncharacterized protein OS=Solanum tuberosum GN=PGSC0003DMG400039300 PE=4 SV=1 - [M1DIT5_SOLTU]	9.71714	5.21143	12.79	1	0.960791	1.16162	0.960201	0.973888	1.01413	0.845657	0.98869	1.05487	1.02808	0.979325	0.626168
K4C717	Uncharacterized protein OS=Solanum lycopersicum GN=Solyc06g062860.2 PE=4 SV=1 - [K4C717_SOLLC]	68.9914	5.43994	1.28	1	1.02985	1.05952	1.04929	0.972331	1.02775	1.12071	1.02955	0.970095	0.873484	0.99846	0.626456
M1C4X5	Uncharacterized protein OS=Solanum tuberosum GN=PGSC0003DMG400023317 PE=4 SV=1 - [M1C4X5_SOLTU]	90.8274	5.26221	1.11	1	1.06361	0.908224	1.10038	0.892979	0.991298	1.01965	1.11408	0.865802	1.13114	1.03267	0.626604
K4CEV0	Uncharacterized protein OS=Solanum lycopersicum GN=Solyc07g045440.1 PE=4 SV=1 - [K4CEV0_SOLLC]	31.1742	6.60986	2.77	1	0.990221	1.07707	0.98886	1.01896	1.01878	1.08239	0.93249	1.03973	0.929584	0.996048	0.627168
K4D5Q5	Uncharacterized protein OS=Solanum lycopersicum GN=Solyc11g010980.1 PE=3 SV=1 - [K4D5Q5_SOLLC]	32.7156	6.52197	2.34	1	0.851219	0.971394	0.936002	1.17179	0.9826	1.0553	0.890975	1.12611	1.03	1.02559	0.628357
M1B584	Uncharacterized protein OS=Solanum tuberosum GN=PGSC0003DMG400014406 PE=4 SV=1 - [M1B584_SOLTU]	44.2493	5.12256	1.74	1	1.03817	1.08037	0.911644	1.0297	1.01497	1.04262	0.863737	1.02552	1.01573	0.986901	0.62836
M1CKI9	Uncharacterized protein OS=Solanum tuberosum GN=PGSC0003DMG400027014 PE=3 SV=1 - [M1CKI9_SOLTU]	50.296	7.63525	13.02	5	1.01907	1.02773	0.980495	1.02488	1.01304	1.03106	1.01375	0.989394	1.0537	1.02198	0.628474
K4D4L7	Uncharacterized protein OS=Solanum lycopersicum GN=Solyc11g006040.1 PE=3 SV=1 - [K4D4L7_SOLLC]	101.947	6.04932	3.31	2	0.934118	1.03192	1.127	0.975605	1.01716	0.914077	1.0224	1.03467	0.995287	0.991608	0.628971
M1BLB0	Uncharacterized protein OS=Solanum tuberosum GN=PGSC0003DMG400018544 PE=3 SV=1 - [M1BLB0_SOLTU]	73.5651	5.21143	21.86	1	0.980591	0.960451	1.09167	0.89564	0.982089	1.0421	1.28918	0.89808	0.906941	1.03407	0.6293
M1CCL7	Uncharacterized protein OS=Solanum tuberosum GN=PGSC0003DMG400025098 PE=4 SV=1 - [M1CCL7_SOLTU]	41.6537	7.84033	5.7	2	1.01548	0.965951	1.21692	0.955977	1.03858	1.07585	1.08904	0.866136	0.960164	0.997797	0.630508
K4C9E8	Ribosomal protein OS=Solanum lycopersicum GN=Solyc06g074300.2 PE=3 SV=1 - [K4C9E8_SOLLC]	6.87774	9.81787	11.67	1	0.99441	1.06232	0.83457	1.06236	0.988415	1.06429	0.923499	1.04158	1.05293	1.02058	0.631034
K4DED3	Uncharacterized protein OS=Solanum lycopersicum GN=Solyc12g036790.1 PE=4 SV=1 - [K4DED3_SOLLC]	14.2404	8.79248	7.5	1	1.02184	1.05107	0.913775	0.987947	0.993658	1.10481	0.915867	1.0074	1.0471	1.01879	0.631282
K4BDF1	Uncharacterized protein OS=Solanum lycopersicum GN=Solyc02g093550.2 PE=4 SV=1 - [K4BDF1_SOLLC]	33.1052	9.08545	4.55	1	1.10642	0.943979	0.924515	1.09516	1.01752	1.05333	0.890747	0.974484	1.02935	0.986979	0.631886
M1C4X9	Uncharacterized protein OS=Solanum tuberosum GN=PGSC0003DMG400023321 PE=4 SV=1 - [M1C4X9_SOLTU]	37.125	5.46533	7.16	2	0.986086	1.09432	0.902396	1.05882	1.01041	0.929646	0.917352	1.02454	1.05894	0.982622	0.632076
K4BMJ4	Uncharacterized protein OS=Solanum lycopersicum GN=Solyc03g120450.2 PE=3 SV=1 - [K4BMJ4_SOLLC]	43.4691	6.25244	3.81	1	0.946883	0.799402	1.12124	1.08918	0.989177	0.968072	1.18221	1.00536	0.981762	1.03435	0.632361
K4DA30	Uncharacterized protein OS=Solanum lycopersicum GN=Solyc11g068730.1 PE=4 SV=1 - [K4DA30_SOLLC]	24.5514	5.41455	5.63	1	0.977874	0.971857	1.344	0.870199	1.04098	0.918368	1.08926	0.958644	0.968393	0.983667	0.632574
M1DL22	Uncharacterized protein OS=Solanum tuberosum GN=PGSC0003DMG400040303 PE=4 SV=1 - [M1DL22_SOLTU]	24.4539	9.11475	3.18	1	1.09446	1.1178	0.835377	1.04646	1.02352	1.08386	0.779682	1.06964	0.969105	0.975573	0.632688
M1AXK2	Uncharacterized protein OS=Solanum tuberosum GN=PGSC0003DMG400012492 PE=4 SV=1 - [M1AXK2_SOLTU]	70.3448	8.57275	3.18	2	0.910274	1.01522	1.35082	0.92593	1.05056	0.858969	1.03073	0.881377	1.17557	0.986662	0.63294
M1AD06	Uncharacterized protein OS=Solanum tuberosum GN=PGSC0003DMG400007791 PE=3 SV=1 - [M1AD06_SOLTU]	23.1266	7.35693	46.45	2	1.07507	1.03874	1.01103	0.980843	1.02642	1.13943	0.990176	0.951429	0.914714	0.998938	0.63308
M1CWD8	Uncharacterized protein OS=Solanum tuberosum GN=PGSC0003DMG400029633 PE=4 SV=1 - [M1CWD8_SOLTU]	109.022	5.33838	6.87	2	0.92353	1.08996	0.920631	1.12682	1.01524	1.01895	0.964122	0.990739	0.970361	0.986042	0.633275
M1CPW5	Proteasome subunit alpha type OS=Solanum tuberosum GN=PGSC0003DMG400028108 PE=3 SV=1 - [M1CPW5_SOLTU]	27.1037	6.53662	30.92	6	0.980851	1.04699	0.977298	0.976392	0.995382	0.966734	0.976251	1.00098	1.11671	1.01517	0.63339
Q2VEJ6	Photosystem Q(B) protein OS=Solanum tuberosum GN=psbA PE=3 SV=1 - [PSBA_SOLTU]	38.9255	5.24951	26.35	4	0.966223	0.888617	0.929434	1.08773	0.968001	0.792875	0.978081	1.18291	1.11501	1.01722	0.633432
M1BLC6	Uncharacterized protein OS=Solanum tuberosum GN=PGSC0003DMG400018556 PE=4 SV=1 - [M1BLC6_SOLTU]	24.3385	4.94482	14.68	3	0.97987	1.07112	0.858045	1.02476	0.983448	0.977837	0.976238	1.02178	1.06026	1.00903	0.634973
K4ATJ4	Peptidyl-prolyl cis-trans isomerase OS=Solanum lycopersicum GN=Solyc01g009990.2 PE=3 SV=1 - [K4ATJ4_SOLLC]	20.0113	8.86572	29.26	1	1.01089	1.07754	1.07519	0.99627	1.03997	1.12762	1.00988	1.0191	0.89799	1.01365	0.635034
K4CJL9	Uncharacterized protein OS=Solanum lycopersicum GN=Solyc08g021990.1 PE=4 SV=1 - [K4CJL9_SOLLC]	21.568	6.15088	17.37	1	0.962507	0.882548	1.16827	0.942644	0.988993	0.914148	1.08954	0.987479	1.1218	1.02824	0.635069
M0ZWP7	Uncharacterized protein OS=Solanum tuberosum GN=PGSC0003DMG400003765 PE=4 SV=1 - [M0ZWP7_SOLTU]	70.7586	4.729	5.75	3	0.965141	0.990757	1.03693	0.993849	0.996668	1.00739	1.23714	0.876113	1.02507	1.03643	0.635296
M1DZJ5	Uncharacterized protein OS=Solanum tuberosum GN=PGSC0003DMG400046503 PE=4 SV=1 - [M1DZJ5_SOLTU]	18.0096	6.15088	6.21	1	1.03047	1.11321	0.939566	0.970185	1.01336	0.988655	0.869002	1.04926	1.03502	0.985483	0.636629
K4B1M7	Uncharacterized protein OS=Solanum lycopersicum GN=Solyc01g103010.2 PE=4 SV=1 - [K4B1M7_SOLLC]	134.583	6.06201	3.29	4	0.972711	1.00255	0.908644	1.01123	0.973783	0.977862	0.886112	1.02951	1.10654	1.00001	0.636684
M1AIF8	Uncharacterized protein OS=Solanum tuberosum GN=PGSC0003DMG400009093 PE=4 SV=1 - [M1AIF8_SOLTU]	29.0593	8.86572	9.49	1	1.0554	1.08332	0.85657	1.04535	1.01016	0.931297	0.869991	1.04115	1.06114	0.975894	0.636906
B1Q480	Putative CONSTANS interacting protein 2b OS=Capsicum chinense PE=2 SV=1 - [B1Q480_CAPCH]	28.4242	6.20166	12.79	3	1.01261	0.963939	1.0209	0.946176	0.985907	0.903206	1.04012	0.982281	1.11771	1.01083	0.637384
K4BMV6	Uncharacterized protein OS=Solanum lycopersicum GN=Solyc03g121570.2 PE=4 SV=1 - [K4BMV6_SOLLC]	27.6769	6.53662	8.75	2	1.02129	0.966254	1.04755	0.985992	1.00527	0.980855	1.02095	0.972417	1.00429	0.994628	0.637568
M1A9W3	Uncharacterized protein OS=Solanum tuberosum GN=PGSC0003DMG400006994 PE=4 SV=1 - [M1A9W3_SOLTU]	8.44545	10.9604	10.71	1	0.870558	1.07839	1.16649	0.798412	0.978462	0.875772	1.20429	0.943194	1.11884	1.03552	0.637855
M0ZJY6	Uncharacterized protein OS=Solanum tuberosum GN=PGSC0003DMG400000892 PE=4 SV=1 - [M0ZJY6_SOLTU]	72.8761	7.79639	7.32	4	1.01625	0.969725	1.15991	0.949597	1.02387	1.07771	1.11413	0.930665	0.802953	0.981364	0.640457
K4CIK9	Uncharacterized protein OS=Solanum lycopersicum GN=Solyc08g007220.2 PE=4 SV=1 - [K4CIK9_SOLLC]	33.6856	8.39697	2.9	1	1.03297	1.22151	0.84458	0.992879	1.02298	1.06322	0.846353	1.03363	0.967536	0.977684	0.640789
M1C4U3	Uncharacterized protein OS=Solanum tuberosum GN=PGSC0003DMG400023281 PE=4 SV=1 - [M1C4U3_SOLTU]	32.9196	4.57666	8.58	2	0.965741	1.05008	1.23143	0.886819	1.03352	1.03211	1.09877	0.898388	0.932245	0.990377	0.641056
M1C8M3	Uncharacterized protein OS=Solanum tuberosum GN=PGSC0003DMG400024197 PE=4 SV=1 - [M1C8M3_SOLTU]	7.83206	9.53955	25	1	0.973451	0.960186	1.22404	1.00676	1.04111	1.03128	1.19455	0.878606	0.866301	0.992685	0.642048
M1AB98	Uncharacterized protein OS=Solanum tuberosum GN=PGSC0003DMG400007315 PE=4 SV=1 - [M1AB98_SOLTU]	64.32	9.27588	1.75	1	0.939208	0.878241	1.32112	1.00167	1.03506	0.937921	0.961759	0.984061	1.04966	0.983349	0.642109
M1A3D8	Uncharacterized protein OS=Solanum tuberosum GN=PGSC0003DMG400005409 PE=4 SV=1 - [M1A3D8_SOLTU]	47.6121	8.82178	7.24	3	0.995012	1.0694	0.857345	0.999221	0.980244	0.977937	0.893896	1.07839	1.09729	1.01188	0.642912
D3U716	Arogenate dehydratase 2 OS=Petunia hybrida GN=ADT2 PE=2 SV=1 - [D3U716_PETHY]	43.3974	7.1958	4.31	1	0.948069	0.919911	1.34458	0.941021	1.0384	0.975391	0.949063	0.938358	1.07475	0.98439	0.643035
Q9LKG0	Putative vacuolar proton ATPase subunit E (Fragment) OS=Solanum lycopersicum PE=2 SV=1 - [Q9LKG0_SOLLC]	27.1143	7.09326	21.1	5	1.02429	1.01827	0.915267	1.05203	1.00246	0.927165	0.89838	1.01709	1.06994	0.978143	0.643482
K4D7U2	Uncharacterized protein OS=Solanum lycopersicum GN=Solyc11g039650.1 PE=3 SV=1 - [K4D7U2_SOLLC]	99.6358	8.83643	9.58	8	0.976398	1.06894	1.01462	1.01191	1.01797	0.902841	1.0423	0.995713	1.05351	0.998591	0.643683
O24258	Enoyl-ACP reductase OS=Petunia hybrida GN=pte PE=4 SV=1 - [O24258_PETHY]	41.7726	8.04541	9.18	1	0.979262	1.14695	0.922184	1.00465	1.01326	0.96843	0.909164	1.00926	1.05449	0.985336	0.643815
K4DGZ2	Uncharacterized protein OS=Solanum lycopersicum GN=Solyc12g089210.1 PE=3 SV=1 - [K4DGZ2_SOLLC]	39.6692	7.25439	8.06	3	0.996235	0.992394	0.871073	1.05992	0.979905	0.935175	0.938101	1.14176	1.02676	1.01045	0.643824
G8Z286	Hop-interacting protein THI135 OS=Solanum lycopersicum GN=Solyc02g083290.2 PE=2 SV=1 - [G8Z286_SOLLC]	63.4782	5.65576	3.91	2	0.96672	0.979776	1.09756	1.02708	1.01778	0.920192	1.10441	0.933653	1.01167	0.992482	0.643981
K4BQ47	Uncharacterized protein OS=Solanum lycopersicum GN=Solyc04g015450.2 PE=3 SV=1 - [K4BQ47_SOLLC]	76.4527	7.62061	1.62	1	0.94868	0.832355	1.15693	1.03984	0.99445	1.08457	1.20363	0.95887	0.914967	1.04051	0.644287
M1D0M1	Uncharacterized protein OS=Solanum tuberosum GN=PGSC0003DMG400030633 PE=3 SV=1 - [M1D0M1_SOLTU]	61.6048	6.55127	11.5	5	1.00893	0.966241	1.04034	1.00488	1.0051	0.97957	1.03464	1.02086	1.02298	1.01451	0.645257
Q9LEG0	GDP dissociation inhibitor (Fragment) OS=Solanum lycopersicum GN=GDI1 PE=2 SV=1 - [Q9LEG0_SOLLC]	48.6974	5.47803	10.96	1	1.0583	1.12006	0.945912	0.799675	0.980985	0.988853	0.955251	1.11382	1.02032	1.01956	0.645747
K4AYE6	Uncharacterized protein OS=Solanum lycopersicum GN=Solyc01g087560.2 PE=4 SV=1 - [K4AYE6_SOLLC]	20.683	5.46533	7.22	1	1.01666	1.05437	1.02483	0.870545	0.991602	0.994992	1.2162	0.950445	0.95224	1.02847	0.645879
Q9M4D2	Chloroplast ferredoxin-NADP+ oxidoreductase OS=Capsicum annuum GN=fnr PE=1 SV=1 - [Q9M4D2_CAPAN]	33.8732	8.39697	17.33	1	1.03676	1.02527	0.934806	1.05345	1.01257	1.03874	0.904628	1.06949	0.946333	0.989797	0.646334
K4CN52	Uncharacterized protein OS=Solanum lycopersicum GN=Solyc08g076920.2 PE=4 SV=1 - [K4CN52_SOLLC]	31.0323	6.02393	3.08	1	1.16627	0.979675	0.899558	1.0069	1.0131	0.927675	0.962672	0.982259	1.05724	0.982462	0.646339
K4BLL7	Uncharacterized protein OS=Solanum lycopersicum GN=Solyc03g117150.2 PE=3 SV=1 - [K4BLL7_SOLLC]	98.5159	7.35693	14.65	1	0.947941	1.02767	0.907224	1.05752	0.985089	0.934451	0.942052	1.05787	1.11513	1.01237	0.646536
E0XN34	Alpha-mannosidase OS=Solanum lycopersicum GN=LOC100500729 PE=2 SV=1 - [E0XN34_SOLLC]	116.409	6.62451	4.57	2	0.994971	0.980495	1.02279	0.964536	0.990697	0.966935	0.922097	1.06334	1.09492	1.01182	0.646698
M0ZHT9	Uncharacterized protein OS=Solanum tuberosum GN=PGSC0003DMG400000398 PE=3 SV=1 - [M0ZHT9_SOLTU]	46.0624	6.354	13.94	1	1.02195	1.07771	0.885494	1.05491	1.01002	0.86995	0.953892	1.02109	1.07584	0.980193	0.646803
M1CKR4	Serine/threonine-protein phosphatase OS=Solanum tuberosum GN=PGSC0003DMG400027061 PE=3 SV=1 - [M1CKR4_SOLTU]	13.8216	5.05908	8.33	1	1.11534	0.911436	0.930154	1.09743	1.01359	0.99248	0.953417	0.969898	1.02665	0.985612	0.647647
M1AM61	Uncharacterized protein OS=Solanum tuberosum GN=PGSC0003DMG400009978 PE=4 SV=1 - [M1AM61_SOLTU]	89.1123	7.89893	1.52	1	0.974669	1.03175	1.00985	0.988225	1.00113	1.0747	0.9691	0.984801	1.02833	1.01423	0.647807
B3F8H7	Glucose-1-phosphate adenylyltransferase OS=Nicotiana langsdorffii x Nicotiana sanderae PE=2 SV=1 - [B3F8H7_NICLS]	57.092	6.63916	34.81	3	1.02044	0.921547	1.12821	0.962081	1.00807	1.07139	1.19321	0.980143	0.928837	1.0434	0.648117
M1D5C6	Lysine--tRNA ligase OS=Solanum tuberosum GN=PGSC0003DMG400032166 PE=3 SV=1 - [M1D5C6_SOLTU]	66.1907	6.23975	2.9	2	0.990295	0.977881	0.869879	1.12092	0.989744	1.09727	0.943714	1.01966	1.01519	1.01896	0.648281
M1BSN9	Uncharacterized protein OS=Solanum tuberosum GN=PGSC0003DMG400020198 PE=4 SV=1 - [M1BSN9_SOLTU]	20.806	8.35303	6.84	1	0.993679	0.892332	1.14395	0.921491	0.987863	0.924921	1.19991	0.908817	1.08988	1.03088	0.648473
K4AT27	Uncharacterized protein OS=Solanum lycopersicum GN=Solyc01g008290.2 PE=3 SV=1 - [K4AT27_SOLLC]	48.6867	9.29053	2.63	1	1.02278	1.12562	0.934222	0.965865	1.01212	0.982617	0.942219	0.998382	1.03474	0.98949	0.64871
M1BPR6	Uncharacterized protein OS=Solanum tuberosum GN=PGSC0003DMG400019449 PE=4 SV=1 - [M1BPR6_SOLTU]	19.5619	4.94482	4.55	1	1.02358	1.07402	0.926118	1.02923	1.01324	1.04529	0.914017	0.997043	1.01623	0.993144	0.649522
Q6QNU4	DNA damage-binding protein 1 OS=Solanum lycopersicum GN=DDB1 PE=1 SV=1 - [DDB1_SOLLC]	209.123	5.74463	1.51	3	0.954054	1.0628	0.949437	1.05765	1.00599	1.02651	0.955492	0.965986	1.00702	0.988751	0.65016
M1C3A1	Uncharacterized protein OS=Solanum tuberosum GN=PGSC0003DMG400022831 PE=4 SV=1 - [M1C3A1_SOLTU]	32.3373	6.37939	3.48	1	1.05637	0.988771	0.854171	1.06953	0.992209	1.07867	1.0132	0.98824	0.993369	1.01837	0.650278
P93570	Chaperonin-60 beta subunit OS=Solanum tuberosum PE=2 SV=1 - [P93570_SOLTU]	6.93851	5.0083	15	1	0.897126	0.869587	1.05678	1.15283	0.99408	1.05603	1.12412	0.961132	0.983042	1.03108	0.65106
P30171	Actin-97 OS=Solanum tuberosum GN=AC97 PE=1 SV=1 - [ACT11_SOLTU]	41.6159	5.49072	37.93	1	0.995185	0.970995	1.28532	0.924717	1.04405	1.1618	1.07513	0.906378	0.817781	0.990272	0.651355
K4C9I3	Uncharacterized protein OS=Solanum lycopersicum GN=Solyc06g074650.2 PE=4 SV=1 - [K4C9I3_SOLLC]	113.294	6.17627	1.67	2	0.989032	1.01853	0.986072	1.00813	1.00044	0.965998	1.01249	1.04769	1.01131	1.00937	0.652407
F8UTT8	Tetraspanin-like protein OS=Solanum demissum PE=4 SV=1 - [F8UTT8_SOLDE]	9.62287	7.04932	9.2	1	0.986016	1.0766	0.937144	0.989063	0.997205	0.995514	1.00129	1.0586	0.996557	1.01299	0.652426
M1A2P0	Uncharacterized protein OS=Solanum tuberosum GN=PGSC0003DMG400005200 PE=4 SV=1 - [M1A2P0_SOLTU]	9.06483	9.78857	12.82	1	1.00885	1.10035	0.980823	0.965639	1.01392	0.92634	1.0372	0.911986	1.0822	0.989432	0.652683
M1AFW0	Uncharacterized protein OS=Solanum tuberosum GN=PGSC0003DMG400008501 PE=4 SV=1 - [M1AFW0_SOLTU]	6.10584	4.28467	12.96	1	0.995368	1.06115	0.79788	1.02177	0.969041	0.954155	0.821983	1.18308	1.10488	1.01602	0.654602
K4AYA3	Uncharacterized protein OS=Solanum lycopersicum GN=Solyc01g087120.2 PE=3 SV=1 - [K4AYA3_SOLLC]	19.6505	9.5249	8.89	1	1.0602	1.10688	0.822222	1.06914	1.01461	0.98192	0.865437	1.02482	1.04159	0.978441	0.654751
M0ZM59	Uncharacterized protein OS=Solanum tuberosum GN=PGSC0003DMG400001455 PE=4 SV=1 - [M0ZM59_SOLTU]	34.695	8.57275	6.33	2	0.986468	0.988515	1.00925	0.995361	0.994897	1.13057	0.937404	1.038	0.960314	1.01657	0.655067
M1BIY5	Uncharacterized protein OS=Solanum tuberosum GN=PGSC0003DMG400017984 PE=3 SV=1 - [M1BIY5_SOLTU]	17.5125	10.1401	10.13	1	0.950162	0.926653	1.06431	1.03021	0.992833	0.913767	1.09548	0.99546	1.06413	1.01721	0.655301
M1AF31	Uncharacterized protein OS=Solanum tuberosum GN=PGSC0003DMG400008307 PE=4 SV=1 - [M1AF31_SOLTU]	19.2072	8.44092	12.22	2	1.03615	0.954894	1.01991	1.04153	1.01312	0.928777	1.07096	1.03022	0.948249	0.994551	0.655399
I3NT12	Photosystem II subunit H (Fragment) OS=Petunia axillaris GN=psbH PE=4 SV=1 - [I3NT12_9SOLA]	3.46177	9.70068	81.25	2	0.876109	1.00322	0.972694	1.08192	0.983485	1.31729	1.03209	0.909207	0.883209	1.03545	0.655531
K4ASY6	Uncharacterized protein OS=Solanum lycopersicum GN=Solyc01g007880.2 PE=4 SV=1 - [K4ASY6_SOLLC]	86.3484	5.46533	1.28	1	1.05277	0.93704	0.83678	1.11971	0.986577	1.08173	0.95796	1.04384	0.993769	1.01932	0.6559
M1CLU3	Uncharacterized protein OS=Solanum tuberosum GN=PGSC0003DMG400027291 PE=3 SV=1 - [M1CLU3_SOLTU]	50.2866	6.40479	7.57	2	0.970548	0.988926	1.04148	0.971178	0.993033	0.956004	0.997346	0.984314	1.10379	1.01036	0.656001
M1ABY8	Uncharacterized protein OS=Solanum tuberosum GN=PGSC0003DMG400007488 PE=4 SV=1 - [M1ABY8_SOLTU]	38.0402	5.52881	5.46	2	0.895416	0.983385	1.15032	0.936697	0.991455	1.01858	1.16237	0.947745	0.97456	1.02581	0.657333
K4BW77	Uncharacterized protein OS=Solanum lycopersicum GN=Solyc05g005460.2 PE=4 SV=1 - [K4BW77_SOLLC]	66.4008	4.91943	4.82	3	0.958283	0.972504	0.922076	1.05608	0.977235	0.856504	0.96609	1.08266	1.13353	1.00969	0.657378
P59702	Cytochrome b559 subunit alpha OS=Atropa belladonna GN=psbE PE=3 SV=3 - [PSBE_ATRBE]	2.65433	4.4624	91.3	1	1.05079	0.992228	0.961064	1.01448	1.00464	0.990076	0.941678	1.04493	0.989039	0.991431	0.657599
K4BHY1	Uncharacterized protein OS=Solanum lycopersicum GN=Solyc03g080050.2 PE=4 SV=1 - [K4BHY1_SOLLC]	19.3531	9.75928	11.67	1	0.954019	1.12472	1.10624	0.944168	1.03229	1.04827	1.14438	0.896831	0.894483	0.99599	0.6585
M1A9K6	Uncharacterized protein OS=Solanum tuberosum GN=PGSC0003DMG400006931 PE=4 SV=1 - [M1A9K6_SOLTU]	14.685	6.78564	8.57	1	0.986783	1.03012	1.15278	0.940873	1.02764	1.09073	0.886995	1.09384	0.903074	0.99366	0.658707
M0ZTJ2	Ubiquitin carboxyl-terminal hydrolase OS=Solanum tuberosum GN=PGSC0003DMG402003010 PE=3 SV=1 - [M0ZTJ2_SOLTU]	130.025	5.65576	2.62	3	1.07514	0.969642	1.15688	0.907811	1.02737	1.15656	1.0943	0.92571	0.723008	0.974894	0.659329
K4D919	Uncharacterized protein OS=Solanum lycopersicum GN=Solyc11g062070.1 PE=4 SV=1 - [K4D919_SOLLC]	75.9377	8.07471	1.29	1	1.11304	0.939922	1.08747	0.938798	1.01981	1.03775	0.968559	1.01123	0.966565	0.996026	0.659335
K4BCZ7	Uncharacterized protein OS=Solanum lycopersicum GN=Solyc02g092000.2 PE=4 SV=1 - [K4BCZ7_SOLLC]	19.7945	9.21729	7.78	1	0.97761	0.972988	1.25308	0.934199	1.03447	0.843797	1.20242	0.96015	0.934944	0.985327	0.659712
P09003	ATP synthase protein MI25 OS=Nicotiana tabacum PE=2 SV=1 - [MI25_TOBAC]	22.4218	9.37842	17.68	4	0.957008	0.974415	1.07915	1.15673	1.04183	1.08297	1.11378	0.944202	0.895542	1.00912	0.65988
K4APV4	Uncharacterized protein OS=Solanum lycopersicum GN=Solyc00g007010.2 PE=4 SV=1 - [K4APV4_SOLLC]	66.3771	7.41553	1.55	1	0.977442	0.983119	1.12431	0.985922	1.0177	0.949589	1.04821	0.942747	1.0454	0.996486	0.661295
M1B535	Uncharacterized protein OS=Solanum tuberosum GN=PGSC0003DMG400014378 PE=3 SV=1 - [M1B535_SOLTU]	20.5719	9.0415	12.77	3	1.00023	1.10197	0.93508	0.999154	1.00911	0.940335	0.957455	1.09268	0.954587	0.986263	0.66146
M0ZWC5	Uncharacterized protein OS=Solanum tuberosum GN=PGSC0003DMG400003700 PE=4 SV=1 - [M0ZWC5_SOLTU]	42.7979	6.80029	4.3	1	0.954103	0.983032	0.97615	1.02199	0.983819	0.944615	0.881251	1.10773	1.11827	1.01297	0.661744
K4AXB5	Uncharacterized protein OS=Solanum lycopersicum GN=Solyc01g073690.2 PE=4 SV=1 - [K4AXB5_SOLLC]	27.4588	9.53955	25.2	4	1.05472	1.02661	0.866283	0.967302	0.97873	0.925865	0.905404	1.05834	1.15973	1.01233	0.66249
B3F8I0	Glyceraldehyde 3-phosphate dehydrogenase OS=Nicotiana langsdorffii x Nicotiana sanderae PE=1 SV=1 - [B3F8I0_NICLS]	36.9981	7.10791	47.06	1	0.964954	1.07838	1.01361	0.85079	0.976934	0.811002	1.03526	1.01614	1.22623	1.02216	0.663336
M1A442	Uncharacterized protein OS=Solanum tuberosum GN=PGSC0003DMG401005640 PE=3 SV=1 - [M1A442_SOLTU]	12.5799	10.0083	14.53	2	0.945341	1.12464	0.890977	0.866768	0.956931	1.01648	0.953784	1.00498	0.966884	0.985531	0.663439
P27082	Superoxide dismutase [Cu-Zn] OS=Nicotiana plumbaginifolia GN=SODCC PE=2 SV=2 - [SODC_NICPL]	128.558	5.88428	10.49	5	1.02971	1.00451	0.952774	0.986853	0.993462	1.00088	0.975088	0.971408	1.08295	1.00758	0.66367
M1CYM7	Uncharacterized protein OS=Solanum tuberosum GN=PGSC0003DMG400030187 PE=4 SV=1 - [M1CYM7_SOLTU]	134.4	5.42725	3.63	4	0.951616	0.977953	1.29205	0.923388	1.03625	1.11662	1.10605	0.880186	0.834732	0.984398	0.663877
K4AY75	Histone H3 OS=Solanum lycopersicum GN=Solyc01g086820.2 PE=3 SV=1 - [K4AY75_SOLLC]	69.2675	6.12549	1.96	1	1.01117	0.966806	1.18466	0.979465	1.03552	1.07761	1.11198	0.972176	0.83269	0.998615	0.663947
Q947H2	Ribosomal protein OS=Petunia hybrida GN=PETRP PE=2 SV=1 - [Q947H2_PETHY]	20.0175	10.228	24	1	0.943354	1.10725	0.950974	0.953468	0.988761	1.13642	0.866281	1.12635	0.966791	1.02396	0.664561
A9NIW4	Putative sucrose transport protein SUT1 (Fragment) OS=Nicotiana langsdorffii x Nicotiana sanderae PE=2 SV=1 - [A9NIW4_NICLS]	16.9759	9.65674	6.25	1	1.07048	1.01235	0.93849	1.01245	1.00844	0.954812	0.893355	1.07045	1.02806	0.986671	0.665662
M1BA84	Uncharacterized protein OS=Solanum tuberosum GN=PGSC0003DMG400015731 PE=4 SV=1 - [M1BA84_SOLTU]	47.0129	5.85889	13.08	1	0.979735	0.955438	0.893593	1.09706	0.981457	0.963398	0.910142	1.09421	1.06861	1.00909	0.66569
K4C7K0	Uncharacterized protein OS=Solanum lycopersicum GN=Solyc06g065710.2 PE=4 SV=1 - [K4C7K0_SOLLC]	102.081	6.02393	1.28	1	0.903971	0.998361	1.1857	0.856034	0.986017	0.903299	1.12822	1.03529	1.03529	1.02553	0.665923
M1C547	Uncharacterized protein OS=Solanum tuberosum GN=PGSC0003DMG400023359 PE=4 SV=1 - [M1C547_SOLTU]	27.1508	5.21143	6.38	1	0.980583	0.964407	1.02928	1.03343	1.00192	1.00215	1.15993	0.896029	1.05782	1.02898	0.66625
M1BR77	Uncharacterized protein OS=Solanum tuberosum GN=PGSC0003DMG400019823 PE=4 SV=1 - [M1BR77_SOLTU]	51.2009	6.56592	7.99	3	1.07182	0.919573	0.890578	1.17775	1.01493	1.00523	0.861532	1.02588	1.02457	0.979302	0.667677
K4D7D1	Uncharacterized protein OS=Solanum lycopersicum GN=Solyc11g027880.1 PE=4 SV=1 - [K4D7D1_SOLLC]	56.0549	5.13525	6.94	3	1.00042	0.986077	0.941229	1.03521	0.990733	0.946061	0.959477	1.09528	1.03503	1.00896	0.667848
I7GUL1	Riboflavin synthase (Fragment) OS=Hyoscyamus albus GN=HaRibD PE=2 SV=1 - [I7GUL1_9SOLA]	31.8358	6.21436	4.91	1	0.979085	0.901362	1.10419	0.996055	0.995173	0.945342	1.0832	1.01984	1.02375	1.01803	0.668408
M1A0V9	Uncharacterized protein OS=Solanum tuberosum GN=PGSC0003DMG400004781 PE=4 SV=1 - [M1A0V9_SOLTU]	45.1979	5.0083	5.24	1	1.02433	1.06667	0.908216	1.05327	1.01312	0.989833	0.856854	1.10445	0.989052	0.985047	0.668941
M1A357	Uncharacterized protein OS=Solanum tuberosum GN=PGSC0003DMG400005339 PE=4 SV=1 - [M1A357_SOLTU]	55.8254	5.45264	2.19	1	1.02626	0.96	1.13476	0.88295	1.00099	0.913257	0.887864	1.05784	1.02387	0.970708	0.670524
K4BP97	Proteasome subunit beta type OS=Solanum lycopersicum GN=Solyc04g009410.2 PE=3 SV=1 - [K4BP97_SOLLC]	13.748	8.00146	7.5	1	0.924019	1.12949	0.977642	1.01587	1.01176	0.909452	0.931006	1.05273	1.05027	0.985864	0.670612
K4BVU1	Uncharacterized protein OS=Solanum lycopersicum GN=Solyc04g082140.2 PE=4 SV=1 - [K4BVU1_SOLLC]	40.4636	8.29443	4.44	1	1.08277	0.968644	0.843798	1.04275	0.984491	0.981244	0.957281	1.12436	0.990696	1.0134	0.671908
M1AD30	Uncharacterized protein OS=Solanum tuberosum GN=PGSC0003DMG400007807 PE=3 SV=1 - [M1AD30_SOLTU]	29.4326	4.70361	20.08	2	0.9622	0.864547	1.08065	0.975096	0.970623	0.990088	1.28729	0.909516	0.882234	1.01728	0.67208
M1AHN5	Uncharacterized protein OS=Solanum tuberosum GN=PGSC0003DMG400008917 PE=3 SV=1 - [M1AHN5_SOLTU]	65.104	5.45264	29.71	2	0.990705	0.948409	1.2146	0.926342	1.02001	1.02957	1.12188	0.889374	0.883066	0.980972	0.67292
Q6XP48	UDP-Glc-4-epimerase OS=Solanum tuberosum GN=StUGE51 PE=2 SV=1 - [Q6XP48_SOLTU]	39.19	7.18115	7.41	2	1.04244	0.954655	1.04638	0.957712	1.0003	1.0333	1.05318	1.00576	0.965391	1.01441	0.673957
M1D2J3	Uncharacterized protein OS=Solanum tuberosum GN=PGSC0003DMG400031093 PE=3 SV=1 - [M1D2J3_SOLTU]	25.53	6.15088	12.27	1	1.05975	1.05239	0.835863	1.09695	1.01124	0.846528	0.815652	1.0946	1.11311	0.967471	0.67456
F2Z9R1	Glucose-6-phosphate 1-dehydrogenase OS=Nicotiana benthamiana GN=NbG6PDH-Cyto PE=2 SV=1 - [F2Z9R1_NICBE]	58.5521	6.49365	14.87	1	1.07862	1.05107	0.76772	1.15915	1.01414	0.921223	0.858321	0.988209	1.11019	0.969485	0.67627
K4BK46	Uncharacterized protein OS=Solanum lycopersicum GN=Solyc03g111850.2 PE=3 SV=1 - [K4BK46_SOLLC]	38.6105	8.60205	2.85	1	0.984866	1.08712	0.898606	1.07374	1.01108	0.948811	0.971239	0.980917	1.05527	0.989059	0.676927
M1BWV7	Uncharacterized protein OS=Solanum tuberosum GN=PGSC0003DMG400021264 PE=3 SV=1 - [M1BWV7_SOLTU]	110.213	5.84619	17.32	2	1.01026	0.877415	1.16042	0.993808	1.01048	1.05458	1.20079	0.887692	1.04982	1.04822	0.677609
M0ZT88	Uncharacterized protein OS=Solanum tuberosum GN=PGSC0003DMG400002929 PE=3 SV=1 - [M0ZT88_SOLTU]	26.8114	8.88037	11.11	3	0.986864	1.00276	0.874455	1.08895	0.988258	1.09613	0.956159	1.02957	0.966985	1.01221	0.677805
M1D7X5	Uncharacterized protein OS=Solanum tuberosum GN=PGSC0003DMG400034309 PE=4 SV=1 - [M1D7X5_SOLTU]	20.4153	5.94775	4.06	1	1.01411	1.12643	0.820703	0.95377	0.978755	1.0794	0.841835	1.17156	0.987805	1.02015	0.677922
B0CN61	Myosin XI-K OS=Nicotiana benthamiana PE=2 SV=1 - [B0CN61_NICBE]	151.864	8.35303	1.85	2	1.00139	0.88957	1.21296	0.844647	0.987142	1.03421	1.22255	1.02922	0.856371	1.03559	0.678205
K4C8F3	Uncharacterized protein OS=Solanum lycopersicum GN=Solyc06g069810.1 PE=4 SV=1 - [K4C8F3_SOLLC]	26.9511	9.0415	3.28	1	0.890619	0.941279	0.998536	1.11959	0.987506	0.93925	0.953135	1.09339	1.07495	1.01518	0.67884
M1CWL7	Eukaryotic translation initiation factor 3 subunit D OS=Solanum tuberosum GN=PGSC0003DMG400029694 PE=3 SV=1 - [M1CWL7_SOLTU]	65.3906	5.61768	1.56	1	1.00527	1.07942	0.83804	1.03359	0.989081	1.01869	0.985919	1.04577	1.00383	1.01355	0.678865
M1C5Y4	Uncharacterized protein OS=Solanum tuberosum GN=PGSC0003DMG400023524 PE=4 SV=1 - [M1C5Y4_SOLTU]	38.745	7.54736	17.49	3	0.997714	0.942704	1.0994	0.915227	0.988762	0.952858	1.21166	0.89289	1.03905	1.02412	0.679009
M1C6E5	Uncharacterized protein OS=Solanum tuberosum GN=PGSC0003DMG400023637 PE=4 SV=1 - [M1C6E5_SOLTU]	12.1905	9.84717	7.14	1	1.08594	0.978422	0.995365	1.00735	1.01677	1.04053	1.04646	0.999524	0.912717	0.999807	0.679507
K4BY93	Uncharacterized protein OS=Solanum lycopersicum GN=Solyc05g013720.2 PE=4 SV=1 - [K4BY93_SOLLC]	57.2395	8.30908	1.37	1	1.15684	0.912175	1.12903	0.917973	1.02901	1.11424	0.902512	0.892103	1.05725	0.991527	0.679919
Q42658	Dimethylallyltransferase OS=Capsicum annuum PE=2 SV=1 - [Q42658_CAPAN]	39.515	5.41455	12.57	3	0.97472	0.966801	0.888652	1.17132	1.00037	1.01695	0.994778	1.01688	1.08628	1.02872	0.680021
M1ADY5	Uncharacterized protein OS=Solanum tuberosum GN=PGSC0003DMG400008018 PE=4 SV=1 - [M1ADY5_SOLTU]	10.0552	9.5835	9.41	1	1.10568	1.09583	0.929193	0.947183	1.01947	0.99372	0.932611	1.02921	1.03006	0.996401	0.680675
K4CJ79	Uncharacterized protein OS=Solanum lycopersicum GN=Solyc08g014480.2 PE=4 SV=1 - [K4CJ79_SOLLC]	125.495	5.74463	2.07	3	1.02359	0.93992	1.0176	0.9957	0.994201	1.08581	0.955483	1.05028	0.952967	1.01114	0.68069
K4DCC6	Uncharacterized protein OS=Solanum lycopersicum GN=Solyc12g010390.1 PE=4 SV=1 - [K4DCC6_SOLLC]	33.4036	5.13525	3.37	1	1.01702	1.01418	0.838471	1.19285	1.01563	0.886652	0.931887	1.14465	0.939381	0.975643	0.681146
K4B3J1	Uncharacterized protein OS=Solanum lycopersicum GN=Solyc01g109780.2 PE=4 SV=1 - [K4B3J1_SOLLC]	72.8684	8.86572	0.91	1	0.933529	0.92497	1.19814	1.06171	1.02959	0.915406	0.895065	1.2551	0.857832	0.980852	0.68148
M1C6I0	Uncharacterized protein OS=Solanum tuberosum GN=PGSC0003DMG400023661 PE=3 SV=1 - [M1C6I0_SOLTU]	64.6433	6.22705	3.45	1	1.08642	0.998128	1.04431	0.964648	1.02338	1.16535	0.992052	1.00977	0.776686	0.985963	0.681796
K4DBP0	Uncharacterized protein OS=Solanum lycopersicum GN=Solyc12g007030.1 PE=3 SV=1 - [K4DBP0_SOLLC]	46.4917	5.32568	1.9	1	1.01259	1.05807	0.849395	1.01549	0.983886	0.997883	0.897369	1.13067	1.02401	1.01248	0.681954
M1D2M8	Uncharacterized protein OS=Solanum tuberosum GN=PGSC0003DMG400031113 PE=4 SV=1 - [M1D2M8_SOLTU]	29.2471	6.22705	4.29	1	1.03655	0.948897	1.05914	0.933478	0.994517	0.933111	1.0598	0.993205	1.06856	1.01367	0.68217
F8WQS3	Ascorbate peroxidase (Fragment) OS=Nicotiana benthamiana GN=APX PE=2 SV=1 - [F8WQS3_NICBE]	21.0596	5.021	30.73	2	1.05718	0.902361	1.01503	1.01122	0.996448	0.979291	1.03493	0.991873	1.04385	1.01249	0.682716
O49996	14-3-3-like protein D OS=Nicotiana tabacum PE=2 SV=1 - [1433D_TOBAC]	27.1619	4.98291	23.33	1	0.935492	0.950055	1.23692	0.980194	1.02566	0.944126	1.0977	0.917823	1.00155	0.9903	0.683257
M1AH87	Uncharacterized protein OS=Solanum tuberosum GN=PGSC0003DMG400008847 PE=4 SV=1 - [M1AH87_SOLTU]	137.592	6.01123	7.1	7	1.02193	0.975561	1.1892	0.895378	1.02052	0.960542	1.087	0.956824	0.956034	0.9901	0.683533
K4C5Y9	Uncharacterized protein OS=Solanum lycopersicum GN=Solyc06g052030.2 PE=4 SV=1 - [K4C5Y9_SOLLC]	86.6672	4.64014	1.15	1	0.898583	0.976563	1.12067	1.00211	0.99948	1.0245	1.16387	0.966051	0.957025	1.02786	0.683547
M9WMF1	PIB01 14-3-3 protein (Fragment) OS=Petunia hybrida PE=2 SV=1 - [M9WMF1_PETHY]	16.3262	5.42725	56.34	2	1.07549	0.972664	1.17777	0.945835	1.04294	1.01921	1.17524	0.907221	0.932473	1.00854	0.683906
Q40532	Mitogen-activated protein kinase homolog NTF4 OS=Nicotiana tabacum GN=NTF4 PE=2 SV=1 - [NTF4_TOBAC]	45.0907	5.93506	10.18	2	1.05474	0.959114	1.04938	0.973748	1.00925	0.925799	0.941899	0.978339	1.10807	0.988526	0.685861
P50217	Isocitrate dehydrogenase [NADP] OS=Solanum tuberosum GN=ICDH-1 PE=2 SV=1 - [IDHC_SOLTU]	46.7618	6.99072	27.16	1	1.02054	0.961259	0.995196	1.0541	1.00777	0.83496	0.936954	1.0153	1.12945	0.979166	0.686161
M1CKQ7	Uncharacterized protein OS=Solanum tuberosum GN=PGSC0003DMG400027053 PE=4 SV=1 - [M1CKQ7_SOLTU]	23.3952	8.90967	4.76	1	1.08763	1.02113	0.948613	1.00276	1.01503	1.08245	0.947673	1.04095	0.903372	0.993611	0.686274
K4CHY4	Phosphoglycerate kinase OS=Solanum lycopersicum GN=Solyc07g066610.2 PE=3 SV=1 - [K4CHY4_SOLLC]	19.0233	10.0522	31.67	3	1.00198	0.973041	1.17616	0.931977	1.02079	0.956838	1.16308	0.950477	0.873741	0.986033	0.686826
K4CHA9	Uncharacterized protein OS=Solanum lycopersicum GN=Solyc07g064280.2 PE=3 SV=1 - [K4CHA9_SOLLC]	29.9006	9.14404	7.25	1	1.01992	0.982777	0.876459	1.08413	0.990821	1.08763	0.916967	1.07824	0.981382	1.01605	0.687114
M1AJ37	Uncharacterized protein OS=Solanum tuberosum GN=PGSC0003DMG400009235 PE=4 SV=1 - [M1AJ37_SOLTU]	28.324	6.85889	3.91	1	0.991554	0.941007	0.912054	1.11183	0.989111	1.03386	0.901144	1.11422	1.01238	1.0154	0.687465
K4CL75	Uncharacterized protein OS=Solanum lycopersicum GN=Solyc08g062920.2 PE=4 SV=1 - [K4CL75_SOLLC]	25.6528	7.72314	28.95	1	1.00809	1.05679	0.923084	0.970559	0.989632	1.06811	1.05356	0.997367	0.915247	1.00857	0.687525
J9YIZ4	Cinnamoyl-CoA hydratase-dehydrogenase OS=Petunia hybrida GN=CHD PE=2 SV=1 - [J9YIZ4_PETHY]	77.5222	9.1001	7.78	6	1.00884	1.04493	0.969679	0.994746	1.00455	0.984178	0.992569	0.985337	1.02482	0.996727	0.688362
K4B4Z2	Uncharacterized protein OS=Solanum lycopersicum GN=Solyc02g021420.2 PE=4 SV=1 - [K4B4Z2_SOLLC]	108.879	5.88428	1.85	1	1.00378	1.03798	0.956777	1.03374	1.00807	0.953368	0.905756	1.08696	1.01182	0.989475	0.688384
M1BYI3	Uncharacterized protein OS=Solanum tuberosum GN=PGSC0003DMG402021662 PE=4 SV=1 - [M1BYI3_SOLTU]	53.4647	6.12549	4.55	1	1.05594	0.810351	1.18356	1.04925	1.02477	0.978638	0.866944	1.06668	1.03472	0.986743	0.68914
K4D2Y4	Uncharacterized protein OS=Solanum lycopersicum GN=Solyc10g080970.1 PE=3 SV=1 - [K4D2Y4_SOLLC]	19.3965	6.68311	6.67	1	0.970178	0.911612	0.912485	1.17296	0.99181	1.07943	0.948321	1.06368	0.993778	1.0213	0.689582
M1BGZ4	Uncharacterized protein OS=Solanum tuberosum GN=PGSC0003DMG400017459 PE=3 SV=1 - [M1BGZ4_SOLTU]	34.6412	9.14404	8.54	2	1.02057	1.00335	0.814909	1.10713	0.986489	1.06476	0.956933	1.07158	0.969876	1.01579	0.689606
K4BBP7	Uncharacterized protein OS=Solanum lycopersicum GN=Solyc02g087400.1 PE=4 SV=1 - [K4BBP7_SOLLC]	41.4767	4.56396	4.62	2	0.982772	1.02105	0.99377	1.0085	1.00152	1.07779	1.00456	1.02232	0.949433	1.01353	0.689931
K4B1V5	40S ribosomal protein S12 OS=Solanum lycopersicum GN=Solyc01g103800.2 PE=3 SV=1 - [K4B1V5_SOLLC]	6.13723	6.78564	11.67	1	1.01475	1.17186	0.809843	1.08423	1.02017	1.10067	0.863441	1.01149	0.949868	0.981366	0.689996
K4CS35	Uncharacterized protein OS=Solanum lycopersicum GN=Solyc09g015650.2 PE=4 SV=1 - [K4CS35_SOLLC]	31.7005	5.56689	2.42	1	1.06034	1.03004	0.870751	1.0897	1.01271	0.997074	0.832992	1.06834	1.03303	0.982859	0.690421
M0ZKR0	Uncharacterized protein OS=Solanum tuberosum GN=PGSC0003DMG400001104 PE=4 SV=1 - [M0ZKR0_SOLTU]	66.676	7.21045	17.48	5	0.99044	0.989288	1.26254	0.929882	1.04304	0.969038	1.21596	0.899051	0.912758	0.999203	0.690571
K4BDP2	Phosphorus transporter OS=Solanum lycopersicum GN=Solyc02g094470.2 PE=2 SV=1 - [K4BDP2_SOLLC]	38.4158	9.11475	18.44	6	0.997663	0.975454	0.863552	1.09058	0.981813	0.924534	0.892056	1.11992	1.12018	1.01417	0.690627
M0ZJV9	Uncharacterized protein OS=Solanum tuberosum GN=PGSC0003DMG400000874 PE=4 SV=1 - [M0ZJV9_SOLTU]	21.2942	9.40771	6.15	1	0.957109	0.914756	1.09102	1.11992	1.0207	0.962367	1.07087	1.03771	0.907626	0.994642	0.69079
C0LIR4	Sulfurtransferase OS=Solanum lycopersicum GN=MST1 PE=2 SV=1 - [C0LIR4_SOLLC]	40.9228	7.86963	9.16	1	1.0107	0.927017	1.16653	0.966626	1.01772	0.863673	1.0276	1.03774	1.0296	0.989652	0.691579
K4BJE6	Uncharacterized protein OS=Solanum lycopersicum GN=Solyc03g097290.2 PE=3 SV=1 - [K4BJE6_SOLLC]	110.797	6.37939	9.8	9	1.02197	0.980888	0.951254	0.9763	0.982604	1.02769	0.962267	1.01673	0.961793	0.99212	0.691801
M1A1E3	Uncharacterized protein OS=Solanum tuberosum GN=PGSC0003DMG400004899 PE=4 SV=1 - [M1A1E3_SOLTU]	53.429	5.63037	14.37	3	0.947746	1.00498	1.03534	0.945985	0.983512	0.930482	1.31196	0.882752	0.981336	1.02663	0.692
M0ZKH7	Uncharacterized protein OS=Solanum tuberosum GN=PGSC0003DMG400001041 PE=4 SV=1 - [M0ZKH7_SOLTU]	6.43944	7.18115	16.67	1	0.921228	0.919813	1.06995	1.03895	0.987487	0.928388	0.957443	0.997668	1.1818	1.01632	0.692878
K4BKR7	Uncharacterized protein OS=Solanum lycopersicum GN=Solyc03g114150.2 PE=3 SV=1 - [K4BKR7_SOLLC]	38.4549	8.35303	10.14	2	1.06362	1.1272	0.820075	1.01979	1.00767	0.859988	0.908779	1.08321	1.03834	0.972581	0.693747
K4CYF5	Uncharacterized protein OS=Solanum lycopersicum GN=Solyc10g011770.2 PE=4 SV=1 - [K4CYF5_SOLLC]	18.1164	7.23975	6.51	2	1.10593	1.03067	0.839673	1.09896	1.01881	0.850146	0.801794	1.20425	1.03428	0.972617	0.69377
M1ASK9	Uncharacterized protein OS=Solanum tuberosum GN=PGSC0003DMG400011264 PE=4 SV=1 - [M1ASK9_SOLTU]	38.8231	5.43994	9.94	2	0.985252	1.05158	0.974574	1.05762	1.01726	1.04985	0.992116	1.05426	0.904438	1.00017	0.694776
K4CET0	Uncharacterized protein OS=Solanum lycopersicum GN=Solyc07g045230.2 PE=4 SV=1 - [K4CET0_SOLLC]	92.7703	7.15186	1.26	1	0.945922	1.07146	1.02755	1.00529	1.01256	0.9817	1.04385	0.986599	0.988191	1.00008	0.695386
M1A029	Uncharacterized protein OS=Solanum tuberosum GN=PGSC0003DMG400004609 PE=4 SV=1 - [M1A029_SOLTU]	45.5068	5.5542	9.16	1	0.938097	1.07612	1.0331	1.03913	1.02161	1.134	0.927395	0.985638	0.948511	0.998885	0.697007
K4D8F6	Uncharacterized protein OS=Solanum lycopersicum GN=Solyc11g044910.1 PE=4 SV=1 - [K4D8F6_SOLLC]	83.7773	8.104	2.33	1	0.854279	1.00201	1.26644	0.856968	0.994925	1.00155	1.17948	1.00067	0.977158	1.03971	0.697096
M0ZSJ5	Uncharacterized protein OS=Solanum tuberosum GN=PGSC0003DMG400002765 PE=4 SV=1 - [M0ZSJ5_SOLTU]	62.2614	8.14795	4.16	2	0.978772	1.04482	0.989147	1.01525	1.007	0.911743	1.01914	1.02249	1.02308	0.994115	0.698075
M1CBY6	Uncharacterized protein OS=Solanum tuberosum GN=PGSC0003DMG400024951 PE=3 SV=1 - [M1CBY6_SOLTU]	22.8606	5.63037	8.82	2	1.13184	0.929583	1.01564	0.98606	1.01578	0.90986	1.04374	1.0379	0.985643	0.994287	0.698838
Q9AXQ3	Eukaryotic translation initiation factor 5A-4 OS=Solanum lycopersicum PE=2 SV=1 - [IF5A4_SOLLC]	10.9434	4.55127	38	1	0.992079	1.09268	0.836285	1.01574	0.984196	0.954973	0.941958	1.02556	1.12538	1.01197	0.698985
M1CJU6	Uncharacterized protein OS=Solanum tuberosum GN=PGSC0003DMG400026857 PE=4 SV=1 - [M1CJU6_SOLTU]	36.3741	4.83057	4.42	1	0.985535	1.06919	0.84288	1.03548	0.983272	0.908184	0.985819	1.08797	1.05471	1.00917	0.699568
Q75VR0	Two pore calcium channel protein 1B OS=Nicotiana tabacum GN=TPC1B PE=2 SV=1 - [TPC1B_TOBAC]	123.587	5.2749	8	5	0.97468	1.03414	1.00832	1.00013	1.00432	1.01168	0.990481	0.999636	0.993657	0.998863	0.699585
M1AS86	Uncharacterized protein OS=Solanum tuberosum GN=PGSC0003DMG400011196 PE=4 SV=1 - [M1AS86_SOLTU]	78.7457	8.00146	6.55	2	0.941021	1.0272	1.15145	0.982382	1.02551	1.06411	1.10006	0.960445	0.86409	0.997176	0.700419
M1AW40	Uncharacterized protein OS=Solanum tuberosum GN=PGSC0003DMG400012170 PE=4 SV=1 - [M1AW40_SOLTU]	21.1417	7.44482	7.94	1	0.963213	0.934563	1.14636	0.904129	0.987067	1.00729	1.16395	0.97836	0.920295	1.01747	0.700518
M1CCD1	Uncharacterized protein OS=Solanum tuberosum GN=PGSC0003DMG400025035 PE=3 SV=1 - [M1CCD1_SOLTU]	32.5418	6.69775	2.72	1	1.0785	0.990741	1.05744	0.960788	1.02187	1.09221	1.04539	0.908351	0.960719	1.00167	0.700581
K4CGH0	Uncharacterized protein OS=Solanum lycopersicum GN=Solyc07g056370.2 PE=4 SV=1 - [K4CGH0_SOLLC]	34.6612	5.04639	2.55	1	0.960052	0.988858	0.875085	1.12236	0.986588	1.01135	0.89525	1.07812	1.06887	1.0134	0.700629
K4CY71	Uncharacterized protein OS=Solanum lycopersicum GN=Solyc10g008950.2 PE=4 SV=1 - [K4CY71_SOLLC]	121.17	6.72705	2.43	2	0.879244	1.0302	1.10307	0.961185	0.993424	1.1305	0.935034	0.974599	1.03679	1.01923	0.701141
M1BCH1	Uncharacterized protein OS=Solanum tuberosum GN=PGSC0003DMG400016319 PE=4 SV=1 - [M1BCH1_SOLTU]	56.2257	6.90283	1.4	1	1.09257	0.949649	1.10597	0.844792	0.998245	1.24482	1.13504	1.01544	0.786438	1.04543	0.701359
M1C9X0	Uncharacterized protein OS=Solanum tuberosum GN=PGSC0003DMG401024510 PE=3 SV=1 - [M1C9X0_SOLTU]	52.1359	6.45557	1.84	1	1.10094	1.05983	0.983102	0.921976	1.01646	1.0433	0.948976	1.07639	0.906714	0.993844	0.701386
M0ZIM7	Uncharacterized protein OS=Solanum tuberosum GN=PGSC0003DMG402000567 PE=4 SV=1 - [M0ZIM7_SOLTU]	18.3783	9.17334	13.92	2	1.01581	0.997618	0.916182	0.987929	0.979384	0.982862	0.923212	0.977886	1.10537	0.997333	0.702539
K4AWT6	Uncharacterized protein OS=Solanum lycopersicum GN=Solyc01g066860.2 PE=4 SV=1 - [K4AWT6_SOLLC]	16.9941	5.75732	14.19	2	0.978925	0.938329	1.22609	0.81559	0.989733	0.979262	1.17828	0.905151	1.06421	1.03173	0.702686
K4D8N5	Uncharacterized protein OS=Solanum lycopersicum GN=Solyc11g050710.1 PE=4 SV=1 - [K4D8N5_SOLLC]	84.0593	6.15088	1.04	1	0.907681	0.99878	1.00611	1.13932	1.01297	0.894164	0.968843	0.994499	1.09374	0.987812	0.703919
M1B7U8	Uncharacterized protein OS=Solanum tuberosum GN=PGSC0003DMG400015138 PE=4 SV=1 - [M1B7U8_SOLTU]	40.1584	8.07471	1.95	1	0.970532	1.08479	0.830787	1.06262	0.987183	1.04234	0.917381	1.04999	1.04578	1.01387	0.703998
M1CJ70	Uncharacterized protein OS=Solanum tuberosum GN=PGSC0003DMG400026653 PE=4 SV=1 - [M1CJ70_SOLTU]	12.6907	6.1001	5.98	1	1.02328	1.05495	0.942174	1.0222	1.01065	0.980968	0.866815	1.10726	0.998707	0.988438	0.704284
K4D3B4	Uncharacterized protein OS=Solanum lycopersicum GN=Solyc10g083270.1 PE=4 SV=1 - [K4D3B4_SOLLC]	36.9548	7.6499	2.72	1	1.03764	0.947895	0.976033	1.14042	1.0255	1.16841	0.916088	0.937974	0.964275	0.996688	0.704345
M1AVD7	Uncharacterized protein OS=Solanum tuberosum GN=PGSC0003DMG400011972 PE=3 SV=1 - [M1AVD7_SOLTU]	31.729	4.99561	4.2	1	0.969148	0.840175	1.25471	0.886576	0.987653	0.946043	1.15563	0.871754	1.16725	1.03517	0.70437
M1BRF5	Uncharacterized protein OS=Solanum tuberosum GN=PGSC0003DMG400019889 PE=3 SV=1 - [M1BRF5_SOLTU]	68.0544	7.95752	2.31	1	1.08464	1.0737	0.872122	0.866505	0.974241	0.784748	1.24704	1.04811	0.99762	1.01938	0.7049
M1ACF3	Uncharacterized protein OS=Solanum tuberosum GN=PGSC0003DMG401007604 PE=4 SV=1 - [M1ACF3_SOLTU]	40.3236	5.42725	11.11	4	0.930833	1.07715	0.995944	0.982116	0.99651	0.961058	0.966462	0.980231	1.02403	0.982945	0.705035
M1AFU6	Uncharacterized protein OS=Solanum tuberosum GN=PGSC0003DMG400008492 PE=4 SV=1 - [M1AFU6_SOLTU]	37.8886	8.74854	11.38	5	1.01884	1.03773	0.898399	0.960845	0.978954	0.93864	0.840198	1.0907	1.18	1.01238	0.705218
M1D5U5	Uncharacterized protein OS=Solanum tuberosum GN=PGSC0003DMG400032509 PE=4 SV=1 - [M1D5U5_SOLTU]	15.8045	9.0708	6.02	1	0.949524	0.991066	0.87765	1.09572	0.97849	0.940668	0.860343	1.06544	1.18166	1.01203	0.705728
K4BM58	Uncharacterized protein OS=Solanum lycopersicum GN=Solyc03g119090.2 PE=4 SV=1 - [K4BM58_SOLLC]	45.2773	6.78564	1.67	1	0.973336	1.13326	0.890714	1.05275	1.01252	1.00451	0.868094	1.03435	1.03862	0.986392	0.705852
M1BIZ4	Uncharacterized protein OS=Solanum tuberosum GN=PGSC0003DMG400017991 PE=4 SV=1 - [M1BIZ4_SOLTU]	25.8218	8.77783	3.9	1	1.01696	1.07294	0.867498	0.968591	0.981498	1.09545	0.937668	1.02995	0.952909	1.00399	0.70657
M1CML0	Uncharacterized protein OS=Solanum tuberosum GN=PGSC0003DMG400027500 PE=4 SV=1 - [M1CML0_SOLTU]	15.4559	5.56689	8.57	1	1.03492	0.984259	1.30048	0.86765	1.04683	1.06763	1.21696	0.845466	0.854892	0.996235	0.706619
P62114	Protein PsbN OS=Nicotiana tabacum GN=psbN PE=3 SV=1 - [PSBN_TOBAC]	389.834	7.2251	7.73	7	1.01909	1.04181	0.903613	0.997566	0.990521	1.07559	0.889226	1.09808	0.988925	1.01295	0.706666
M1C2L0	Uncharacterized protein OS=Solanum tuberosum GN=PGSC0003DMG400022678 PE=4 SV=1 - [M1C2L0_SOLTU]	46.0888	6.58057	3.1	1	0.959218	0.98171	0.944129	1.08664	0.992924	1.00962	0.932512	1.10012	1.00371	1.01149	0.706908
Q93X45	Uncharacterized protein OS=Solanum lycopersicum GN=app2 PE=2 SV=1 - [Q93X45_SOLLC]	59.3902	6.44287	3	2	1.02905	1.05324	0.903717	1.0831	1.01728	1.10419	0.944619	0.981034	0.954393	0.996058	0.707884
M1CK14	Lysine--tRNA ligase OS=Solanum tuberosum GN=PGSC0003DMG400026909 PE=3 SV=1 - [M1CK14_SOLTU]	63.9112	6.7417	13.7	7	0.944168	1.06199	0.940325	1.03934	0.996457	1.01705	0.938971	1.0484	1.04517	1.0124	0.708911
M1BM03	Uncharacterized protein OS=Solanum tuberosum GN=PGSC0003DMG400018701 PE=3 SV=1 - [M1BM03_SOLTU]	12.3655	9.53955	42.86	1	1.06754	0.927224	1.08048	0.922797	0.99951	1.06851	1.15339	1.07315	0.832039	1.03177	0.709063
Q8S8X7	Photosystem II CP43 chlorophyll apoprotein OS=Atropa belladonna GN=psbC PE=3 SV=1 - [PSBC_ATRBE]	5.91601	9.01221	45.28	1	0.98468	0.872134	1.01875	1.05898	0.983636	0.800657	1.13088	1.09451	1.04276	1.0172	0.709079
Q38JH2	Fructose-bisphosphate aldolase OS=Solanum tuberosum PE=2 SV=1 - [Q38JH2_SOLTU]	37.6426	7.92822	27.17	7	0.979261	1.02562	0.946676	1.02577	0.994329	0.933741	0.990779	1.02695	0.983343	0.983704	0.709606
M1CFN8	Uncharacterized protein OS=Solanum tuberosum GN=PGSC0003DMG400025849 PE=4 SV=1 - [M1CFN8_SOLTU]	99.4166	5.32568	2.08	2	1.01875	1.02074	0.929326	0.987731	0.989137	1.01074	0.980826	0.972384	1.03262	0.999142	0.709791
Q0PY41	Leucine-rich repeat family protein OS=Solanum lycopersicum PE=4 SV=1 - [Q0PY41_SOLLC]	65.6632	6.85889	1.34	1	0.950689	0.974179	0.995434	1.01	0.982576	1.08753	0.749885	1.19644	1.05389	1.02194	0.709878
M1B931	Proteasome subunit alpha type OS=Solanum tuberosum GN=PGSC0003DMG400015462 PE=3 SV=1 - [M1B931_SOLTU]	29.6447	5.50342	16.12	4	0.950058	0.989499	1.14739	1.02329	1.02756	0.942731	1.03539	0.998881	1.05538	1.00809	0.70991
M1C888	Uncharacterized protein OS=Solanum tuberosum GN=PGSC0003DMG400024095 PE=4 SV=1 - [M1C888_SOLTU]	18.9007	8.30908	7.65	1	0.947318	1.03876	1.22734	0.970439	1.04596	1.05866	1.22636	0.857789	0.872053	1.00372	0.71005
M1C0M5	Uncharacterized protein OS=Solanum tuberosum GN=PGSC0003DMG400022220 PE=4 SV=1 - [M1C0M5_SOLTU]	44.4321	5.94775	2.23	1	0.920812	1.03585	0.995878	1.04762	1.00004	1.01807	0.999243	1.00188	1.02857	1.01194	0.710678
K4D3D6	Uncharacterized protein OS=Solanum lycopersicum GN=Solyc10g083490.1 PE=3 SV=1 - [K4D3D6_SOLLC]	50.586	5.87158	13.75	5	0.962818	0.940083	1.18292	0.996259	1.02052	0.983842	1.09186	1.00696	0.891694	0.99359	0.710756
K4AX94	Uncharacterized protein OS=Solanum lycopersicum GN=Solyc01g068480.2 PE=4 SV=1 - [K4AX94_SOLLC]	180.995	5.61768	1.7	2	0.841537	0.826305	1.22267	1.04913	0.98491	1.06323	1.16856	0.871688	1.01253	1.029	0.710882
K4CNT4	Uncharacterized protein OS=Solanum lycopersicum GN=Solyc08g079260.2 PE=4 SV=1 - [K4CNT4_SOLLC]	38.8938	4.90674	6.94	1	1.1292	1.04621	1.18467	0.780163	1.03506	0.944097	1.22014	0.86836	0.922164	0.988691	0.711137
Q36915	ATP synthase subunit alpha OS=Petunia parodii GN=atpA-1 PE=3 SV=1 - [Q36915_PETPA]	6.11336	5.26221	38.33	1	0.988386	0.99879	0.824208	1.11083	0.980554	0.925417	0.904635	1.05411	1.17094	1.01378	0.711254
K4B6B8	Uncharacterized protein OS=Solanum lycopersicum GN=Solyc02g062290.2 PE=4 SV=1 - [K4B6B8_SOLLC]	77.2718	5.8208	3.62	2	0.882565	0.970234	1.27248	0.985913	1.0278	1.05718	0.964469	0.925104	1.02123	0.991995	0.711416
M1CAQ4	Uncharacterized protein OS=Solanum tuberosum GN=PGSC0003DMG400024696 PE=4 SV=1 - [M1CAQ4_SOLTU]	26.0274	5.79541	14.74	3	1.00321	1.07549	0.878366	1.06456	1.00541	0.948324	0.952826	1.05697	0.982262	0.985097	0.711868
K4C2U9	Uncharacterized protein OS=Solanum lycopersicum GN=Solyc05g056250.2 PE=3 SV=1 - [K4C2U9_SOLLC]	60.9104	6.49365	15.81	7	0.962781	0.99442	1.03503	0.98421	0.99411	0.97114	1.06437	0.959431	1.02646	1.00535	0.712525
M1BE40	Uncharacterized protein OS=Solanum tuberosum GN=PGSC0003DMG400016726 PE=4 SV=1 - [M1BE40_SOLTU]	61.8287	6.41748	15.11	1	1.08511	1.03874	0.945292	0.989421	1.01464	1.04471	0.987739	1.03856	0.923776	0.998696	0.712591
M1BSC3	Uncharacterized protein OS=Solanum tuberosum GN=PGSC0003DMG401020126 PE=4 SV=1 - [M1BSC3_SOLTU]	55.9472	5.8335	2.76	1	0.920126	1.01101	0.999437	1.11543	1.0115	0.981915	0.984352	0.984506	1.02861	0.994845	0.712614
K4ATA1	Uncharacterized protein OS=Solanum lycopersicum GN=Solyc01g009050.2 PE=4 SV=1 - [K4ATA1_SOLLC]	70.6808	6.63916	3.73	3	0.964089	1.02023	1.03396	1.02882	1.01178	0.99817	0.994664	1.03897	0.984077	1.00397	0.712738
K4C2D8	Uncharacterized protein OS=Solanum lycopersicum GN=Solyc05g054600.2 PE=3 SV=1 - [K4C2D8_SOLLC]	54.976	8.45557	5.81	3	0.974679	1.00791	1.03679	0.967391	0.996691	0.994504	1.00717	0.974316	0.98319	0.989795	0.713324
M1AZ99	Uncharacterized protein OS=Solanum tuberosum GN=PGSC0003DMG400012875 PE=3 SV=1 - [M1AZ99_SOLTU]	62.8516	4.83057	11.19	4	1.05027	1.0784	0.931434	0.953091	1.0033	0.974127	1.02035	0.967198	0.991331	0.988252	0.713335
Q03198	Proteinase inhibitor I-A OS=Nicotiana tabacum GN=TIMPB PE=2 SV=1 - [IPIA_TOBAC]	11.8724	8.00146	16.82	1	0.977866	0.971233	1.05998	0.910423	0.979876	0.797168	1.13268	1.07855	1.03699	1.01135	0.714598
K4BKZ5	Uncharacterized protein OS=Solanum lycopersicum GN=Solyc03g114930.2 PE=4 SV=1 - [K4BKZ5_SOLLC]	20.1035	9.08545	11.11	2	1.08789	1.04168	0.84489	1.076	1.01262	0.99296	0.817511	1.13615	0.971127	0.979436	0.714615
M1AA98	Uncharacterized protein OS=Solanum tuberosum GN=PGSC0003DMG400007076 PE=4 SV=1 - [M1AA98_SOLTU]	21.1403	10.2134	5.38	1	0.957076	0.899371	1.15231	1.05288	1.01541	0.957862	1.00327	0.945826	1.05903	0.991498	0.714856
Q41330	Homeotic protein knotted-1 OS=Solanum lycopersicum GN=KN1 PE=2 SV=1 - [KN1_SOLLC]	254.963	6.53662	6.05	2	0.995118	0.861249	1.2654	0.853759	0.993882	0.891996	1.18469	0.944292	1.13911	1.04002	0.714879
M0ZM76	Uncharacterized protein OS=Solanum tuberosum GN=PGSC0003DMG400001464 PE=3 SV=1 - [M0ZM76_SOLTU]	34.566	9.72998	4.05	1	1.00851	0.910467	1.25988	0.994322	1.04329	1.03657	1.24254	0.844511	0.866781	0.997602	0.714979
Q076B0	RPN8 (Fragment) OS=Nicotiana benthamiana PE=2 SV=1 - [Q076B0_NICBE]	25.9976	5.88428	9.17	2	0.99744	1.07329	0.902556	1.07501	1.01207	1.06103	0.902473	1.03834	0.962988	0.991206	0.715317
K4CU78	Photosystem II reaction center psb28 protein OS=Solanum lycopersicum GN=Solyc09g064500.2 PE=3 SV=1 - [K4CU78_SOLLC]	13.1207	9.49561	13.33	1	1.13601	1.04371	0.913862	0.984395	1.01949	1.06167	1.02595	1.04181	0.842837	0.993066	0.715346
Q42934	Pectinesterase (Fragment) OS=Nicotiana plumbaginifolia PE=2 SV=1 - [Q42934_NICPL]	20.1353	8.95361	15.76	1	1.04688	0.949497	1.00742	0.985575	0.997345	1.05287	1.00958	1.022	0.950236	1.00867	0.715392
Q41440	Mitochondrial processing peptidase OS=Solanum tuberosum GN=MPP PE=2 SV=1 - [Q41440_SOLTU]	54.5151	6.40479	8.33	2	1.04067	1.15018	0.868688	0.975587	1.00878	0.998885	0.927631	1.00589	1.005	0.984352	0.715481
Q7XZS6	Glutathione peroxidase OS=Solanum lycopersicum GN=LOC544261 PE=2 SV=1 - [Q7XZS6_SOLLC]	18.9188	6.7124	9.58	2	0.993274	1.13157	0.908479	1.00911	1.01061	0.966946	0.919198	1.05159	1.02143	0.989792	0.718083
K4DH36	Uncharacterized protein OS=Solanum lycopersicum GN=Solyc12g094640.1 PE=3 SV=1 - [K4DH36_SOLLC]	12.8757	4.88135	34.17	1	1.06593	0.872209	0.928487	1.04396	0.977646	0.987357	0.942931	1.06009	1.00051	0.997723	0.718091
K4C726	Uncharacterized protein OS=Solanum lycopersicum GN=Solyc06g062950.1 PE=4 SV=1 - [K4C726_SOLLC]	82.6795	6.62451	3.09	2	0.928428	0.97152	1.13654	0.95578	0.998067	0.989219	1.14142	0.987469	0.967945	1.02151	0.718159
K4C1Z0	Uncharacterized protein OS=Solanum lycopersicum GN=Solyc05g053100.2 PE=3 SV=1 - [K4C1Z0_SOLLC]	61.2451	7.06396	8.23	5	0.951594	0.994513	1.04187	0.980072	0.992012	1.02166	0.958047	1.04801	0.981883	1.0024	0.71917
M0ZVR1	Uncharacterized protein OS=Solanum tuberosum GN=PGSC0003DMG402003567 PE=4 SV=1 - [M0ZVR1_SOLTU]	40.4315	8.20654	30.94	3	1.05838	1.03235	0.899947	1.08055	1.01781	1.12769	0.888293	1.05472	0.89057	0.990318	0.71936
K4C5S4	Uncharacterized protein OS=Solanum lycopersicum GN=Solyc06g051310.2 PE=4 SV=1 - [K4C5S4_SOLLC]	192.531	5.42725	14.52	4	0.984316	1.03585	0.952637	1.03766	1.00262	1.05408	1.01388	0.969908	1.0132	1.01277	0.719696
K4BUA0	Uncharacterized protein OS=Solanum lycopersicum GN=Solyc04g076620.2 PE=4 SV=1 - [K4BUA0_SOLLC]	397.005	5.13525	1.75	6	0.991801	1.00959	1.16421	0.956815	1.0306	0.945135	1.08949	0.927063	1.06758	1.00732	0.719707
M1AWE0	Uncharacterized protein OS=Solanum tuberosum GN=PGSC0003DMG400012225 PE=3 SV=1 - [M1AWE0_SOLTU]	23.0323	9.34912	13.36	2	0.911906	0.980969	1.07756	0.963027	0.983365	0.956274	1.09299	0.981139	0.973163	1.00089	0.71978
M1D7P9	Adenylyl cyclase-associated protein OS=Solanum tuberosum GN=PGSC0003DMG400033911 PE=3 SV=1 - [M1D7P9_SOLTU]	50.7978	7.15186	9.77	5	0.979114	1.05014	0.940558	1.01112	0.995231	0.975988	0.974053	1.04154	1.03387	1.00636	0.720105
P09974	Photosystem II reaction center protein Z OS=Nicotiana tabacum GN=psbZ PE=1 SV=1 - [PSBZ_TOBAC]	243.322	7.91357	2.3	2	0.841114	1.09453	1.10217	1.09337	1.0328	1.10148	1.06966	0.835581	0.993416	1.00003	0.720144
C0KFW7	COSII_At1g32130 (Fragment) OS=Solanum albornozii PE=4 SV=1 - [C0KFW7_9SOLN]	24.1613	4.41162	20.75	1	0.959683	0.998986	0.895628	1.0875	0.98545	0.915543	0.953161	1.17847	1.00101	1.01205	0.721185
M1BV48	Uncharacterized protein OS=Solanum tuberosum GN=PGSC0003DMG400020781 PE=4 SV=1 - [M1BV48_SOLTU]	48.3736	5.64307	14.29	6	0.964964	0.964442	0.915712	1.06429	0.977351	0.944885	0.918985	1.03653	1.08314	0.995885	0.72175
M1C8Q0	Uncharacterized protein OS=Solanum tuberosum GN=PGSC0003DMG402024210 PE=4 SV=1 - [M1C8Q0_SOLTU]	44.3332	6.17627	10.62	3	0.887692	1.06648	0.8577	1.1184	0.982569	0.823844	0.882658	0.985695	1.10469	0.949223	0.721758
M1B5Q4	Uncharacterized protein OS=Solanum tuberosum GN=PGSC0003DMG400014540 PE=4 SV=1 - [M1B5Q4_SOLTU]	104.604	7.1665	3.66	2	1.02993	1.00705	0.989877	1.00046	1.00683	0.996284	0.970489	1.04142	1.05074	1.01473	0.72196
Q94F65	1-aminocyclopropane-1-carboxylate oxidase OS=Solanum tuberosum GN=ACO2 PE=2 SV=1 - [Q94F65_SOLTU]	121.224	5.84619	7.18	3	0.98786	1.04734	0.978318	0.994796	1.00208	1.01684	0.993725	1.03867	0.988022	1.00931	0.721984
M1CR31	Uncharacterized protein OS=Solanum tuberosum GN=PGSC0003DMG400028342 PE=4 SV=1 - [M1CR31_SOLTU]	47.0029	6.29053	6.38	3	0.985439	0.93155	1.02354	1.07369	1.00355	1.00687	1.02424	0.983427	1.05006	1.01615	0.722388
K4D762	Ribosomal protein S7 OS=Solanum lycopersicum GN=Solyc11g021130.1 PE=3 SV=1 - [K4D762_SOLLC]	31.9734	10.4917	12.98	1	1.07192	1.05437	1.04253	0.928981	1.02445	1.1283	1.02147	0.985391	0.868556	1.00093	0.72265
M1CF38	Uncharacterized protein OS=Solanum tuberosum GN=PGSC0003DMG400025749 PE=4 SV=1 - [M1CF38_SOLTU]	69.8065	5.5542	3.49	2	0.997044	0.914472	1.14456	0.930654	0.996683	0.998007	1.16008	0.950853	0.982327	1.02282	0.722921
P83379	Purple acid phosphatase isozyme LeSAP2 (Fragment) OS=Solanum lycopersicum PE=1 SV=1 - [PPH2_SOLLC]	604.548	6.97607	1.33	3	1.02911	0.91062	1.04659	1.02731	1.00341	1.03831	1.13378	0.954388	0.964567	1.02276	0.723024
K4CN44	Uncharacterized protein OS=Solanum lycopersicum GN=Solyc08g076840.2 PE=4 SV=1 - [K4CN44_SOLLC]	31.5582	8.20654	6.32	2	0.980321	1.12318	1.01465	0.919082	1.00931	0.92111	0.998519	1.02986	1.01384	0.990832	0.723066
Q2XPV4	40S ribosomal protein S10-like OS=Solanum tuberosum GN=PGSC0003DMG402029274 PE=2 SV=1 - [Q2XPV4_SOLTU]	12.9355	9.74463	44.17	2	1.0148	0.967466	0.89644	1.05071	0.982353	0.938067	0.949714	1.03191	1.0804	1.00002	0.723171
K4BJ06	Uncharacterized protein OS=Solanum lycopersicum GN=Solyc03g095840.2 PE=4 SV=1 - [K4BJ06_SOLLC]	13.7503	7.50342	15.83	2	0.959632	0.930923	1.07411	1.10429	1.01724	1.0519	1.05532	0.989939	0.88559	0.995686	0.723277
M0ZHD0	Uncharacterized protein OS=Solanum tuberosum GN=PGSC0003DMG400000302 PE=4 SV=1 - [M0ZHD0_SOLTU]	39.9684	7.73779	14.72	4	1.01843	0.972935	0.975174	1.09525	1.01545	1.01705	0.946678	1.04865	0.996214	1.00215	0.723374
K4BF53	Uncharacterized protein OS=Solanum lycopersicum GN=Solyc03g025800.2 PE=4 SV=1 - [K4BF53_SOLLC]	7.84962	10.6528	14.71	1	0.901904	1.14651	0.995735	0.904717	0.987216	0.916948	0.989921	1.06921	1.07516	1.01281	0.723558
K4CMQ6	Uncharacterized protein OS=Solanum lycopersicum GN=Solyc08g075390.2 PE=4 SV=1 - [K4CMQ6_SOLLC]	88.4867	5.14795	4.09	3	0.995146	1.01893	0.876764	1.10473	0.998893	0.989738	0.943877	1.08224	1.06475	1.02015	0.724019
M1CWI5	Uncharacterized protein OS=Solanum tuberosum GN=PGSC0003DMG400029663 PE=4 SV=1 - [M1CWI5_SOLTU]	41.8527	6.94678	6.51	2	0.976372	0.882363	1.11452	0.942089	0.978836	0.957709	1.03069	0.945499	1.06672	1.00015	0.724938
K4D9S3	Uncharacterized protein OS=Solanum lycopersicum GN=Solyc11g066660.1 PE=4 SV=1 - [K4D9S3_SOLLC]	50.3313	6.18896	2.68	1	1.07603	0.878876	1.00049	1.09743	1.01321	0.800789	1.19199	0.92326	0.994613	0.977663	0.725547
K4DDN6	Uncharacterized protein OS=Solanum lycopersicum GN=Solyc12g021170.1 PE=4 SV=1 - [K4DDN6_SOLLC]	67.643	7.26904	4.28	2	1.00002	0.958774	1.04564	1.02896	1.00835	1.0127	1.06358	0.973469	0.933968	0.99593	0.725902
M0ZRN8	Uncharacterized protein OS=Solanum tuberosum GN=PGSC0003DMG400002566 PE=4 SV=1 - [M0ZRN8_SOLTU]	21.3672	4.75439	6.84	1	1.0359	0.942058	0.989118	0.966804	0.983471	0.870312	0.932818	1.09962	1.13203	1.00869	0.726069
M1C5K0	Uncharacterized protein OS=Solanum tuberosum GN=PGSC0003DMG402023454 PE=4 SV=1 - [M1C5K0_SOLTU]	32.3457	5.18604	3.17	1	0.991888	1.13689	1.03794	0.908799	1.01888	1.01598	1.07823	0.90433	0.989049	0.996898	0.726193
Q6T7F2	Phosphoribosylformylglycinamidine cyclo-ligase OS=Solanum tuberosum GN=purM PE=2 SV=1 - [Q6T7F2_SOLTU]	17.2207	5.12256	9.76	1	0.933044	0.932567	1.27588	0.967993	1.02737	0.85802	1.11684	0.936811	1.04837	0.99001	0.726212
K4BY91	Uncharacterized protein OS=Solanum lycopersicum GN=Solyc05g013700.2 PE=4 SV=1 - [K4BY91_SOLLC]	56.5447	9.05615	1.77	1	0.947884	1.16118	0.826477	1.01584	0.987846	1.08183	0.941284	0.971969	1.07306	1.01704	0.726365
M1CH50	Uncharacterized protein OS=Solanum tuberosum GN=PGSC0003DMG400026187 PE=4 SV=1 - [M1CH50_SOLTU]	100.612	6.68311	0.8	1	1.05886	1.20504	0.844379	0.961764	1.01751	1.03041	0.871252	1.14841	0.870449	0.980128	0.726594
J7H3V5	Uncharacterized protein OS=Capsicum annuum GN=ycf2 PE=3 SV=1 - [J7H3V5_CAPAN]	285.937	8.14795	2.25	2	1.02371	0.990758	1.04208	0.868347	0.981224	1.11835	1.15941	0.838479	0.935642	1.01297	0.726672
K7X8B8	Putative p23 co-chaperone OS=Solanum tuberosum PE=2 SV=1 - [K7X8B8_SOLTU]	27.2445	4.69092	2.73	1	0.982627	1.19715	0.923018	0.990056	1.02321	1.0992	1.04681	0.928407	0.907319	0.995432	0.726896
M1CXM2	Uncharacterized protein OS=Solanum tuberosum GN=PGSC0003DMG400029924 PE=4 SV=1 - [M1CXM2_SOLTU]	16.01	4.99561	22.76	3	1.06036	1.04976	0.90293	0.982672	0.998931	0.995414	0.955556	1.00955	1.10597	1.01662	0.727175
Q3HVK7	Glycoprotein-like protein OS=Solanum tuberosum GN=PGSC0003DMG400014700 PE=2 SV=1 - [Q3HVK7_SOLTU]	15.4056	10.4331	28.36	3	0.938689	1.0292	0.911059	1.08703	0.991494	1.12599	1.00667	0.964996	0.951383	1.01226	0.727213
K4DDW3	Uncharacterized protein OS=Solanum lycopersicum GN=Solyc12g032950.1 PE=4 SV=1 - [K4DDW3_SOLLC]	58.8916	6.40479	3.13	1	1.0566	0.991407	1.09319	0.991291	1.03312	1.00019	1.25156	0.925668	0.808131	0.996386	0.727479
M1AQ24	Uncharacterized protein OS=Solanum tuberosum GN=PGSC0003DMG402010673 PE=3 SV=1 - [M1AQ24_SOLTU]	57.7392	6.97607	1.68	1	1.04262	1.06952	0.92041	1.01645	1.01225	1.05767	0.901204	1.06413	0.950505	0.993376	0.728329
Q2VY14	CONSTANS interacting protein 5 (Fragment) OS=Solanum lycopersicum GN=CIP5 PE=2 SV=1 - [Q2VY14_SOLLC]	70.9966	4.83057	4.67	2	0.970015	0.897145	1.03327	1.06836	0.992196	1.0963	0.964123	1.07329	0.917817	1.01288	0.729477
K4DFG5	Uncharacterized protein OS=Solanum lycopersicum GN=Solyc12g044800.1 PE=4 SV=1 - [K4DFG5_SOLLC]	50.9931	6.7417	3.07	1	1.03491	0.77502	1.16961	0.969079	0.987155	0.908056	1.06264	0.953623	1.17127	1.0239	0.7298
M1AHZ8	Uncharacterized protein OS=Solanum tuberosum GN=PGSC0003DMG400008994 PE=4 SV=1 - [M1AHZ8_SOLTU]	20.5634	8.36768	6.32	1	1.01964	1.00128	0.853185	1.06324	0.984338	0.969048	0.877974	1.1117	1.08057	1.00982	0.729869
M1C6Z9	Uncharacterized protein OS=Solanum tuberosum GN=PGSC0003DMG401023760 PE=4 SV=1 - [M1C6Z9_SOLTU]	37.329	4.53857	11.97	4	1.00613	0.983211	0.989946	1.02332	1.00065	1.02757	0.928927	1.03125	0.976548	0.991073	0.730078
K4CQE5	Uncharacterized protein OS=Solanum lycopersicum GN=Solyc09g007560.2 PE=3 SV=1 - [K4CQE5_SOLLC]	29.2294	9.90576	20.38	4	0.971036	1.03056	1.02247	0.963388	0.996862	1.1222	1.00671	1.02103	0.90748	1.01435	0.730162
M1BZX2	Uncharacterized protein OS=Solanum tuberosum GN=PGSC0003DMG400022094 PE=4 SV=1 - [M1BZX2_SOLTU]	14.9295	5.66846	8.53	1	0.99771	0.991502	0.953798	1.09391	1.00923	0.9294	1.03391	0.969008	1.04622	0.994634	0.731783
K7WU04	Putative thioredoxin m2 OS=Solanum tuberosum PE=2 SV=1 - [K7WU04_SOLTU]	19.4152	8.79248	10.99	1	1.06365	0.977056	1.11758	0.882611	1.01022	0.896298	1.00155	0.993974	1.06022	0.988008	0.732782
M1C8D8	Uncharacterized protein OS=Solanum tuberosum GN=PGSC0003DMG401024140 PE=4 SV=1 - [M1C8D8_SOLTU]	42.7734	8.74854	2.84	1	0.954444	0.950164	1.11536	0.97532	0.998822	0.835777	1.28401	0.982842	1.04082	1.03586	0.732784
Q6RJX6	Induced stolon tip protein NAP1Ps (Fragment) OS=Capsicum annuum PE=2 SV=1 - [Q6RJX6_CAPAN]	17.7259	4.70361	26.32	1	1.01684	1.15685	0.811742	1.08553	1.01774	1.09039	0.899825	0.943411	1.0142	0.986956	0.73375
K4BCV6	Uncharacterized protein OS=Solanum lycopersicum GN=Solyc02g091580.2 PE=3 SV=1 - [K4BCV6_SOLLC]	90.8505	6.60986	8.67	6	0.915496	1.01849	1.13541	1.0294	1.0247	1.00898	1.07305	0.946177	0.99563	1.00596	0.733763
K4CBJ2	Uncharacterized protein OS=Solanum lycopersicum GN=Solyc07g007210.2 PE=4 SV=1 - [K4CBJ2_SOLLC]	103.369	5.80811	1.95	2	0.918392	0.999314	1.12014	0.961617	0.999867	1.0579	1.14078	0.90841	0.986388	1.02337	0.733821
M1HEU7	Uracil phsophoribosyltransferase OS=Solanum tuberosum PE=2 SV=1 - [M1HEU7_SOLTU]	24.2479	6.68311	11.16	2	1.00814	1.02264	1.08149	0.901651	1.00348	1.10983	1.05653	0.961999	0.960418	1.0222	0.733935
K4D402	Uncharacterized protein OS=Solanum lycopersicum GN=Solyc10g085680.1 PE=3 SV=1 - [K4D402_SOLLC]	55.3288	8.6167	4.43	2	1.08556	0.958058	0.992877	0.937761	0.993563	0.942158	1.11848	1.00368	0.981301	1.0114	0.733966
K4C285	Uncharacterized protein OS=Solanum lycopersicum GN=Solyc05g054060.2 PE=4 SV=1 - [K4C285_SOLLC]	52.1003	6.17627	12.37	4	1.05535	1.10359	0.901454	0.984089	1.01112	0.983143	0.986361	0.992058	1.01664	0.994551	0.73413
M1CY45	Uncharacterized protein OS=Solanum tuberosum GN=PGSC0003DMG400030056 PE=3 SV=1 - [M1CY45_SOLTU]	27.3999	6.17627	24.4	1	1.01735	1.02369	0.856011	0.95727	0.963579	0.888208	0.866554	1.08134	1.12897	0.99127	0.734709
K4BZD5	Uncharacterized protein OS=Solanum lycopersicum GN=Solyc05g018810.2 PE=3 SV=1 - [K4BZD5_SOLLC]	42.8958	4.4751	15.16	2	0.948194	1.0667	0.976488	1.0049	0.99907	0.998154	1.06057	1.00533	0.97647	1.01013	0.734996
G1CBZ5	Photosystem II CP43 chlorophyll apoprotein OS=Solanum tuberosum GN=psbC PE=3 SV=1 - [G1CBZ5_SOLTU]	50.3229	6.7124	29.72	10	0.99644	0.825036	1.04123	1.07299	0.983924	0.897365	1.05798	1.0769	1.00069	1.00823	0.735554
Q2VEI4	DNA-directed RNA polymerase subunit beta OS=Solanum tuberosum GN=rpoB PE=3 SV=1 - [RPOB_SOLTU]	120.553	8.32373	3.55	3	0.951679	0.891827	1.06716	1.10155	1.00306	1.06624	1.29543	0.995379	0.814422	1.04287	0.736265
M9WUV8	PIB67 14-3-3 protein OS=Petunia hybrida PE=2 SV=1 - [M9WUV8_PETHY]	21.866	5.03369	57.14	3	0.958413	1.00432	1.14541	0.989297	1.02436	0.978873	1.03368	0.966113	1.05223	1.00772	0.736454
M1AEX9	Uncharacterized protein OS=Solanum tuberosum GN=PGSC0003DMG400008269 PE=4 SV=1 - [M1AEX9_SOLTU]	47.43	4.99561	7.61	3	1.03198	0.999305	0.945139	1.10594	1.02059	1.07733	0.992334	1.00937	0.941547	1.00515	0.736693
M1BLV3	Uncharacterized protein OS=Solanum tuberosum GN=PGSC0003DMG400018667 PE=4 SV=1 - [M1BLV3_SOLTU]	36.192	4.31006	4.83	1	1.05969	0.97758	1.07288	0.885807	0.99899	1.00155	1.15917	0.986977	0.938754	1.02161	0.737597
M1AJL4	Uncharacterized protein OS=Solanum tuberosum GN=PGSC0003DMG400009345 PE=4 SV=1 - [M1AJL4_SOLTU]	40.9677	9.43701	2.41	1	1.20345	0.957361	0.892089	1.06079	1.02842	0.888179	0.928842	1.12279	1.05167	0.997872	0.737739
D1M6Z6	Blight resistance protein RGA2 OS=Capsicum annuum GN=RGA2 PE=2 SV=1 - [D1M6Z6_CAPAN]	108.557	8.11865	1.04	1	1.03422	1.06406	0.878922	1.0773	1.01363	1.07373	0.916325	0.958996	1.02478	0.993459	0.738754
P93338	NADP-dependent glyceraldehyde-3-phosphate dehydrogenase OS=Nicotiana plumbaginifolia GN=GAPN PE=2 SV=1 - [GAPN_NICPL]	38.6409	6.96143	20.56	1	0.948537	1.04986	0.91401	1.05387	0.991569	0.987467	0.923291	1.09801	1.02882	1.0094	0.738856
M1CTR1	Uncharacterized protein OS=Solanum tuberosum GN=PGSC0003DMG400028948 PE=4 SV=1 - [M1CTR1_SOLTU]	47.9198	9.21729	2.48	1	0.958885	1.07275	0.847001	1.16312	1.01044	0.908503	0.937913	1.07893	1.00547	0.982702	0.739025
O22616	Ornithine decarboxylase OS=Solanum lycopersicum GN=ODC PE=2 SV=2 - [DCOR_SOLLC]	82.8973	7.31299	9.47	2	0.938921	1.0861	0.790534	1.10601	0.980392	1.22707	0.917795	1.05723	0.870945	1.01826	0.739398
Q0GA16	Phototropin-2 OS=Solanum lycopersicum PE=2 SV=1 - [Q0GA16_SOLLC]	106.148	7.06396	2.21	1	0.948828	0.926276	1.13144	1.00161	1.00204	1.07487	1.07479	0.993203	0.943805	1.02167	0.739951
M1DCR5	Uncharacterized protein OS=Solanum tuberosum GN=PGSC0003DMG400036477 PE=4 SV=1 - [M1DCR5_SOLTU]	36.2825	5.2876	2.81	1	0.952506	1.09351	0.861412	1.0301	0.984382	0.954571	0.925419	1.06017	1.08583	1.0065	0.740692
M0ZY90	Uncharacterized protein OS=Solanum tuberosum GN=PGSC0003DMG401004125 PE=3 SV=1 - [M0ZY90_SOLTU]	57.8839	7.97217	10.21	3	1.04249	1.00812	0.843348	1.03236	0.981578	1.04756	0.81927	1.13544	1.03786	1.01003	0.7414
D9IWP0	Fructokinase-like protein 2 OS=Nicotiana benthamiana PE=2 SV=1 - [D9IWP0_NICBE]	69.6083	6.58057	2.4	1	0.852734	0.89885	1.2686	0.95675	0.994234	0.983516	1.02709	1.02724	1.07683	1.02867	0.741435
Q6R608	4-alpha-glucanotransferase OS=Solanum tuberosum GN=DE2 PE=2 SV=1 - [Q6R608_SOLTU]	109.813	5.96045	0.95	1	0.885819	0.964679	0.928981	1.14704	0.981629	1.12064	0.761499	1.16526	1.02821	1.0189	0.741831
K4DBV1	Uncharacterized protein OS=Solanum lycopersicum GN=Solyc12g008630.1 PE=3 SV=1 - [K4DBV1_SOLLC]	38.898	6.80029	12.78	2	0.977907	0.95794	1.22258	0.907523	1.01649	0.960707	1.22281	0.933254	0.791319	0.977023	0.742008
K4AT97	Uncharacterized protein OS=Solanum lycopersicum GN=Solyc01g009010.2 PE=3 SV=1 - [K4AT97_SOLLC]	25.0398	9.21729	5.91	1	0.942538	1.04784	1.10017	0.889137	0.994921	0.958891	1.25187	0.937251	0.955841	1.02596	0.742588
O65350	Nitrite reductase OS=Capsicum annuum PE=2 SV=1 - [O65350_CAPAN]	65.9011	7.2251	12.59	2	0.948985	1.04717	0.933205	1.0703	0.999913	1.0374	1.06735	0.987534	0.964714	1.01425	0.743621
M1AXT4	Uncharacterized protein OS=Solanum tuberosum GN=PGSC0003DMG400012549 PE=4 SV=1 - [M1AXT4_SOLTU]	58.3506	8.70459	6.25	1	0.962809	1.00574	1.09627	1.01829	1.02078	1.00245	1.13982	0.935147	0.927413	1.00121	0.743942
Q38JD8	Temperature-induced lipocalin OS=Solanum tuberosum GN=TIL' PE=2 SV=1 - [Q38JD8_SOLTU]	21.3549	5.98584	9.68	2	1.05323	0.990369	0.887676	1.03901	0.992569	1.12833	0.836992	1.12377	0.989895	1.01975	0.744017
M1D751	Uncharacterized protein OS=Solanum tuberosum GN=PGSC0003DMG400033584 PE=3 SV=1 - [M1D751_SOLTU]	40.0463	6.17627	12.74	4	1.00715	0.973022	1.13691	0.950983	1.01702	0.99068	1.01993	0.957345	1.03702	1.00124	0.744172
B2NIX3	Ascorbate peroxidase (Fragment) OS=Capsicum chinense GN=CcAPX PE=2 SV=1 - [B2NIX3_CAPCH]	20.3033	5.78271	17.74	1	1.0336	0.904557	1.07027	1.05441	1.01571	1.00963	1.10408	0.97567	0.894839	0.996056	0.744342
P12195	Putative uncharacterized protein ycf15 OS=Nicotiana tabacum GN=ycf15-A PE=5 SV=1 - [YCF15_TOBAC]	214.16	9.72998	1.45	1	0.99078	0.998013	0.930219	1.08453	1.00088	1.14308	0.994746	1.0139	0.927434	1.01979	0.744689
M1BWE4	Uncharacterized protein OS=Solanum tuberosum GN=PGSC0003DMG400021144 PE=4 SV=1 - [M1BWE4_SOLTU]	24.9142	9.36377	11.84	2	1.05828	0.944884	0.979646	0.972398	0.988802	0.966943	0.906469	1.03754	1.115	1.00649	0.744791
M1BXI3	Uncharacterized protein OS=Solanum tuberosum GN=PGSC0003DMG400021420 PE=3 SV=1 - [M1BXI3_SOLTU]	16.7552	10.9019	28.77	1	0.932165	1.04171	1.0665	0.958051	0.999606	1.1488	0.888647	1.05731	0.991063	1.02145	0.745672
K4BIQ9	Uncharacterized protein OS=Solanum lycopersicum GN=Solyc03g093830.2 PE=4 SV=1 - [K4BIQ9_SOLLC]	33.9628	6.93213	2.88	1	0.968642	1.02824	0.914787	1.03724	0.987228	1.04721	0.84857	1.03893	1.09964	1.00859	0.74583
Q01157	Glycine-rich cell wall structural protein (Fragment) OS=Solanum lycopersicum PE=2 SV=1 - [GRW10_SOLLC]	381.219	6.80029	5.43	9	0.968644	1.00083	1.05274	1.01793	1.01003	1.01034	1.0811	0.974719	0.922035	0.997049	0.74586
Q8VWP3	Glyceraldehyde-3-phosphate dehydrogenase (Fragment) OS=Capsicum annuum GN=gapA2 PE=1 SV=1 - [Q8VWP3_CAPAN]	26.9338	5.36377	30.16	1	0.946926	0.998423	0.853308	1.16738	0.991511	1.08892	0.9381	1.0347	1.00507	1.0167	0.74624
K4CXH1	Uncharacterized protein OS=Solanum lycopersicum GN=Solyc10g006400.2 PE=3 SV=1 - [K4CXH1_SOLLC]	50.8819	6.87354	12.39	4	1.00869	1.07286	0.884829	1.03974	1.00153	0.977519	0.94941	0.981854	1.03565	0.986109	0.747692
I0B7J4	Chloroplast PsbO4 OS=Nicotiana benthamiana GN=psbO4 PE=2 SV=1 - [I0B7J4_NICBE]	35.323	5.49072	45.65	3	1.02581	1.0522	0.907551	0.994679	0.995061	1.03591	0.892183	1.09878	1.02595	1.01321	0.747711
Q2VEC9	Photosystem I iron-sulfur center OS=Solanum tuberosum GN=psaC PE=3 SV=1 - [PSAC_SOLTU]	9.03219	7.07861	82.72	7	1.04292	0.939565	0.973552	0.961889	0.979482	0.898353	0.927373	1.1031	1.06466	0.998373	0.748242
K4CZP5	Uncharacterized protein OS=Solanum lycopersicum GN=Solyc10g045270.1 PE=4 SV=1 - [K4CZP5_SOLLC]	27.1627	8.07471	10.2	2	0.901362	0.994962	1.12045	0.97125	0.997006	1.02455	1.11232	0.942566	0.986864	1.01657	0.748731
M0ZNB0	Uncharacterized protein OS=Solanum tuberosum GN=PGSC0003DMG401001731 PE=3 SV=1 - [M0ZNB0_SOLTU]	27.568	5.96045	25.2	2	1.1101	0.872443	1.02988	1.04043	1.01321	0.828315	0.850249	1.0137	1.22017	0.978108	0.74945
M1B3D7	Uncharacterized protein OS=Solanum tuberosum GN=PGSC0003DMG400013933 PE=3 SV=1 - [M1B3D7_SOLTU]	32.585	7.48877	7.41	1	0.906131	0.947911	1.08857	0.992731	0.983836	0.982754	1.02569	0.966559	1.01748	0.998121	0.749505
A2PYH3	Alpha chain of nascent polypeptide associated complex OS=Nicotiana benthamiana GN=NbNACa1 PE=2 SV=1 - [A2PYH3_NICBE]	21.9108	4.50049	26.87	3	0.966688	0.949133	1.14194	0.887839	0.9864	1.05544	1.20879	0.932666	0.872233	1.01728	0.750071
M1B815	Uncharacterized protein OS=Solanum tuberosum GN=PGSC0003DMG400015187 PE=3 SV=1 - [M1B815_SOLTU]	26.598	8.38232	9.84	2	1.04532	1.09071	0.863122	0.973832	0.993245	1.05585	0.961875	1.04915	0.980815	1.01192	0.75008
K4CJ01	Uncharacterized protein OS=Solanum lycopersicum GN=LOC778245 PE=4 SV=1 - [K4CJ01_SOLLC]	6.96449	7.18115	18.33	1	0.858294	0.945393	1.11333	1.04394	0.990239	0.862806	1.2327	0.904828	1.09874	1.02477	0.750207
K4CII8	Uncharacterized protein OS=Solanum lycopersicum GN=Solyc08g007010.2 PE=4 SV=1 - [K4CII8_SOLLC]	47.1751	5.69385	1.65	1	1.12007	1.15772	0.996116	0.773617	1.01188	0.876856	0.832919	1.04208	1.145	0.974214	0.750542
M1C015	Uncharacterized protein OS=Solanum tuberosum GN=PGSC0003DMG400022126 PE=3 SV=1 - [M1C015_SOLTU]	39.1524	6.90283	20	7	0.974599	0.987724	0.975722	1.03662	0.993667	1.12181	1.03597	0.980491	0.902833	1.01027	0.750545
M1CAG8	Uncharacterized protein OS=Solanum tuberosum GN=PGSC0003DMG400024627 PE=4 SV=1 - [M1CAG8_SOLTU]	41.3808	6.66846	21.92	1	0.99825	1.16579	0.836087	1.04541	1.01139	1.0024	0.899692	0.978383	1.06212	0.985649	0.750789
Q6TF28	Rapid alkalinization factor 2 OS=Solanum chacoense GN=RALF2 PE=4 SV=1 - [Q6TF28_SOLCH]	5.99803	10.2866	29.63	2	1.04086	1.05877	0.813693	1.00653	0.979963	1.08164	0.833564	1.06801	1.04437	1.0069	0.751281
K4CGP0	Uncharacterized protein OS=Solanum lycopersicum GN=Solyc07g062070.2 PE=3 SV=1 - [K4CGP0_SOLLC]	39.9485	5.43994	3.19	1	1.02908	0.938678	1.03389	0.981679	0.995831	0.956665	0.953133	1.07285	1.05205	1.00867	0.751343
M1AUM4	Uncharacterized protein OS=Solanum tuberosum GN=PGSC0003DMG400011753 PE=4 SV=1 - [M1AUM4_SOLTU]	123.527	4.85596	0.82	1	0.978747	1.04623	1.03738	0.890268	0.988158	0.870072	1.12158	0.915541	1.1533	1.01512	0.75155
K4BXI9	Uncharacterized protein OS=Solanum lycopersicum GN=Solyc05g010160.2 PE=4 SV=1 - [K4BXI9_SOLLC]	112.497	4.81787	0.69	1	0.966031	0.92458	1.07004	1.17118	1.03296	1.20397	0.998827	0.969983	0.834432	1.0018	0.75329
B5LAW1	Putative aminotransferase OS=Capsicum annuum PE=2 SV=1 - [B5LAW1_CAPAN]	50.9924	8.19189	12.61	2	0.884717	1.02457	1.06439	1.02671	1.0001	1.04437	1.1033	1.03086	0.898553	1.01927	0.754554
K4BT18	Uncharacterized protein OS=Solanum lycopersicum GN=Solyc04g063280.2 PE=4 SV=1 - [K4BT18_SOLLC]	57.759	5.33838	1.32	1	0.958029	1.22825	0.876174	0.98298	1.01136	0.965799	0.830363	1.07364	1.05232	0.980529	0.754562
M0ZVI2	Uncharacterized protein OS=Solanum tuberosum GN=PGSC0003DMG400003514 PE=3 SV=1 - [M0ZVI2_SOLTU]	10.8995	5.30029	29.79	1	0.945202	0.997506	1.15378	1.04653	1.03575	1.06132	1.24453	0.805213	0.889303	1.00009	0.754961
O82530	Proteasome subunit alpha type-4 OS=Petunia hybrida GN=PAC1 PE=2 SV=1 - [PSA4_PETHY]	27.2145	5.74463	14.06	4	1.0147	1.0708	0.882464	1.01286	0.995207	0.955101	0.996115	1.04392	1.04582	1.01024	0.755132
M0ZY03	Uncharacterized protein OS=Solanum tuberosum GN=PGSC0003DMG400004067 PE=4 SV=1 - [M0ZY03_SOLTU]	45.2406	5.8335	2.56	1	1.03192	1.0311	0.832924	1.04094	0.984222	0.873191	1.02668	1.05902	1.06656	1.00636	0.755146
P37119	Cytochrome P450 71A3 (Fragment) OS=Solanum melongena GN=CYP71A3 PE=2 SV=1 - [C71A3_SOLME]	41.701	8.42627	3.01	1	0.909577	1.04416	1.04112	1.04258	1.00936	0.913761	0.935804	1.0306	1.08833	0.992124	0.755189
Q9SBQ7	S-adenosylmethionine synthase 3 OS=Petunia hybrida GN=SAM3 PE=2 SV=1 - [METK3_PETHY]	36.5506	6.40479	33.63	2	0.852808	1.04919	0.886437	1.0752	0.965909	0.848879	0.867701	1.05381	1.23213	1.00063	0.756664
Q00321	Type I (26 kD) CP29 polypeptide OS=Solanum lycopersicum GN=Cab9 PE=3 SV=1 - [Q00321_SOLLC]	30.5179	5.99854	17.13	4	0.994711	0.913514	0.88151	1.14797	0.984425	0.980538	0.919257	1.09549	1.03424	1.00738	0.757349
M0ZPM9	Uncharacterized protein OS=Solanum tuberosum GN=PGSC0003DMG400002066 PE=4 SV=1 - [M0ZPM9_SOLTU]	29.3841	7.88428	18.84	2	0.995606	1.04283	0.949398	1.0412	1.00726	0.998747	0.925274	1.06714	0.990659	0.995454	0.758152
M9WVA5	PIB08 14-3-3 protein OS=Petunia hybrida PE=2 SV=1 - [M9WVA5_PETHY]	27.1999	4.91943	40	4	1.00484	0.899745	1.19793	0.963027	1.01639	0.929846	1.11036	0.904283	1.01889	0.990845	0.759869
M0ZH08	Uncharacterized protein OS=Solanum tuberosum GN=PGSC0003DMG400000214 PE=4 SV=1 - [M0ZH08_SOLTU]	46.6779	5.0083	10.86	5	0.995878	1.07258	0.878969	1.02621	0.99341	1.00983	0.906191	1.06476	1.06395	1.01118	0.760281
P49319	Catalase isozyme 1 OS=Nicotiana tabacum GN=CAT-1 PE=1 SV=2 - [CATA1_TOBAC]	56.7882	7.07861	28.46	1	1.0383	1.02774	1.10193	0.90523	1.0183	0.96815	1.05636	0.983937	1.0062	1.00366	0.762181
Q2XPV0	Adenosine kinase isoform 1T-like protein OS=Solanum tuberosum PE=2 SV=1 - [Q2XPV0_SOLTU]	37.5487	5.12256	24.34	1	0.96325	0.982113	0.885307	1.05686	0.971882	0.864603	0.968346	1.05843	1.07154	0.990731	0.762881
M1ANH5	Uncharacterized protein OS=Solanum tuberosum GN=PGSC0003DMG400010291 PE=4 SV=1 - [M1ANH5_SOLTU]	15.3176	10.4331	22.56	2	1.00313	1.03158	0.906992	1.11375	1.01386	1.01967	0.922042	1.03802	1.01215	0.99797	0.76306
Q8SAG2	Thioredoxin peroxidase OS=Capsicum annuum PE=2 SV=1 - [Q8SAG2_CAPAN]	17.3951	6.53662	15.43	3	1.02721	1.14311	0.822812	1.03235	1.00637	0.919684	0.832423	1.07541	1.08348	0.977748	0.763076
M1D5E4	Uncharacterized protein OS=Solanum tuberosum GN=PGSC0003DMG400032182 PE=4 SV=1 - [M1D5E4_SOLTU]	20.2423	7.56201	3.68	1	0.923869	1.16864	0.827974	1.01754	0.984506	1.11594	0.823775	1.12875	0.99739	1.01646	0.763117
M1CHK3	Peptidyl-prolyl cis-trans isomerase OS=Solanum tuberosum GN=PGSC0003DMG400026290 PE=4 SV=1 - [M1CHK3_SOLTU]	24.0645	8.22119	7.96	2	0.989527	1.05743	0.928857	0.964906	0.985181	1.03157	0.892459	1.06598	1.0094	0.999853	0.763546
K4CHK7	Uncharacterized protein OS=Solanum lycopersicum GN=Solyc07g065280.2 PE=4 SV=1 - [K4CHK7_SOLLC]	4.50323	9.31982	30.95	1	1.02955	0.891984	0.82139	1.1877	0.982655	1.04657	0.831391	1.10109	1.08021	1.01482	0.763889
M1CRA9	Uncharacterized protein OS=Solanum tuberosum GN=PGSC0003DMG400028384 PE=4 SV=1 - [M1CRA9_SOLTU]	57.8407	6.3667	2.72	2	0.99748	1.11113	0.936164	0.992473	1.00931	0.986139	0.706484	1.04426	1.16642	0.975827	0.764274
M1CMN2	Uncharacterized protein OS=Solanum tuberosum GN=PGSC0003DMG400027514 PE=4 SV=1 - [M1CMN2_SOLTU]	48.5399	7.89893	3.13	1	1.00597	0.980681	1.12148	0.873241	0.995342	1.03534	1.19815	0.749742	1.14034	1.03089	0.764936
P14675	Alcohol dehydrogenase 3 OS=Solanum tuberosum GN=ADH3 PE=2 SV=1 - [ADH3_SOLTU]	109.021	9.65674	18.39	2	1.00073	0.934876	0.8975	1.09438	0.981871	0.904262	0.930327	1.07203	1.10322	1.00246	0.765641
K4B196	Uncharacterized protein OS=Solanum lycopersicum GN=Solyc01g100650.2 PE=4 SV=1 - [K4B196_SOLLC]	116.985	5.77002	1.3	1	1.00928	0.91152	1.27032	0.924965	1.02902	1.09614	1.09121	0.829193	0.96885	0.996349	0.765769
M1CL27	Uncharacterized protein OS=Solanum tuberosum GN=PGSC0003DMG400027125 PE=3 SV=1 - [M1CL27_SOLTU]	42.6886	6.40479	31.9	1	1.03699	1.12715	0.850654	1.12097	1.03394	1.23621	0.868718	1.06521	0.821253	0.997849	0.765971
K4DCZ1	Uncharacterized protein OS=Solanum lycopersicum GN=Solyc12g014560.1 PE=3 SV=1 - [K4DCZ1_SOLLC]	38.0799	9.5249	4.03	1	1.03825	0.928158	1.17083	0.972259	1.02737	1.06823	1.11154	0.953857	0.883549	1.00429	0.766673
F8WQS4	Quinone reductase (Fragment) OS=Nicotiana benthamiana GN=GR PE=2 SV=1 - [F8WQS4_NICBE]	21.2286	6.17627	15.08	1	1.03184	1.13118	0.830391	1.10334	1.02419	1.04185	0.858274	1.0115	1.08113	0.998189	0.767378
K4BFN4	Uncharacterized protein OS=Solanum lycopersicum GN=Solyc03g033620.2 PE=4 SV=1 - [K4BFN4_SOLLC]	53.4836	6.91748	3.35	2	0.993027	1.12964	0.895176	0.966393	0.996059	0.988603	0.872101	1.00793	1.03959	0.977055	0.76745
M1D2R2	Serine/threonine-protein phosphatase OS=Solanum tuberosum GN=PGSC0003DMG400031130 PE=3 SV=1 - [M1D2R2_SOLTU]	105.433	5.2876	11.31	4	0.929095	0.94279	1.08132	0.996842	0.987513	1.0157	1.0216	0.934632	1.02921	1.00029	0.767543
K4AZ93	Uncharacterized protein OS=Solanum lycopersicum GN=Solyc01g091530.2 PE=4 SV=1 - [K4AZ93_SOLLC]	36.9531	5.77002	4.24	2	1.00007	1.13871	0.931956	1.02167	1.0231	1.03399	0.983189	0.975812	1.04095	1.00848	0.767916
M1C8L3	Uncharacterized protein OS=Solanum tuberosum GN=PGSC0003DMG400024187 PE=3 SV=1 - [M1C8L3_SOLTU]	29.2926	4.729	27.31	1	0.948971	1.12809	0.837528	1.13269	1.01182	0.953075	0.911446	1.02471	1.05814	0.986843	0.76823
K4BQP1	Proteasome subunit beta type OS=Solanum lycopersicum GN=Solyc04g024420.2 PE=3 SV=1 - [K4BQP1_SOLLC]	29.4559	6.94678	6.96	2	0.97973	1.1137	0.920577	0.982685	0.999173	0.91514	0.979198	1.00787	1.03458	0.984197	0.768256
K4CRB9	Uncharacterized protein OS=Solanum lycopersicum GN=Solyc09g010930.2 PE=4 SV=1 - [K4CRB9_SOLLC]	27.5474	6.30322	15.69	1	1.037	0.912007	1.26917	0.866708	1.02122	1.00513	1.18743	0.90576	0.842937	0.985314	0.770367
[truncated: 605 more rows]

## Sheet: 117 DEPs
Accession	DE	Description
[truncated: 117 more rows]
